# Supplementary material for: Design, synthesis and diversification of natural product-inspired hydantoin-fused tetrahydroazepino indoles
Source: Royal Society of Chemistry journal article supplement (doi:10.1039/c5ra12063b), 2015-01-01
Supplement: c5ra12063b1.pdf [file c5ra12063b1.pdf]

# Supporting Information

## Design, Synthesis and Diversification of Natural Product-Inspired Hydantoin-Fused Tetrahydroazepino Indoles

Indrajeet J. Barve,<sup>1</sup> Prashant B. Dalvi,<sup>1</sup> Tushar U. Thikekar,<sup>1</sup> Kaushik Chanda,<sup>1</sup> Yu-Li Liu,<sup>3</sup> Chiu-Ping Fang,<sup>3</sup> Chia-Chen Liu,<sup>3</sup> and Chung-Ming Sun<sup>1,2\*</sup>

<sup>1</sup>*Department of Applied Chemistry, National Chiao Tung University, Hsinchu 300-10, Taiwan*

<sup>2</sup>*Department of Medicinal and Applied Chemistry, Kaohsiung Medical University, 100, Shih-Chuan 1<sup>st</sup> Road, Kaohsiung 807-08, Taiwan*

<sup>3</sup>*Center for Neuropsychiatric Research, National Health Research Institutes, Miaoli, Taiwan*

Email: cmsun@mail.nctu.edu.tw

### Table of contents

|                                                                             |        |
|-----------------------------------------------------------------------------|--------|
| I. The Role of N-methyl-D-aspartic acid (NMDA) receptor in schizophrenia... | S3-6   |
| II. DAO enzymatic assay.....                                                | S7-9   |
| III. The inhibition screening of compounds on porcine kidney DAO.....       | S10    |
| IV. The IC50 of compounds on porcine kidney DAO.....                        | S11    |
| V. Concentration–inhibition curves.....                                     | S11    |
| VI. The inhibition mechanism of compound <b>5</b> on porcine kidney DAO...  | S12-13 |

|                                                                                                                                         |          |
|-----------------------------------------------------------------------------------------------------------------------------------------|----------|
| VII. <sup>1</sup> H NMR, <sup>13</sup> C NMR, LRMS, HRMS, IR spectra and HPLCs for compound <b>4</b> , <b>5</b> ,<br><b>7a-7s</b> ..... | S14-S146 |
| VIII. X-ray crystal data for compound <b>5</b> .....                                                                                    | S147-159 |
| IX. X-ray crystal data for compound <b>7b</b> .....                                                                                     | S160-168 |
| X. X-ray crystal data for compound <b>7r</b> .....                                                                                      | S169-179 |

## **I The Role of N-methyl-D-aspartic acid (NMDA) receptor in schizophrenia**

The aberrant regulatory mechanism of glutamate transmission on N-methyl-D-aspartic acid (NMDA) receptor has been reported as one of the neuropathology in schizophrenia.<sup>1</sup> The receptor is a heterotetramer composed of two structure subunits of NMDA receptor 1 (NR1) and NR2.<sup>2</sup> The extracellular domain of these two subunits were responsible for modulatory and ligand binding functions, where the NR1 binds the co-agonist glycine, and the NR2 binds the neurotransmitter glutamate. The membrane channel domain is responsible for the entrance of calcium ion. The receptor requires the binding of glutamate from NR2 subunit to activate the receptor, and requires the co-agonist of glycine binding for the efficient opening of the ion channel.<sup>3</sup> Modulation the glycine binding site of NMDA receptor may improve cognitive function and negative symptoms in schizophrenia.<sup>4</sup> D-amino acid oxidase (DAO) was found to be involved in the activation process of the NMDA receptor.<sup>5</sup> The substrates of DAO, especially the D-amino acid of D-serine, may bind the glycine site of the NMDA receptor as a co-agonist.<sup>6,7</sup> This in turn may regulate the NMDA receptor in opening its calcium channel. Moreover,

D-serine has also been found to inhibit the  $\alpha$ -amino-3-hydroxy-5-methyl-4-isoxazole propionic acid (AMPA) receptor-mediated current in rat hippocampus neurons.<sup>8</sup> Thus, DAO may play role in the pathogenesis of schizophrenia.

D-serine is a full agonist at the allosteric glycine binding site of the NMDA receptor, and was reported to improve negative, cognitive symptoms, and symptoms poorly addressed by the standard D2 antagonist in schizophrenia.<sup>9</sup> Inhibition of DAO became essential to increase D-serine levels in the brain. The DAOI does not seem to be used alone in the treatment of schizophrenia, a meta-analysis evaluating the potential of modulators of the NMDA receptor as adjunctive therapy for schizophrenia in 29 published clinical trials was reported that D-serine, glycine structure analogue of mucolytic agent N-acetyl-cysteine (NAC) and glycine transporter inhibitor sarcosine as adjuncts to non-clozapine antipsychotics may benefit the treatment of negative and total symptoms of chronic schizophrenia.<sup>10</sup> In our ethnic group, the glycine transporter inhibitor sarcosine has been reported with better adjunctive than D-serine for long-term stable schizophrenia and acute schizophrenia<sup>11</sup>, and high dose may be essential for acute schizophrenia.<sup>12</sup> D-alanine may be a



better adjunctive.<sup>13</sup> These results suggest indirect NMDA glycine site treatment may be better than direct full agonist, especially in our population.

Sodium benzoate is a bacteriostatic and fungistatic food preservative. It is a safe and easy to obtain DAO inhibitor. It was put in a clinical trial with doses of above 1g and showed beneficial results in the treatment of schizophrenia.<sup>14</sup> Although in the short term up to six weeks of clinical trial, it did not showed toxic effects. However, it has been reported that sodium benzoate under the combination with ascorbic acid (vitamin C) may form benzene, a known carcinogen (<http://www.fda.gov/Food/FoodSafety/FoodContaminantsAdulteration/ChemicalContaminants/Benzene/ucm055815.htm>). The Food Standards Agency (FSA) at United Kingdom even suggested that sodium benzoate combining with certain artificial colors may be linked to hyperactivity behavior

(<http://www.myomancy.com/2007/09/food-colorings-and-hyperactivity/>).

This indicates that DAOI better than sodium benzoate is essential to meet the treatment need.

## References:

- (1) Field, J. R.; Walker, A. G.; Conn, P. J. *Trends Mol. Med.* **2011**, *17*, 689-98.
- (2) Paoletti, P.; Neyton, J. *Curr. Opin. Pharmacol.* **2007**, *7*, 39-47.
- (3) Kleckner, N. W.; Dingledine, R. *Science*, **1988**, *241*, 835-7.
- (4) Coyle, J. T.; Tsai, G. *Psychopharmacology*, **2004**, *174*, 32-8.
- (5) Schell, M. J. *Philosophical Transactions of the Royal Society of London. Series B: Biological Sciences*, **2004**, *359*, 943-64.
- (6) Shleper, M.; Kartvelishvily, E.; Wolosker, H. *The Journal of Neuroscience*, **2005**, *25*, 9413-7.
- (7) Mothet, J. P. *Proceedings of the National Academy of Sciences of the United States of America*, **2000**, *97*, 4926-31.
- (8) Gong, X. Q.; Zabek, R. L.; Bai, D. *Canadian Journal of Physiology and Pharmacology*, **2007**, *85*, 546-55.
- (9) Ferraris, D. V.; Tsukamoto, T. *Curr. Pharm. Des.* **2011**, *17*, 103-11.
- (10) Singh, S. P.; Singh, V. *CNS Drugs*, **2011**, *25*, 859-85.
- (11) Lane, H. Y. *Arch. Gen. Psychiatry*, **2005**, *62*, 1196-204.
- (12) Lane, H. Y. *Biol. Psychiatry*, **2008**, *63*, 9-12.

(13) Tsai, G. E. *Biol. Psychiatry*, **2006**, *59*, 230-4.

(14) Lane, H. Y. *JAMA Psychiatry*, **2013**, *70*, 1267-75.

**II. DAO enzymatic assay.** Porcine kidney DAO (pkDAO) was used in the DAO enzymatic assay. A purified DAO enzyme was obtained from porcine kidney (Sigma-Aldrich, USA). The DAO enzymatic activity assay was modified as specified by Oguri *et al.*<sup>1</sup> DAO activity was measured by using substrate *D*-alanine reaction-produced hydrogen peroxide (H<sub>2</sub>O<sub>2</sub>) to further react with 3-(4-hydroxyphenyl) propionic acid (HPPA). HPPA was oxidized by H<sub>2</sub>O<sub>2</sub> and peroxidase to become the fluorogenic dimer measured to represent DAO activity. For porcine kidney DAO, the DAO substrate was prepared in 50 mM *D*-alanine (dissolved in 0.2 M Tris-HCl buffer, pH 8.3). A 100 ul of *D*-alanine solution was mixed with 4 ul (in 100%) dimethyl sulfoxide, DMSO) of different concentrations of candidate compounds ranging from 12.21 uM, 24.41 uM, 48.83 μM, 97.66 μM, 195.31 μM, 390.63 μM, 0.78 mM, 1.56 mM, 3.13 mM, 6.25 mM, 12.50 mM, and 25.00 mM. Ten microliters of *D*-alanine and candidate compound mixture was incubated with 220 ul of Reaction Master Mix in black 96 well plate at 37°C for 5 min. The

Reaction Master Mix contained 110  $\mu$ L of 5 U/mL porcine kidney DAO (Sigma-Aldrich, USA) solution (dissolved with 0.2 M Tris-HCl buffer, pH 8.3), 1.1 mL of 15 U/mL peroxidase solution (dissolved with 0.2 M Tris-HCl buffer, pH 8.3), 1.1 mL of 20 mM HPPA solution (dissolved with 0.2 M Tris-HCl buffer, pH 8.3), and 2.2 mL of 2 M Tris-HCl buffer (pH 8.3) for 110 reaction assays.

Fluorescence intensity ( $F_s$ ) was measured at 405 nm by irradiation excitation at 320 nm. The higher the DAO enzymatic activity was, the higher the fluorescence intensity. The fluorometric inhibition indicator ( $F_i$ ) was obtained from the following equation:  $F_i = (F_s - F_{Drug}) / (F_{DMSO})$ , where the fluorescent drug blank ( $F_{Drug}$ ) was measured in the drug mixture solution (using 0.2 M Tris HCl buffer, pH 8.3, without *D*-alanine). A DMSO blank ( $F_{DMSO}$ ) was measured under a 100% DMSO solution. Although FAD is generally included in the reaction mixture in the *D*-amino acid oxidase assay since it easily dissociates from the holoenzyme, the present method was performed without FAD. The inhibitory effect of DAO inhibitors was compared by using inhibitory concentrations leading to 50% inhibition of DAO activity ( $IC_{50}$ ). For inhibitory constant ( $K_i$ ) estimation, seven different final concentrations of

substrate *D*-alanine, ranging from 522.6, 1045.2, 2090.3, 4180.6, 8361.2, 16722.4, and 33444.8  $\mu\text{M}$ , were incubated with 3 drug concentrations of compound. The  $\text{IC}_{50}$  and inhibitory constant ( $K_i$ ) were calculated by nonlinear regression model using GraphPad Prism, version 5 (GraphPad Software, Inc., La Jolla, CA).<sup>2,3</sup>

In this study, hydantoin fused tetrahydroazepino [4,5-*b*]indoles derivatives were screened for their porcine DAO inhibitory effects. Compound **5** had shown the strongest DAOI effect with  $\text{IC}_{50}$  of  $4.5 \pm 1.04 \mu\text{M}$ . It showed competitive inhibitory effect with the DAO substrate of *D*-alanine. Further impact of compound **5** effect on the negative and cognitive symptoms of schizophrenia animal analyses is essential to confirm for its role as a novel antipsychotics.

### References:

- (1) Oguri, S. *Food chemistry*, **2007**, *100*, 616-622.
- (2) Halgren, T. A. *Journal of Computational Chemistry*, **1996**, *17*, 490-519.
- (3) Shleper, M.; Kartvelishvily, E.; Wolosker, H. *The Journal of Neuroscience*, **2005**, *25*, 9413-7.

**Table 1.** The inhibition screening of compounds on porcine kidney DAO (pkDAO).

| Compound | M.W.   | Screening at final Conc. 20.8 uM |             |
|----------|--------|----------------------------------|-------------|
|          |        | DMSO = 1                         | Na-Benz = 1 |
| 7a       | 381.42 | 0.89                             | 0.95        |
| 7b       | 435.85 | 0.91                             | 0.97        |
| 7c       | 447.5  | 0.72                             | 0.77        |
| 7d       | 413.49 | 0.76                             | 0.80        |
| 7e       | 446.41 | 0.63                             | 0.67        |
| 7f       | 462.47 | 0.68                             | 0.72        |
| 7g       | 383.46 | 0.76                             | 0.80        |
| 7h       | 431.5  | 0.84                             | 0.90        |
| 7i       | 582.55 | 0.65                             | 0.69        |
| 7j       | 393.43 | 0.62                             | 0.66        |
| 7k       | 355.41 | 0.88                             | 0.94        |
| 7l       | 409.5  | 0.67                             | 0.71        |
| 7m       | 431.5  | 0.77                             | 0.81        |
| 7n       | 417.48 | 0.71                             | 0.75        |
| 7o       | 407.46 | 0.93                             | 0.98        |
| 7p       | 431.44 | 0.88                             | 0.93        |
| 7q       | 383.46 | 0.58                             | 0.61        |
| 7r       | 445.53 | 0.88                             | 0.95        |
| 7s       | 423.52 | 0.59                             | 0.62        |
| 5        | 314.33 | 0.09                             | 0.10        |

**Table 2.** The IC<sub>50</sub> of compounds on porcine kidney DAO (pkDAO).

| Compound | pkDAO (uM)       |   |       |
|----------|------------------|---|-------|
|          | IC <sub>50</sub> | ± | SEM   |
| 7l       | 20.406           | ± | 1.057 |
| 5        | 4.460            | ± | 1.036 |
| 7s       | 35.519           | ± | 1.050 |
| 7i       | 25.783           | ± | 1.046 |
| 7e       | 30.539           | ± | 1.072 |
| 7j       | 29.029           | ± | 1.045 |
| 7q       | 26.679           | ± | 1.061 |

**Figure 1. Concentration–inhibition curves.** For compounds with porcine kidney DAO IC<sub>50</sub> values, inhibition curves are shown. Compound No. are listed on the right. (each data point represented an average ± triplicates of standard error mean; SEM)

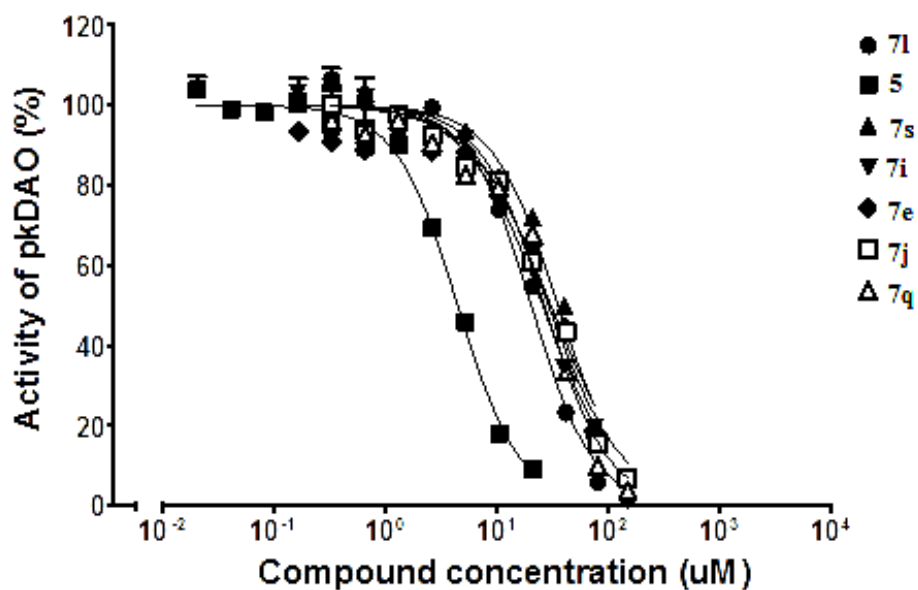

**Figure 2.** The inhibition mechanism of compound **5** on porcine kidney DAO was determined through (a) Michaelis-Menten and (b) Lineweaver-Burk diagram of *D*-alanine substrate competition. The absence (dotted line) or presence of compound **5** at concentrations of 2  $\mu\text{M}$  (grey), 4  $\mu\text{M}$  (black) and 8  $\mu\text{M}$  (dotted) are presented. The percentage velocity data were normalized to the highest substrate [*D*-Ala] concentration of 33444.8  $\mu\text{M}$  in the absence of inhibitor. (each data point represented an average  $\pm$  triplicates of standard error mean; SEM)

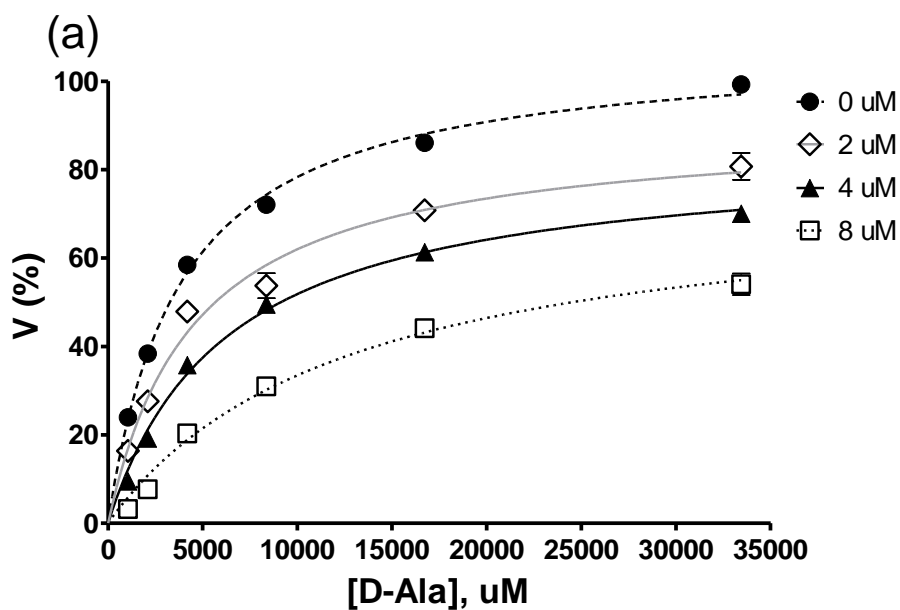



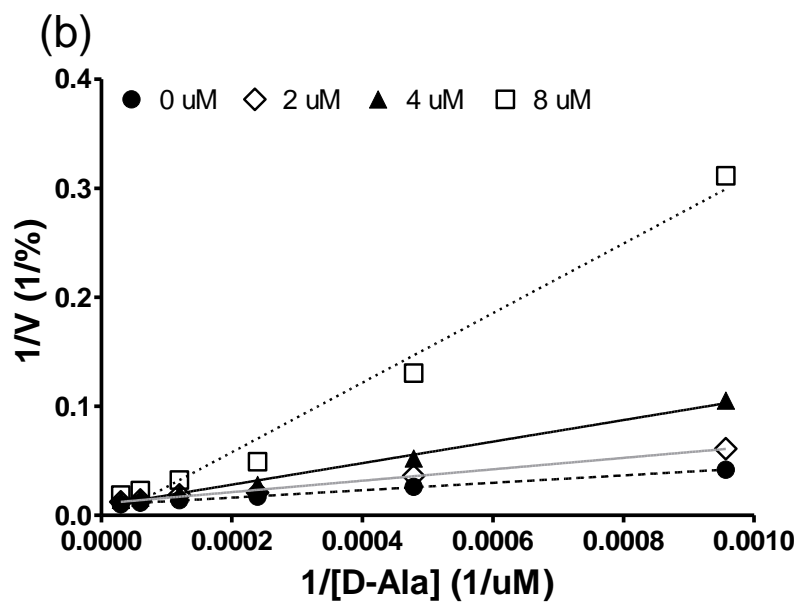

## VII. $^1\text{H}$ NMR, $^{13}\text{C}$ NMR, LRMS, HRMS, IR spectra and HPLCs

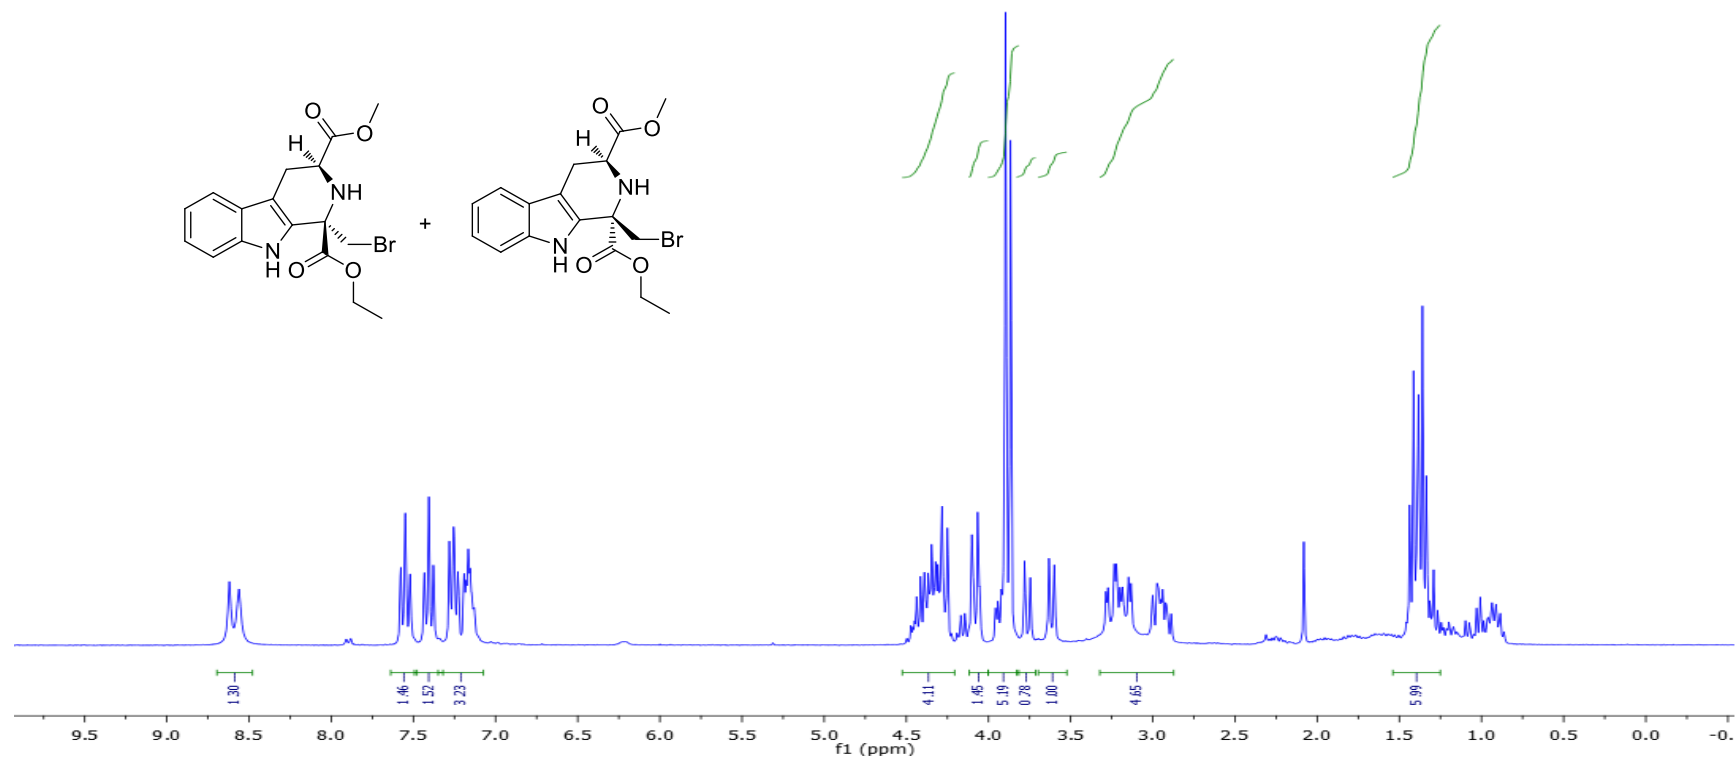

$^1\text{H}$  NMR spectrum (300 MHz) of compound **4** (Diastereomeric mixture) in  $\text{Acetone-d}_6$

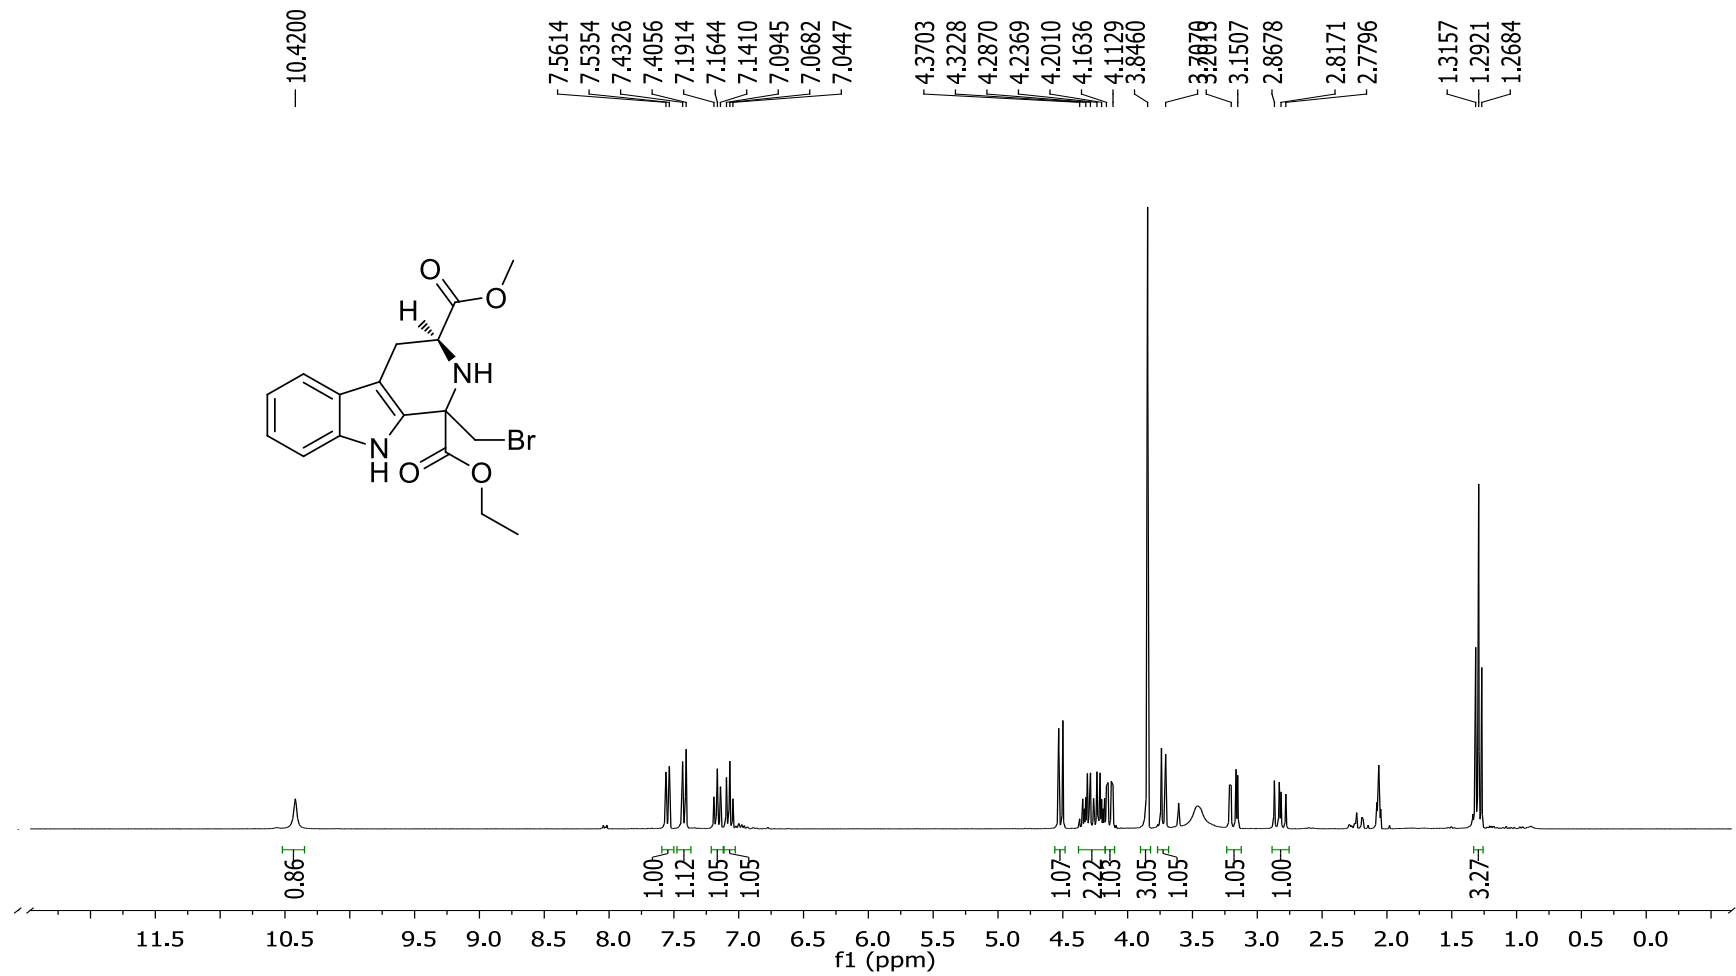

<sup>1</sup>H NMR spectrum (300 MHz) of compound 4 (Single diastereomer) in Acetone-d<sub>6</sub>

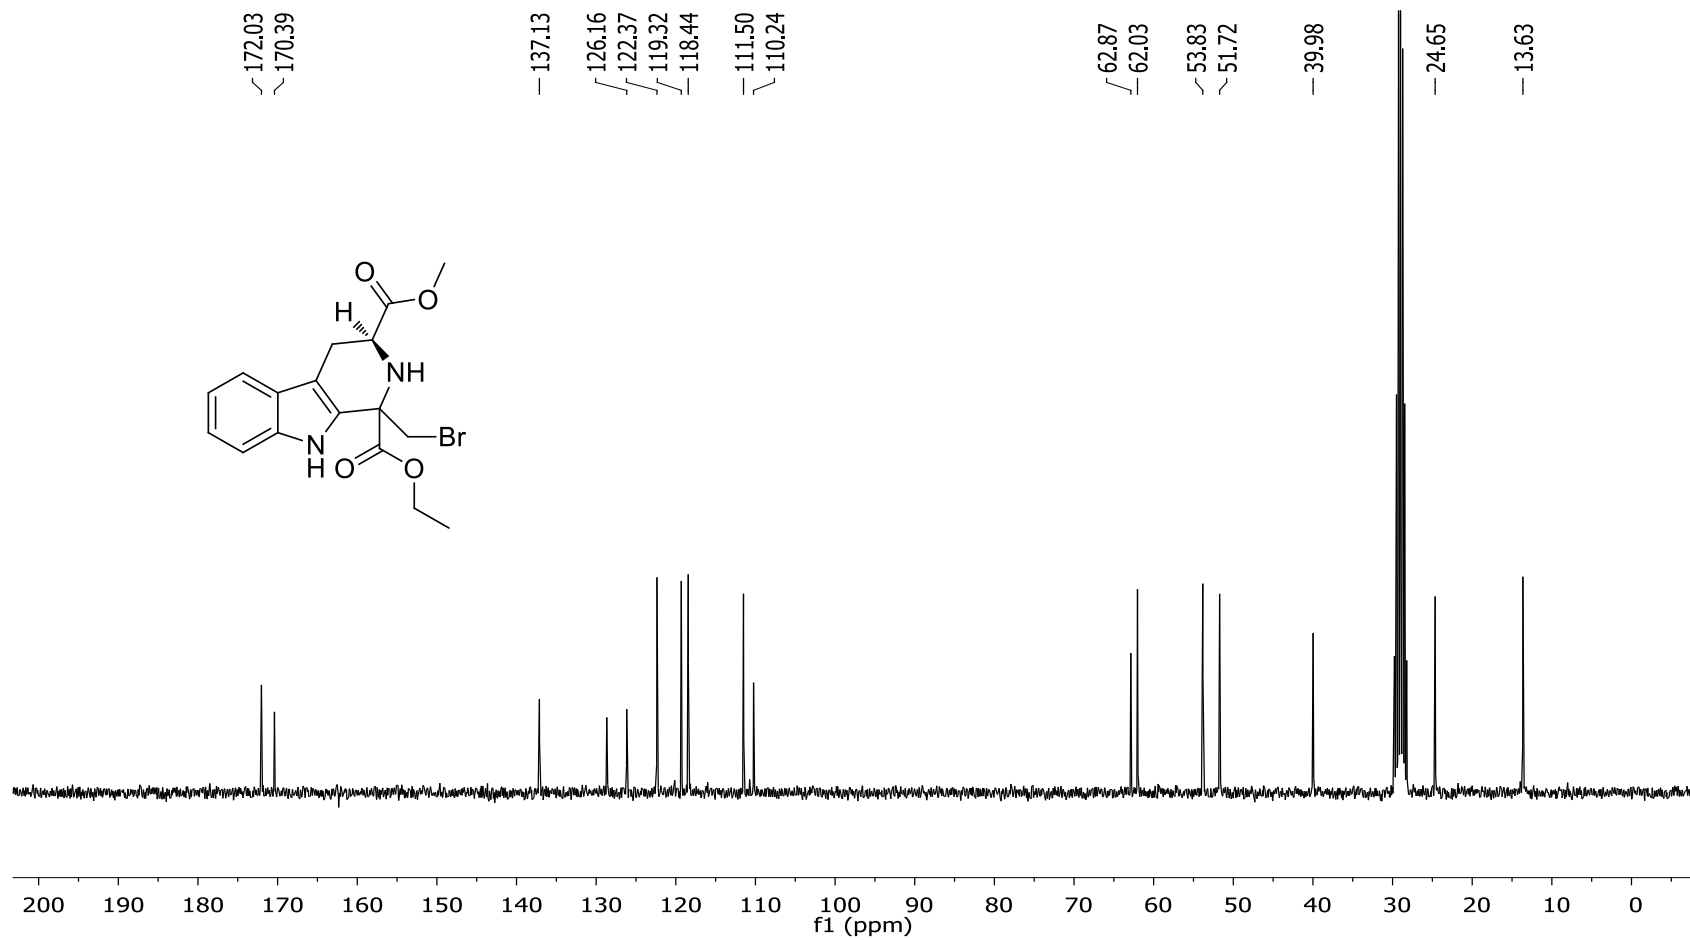

$^{13}\text{C}$  NMR spectrum (75 MHz) of compound **4** (single diastereomer) in Acetone- $\text{d}_6$

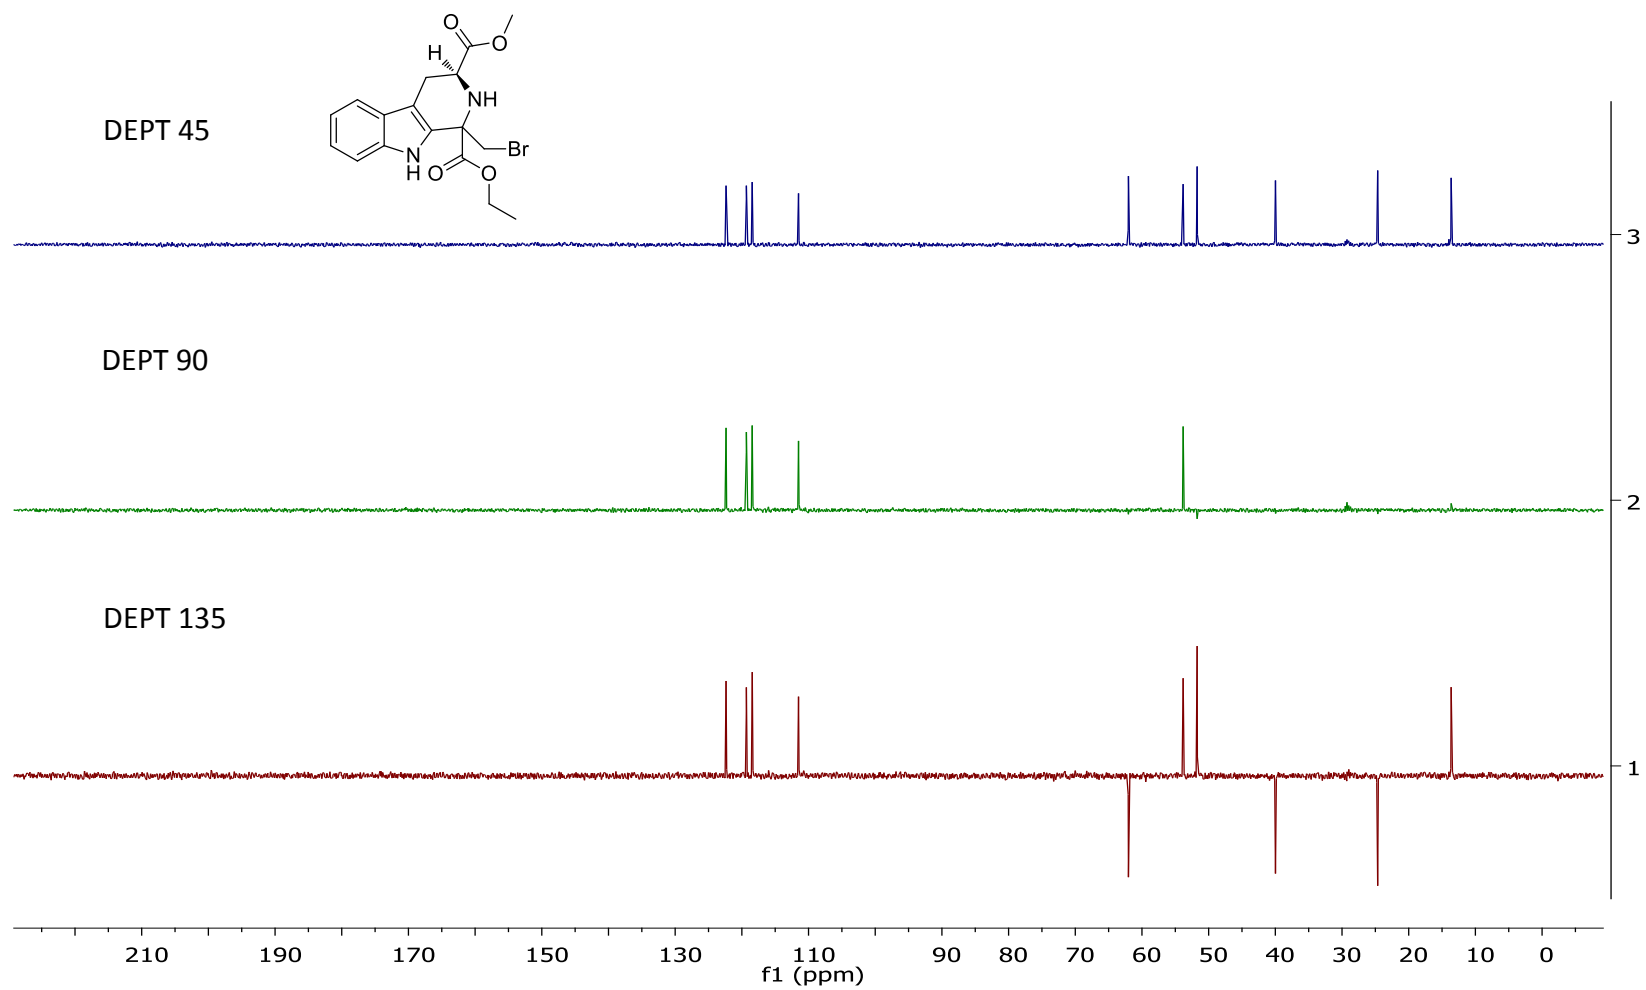

DEPT NMR spectrum (75 MHz) of compound **4** (single diastereomer) in Acetone- $d_6$

PD-N3-O4

20131018029 24 (0.844) Cn (Cen,2, 80.00, Ht); Sm (Mn, 2x0.75); Sb (3.60.00 ); Cm (15:31-2:8x3.000)

Scan ES+  
1.02e8

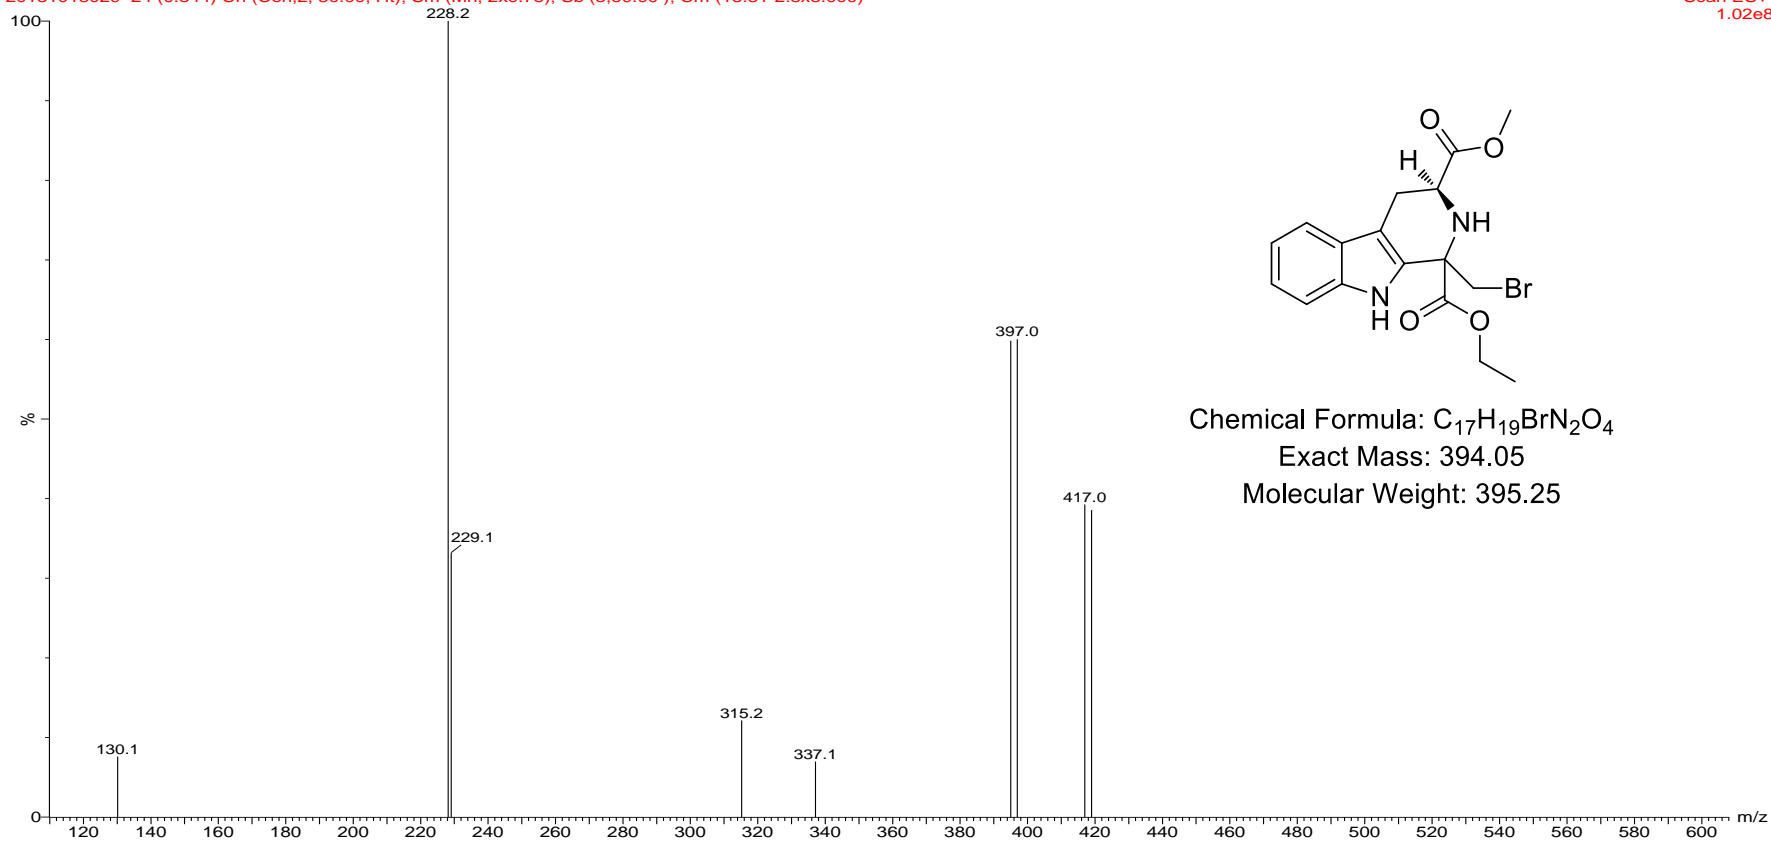

ESI-LRMS of compound **4** (single diastereomer)

## Display Report

### Analysis Info

Analysis Name D:\Data\ncu service\data\2015\20150721\ib-N7-052 394 ESI+\_RA4\_01\_6901.d  
Method Small molecule.m  
Sample Name ib-N7-052 394 ESI+  
Comment

Acquisition Date 7/21/2015 1:50:51 PM

Operator NCTU

Instrument impact HD 1819696.00164

### Acquisition Parameter

|             |          |                      |          |                  |           |
|-------------|----------|----------------------|----------|------------------|-----------|
| Source Type | ESI      | Ion Polarity         | Positive | Set Nebulizer    | 1.0 Bar   |
| Focus       | Active   | Set Capillary        | 4500 V   | Set Dry Heater   | 200 °C    |
| Scan Begin  | 50 m/z   | Set End Plate Offset | -500 V   | Set Dry Gas      | 6.0 l/min |
| Scan End    | 1500 m/z | Set Charging Voltage | 2000 V   | Set Divert Valve | Waste     |
|             |          | Set Corona           | 0 nA     | Set APCI Heater  | 0 °C      |

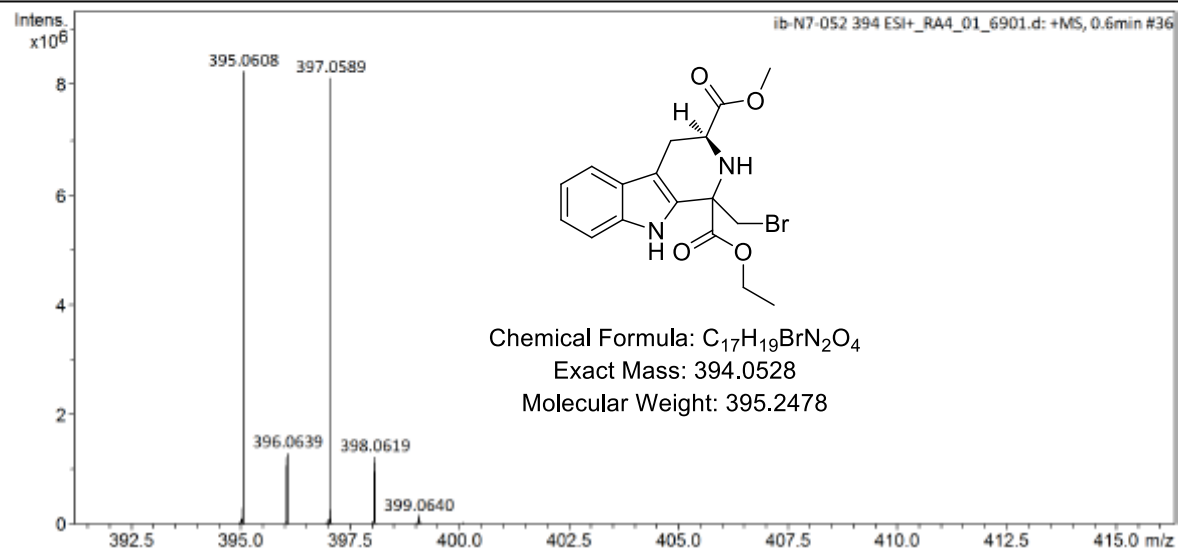

ESI-HRMS of compound **4** (single diastereomer)

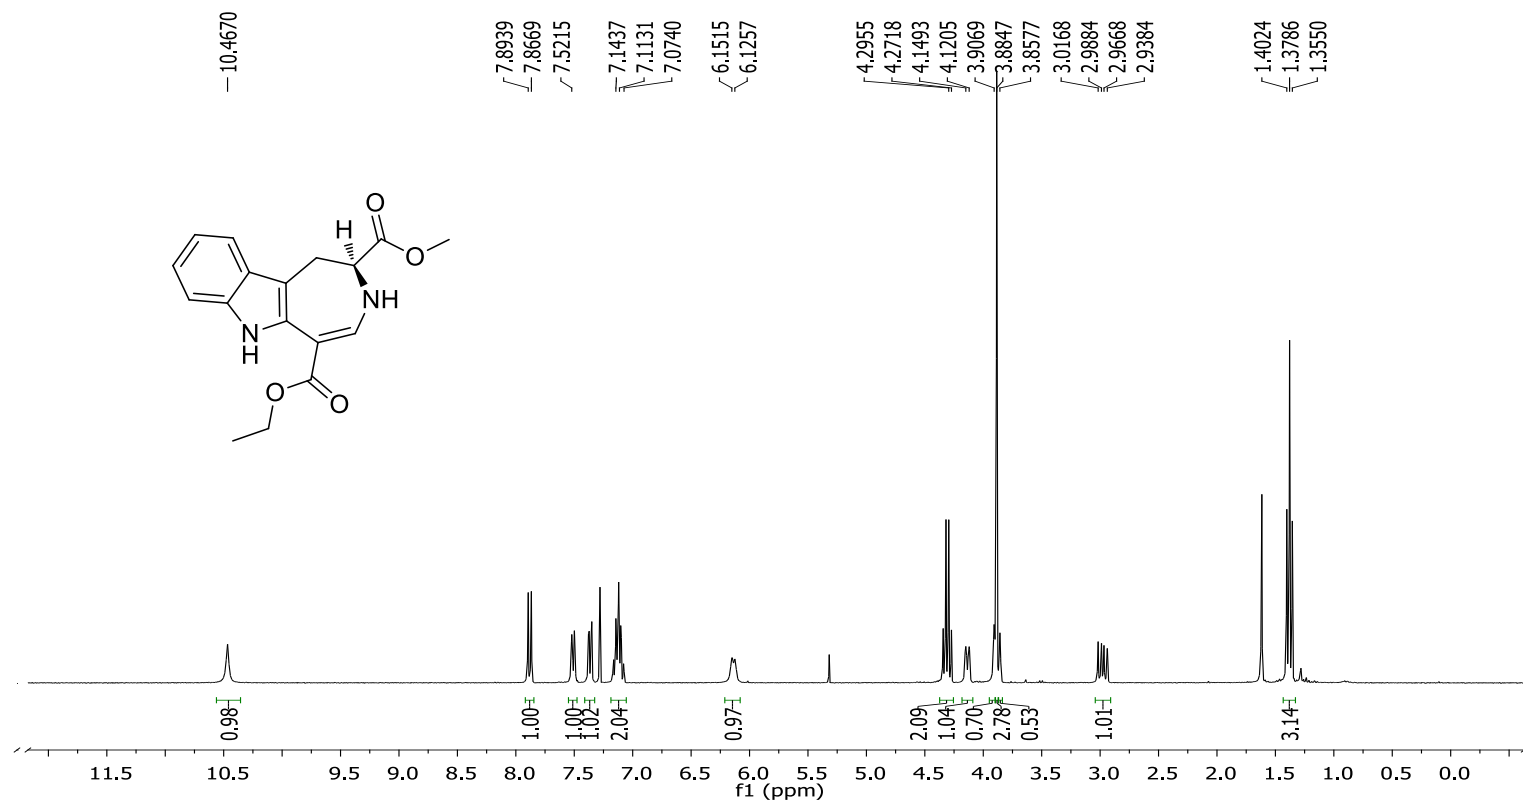

<sup>1</sup>H NMR spectrum (300 MHz) of compound 5 in CDCl<sub>3</sub>



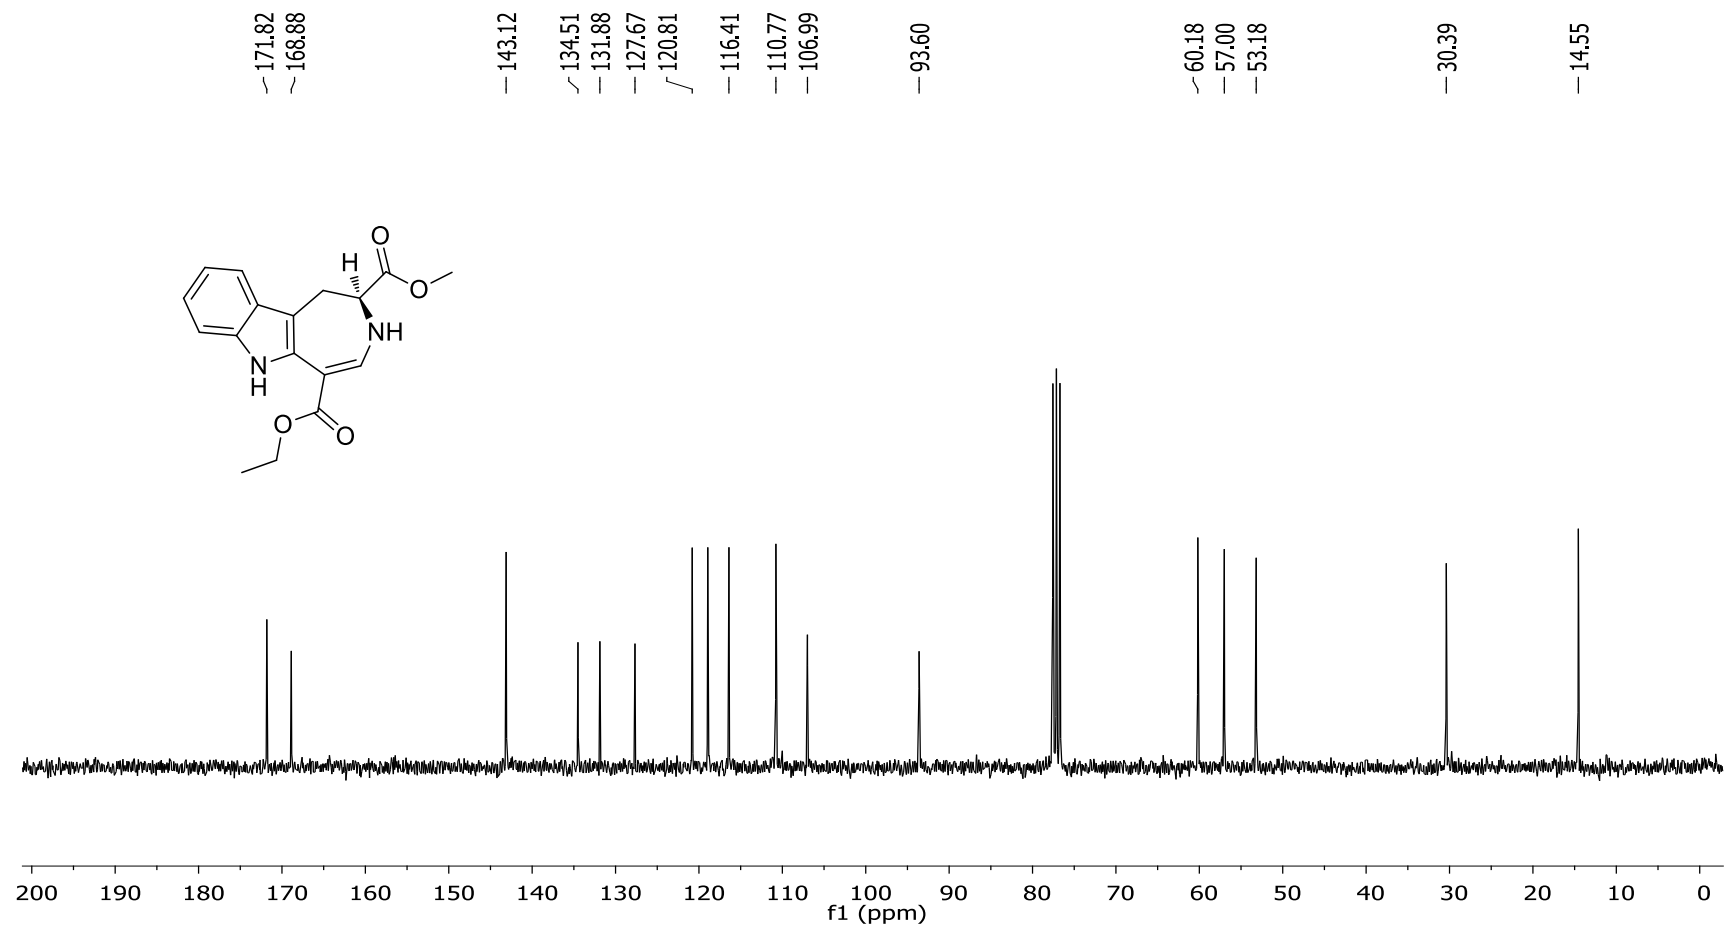

<sup>13</sup>C NMR spectrum (75 MHz) of compound **5** in CDCl<sub>3</sub>

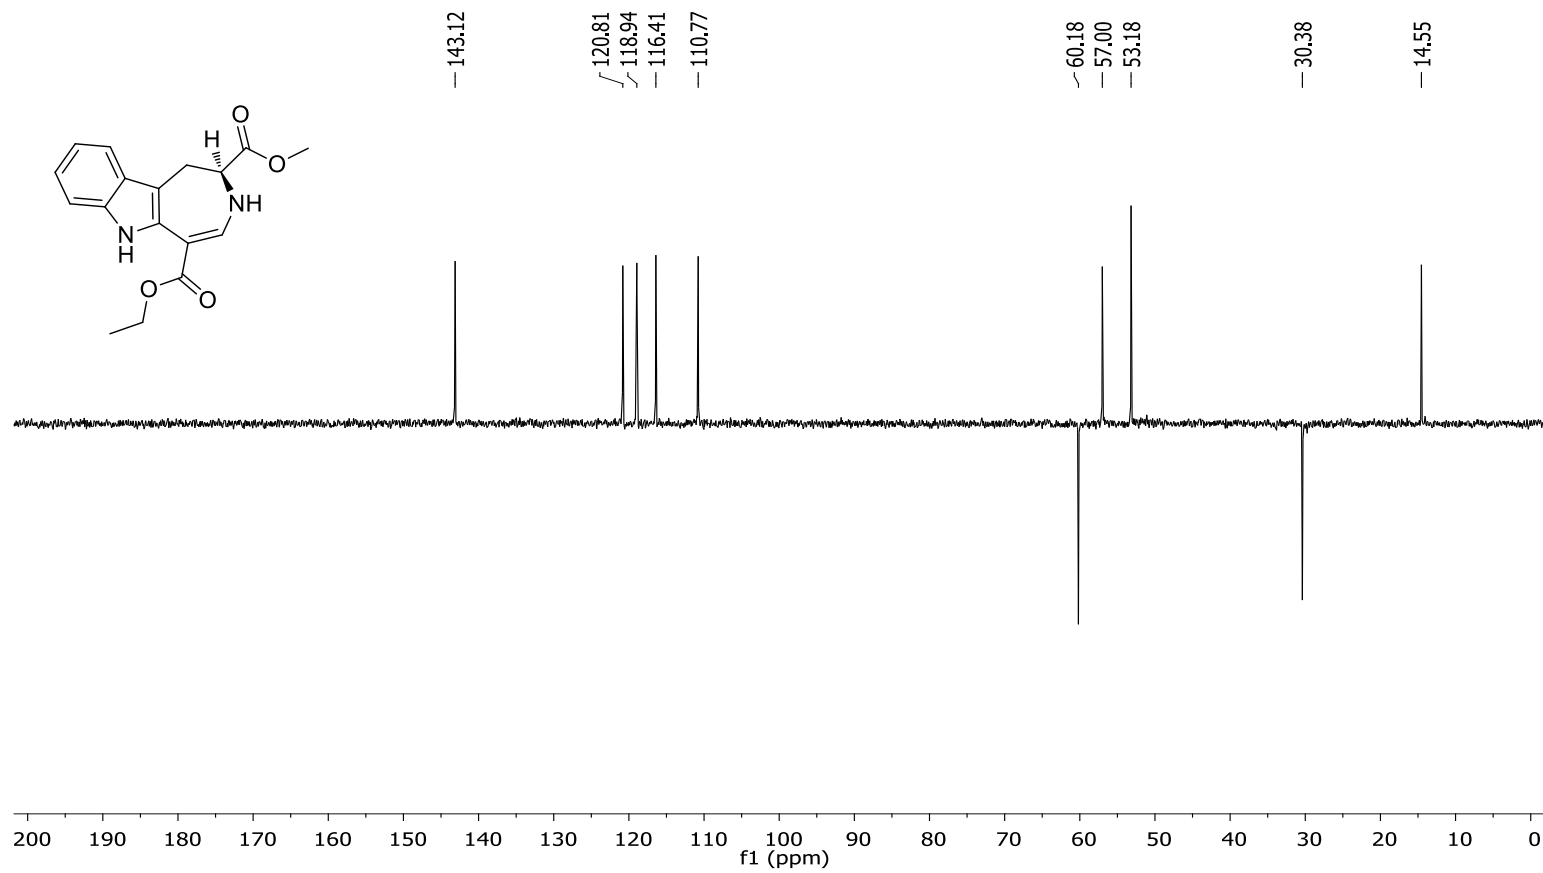

DEPT NMR spectrum (75 MHz) of compound 5 in CDCl<sub>3</sub>

PD-N4-O5

20131018034 29 (1.020) Cn (Cen,2, 80.00, Ht); Sm (Mn, 2x0.75); Sb (3,60.00); Cm (20:31-2:13x3.000)

Scan ES+  
6.69e7

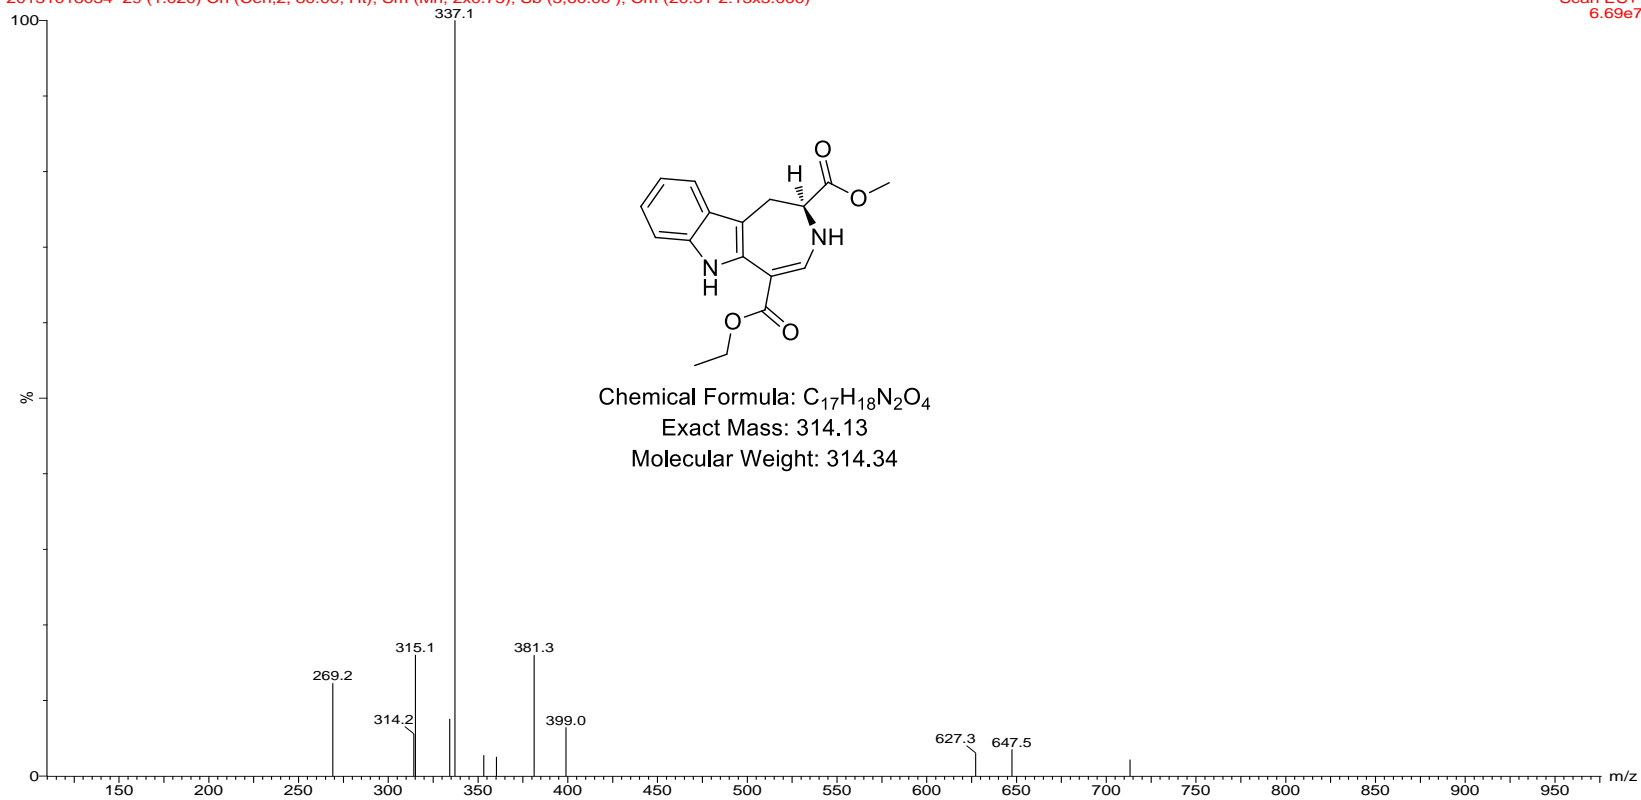

## ESI-LRMS of compound 5

9eihr-91-c1 #9 RT: 0,49 AV: 1 NL: 3,02E7  
T: + c EI Full ms [ 216,50-335,50]

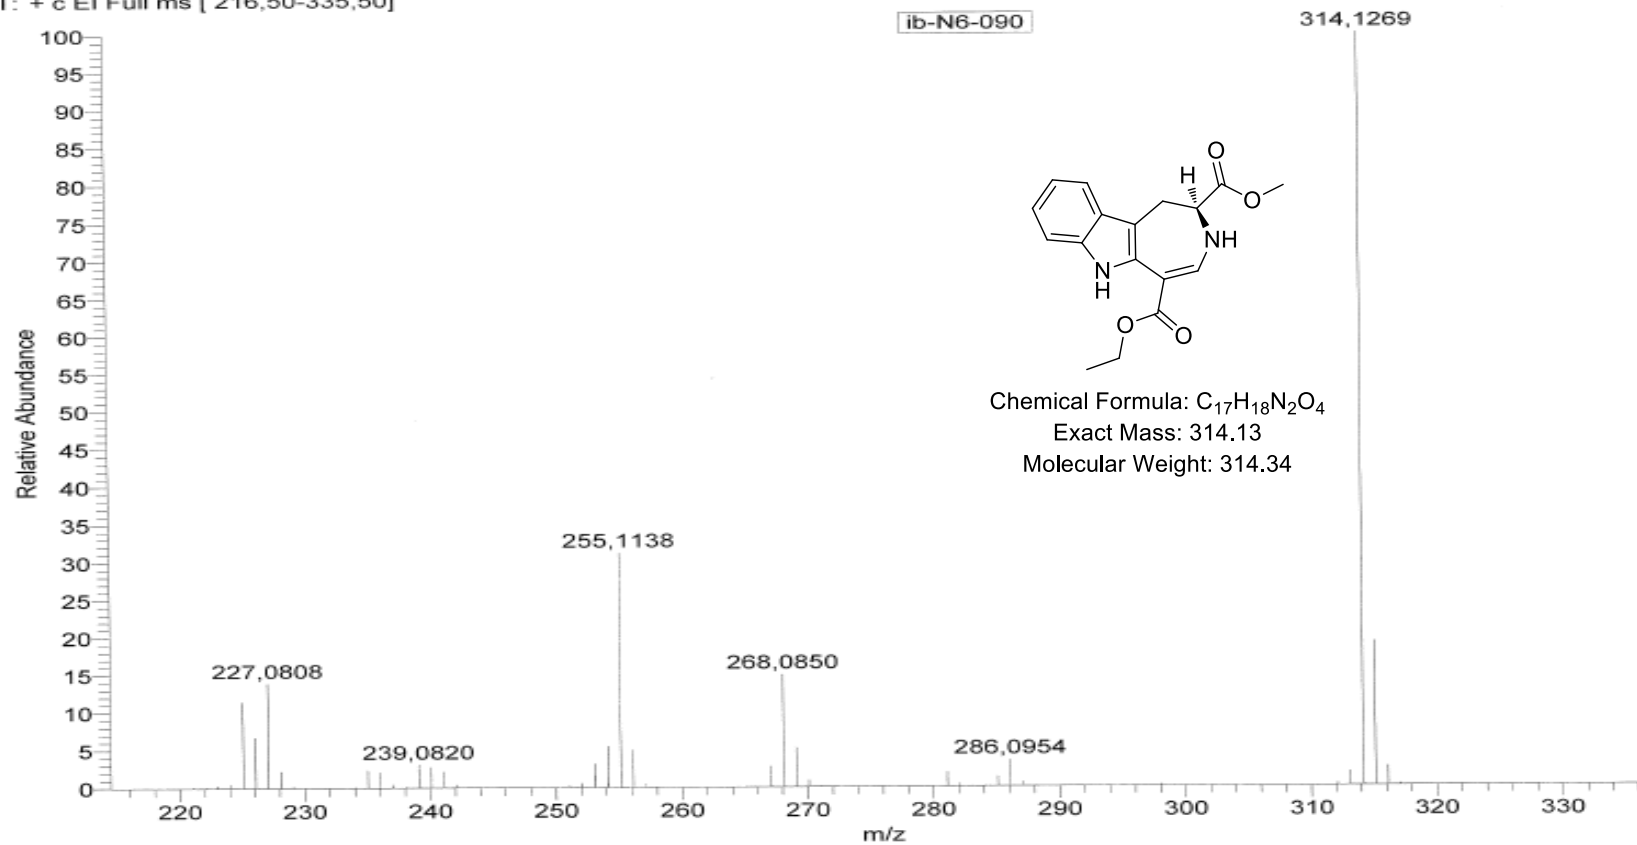

EI-HRMS of compound 5

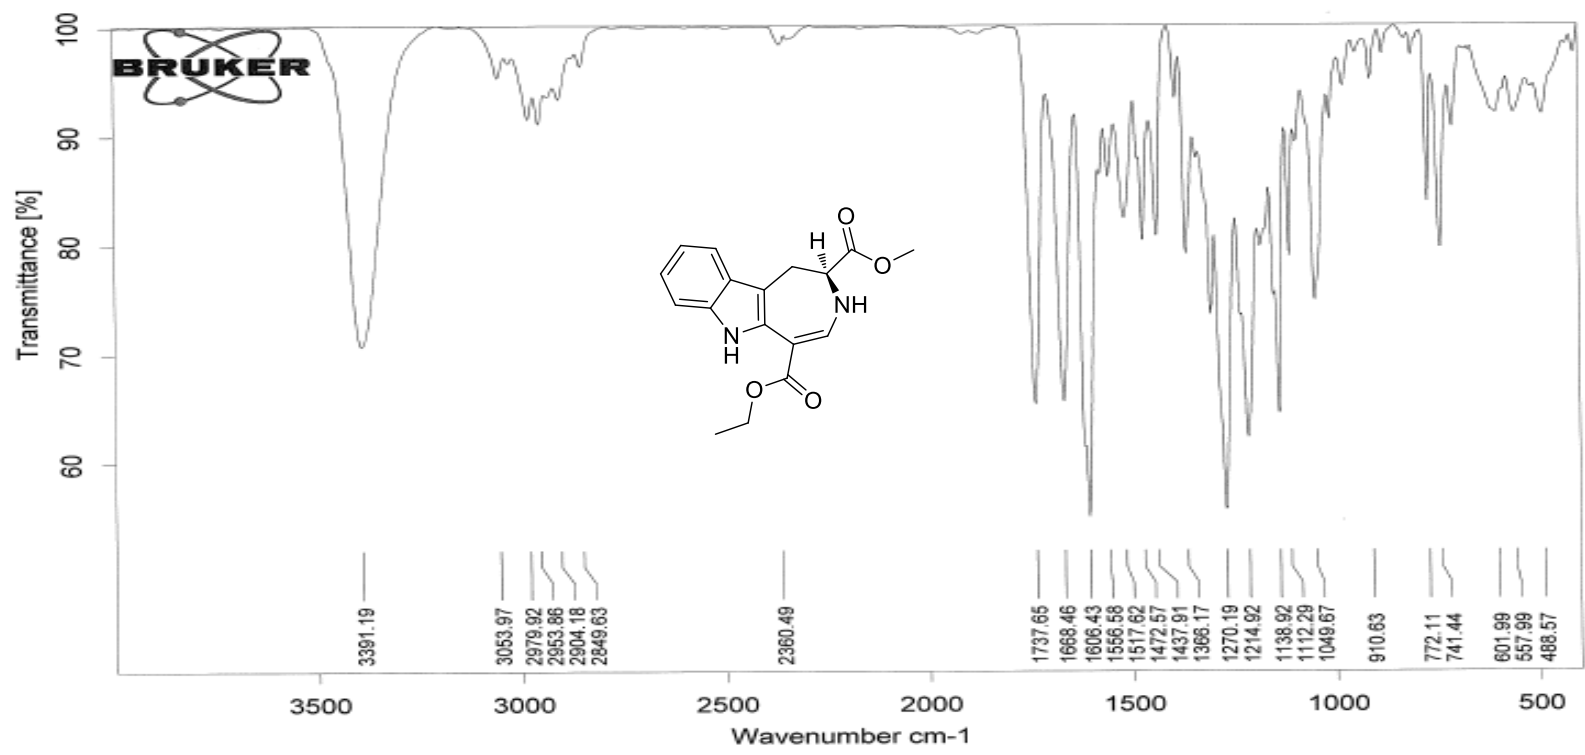

D:\temp-files\FTIR files\20140904\MIR\_TR\_DTGS\_blank KBr\_ib-N6-090.0      MIR\_TR\_DTGS\_blank KBr\_ib-N6-090      Instrument type and / o      2014/9/4

IR spectrum of compound 5

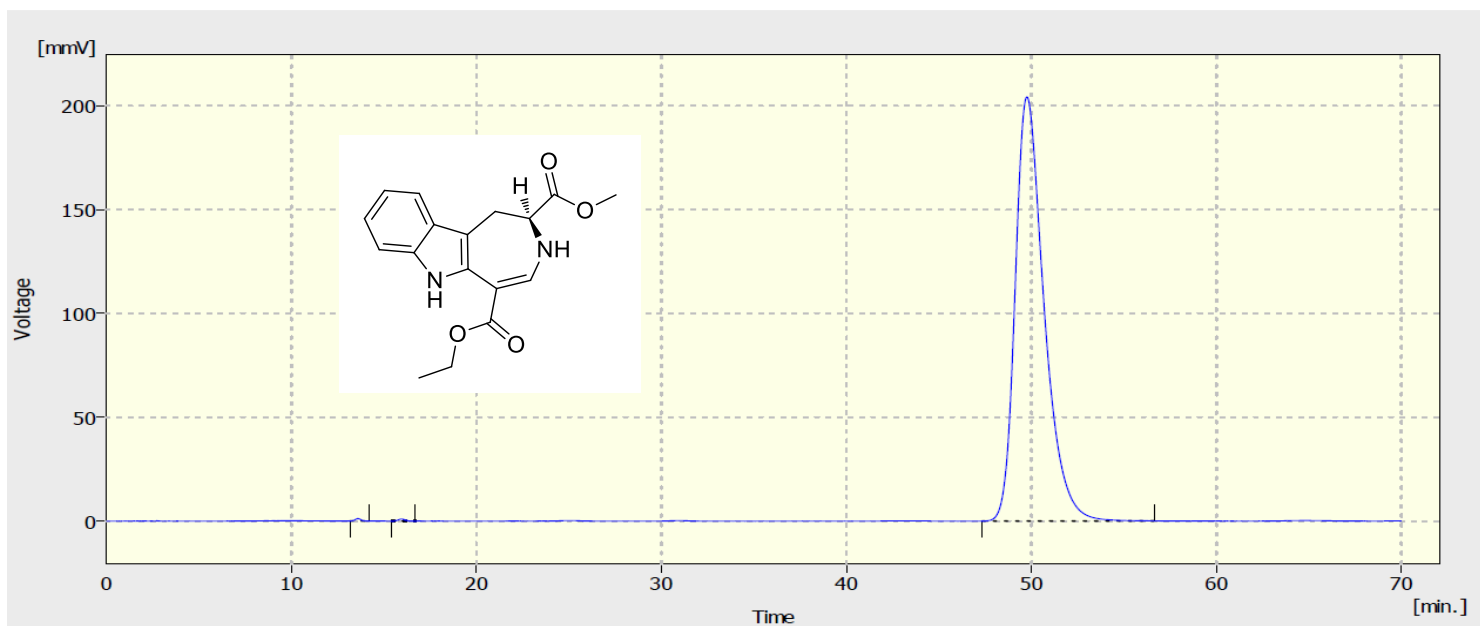

Result Table (Uncal - D:\PRASHANT HPLC PDF\PD-N4-L-19-02)

|   | Reten. Time [min] | Area [mV.s] | Height [mV] | Area [%] | Height [%] | W05 [min] |
|---|-------------------|-------------|-------------|----------|------------|-----------|
| 1 | 13.600            | 25.421      | 1.179       | 0.1      | 0.6        | 0.34      |
| 2 | 15.956            | 25.240      | 0.996       | 0.1      | 0.5        | 0.40      |
| 3 | 49.756            | 22114.626   | 204.143     | 99.8     | 98.9       | 1.62      |
|   | Total             | 22165.287   | 206.318     | 100.0    | 100.0      |           |

## HPLC of compound 5

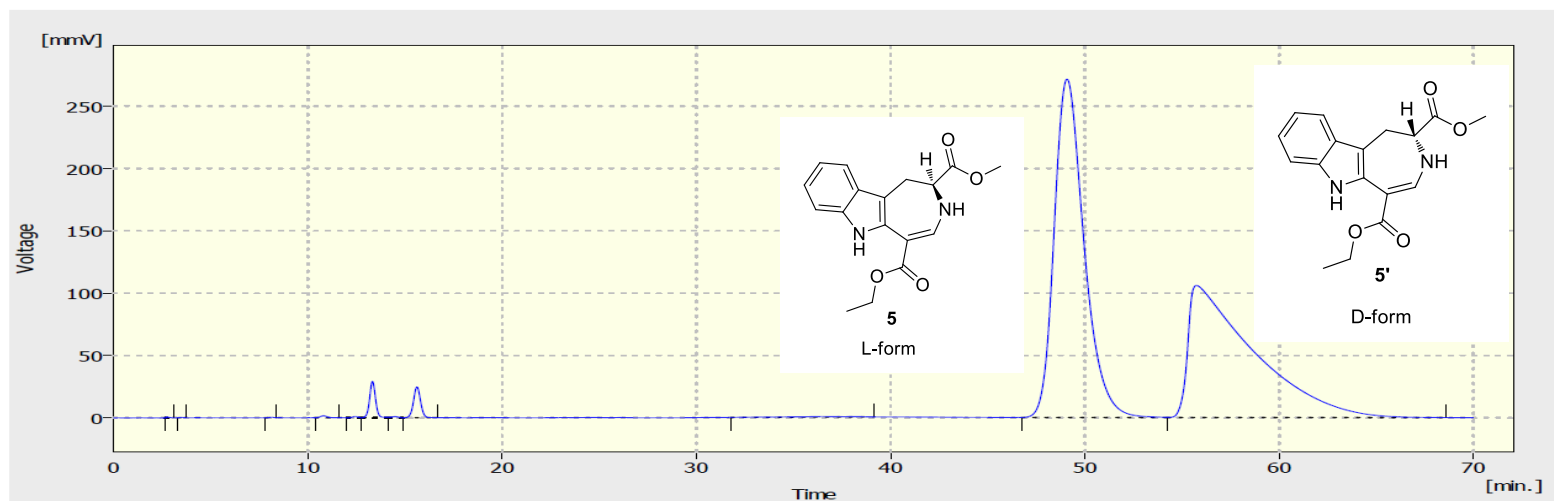

Result Table (Uncal - D:\PRASHANT HPLC PDF\PD-N4-DL-19-02)

|    | Reten. Time [min] | Area [mV.s] | Height [mV] | Area [%] | Height [%] | W05 [min] |
|----|-------------------|-------------|-------------|----------|------------|-----------|
| 1  | 2.748             | 6.931       | 0.716       | 0.0      | 0.2        | 0.16      |
| 2  | 3.508             | 3.477       | 0.309       | 0.0      | 0.1        | 0.18      |
| 3  | 8.148             | 5.337       | 0.384       | 0.0      | 0.1        | 0.22      |
| 4  | 10.804            | 37.284      | 1.594       | 0.1      | 0.4        | 0.36      |
| 5  | 12.448            | 19.945      | 1.020       | 0.0      | 0.2        | 0.31      |
| 6  | 13.320            | 624.902     | 29.212      | 1.1      | 6.7        | 0.32      |
| 7  | 14.488            | 21.752      | 0.901       | 0.0      | 0.2        | 0.39      |
| 8  | 15.612            | 623.842     | 24.709      | 1.1      | 5.7        | 0.39      |
| 9  | 36.688            | 99.581      | 0.409       | 0.2      | 0.1        | 3.32      |
| 10 | 49.076            | 28951.541   | 271.332     | 52.3     | 62.2       | 1.61      |
| 11 | 55.736            | 24919.613   | 105.959     | 45.1     | 24.3       | 3.42      |
|    | Total             | 55314.204   | 436.547     | 100.0    | 100.0      |           |

HPLC (co-injection) of compound **5** (L-form) and **5'** (D-form)

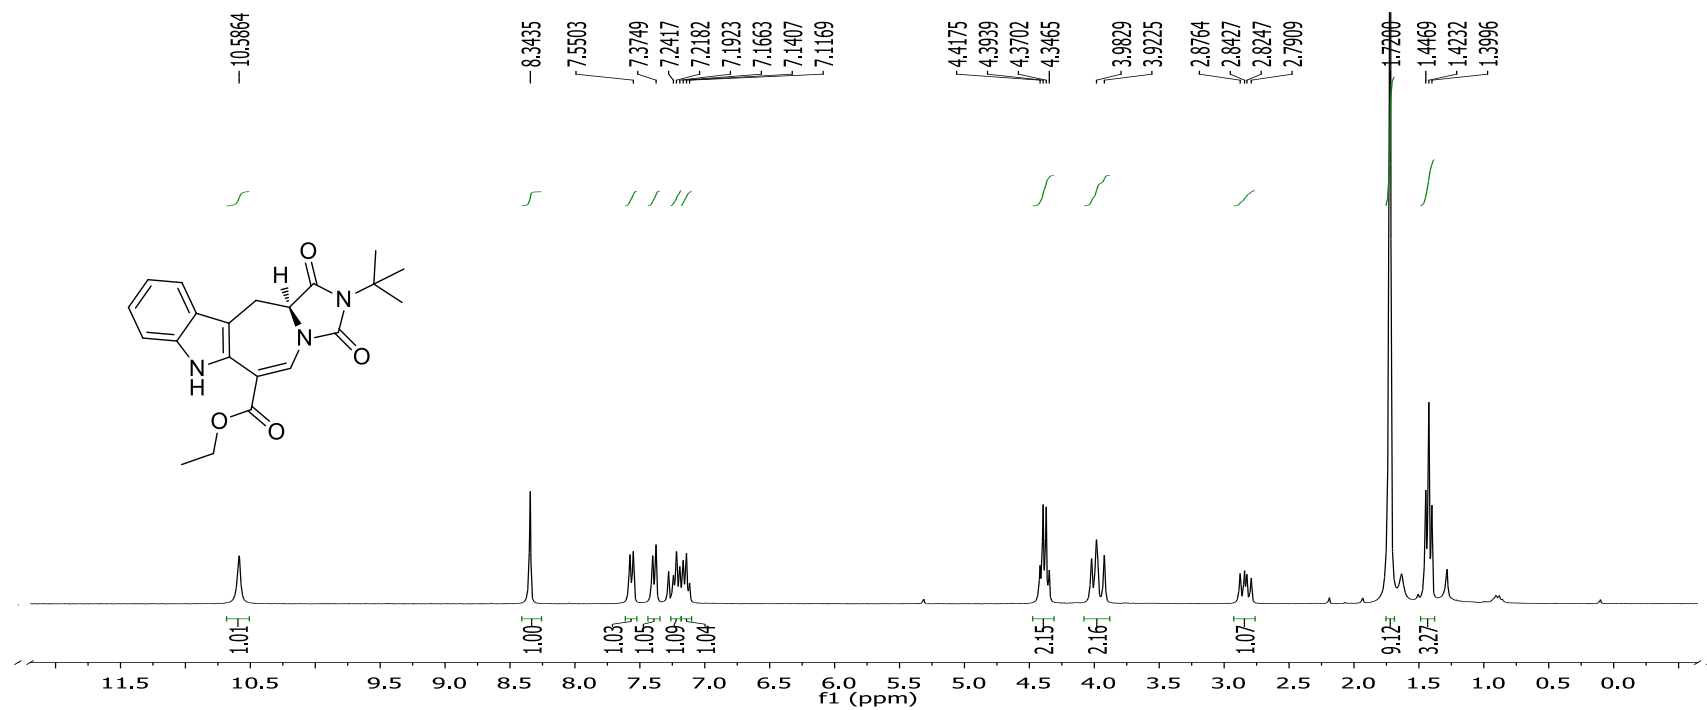

$^1\text{H}$  NMR spectrum (300 MHz) of compound **7a** in  $\text{CDCl}_3$



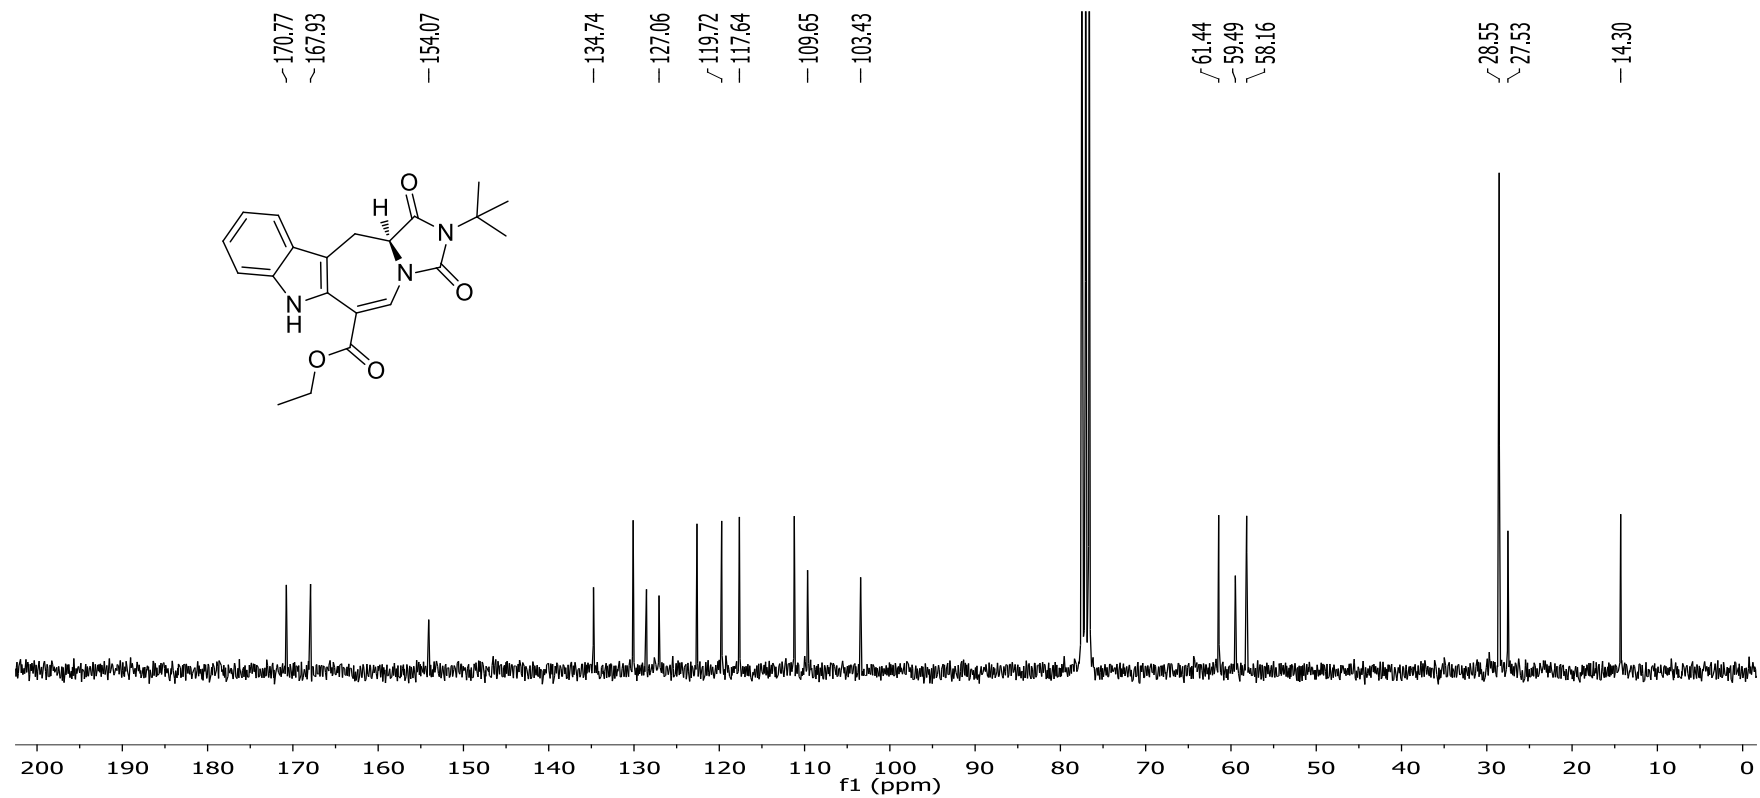

$^{13}\text{C}$  NMR spectrum (75 MHz) of compound **7a** in  $\text{CDCl}_3$

PD-N4-14

2013102908 45 (1.582) Cn (Cen,2, 80.00, Ht); Sm (Mn, 2x0.75); Sb (3,40.00); Cm (41:49-32:36x3.000)

Scan ES+  
2.96e7

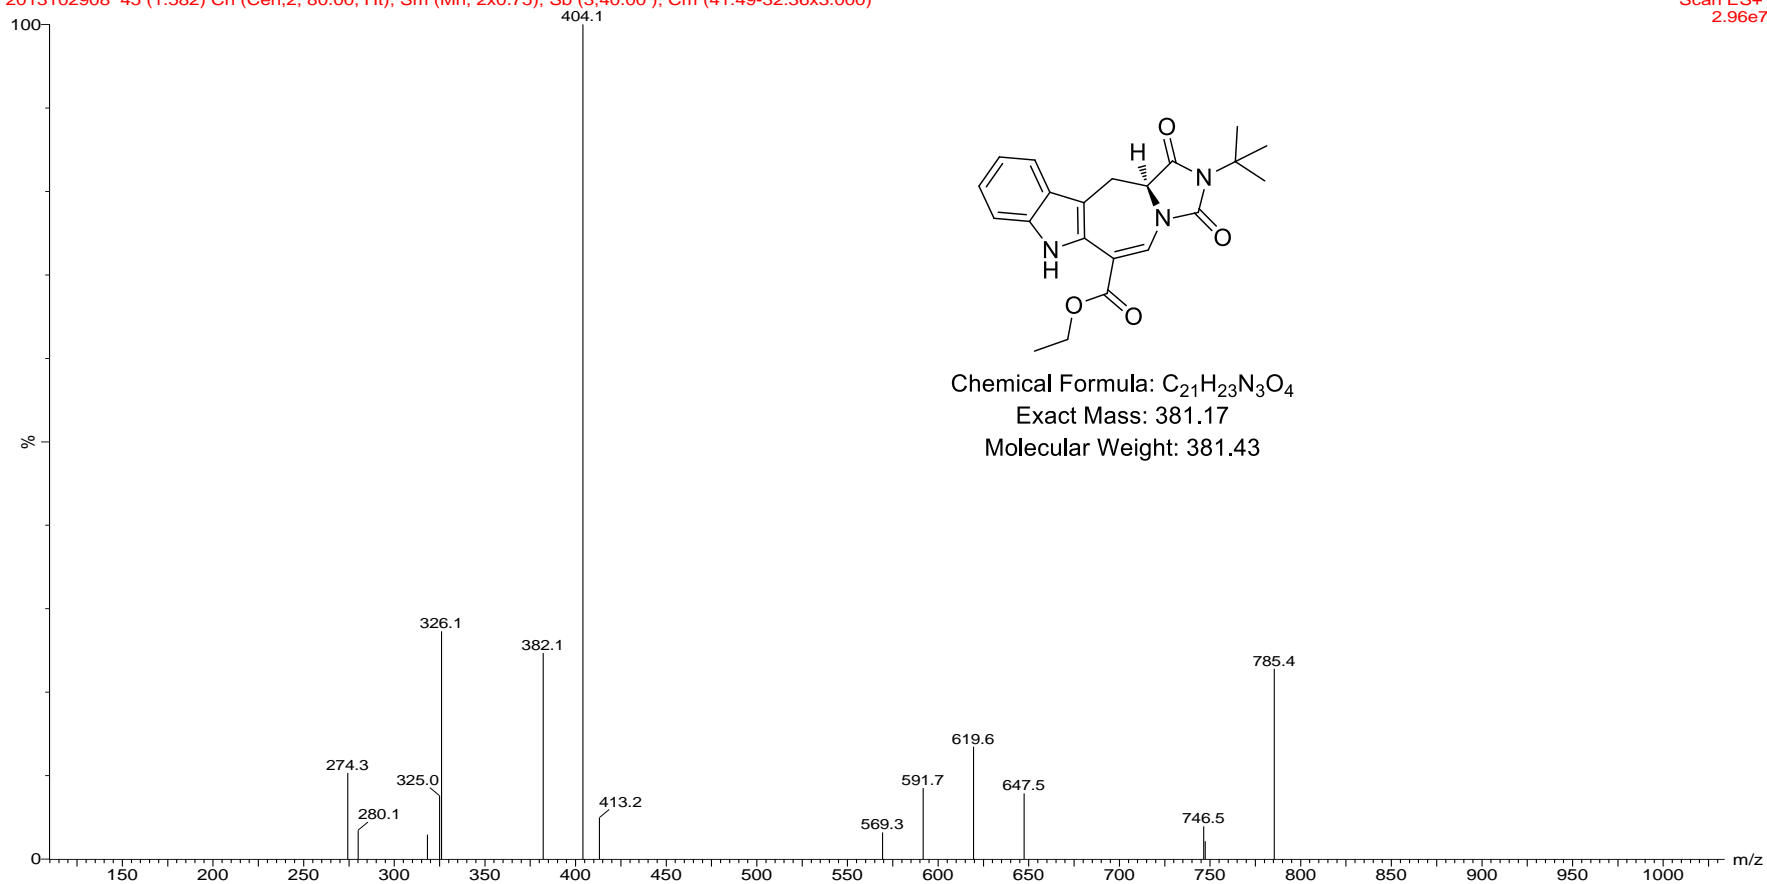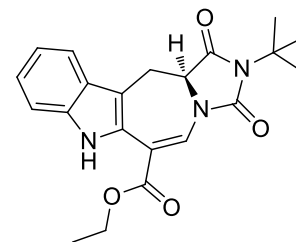

Chemical Formula: C<sub>21</sub>H<sub>23</sub>N<sub>3</sub>O<sub>4</sub>

Exact Mass: 381.17

Molecular Weight: 381.43

ESI-LRMS of compound 7a

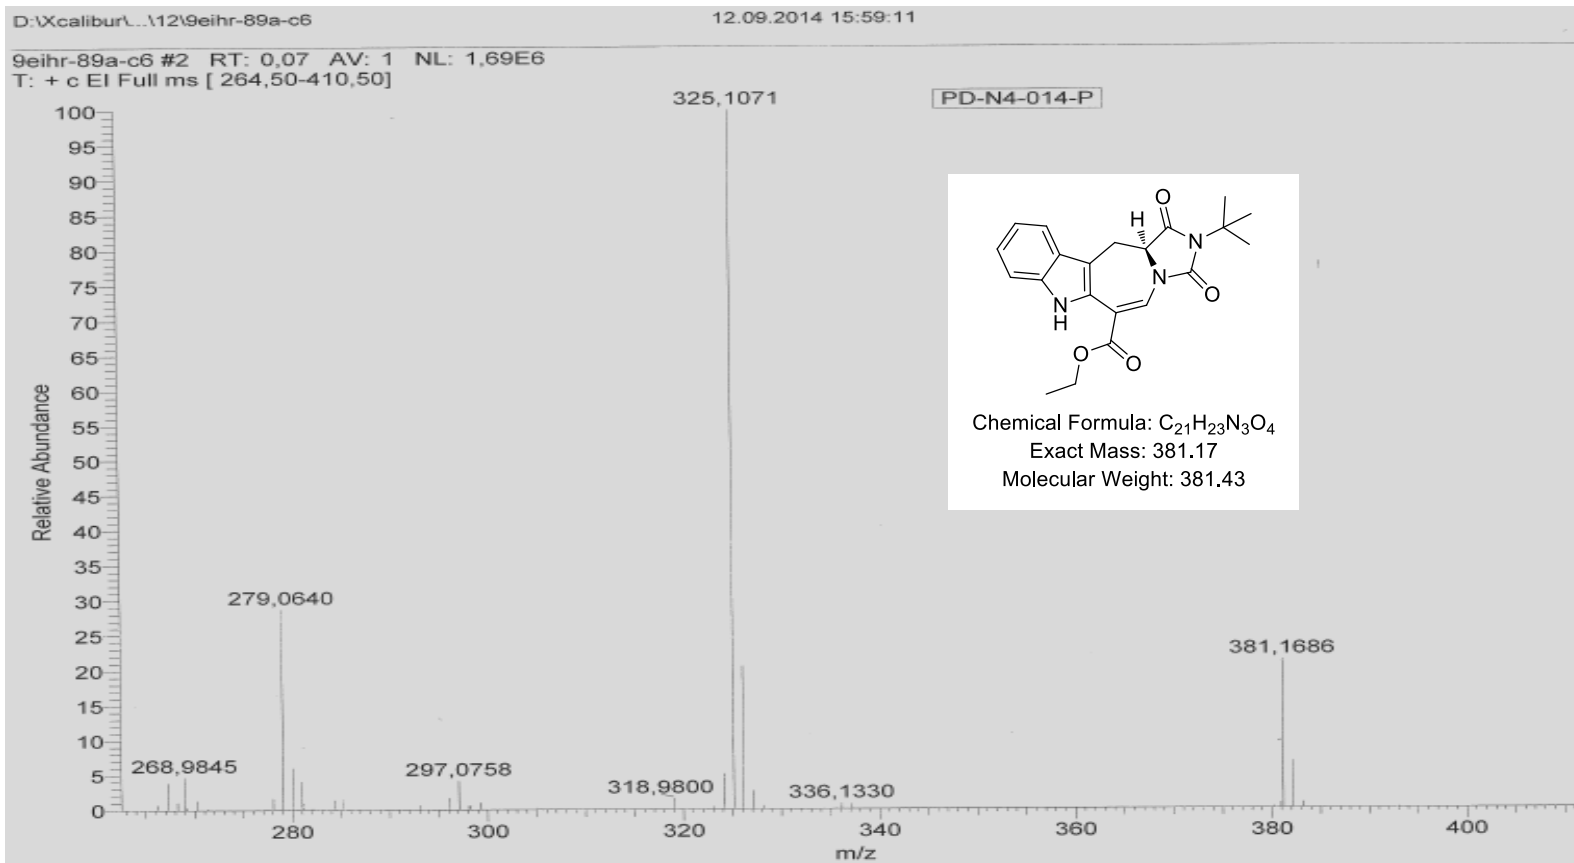

EI-HRMS of compound **7a**

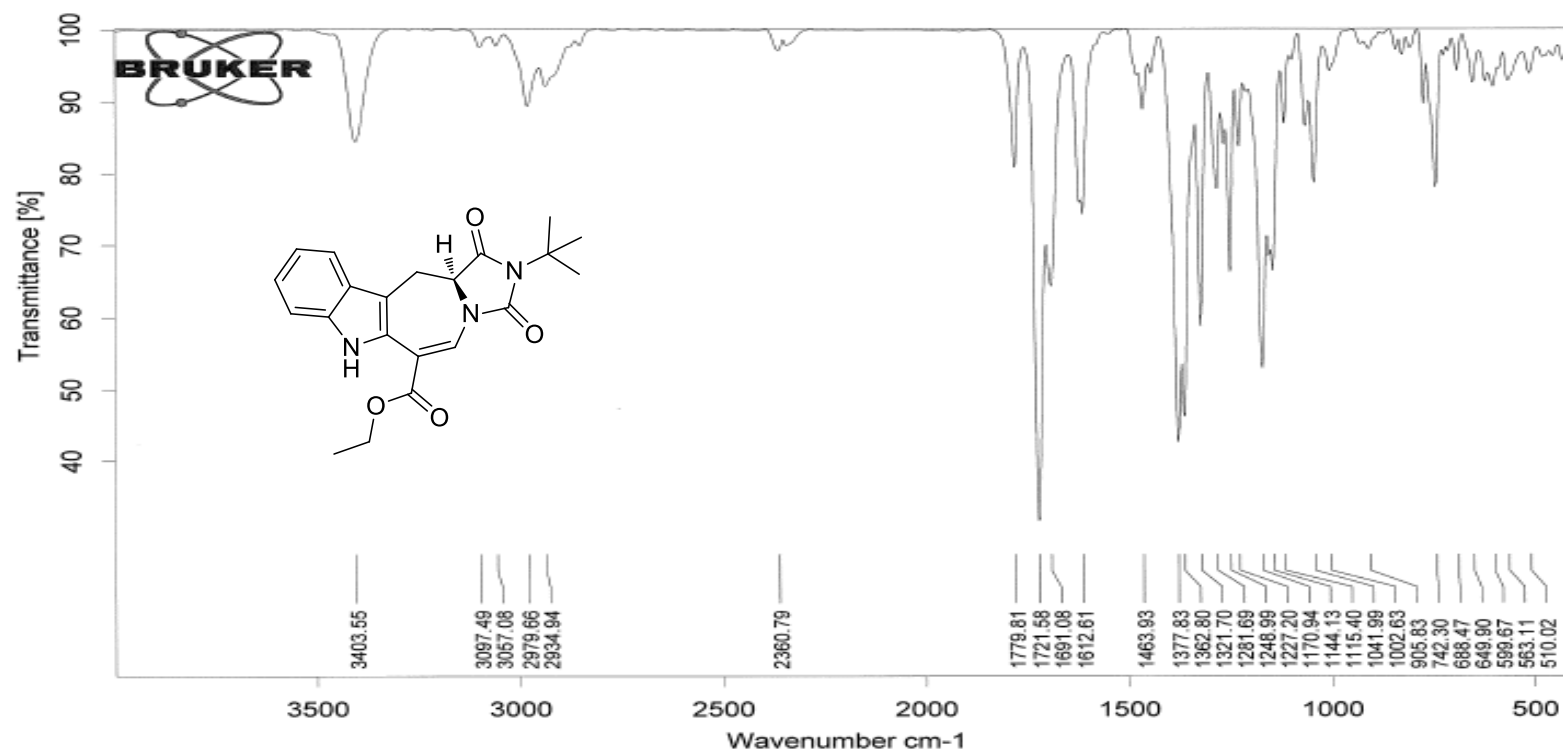

|                                                                    |                                |                         |          |
|--------------------------------------------------------------------|--------------------------------|-------------------------|----------|
| D:\temp-files\FTIR files\20140904\MIR_TR_DTGS_blank KBr_PD-N4-14.0 | MIR_TR_DTGS_blank KBr_PD-N4-14 | Instrument type and / o | 2014/9/4 |
|--------------------------------------------------------------------|--------------------------------|-------------------------|----------|

IR spectrum of compound 7a

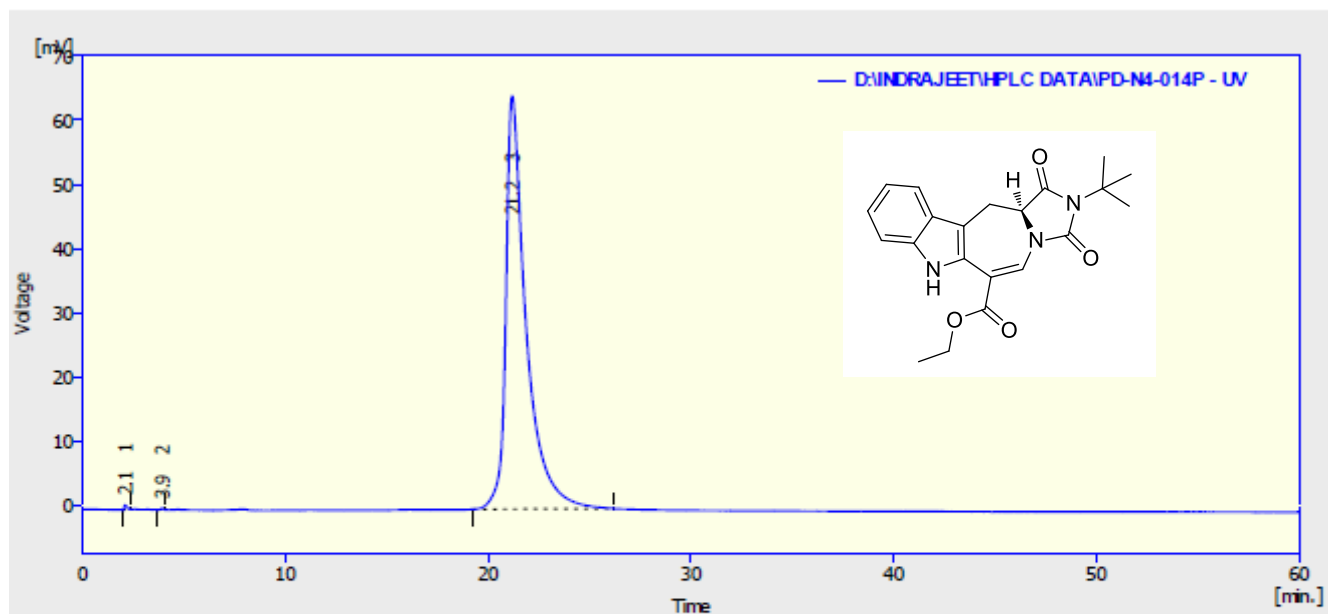

Result Table (Uncal - D:\INDRAJEET\HPLC DATA\PD-N4-014P - UV)

|   | Reten. Time [min] | Area [mV.s] | Height [mV] | Area [%] | Height [%] |
|---|-------------------|-------------|-------------|----------|------------|
| 1 | 2.096             | 7.285       | 0.718       | 0.2      | 1.1        |
| 2 | 3.916             | 1.400       | 0.251       | 0.0      | 0.4        |
| 3 | 21.188            | 4463.766    | 64.346      | 99.8     | 98.5       |
|   | Total             | 4472.530    | 65.315      | 100.0    | 100.0      |

### HPLC of compound 7a

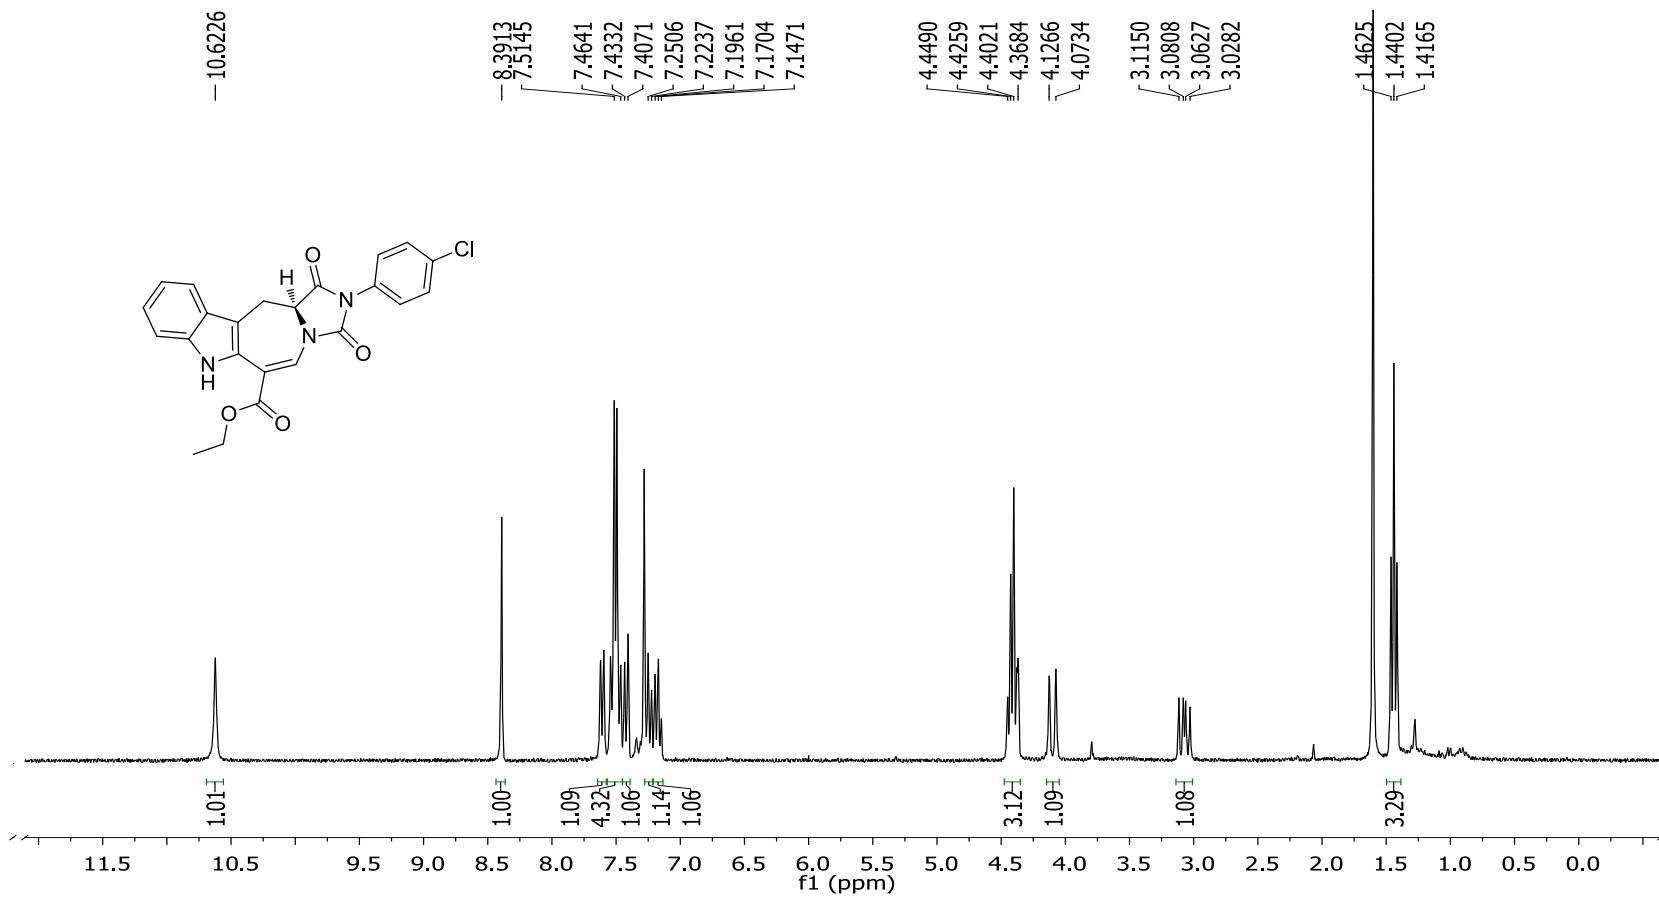

<sup>1</sup>H NMR spectrum (300 MHz) of compound **7b** in CDCl<sub>3</sub>

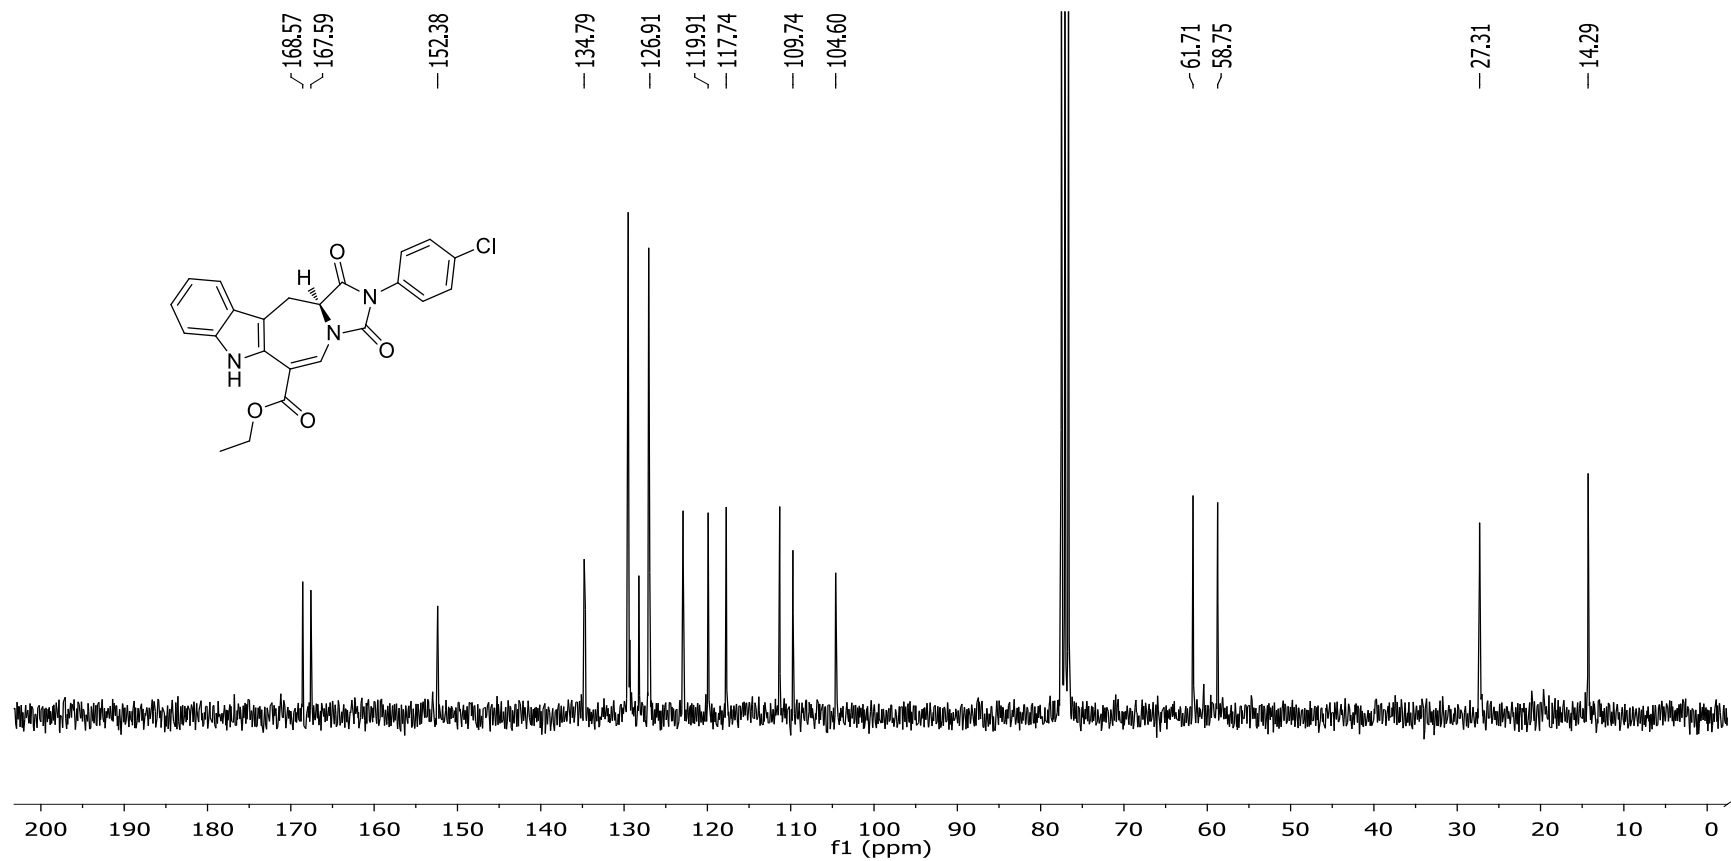

<sup>13</sup>C NMR spectrum (75 MHz) of compound **7b** in CDCl<sub>3</sub>

2014082201\_PD-N4-35\_140822165613 #383 RT: 1.33 AV: 1 NL: 1.66E7  
T: {0,0} + c EI Full ms [50.00-1000.00]

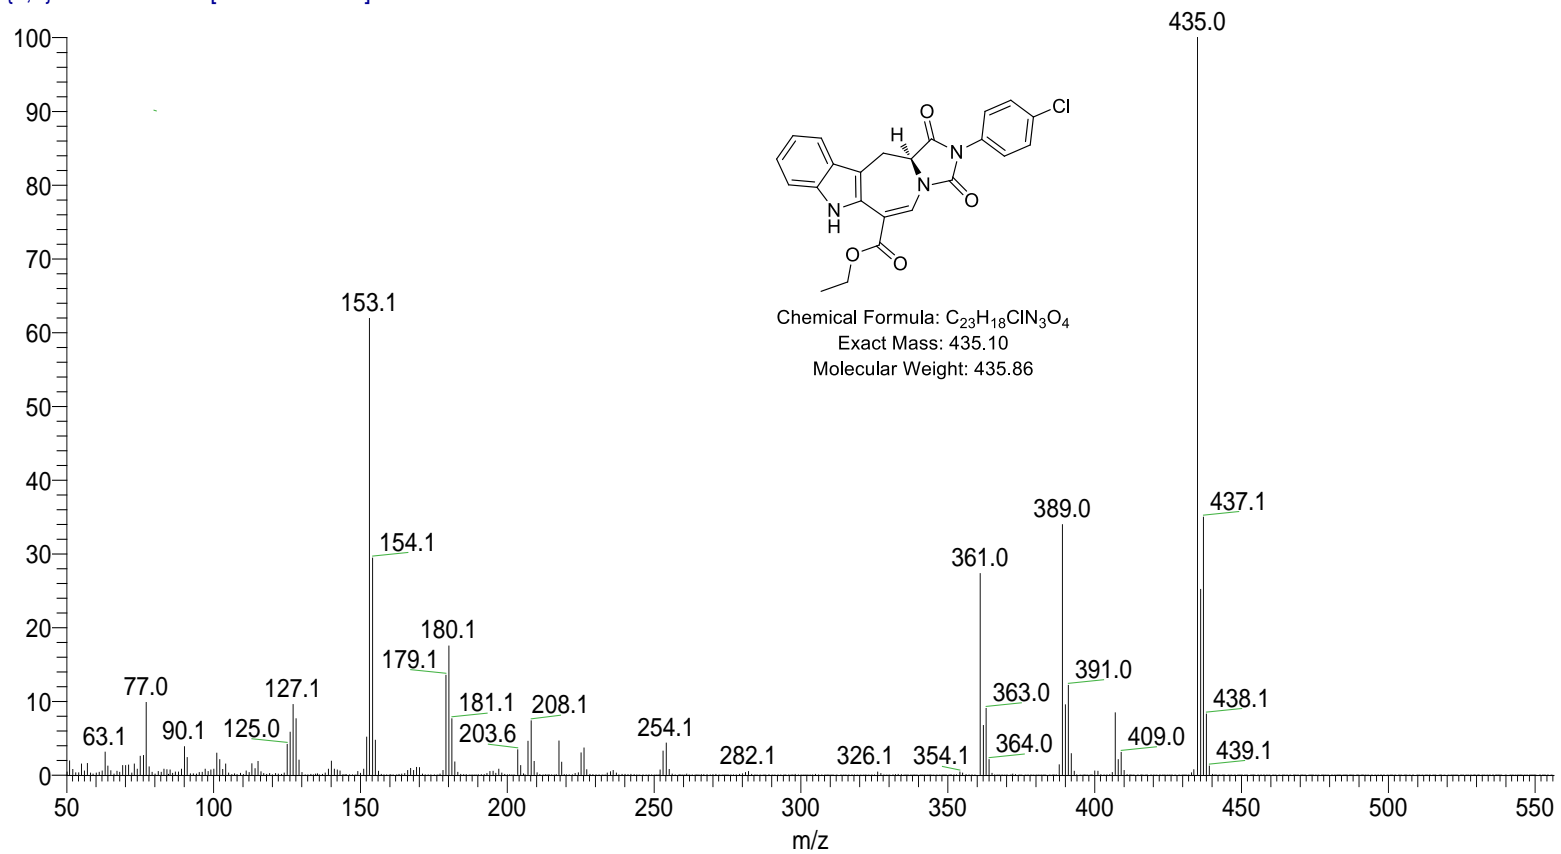

EI-LRMS of compound 7b



D:\Xcalibur\...LIN-14-09\10\9eihr-75-c1

10.09.2014 17:18:47

9eihr-75-c1 #7 RT: 0,32 AV: 1 NL: 2,39E7  
T: + c EI Full ms [ 299,50-460,50]

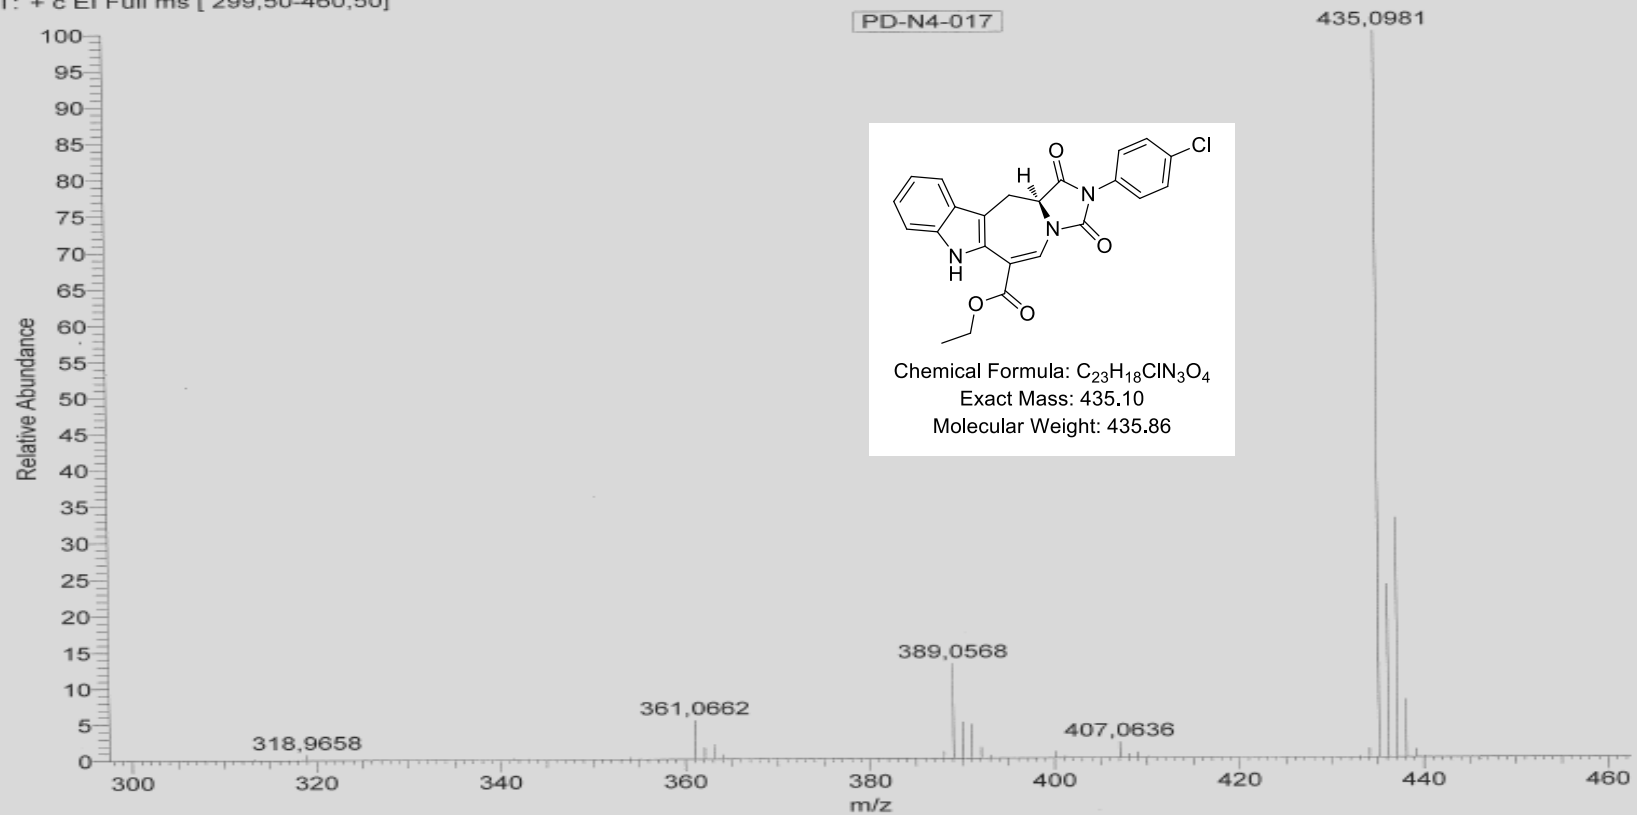

EI-HRMS of compound **7b**

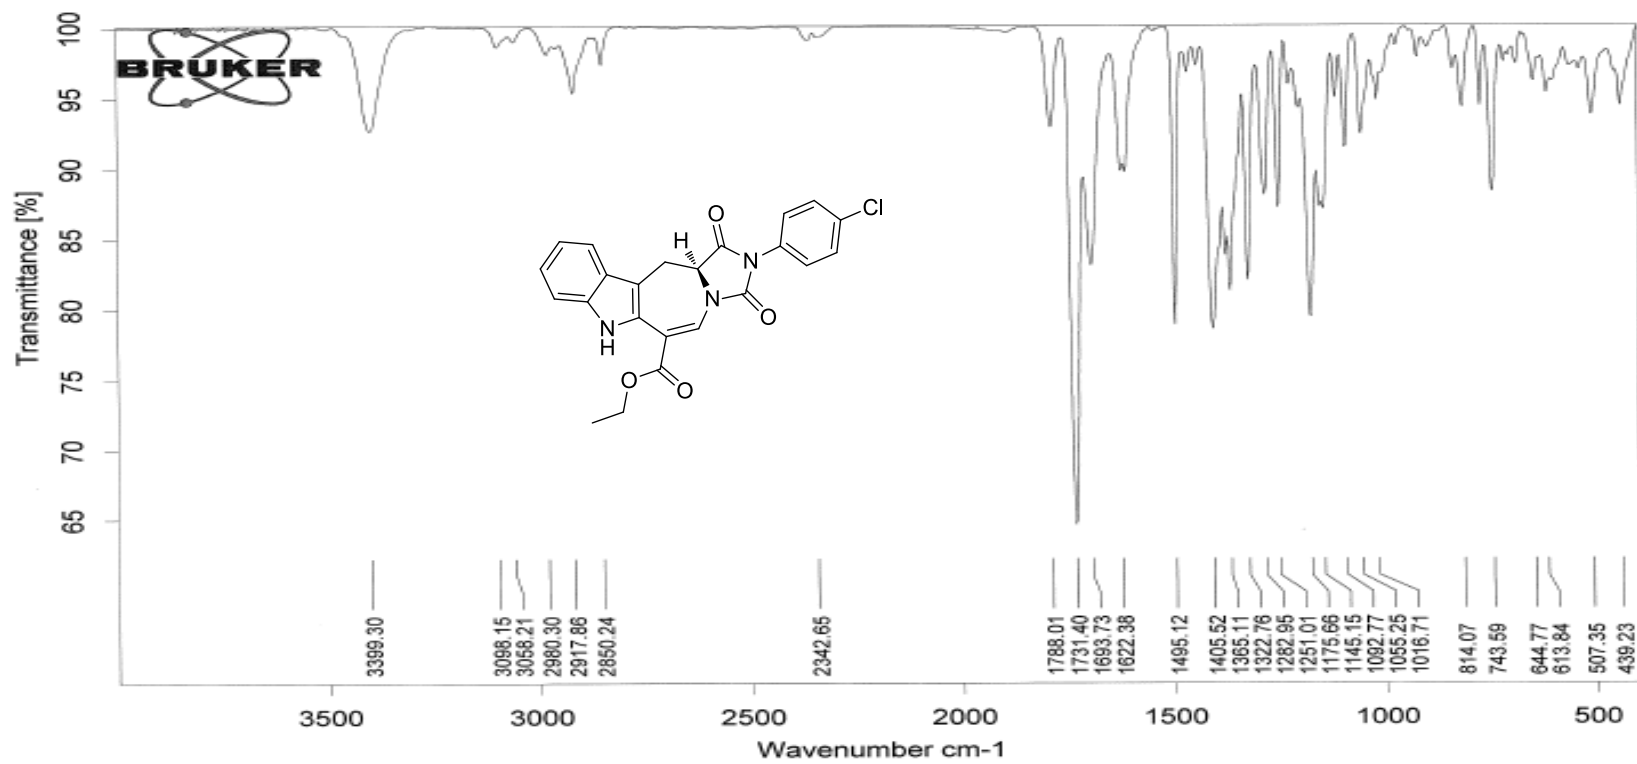

|                                                                    |                                |                         |          |
|--------------------------------------------------------------------|--------------------------------|-------------------------|----------|
| D:\temp-files\FTIR files\20140904\MIR_TR_DTGS_blank KBr_PD-N4-17.0 | MIR_TR_DTGS_blank KBr_PD-N4-17 | Instrument type and / o | 2014/9/4 |
|--------------------------------------------------------------------|--------------------------------|-------------------------|----------|

IR spectrum of compound **7b**

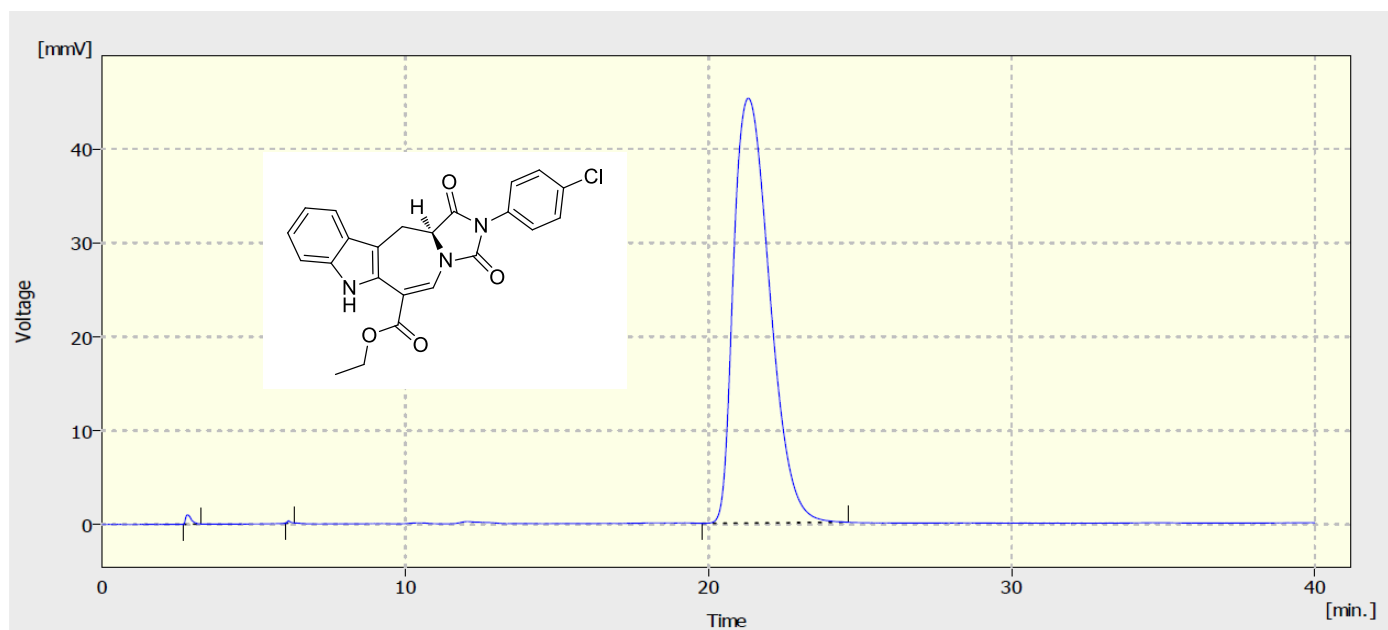

Result Table (Uncal - D:\PRASHANT HPLC PDF\PD-N4-P-CLDMF)

|   | Reten. Time<br>[min] | Area<br>[mV.s] | Height<br>[mV] | Area<br>[%] | Height<br>[%] | W05<br>[min] |
|---|----------------------|----------------|----------------|-------------|---------------|--------------|
| 1 | 2.816                | 13.099         | 1.000          | 0.3         | 2.2           | 0.20         |
| 2 | 6.148                | 1.670          | 0.250          | 0.0         | 0.5           | 0.10         |
| 3 | 21.316               | 3737.111       | 45.244         | 99.6        | 97.3          | 1.31         |
|   | Total                | 3751.880       | 46.494         | 100.0       | 100.0         |              |

### HPLC of compound 7b

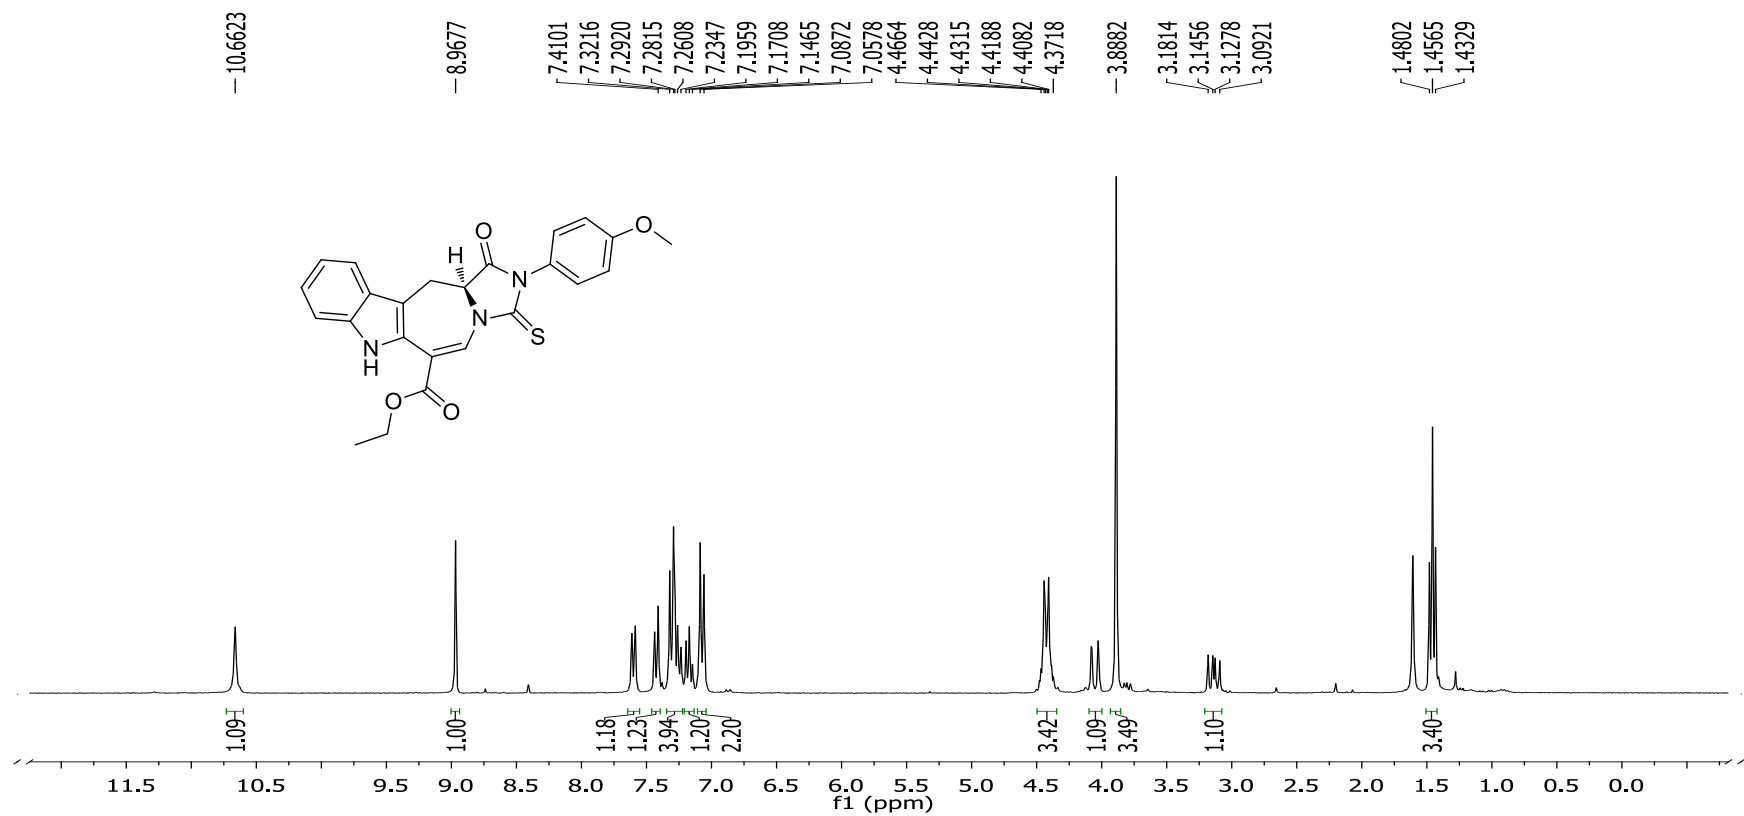

<sup>1</sup>H NMR spectrum (300 MHz) of compound **7c** in CDCl<sub>3</sub>

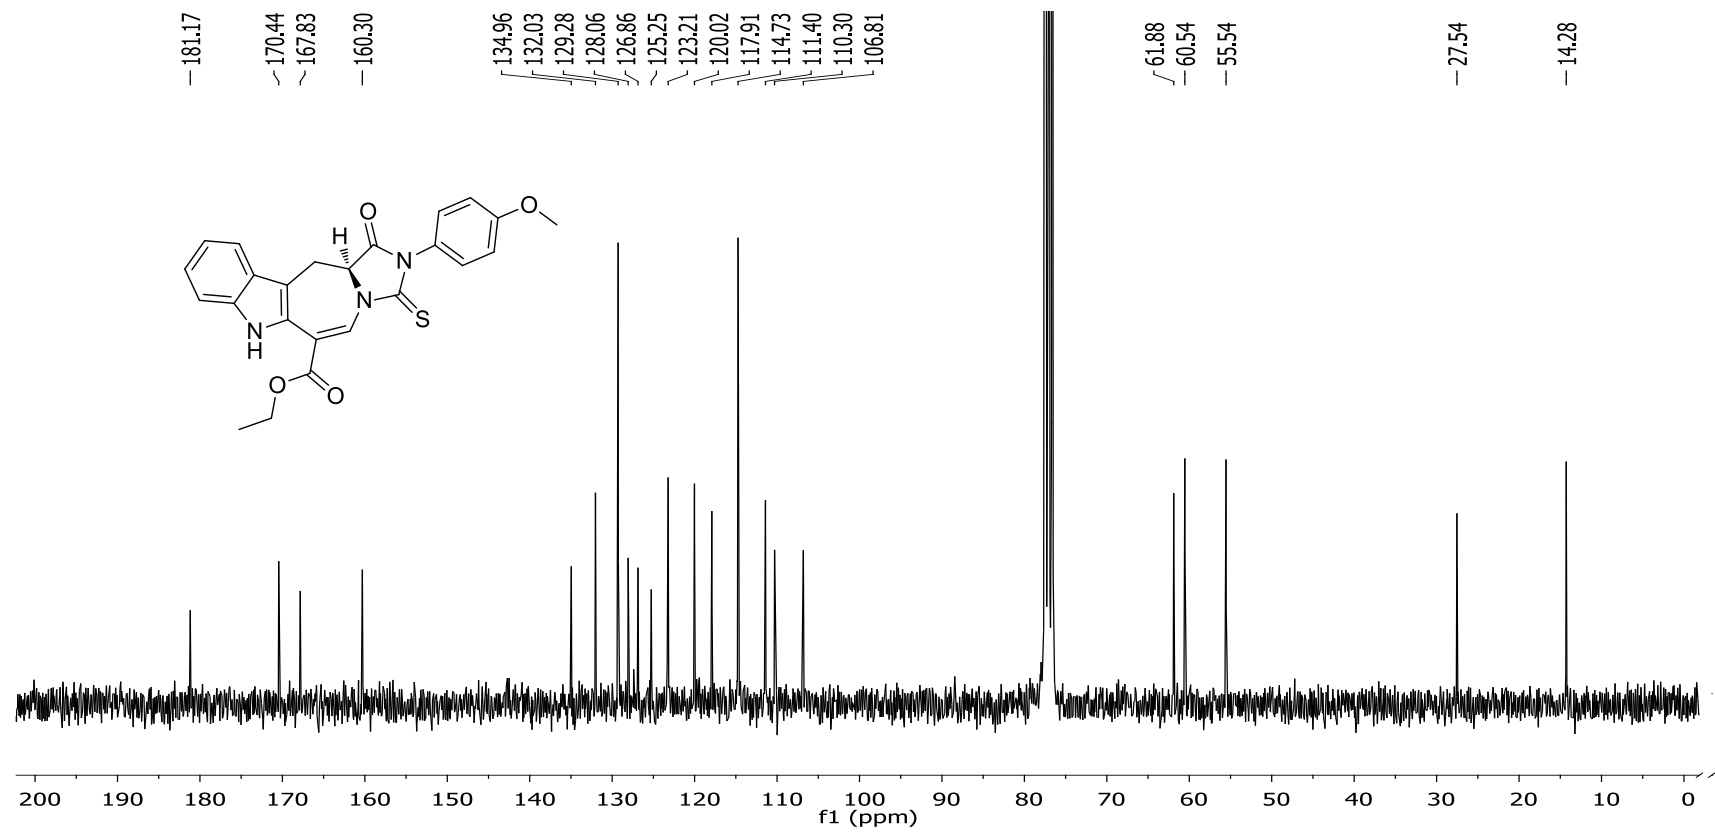

$^{13}\text{C}$  NMR spectrum (75 MHz) of compound **7c** in  $\text{CDCl}_3$

2014012201\_ib-N6-087 #403 RT: 1.40 AV: 1 SB: 109 1.71-1.94, 0.87-1.02 NL: 7.99E7  
T: {0,0} + c EI Full ms [50.00-900.00]

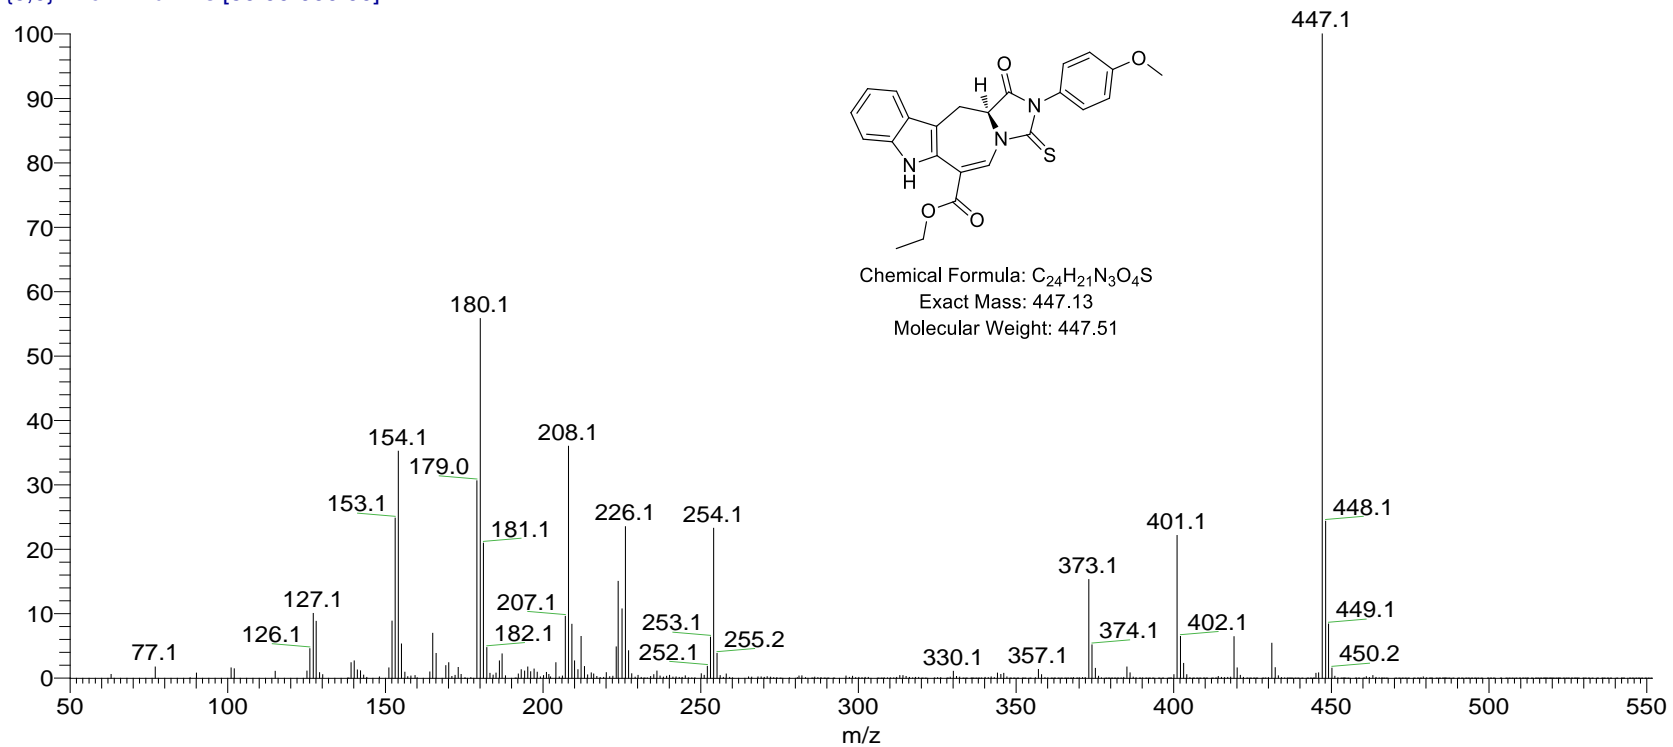

EI-LRMS of compound **7c**

9eihr-72-c1 #1 RT: 0,05 AV: 1 NL: 1,84E7  
T: + c EI Full ms [ 319,50-485,50]

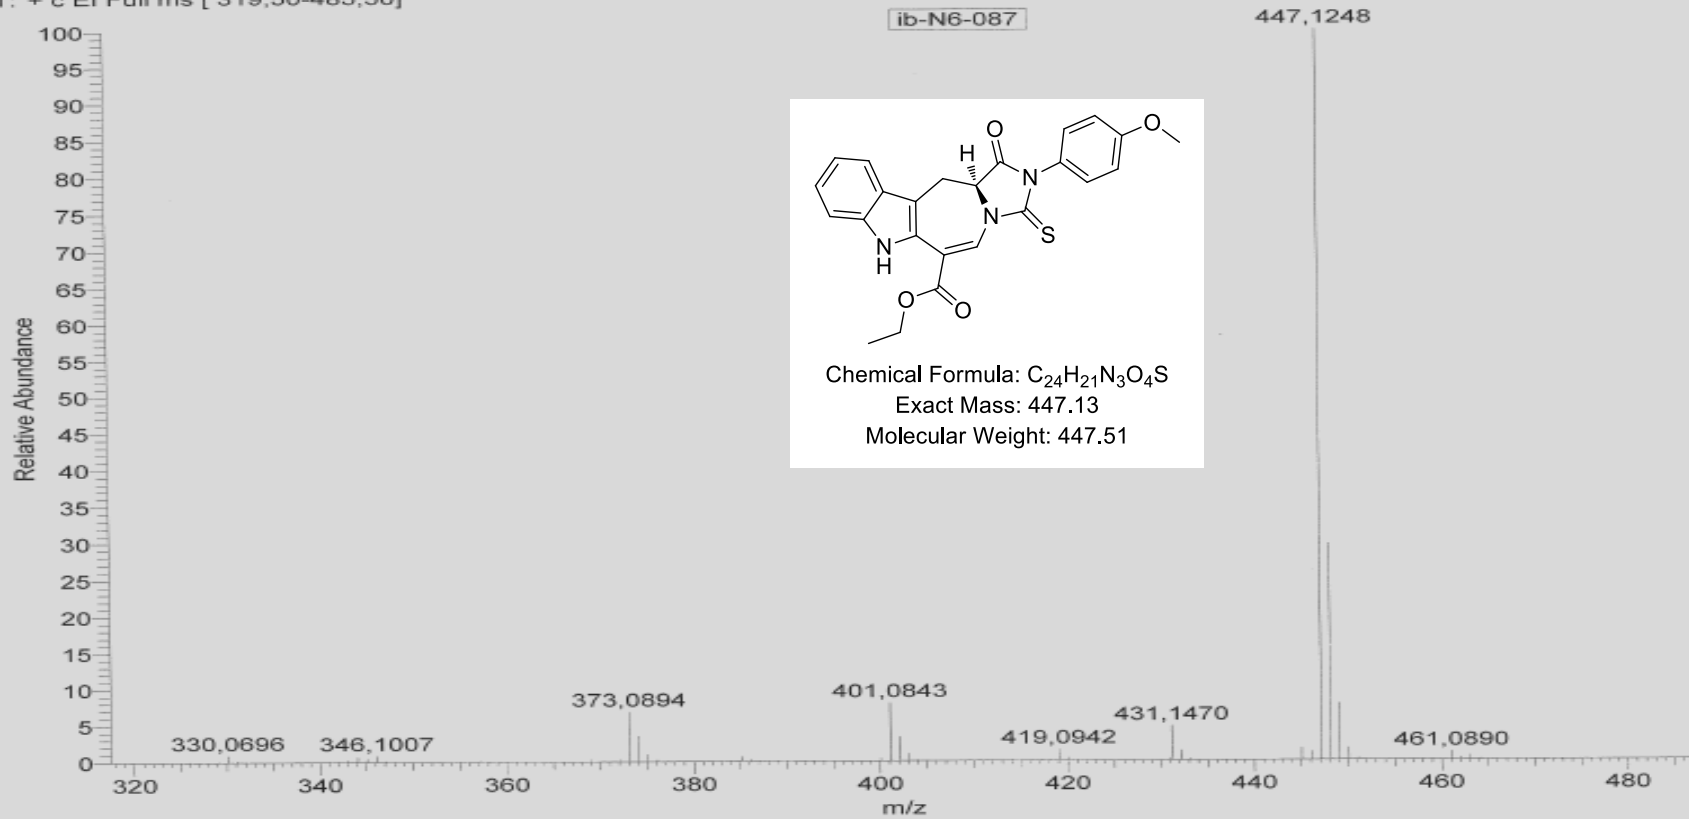

EI-HRMS of compound **7c**

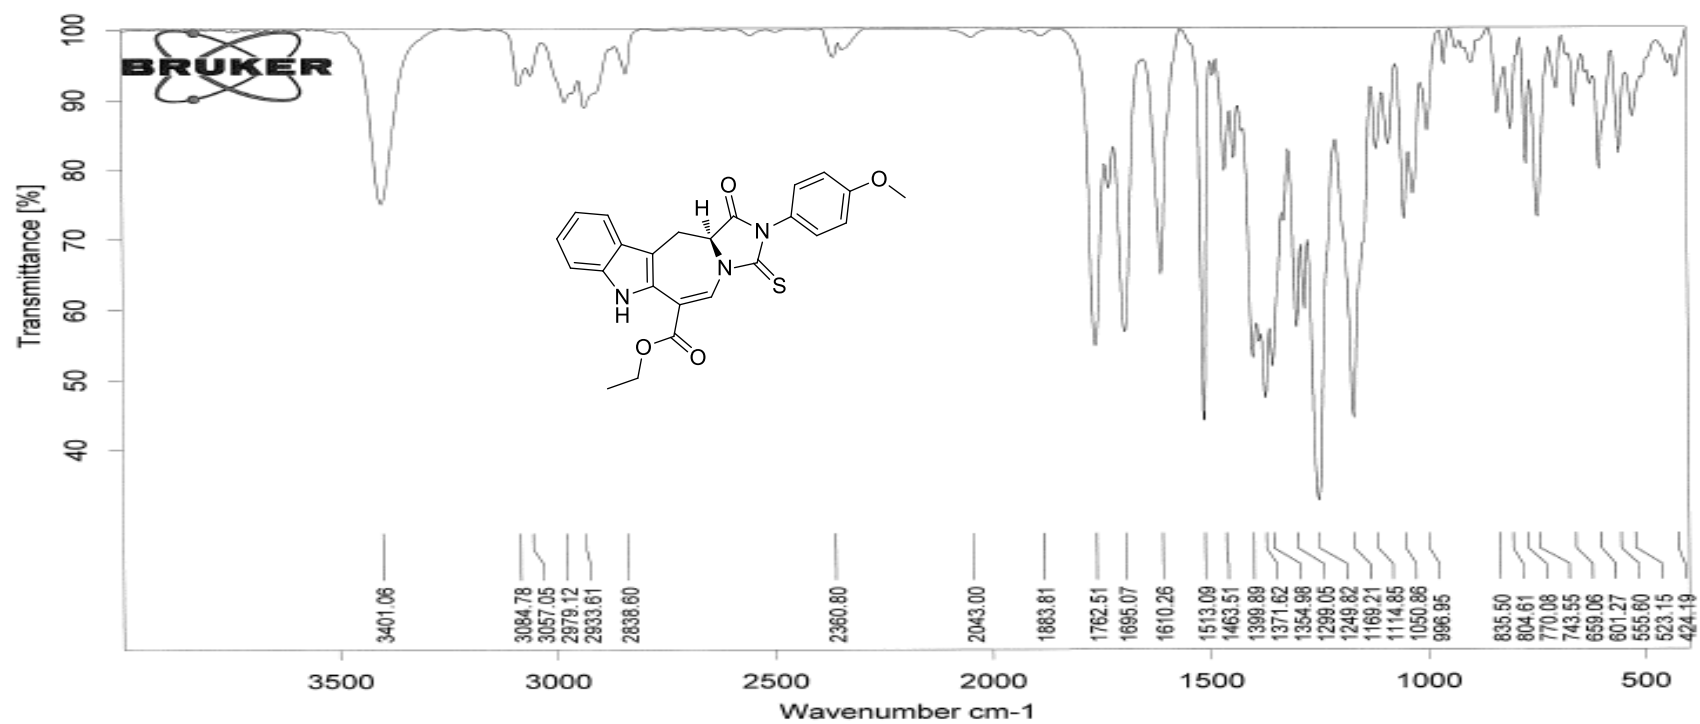

|                                                                     |                                 |                         |          |
|---------------------------------------------------------------------|---------------------------------|-------------------------|----------|
| D:\temp-files\FTIR files\20140904\MIR_TR_DTGS_blank KBr_ib-N6-087.0 | MIR_TR_DTGS_blank KBr_ib-N6-087 | Instrument type and / o | 2014/9/4 |
|---------------------------------------------------------------------|---------------------------------|-------------------------|----------|

IR spectrum of compound 7c



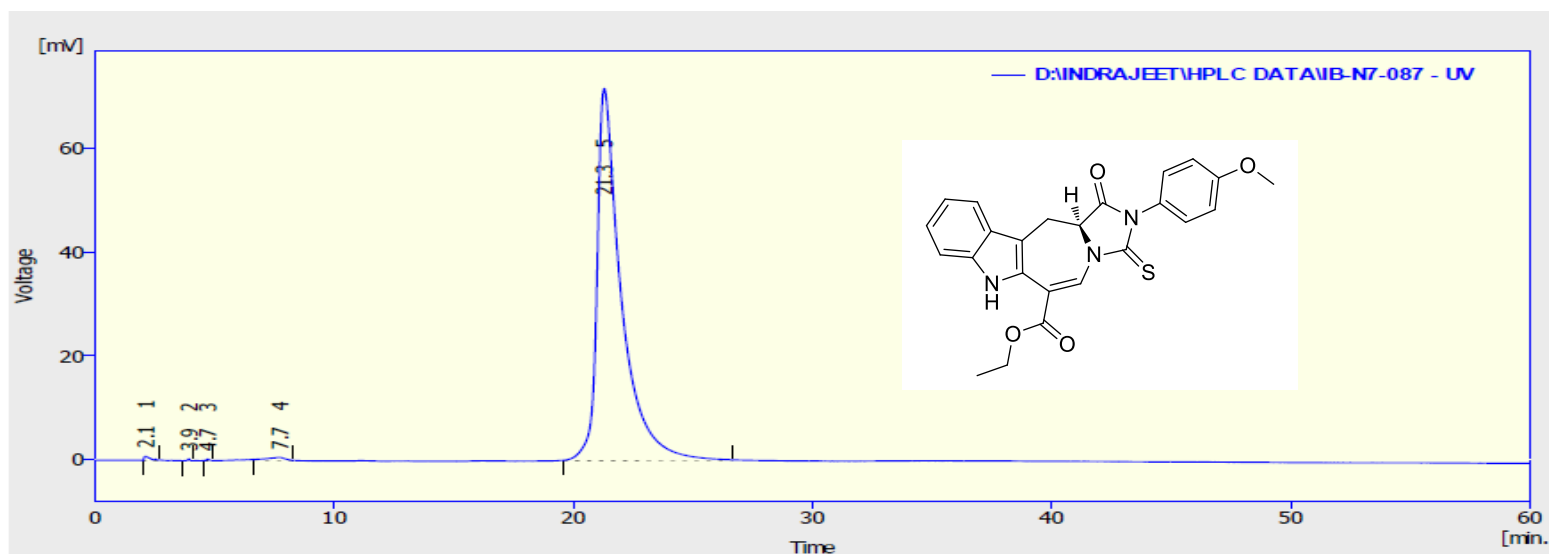

Result Table (Uncal - D:\INDRAJEET\HPLC DATA\IB-N7-087 - UV)

|   | Reten. Time [min] | Area [mV.s] | Height [mV] | Area [%] | Height [%] |
|---|-------------------|-------------|-------------|----------|------------|
| 1 | 2.124             | 12.244      | 0.755       | 0.2      | 1.0        |
| 2 | 3.920             | 2.299       | 0.365       | 0.0      | 0.5        |
| 3 | 4.704             | 2.333       | 0.296       | 0.0      | 0.4        |
| 4 | 7.728             | 22.959      | 0.515       | 0.5      | 0.7        |
| 5 | 21.288            | 5018.974    | 71.674      | 99.2     | 97.4       |
|   | Total             | 5058.809    | 73.604      | 100.0    | 100.0      |

HPLC of compound 7c

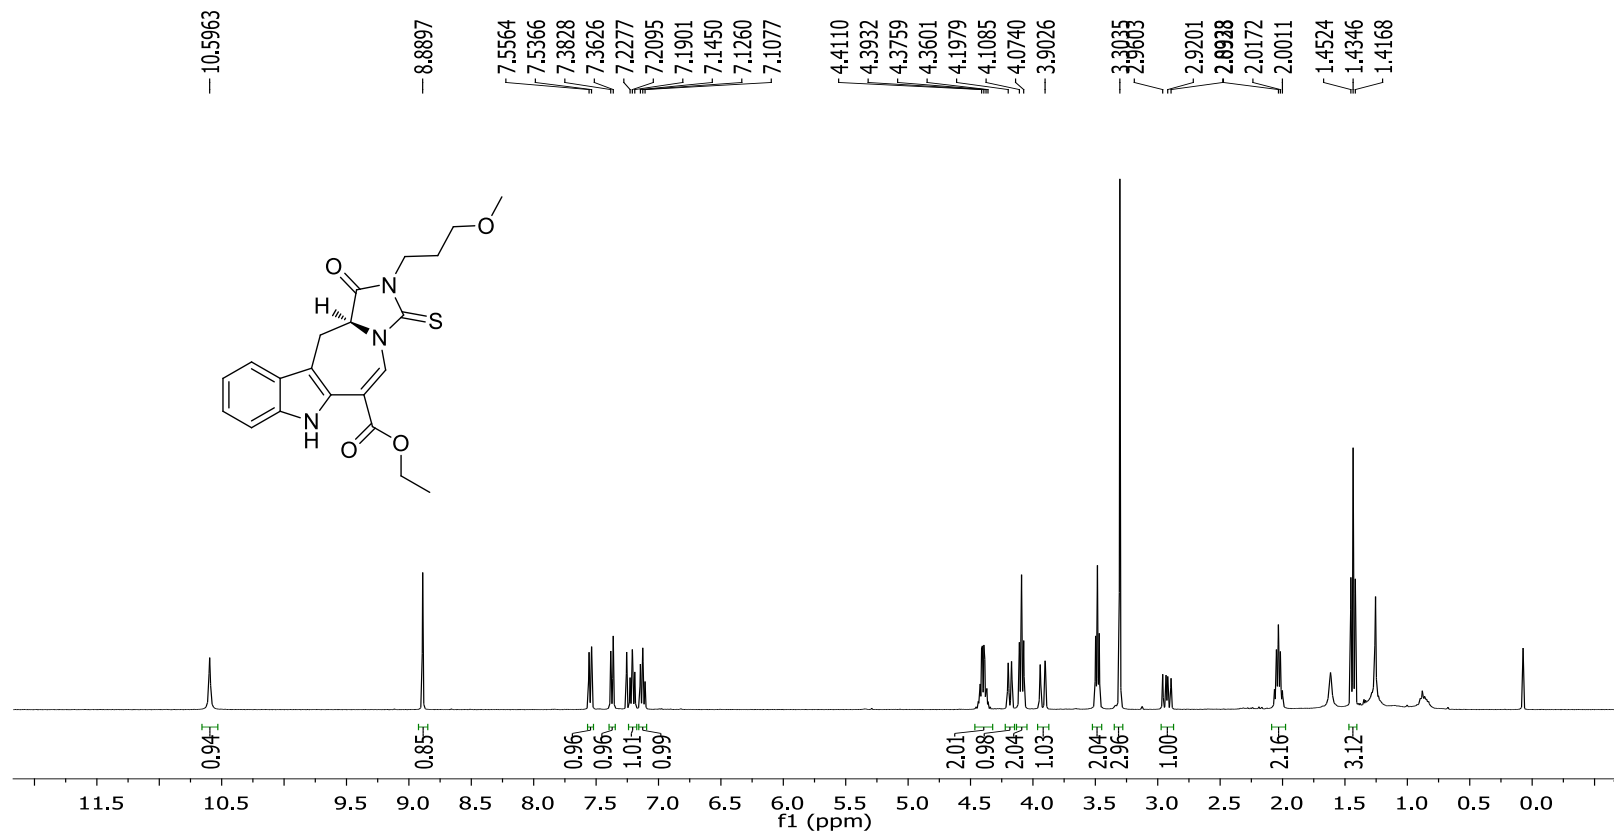

<sup>1</sup>H NMR spectrum (400 MHz) of compound **7d** in CDCl<sub>3</sub>

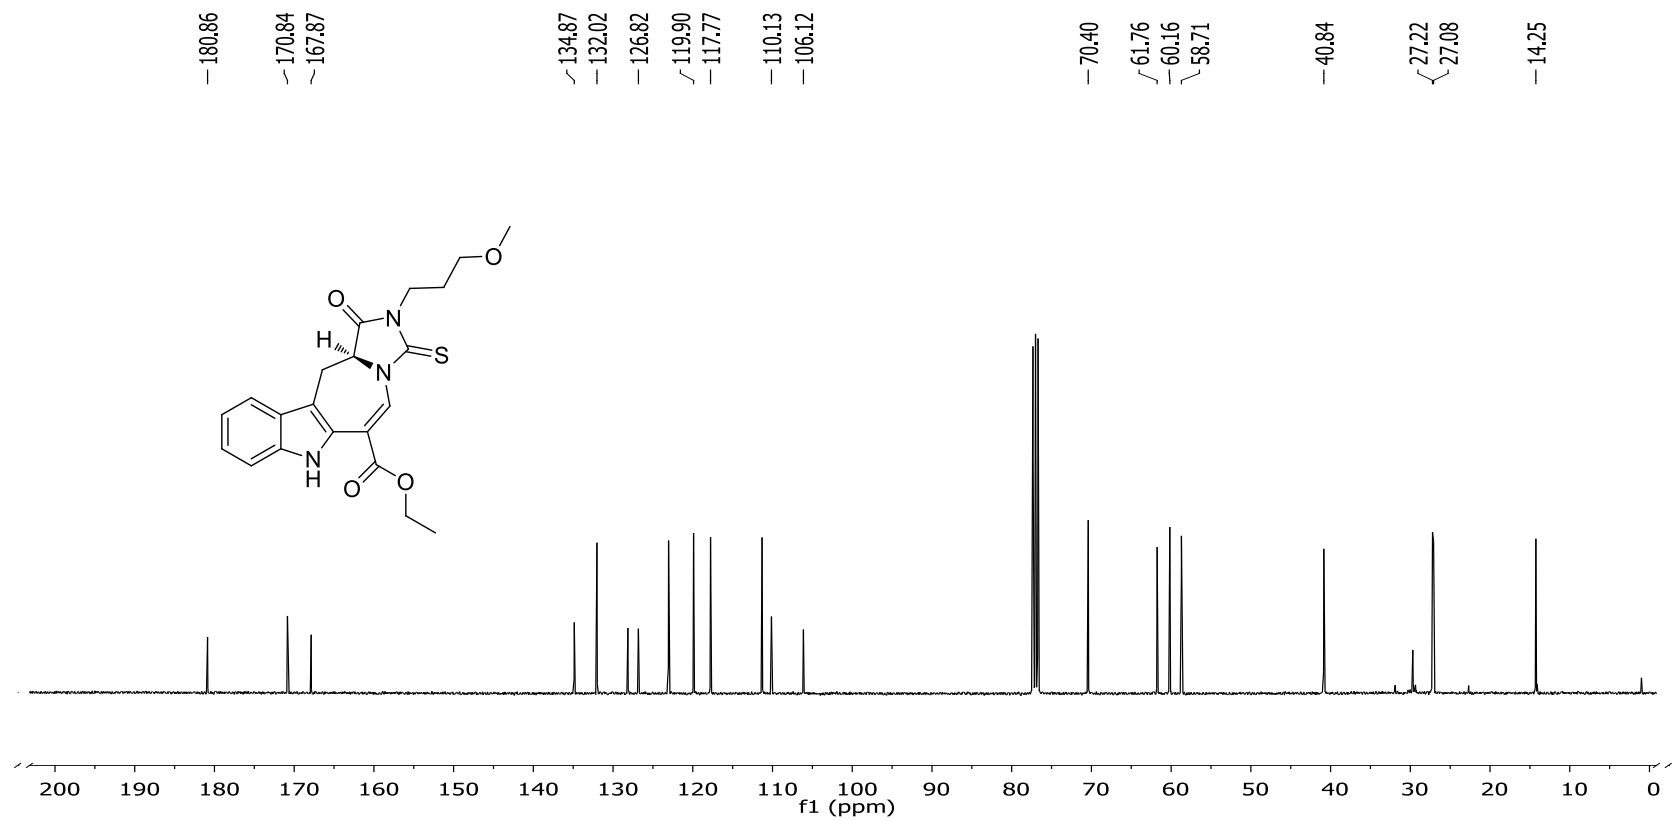

<sup>13</sup>C NMR spectrum (101 MHz) of compound **7d** in CDCl<sub>3</sub>

2014070906\_TT-LN2-09 #274 RT: 0.96 AV: 1 NL: 5.07E6  
T: {0,0} + c EI Full ms [50.00-900.00]

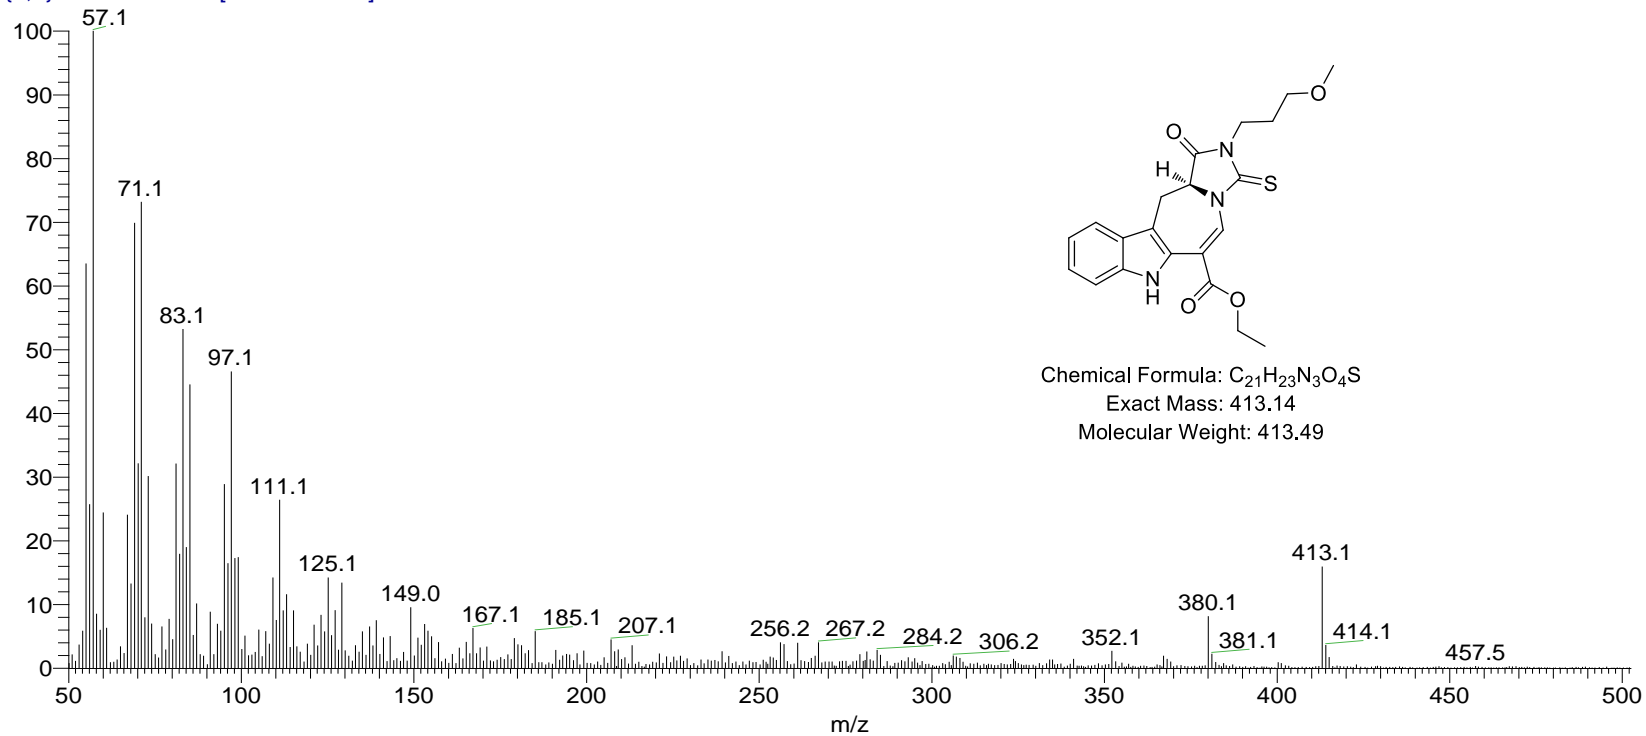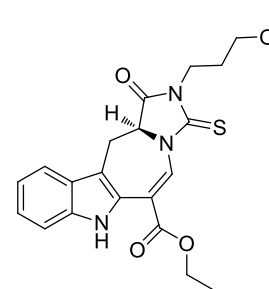

Chemical Formula: C<sub>21</sub>H<sub>23</sub>N<sub>3</sub>O<sub>4</sub>S  
Exact Mass: 413.14  
Molecular Weight: 413.49

EI-LRMS of compound **7d**

9eihr-83-c2 #6 RT: 0,36 AV: 1 NL: 1,10E7

T: + c EI Full ms [ 277,50-435,50]

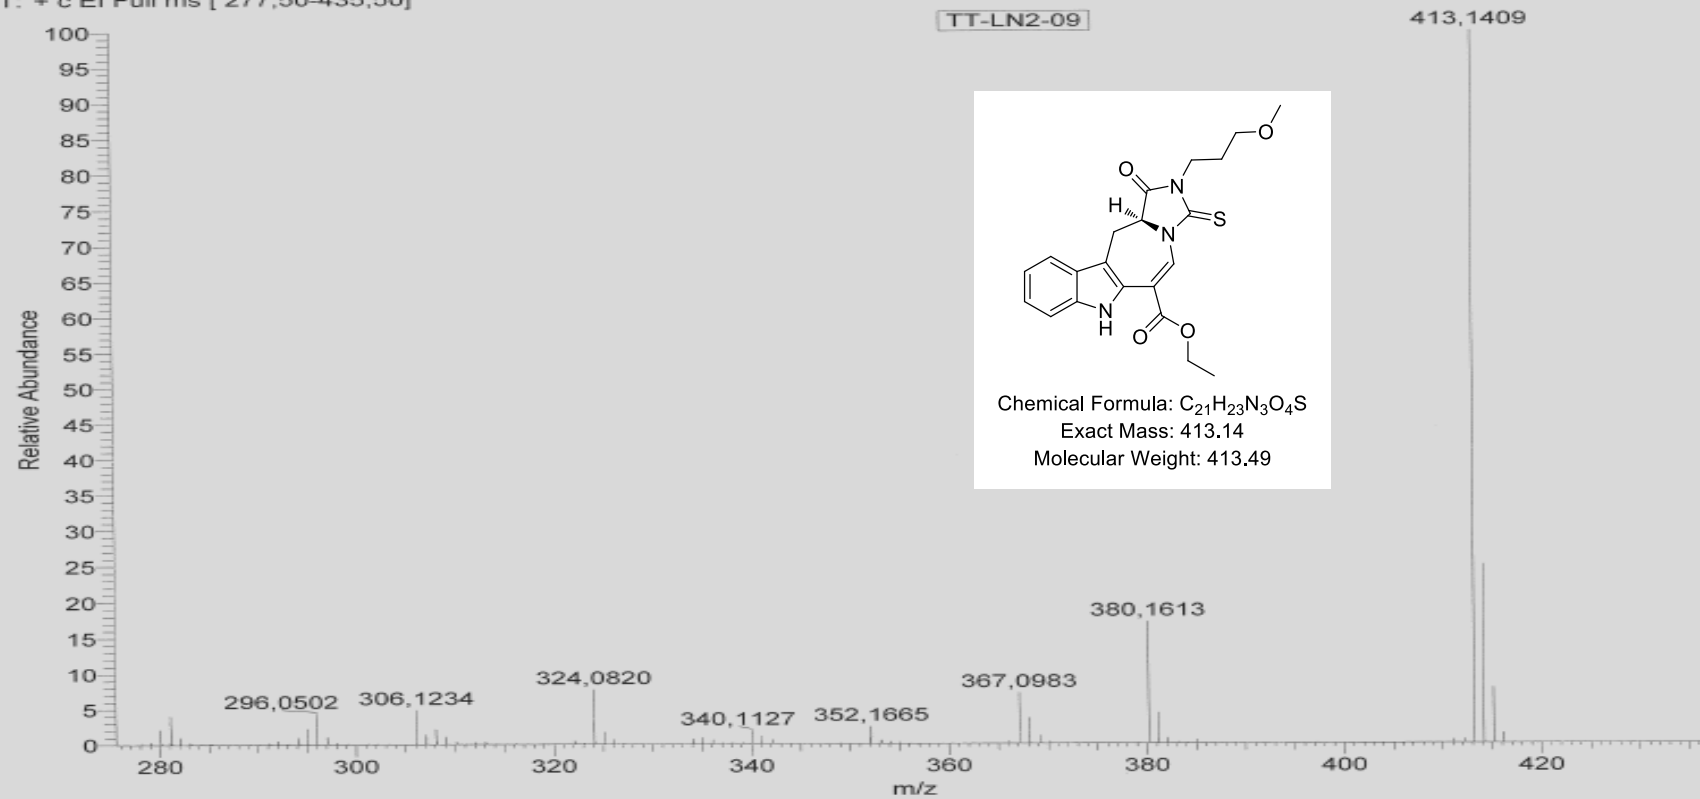EI-HRMS of compound **7d**

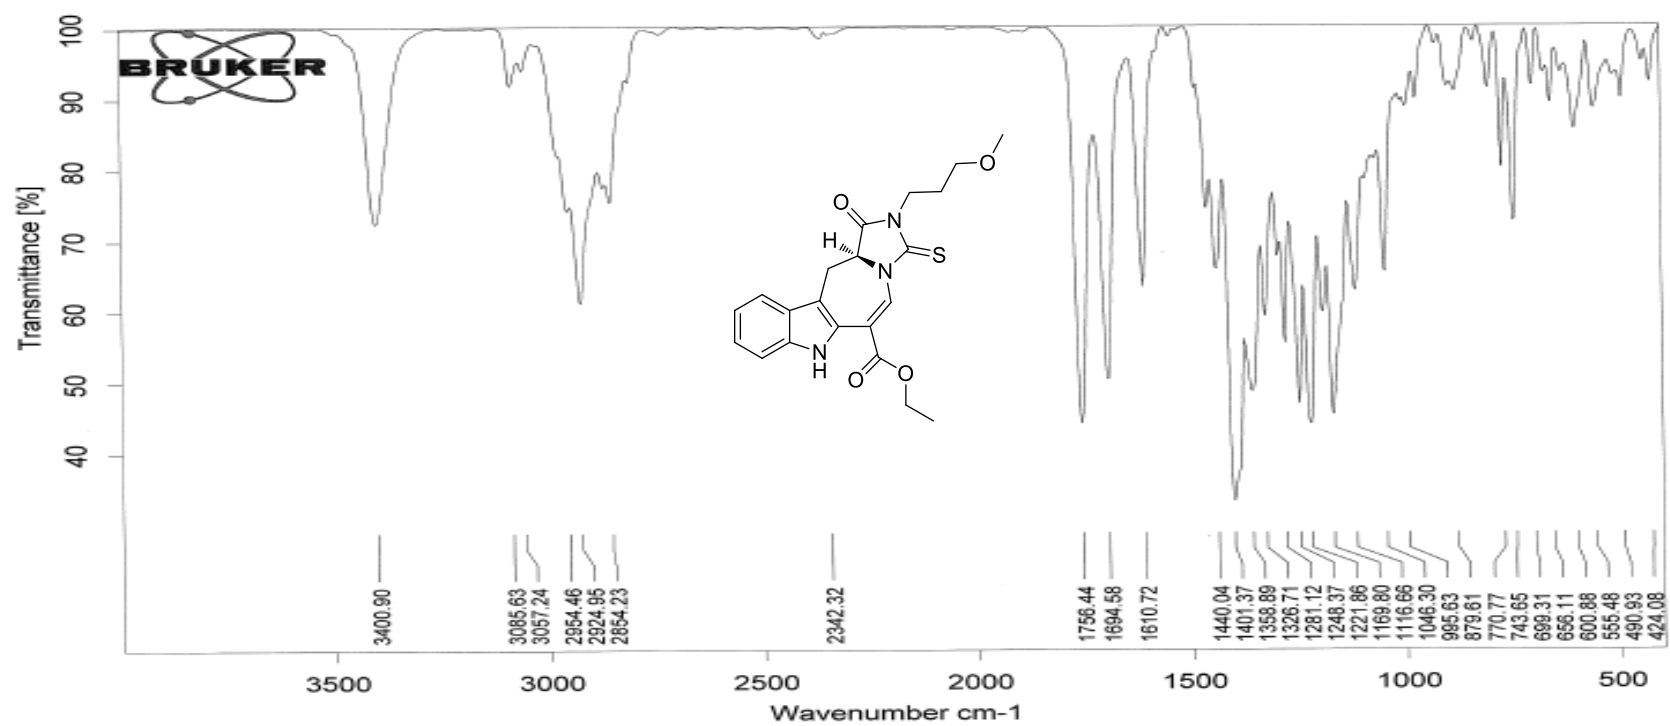

D:\temp-files\FTIR files\20140904\MIR\_TR\_DTGS\_blank KBr\_TT-LN2-09.0

MIR\_TR\_DTGS\_blank KBr\_TT-LN2-09

Instrument type and /

2014/9/4

IR spectrum of compound **7d**

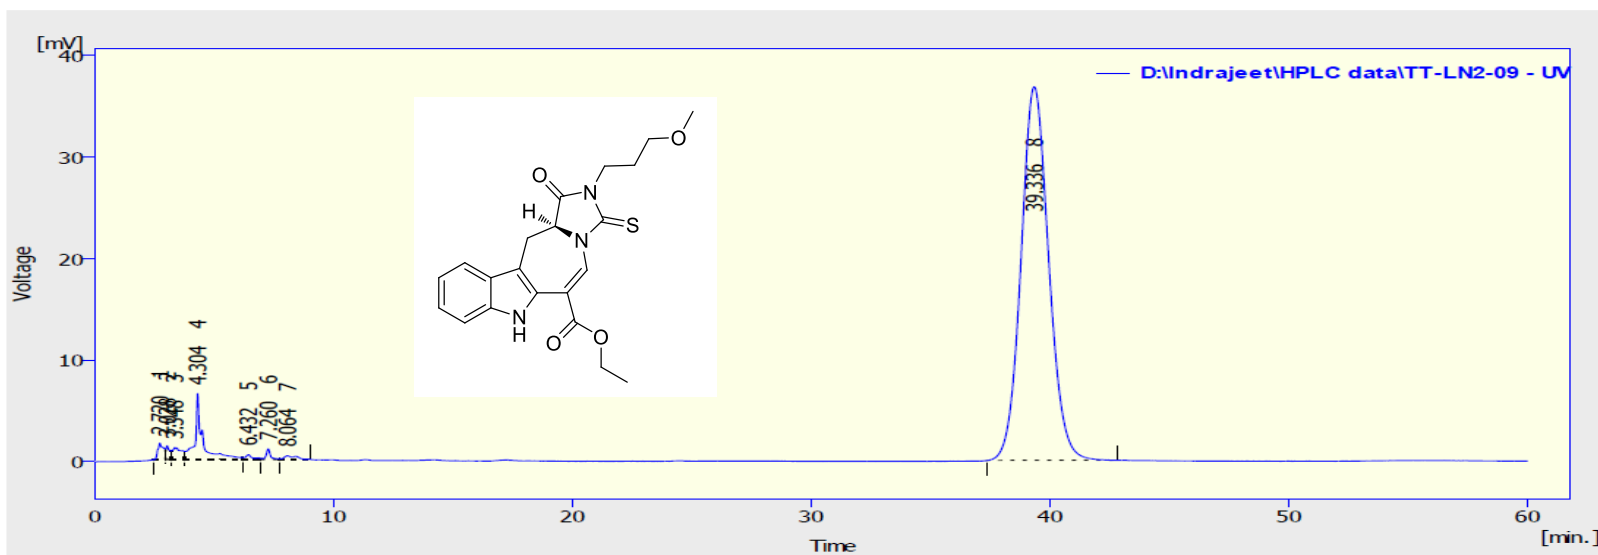

Result Table (Uncal - D:\Indrajeet\HPLC data\TT-LN2-09 - UV)

|   | Reten. Time [min] | Area [mV.s] | Height [mV] | Area [%] | Height [%] | W05 [min] |
|---|-------------------|-------------|-------------|----------|------------|-----------|
| 1 | 2.720             | 26.642      | 1.619       | 0.8      | 3.3        | 0.34      |
| 2 | 3.028             | 15.490      | 1.343       | 0.5      | 2.7        | 0.24      |
| 3 | 3.348             | 31.577      | 1.184       | 1.0      | 2.4        | 0.55      |
| 4 | 4.304             | 145.225     | 6.492       | 4.5      | 13.2       | 0.12      |
| 5 | 6.432             | 10.361      | 0.473       | 0.3      | 1.0        | 0.23      |
| 6 | 7.260             | 13.371      | 1.043       | 0.4      | 2.1        | 0.16      |
| 7 | 8.064             | 12.908      | 0.362       | 0.4      | 0.7        | 0.64      |
| 8 | 39.336            | 2968.802    | 36.836      | 92.1     | 74.6       | 1.23      |
|   | Total             | 3224.378    | 49.352      | 100.0    | 100.0      |           |

### HPLC of compound **7d**

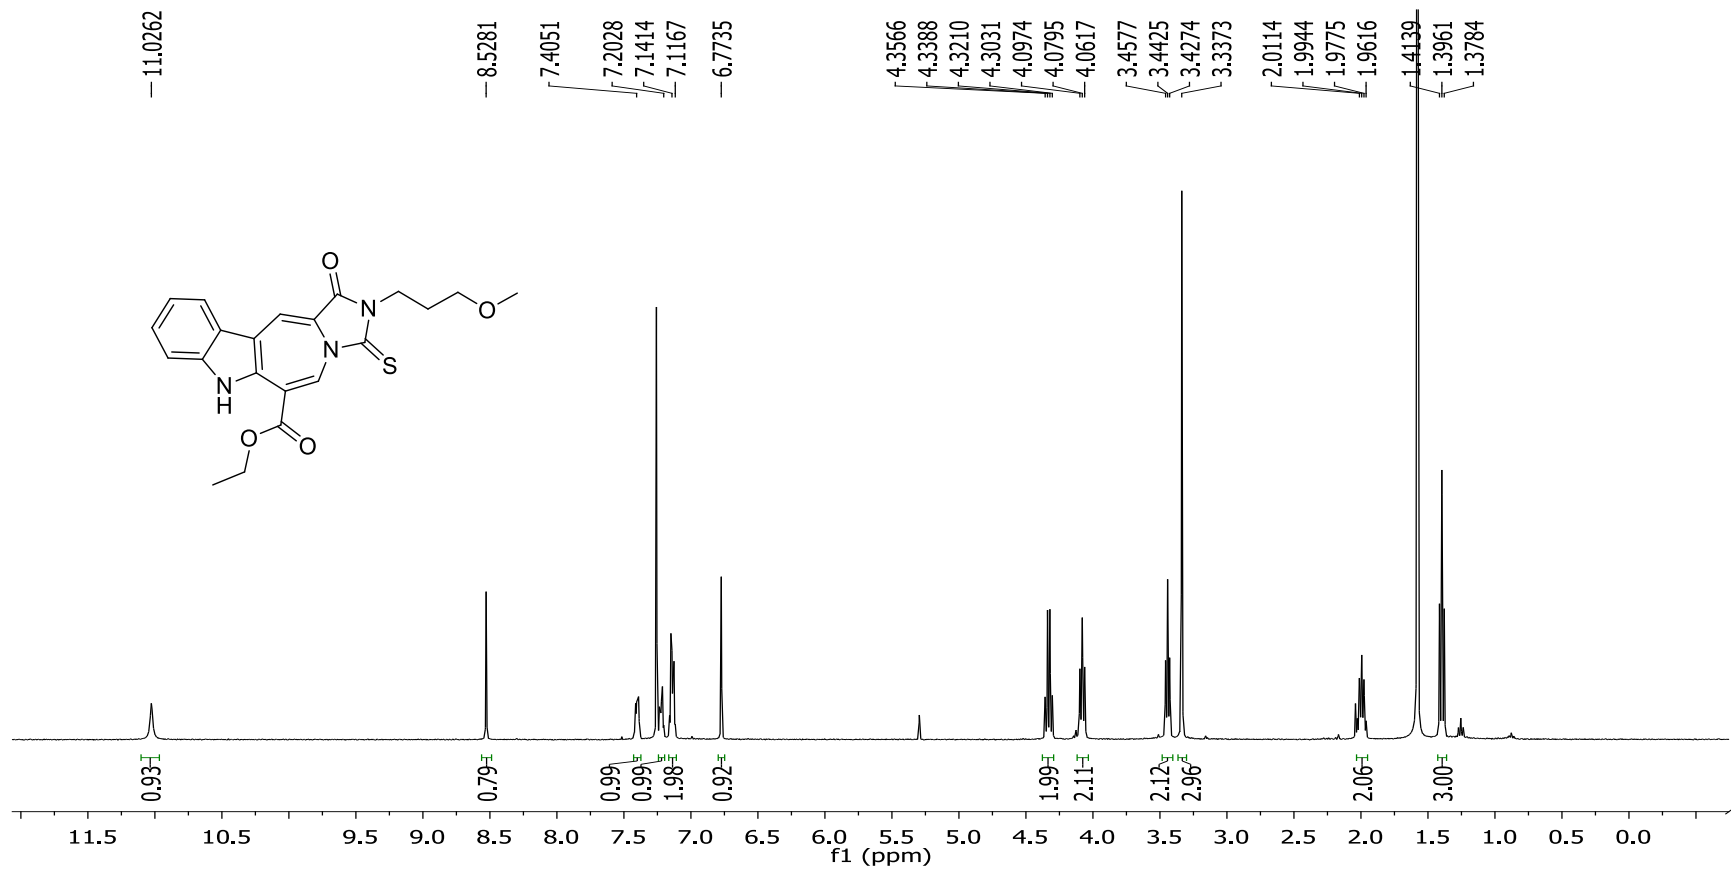

$^1\text{H}$  NMR spectrum (400 MHz) of compound **7d'** in  $\text{CDCl}_3$



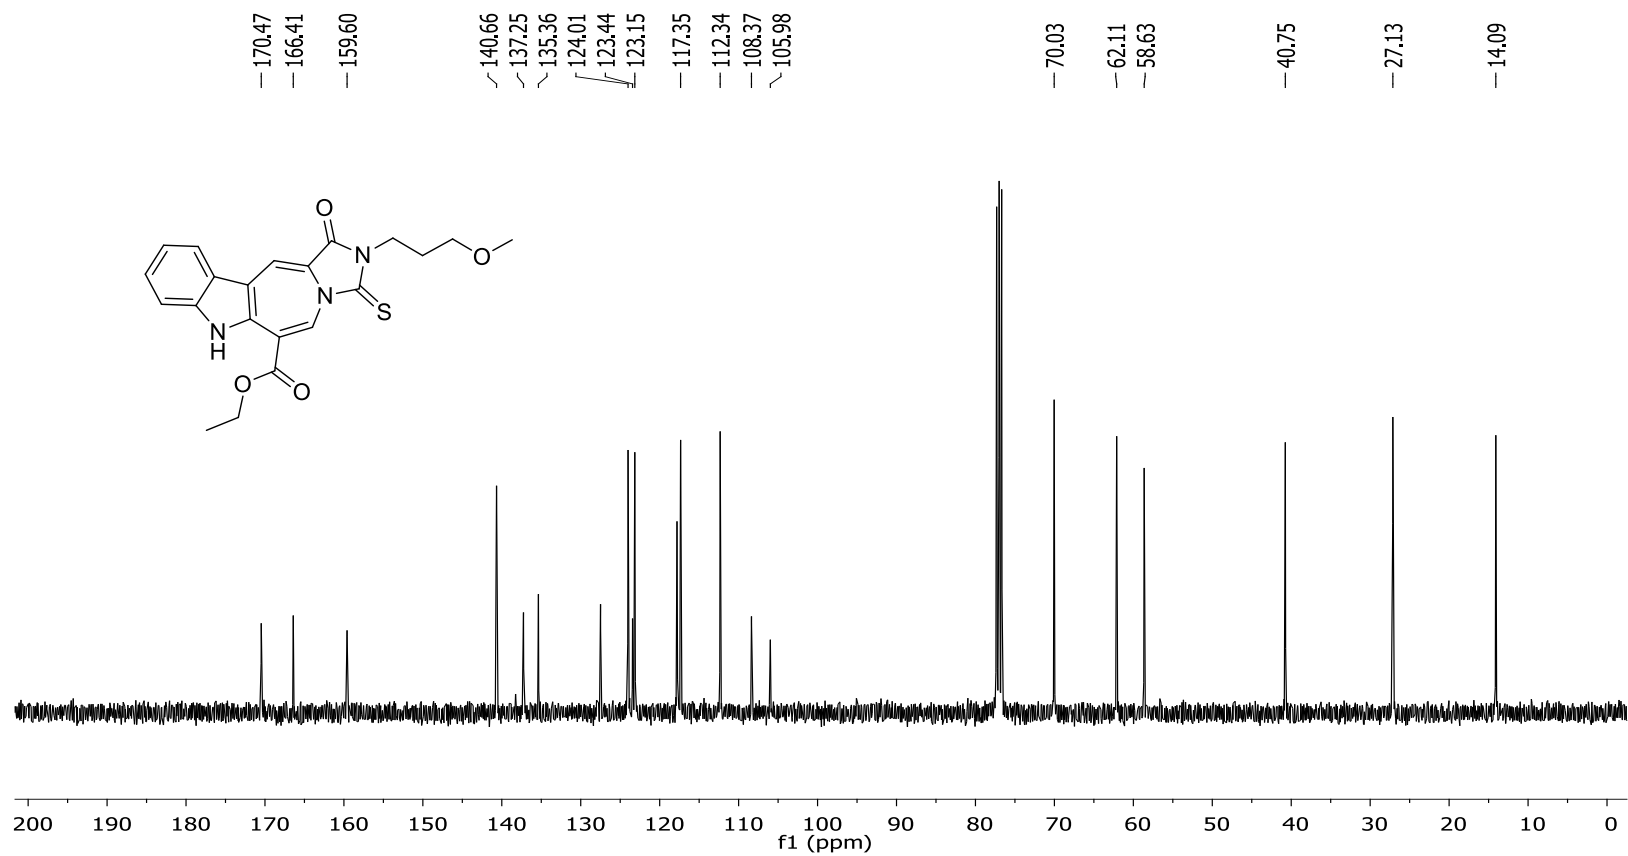

$^{13}\text{C}$  NMR spectrum (101 MHz) of compound **7d'** in  $\text{CDCl}_3$

2014091715\_TT-LN2-09 #339 RT: 1.18 AV: 1 NL: 1.20E7  
T: {0,0} + c EI Full ms [50.00-900.00]

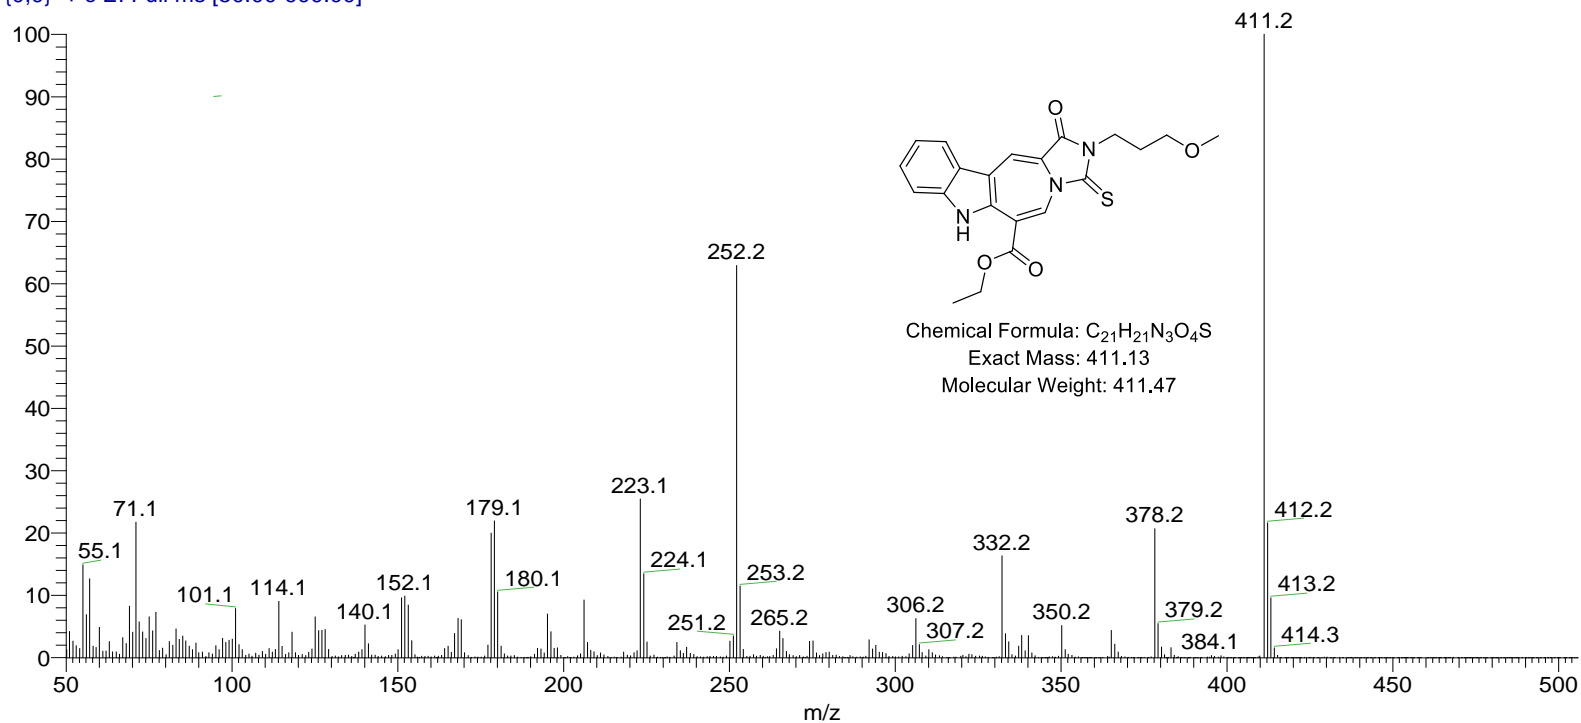

EI-LRMS of compound 7d'

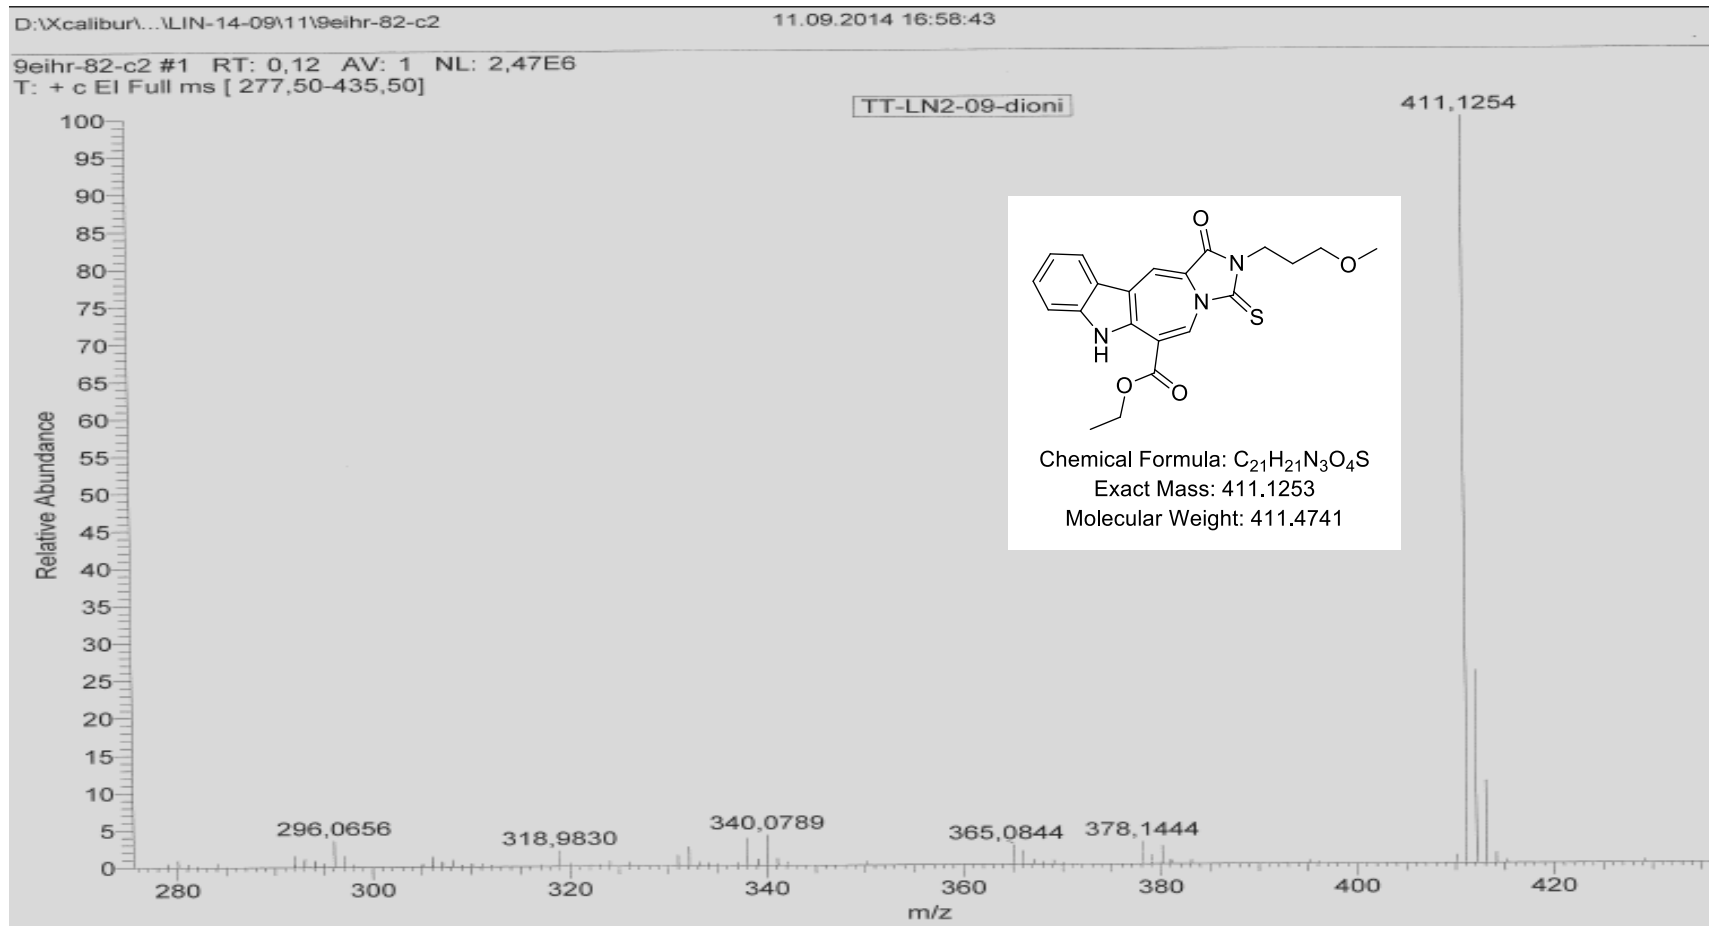

EI-HRMS of compound 7d'

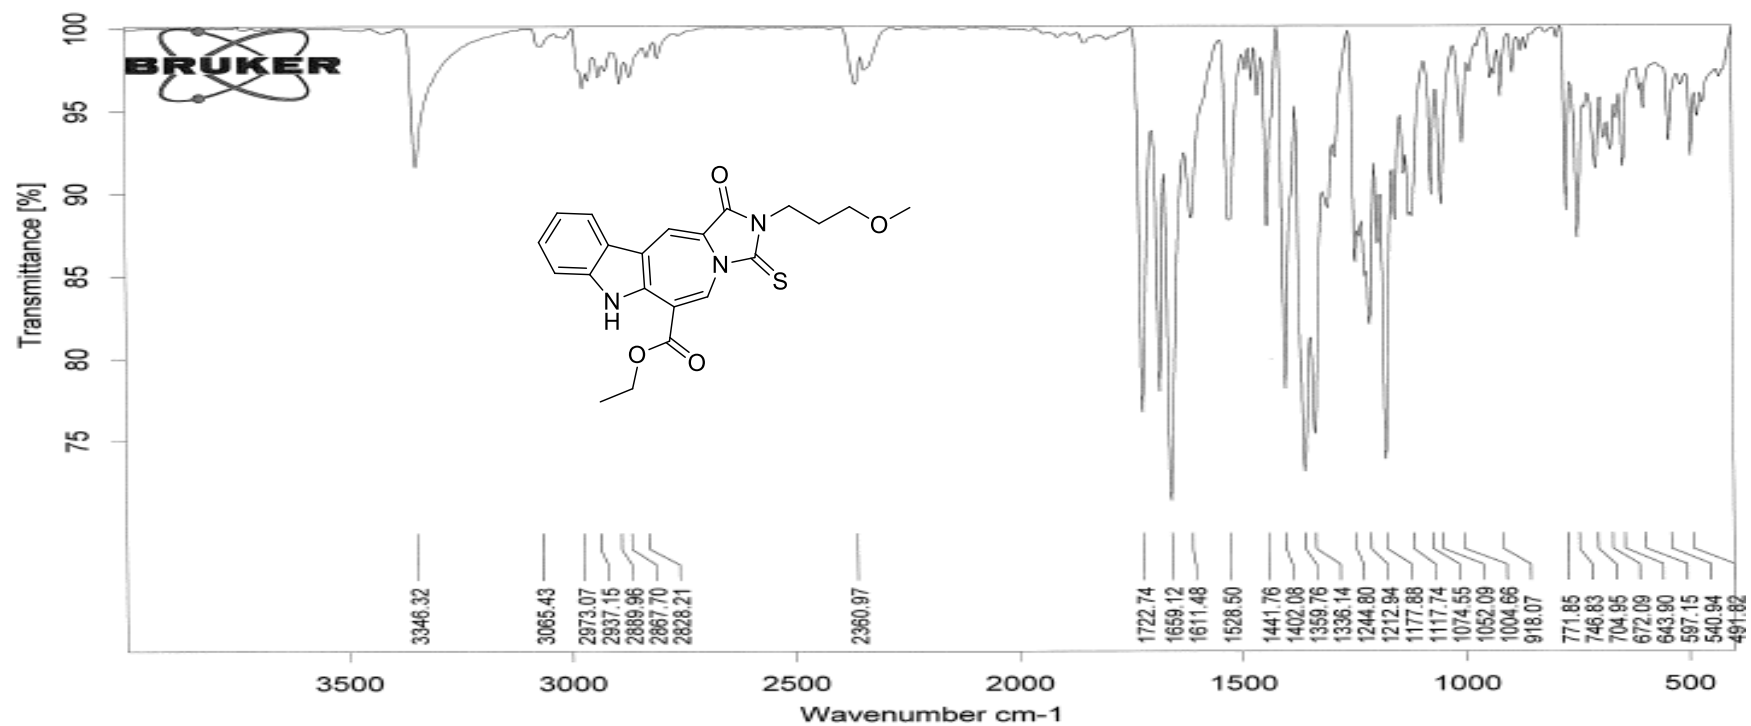

D:\temp-files\FTIR files\20140904\MIR\_TR\_DTGS\_blank KBr\_TT-LN2-09-DIOXY.0

MIR\_TR\_DTGS\_blank KBr\_TT-LN2-09-DIOXY

Instru 2014/9/4

IR spectrum of compound 7d'

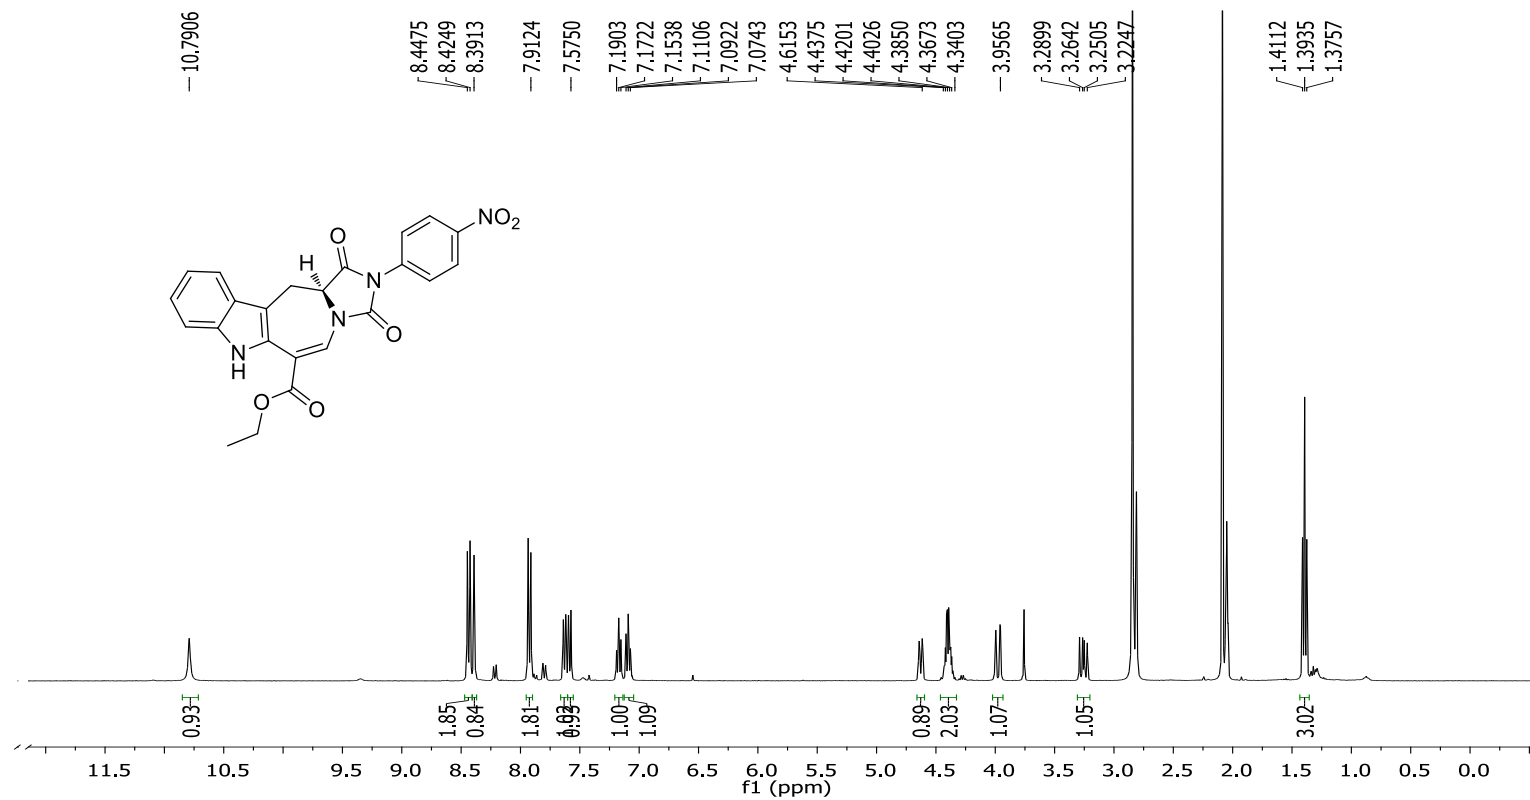

$^1\text{H}$  NMR spectrum (400 MHz) of compound **7e** in acetone- $\text{d}_6$

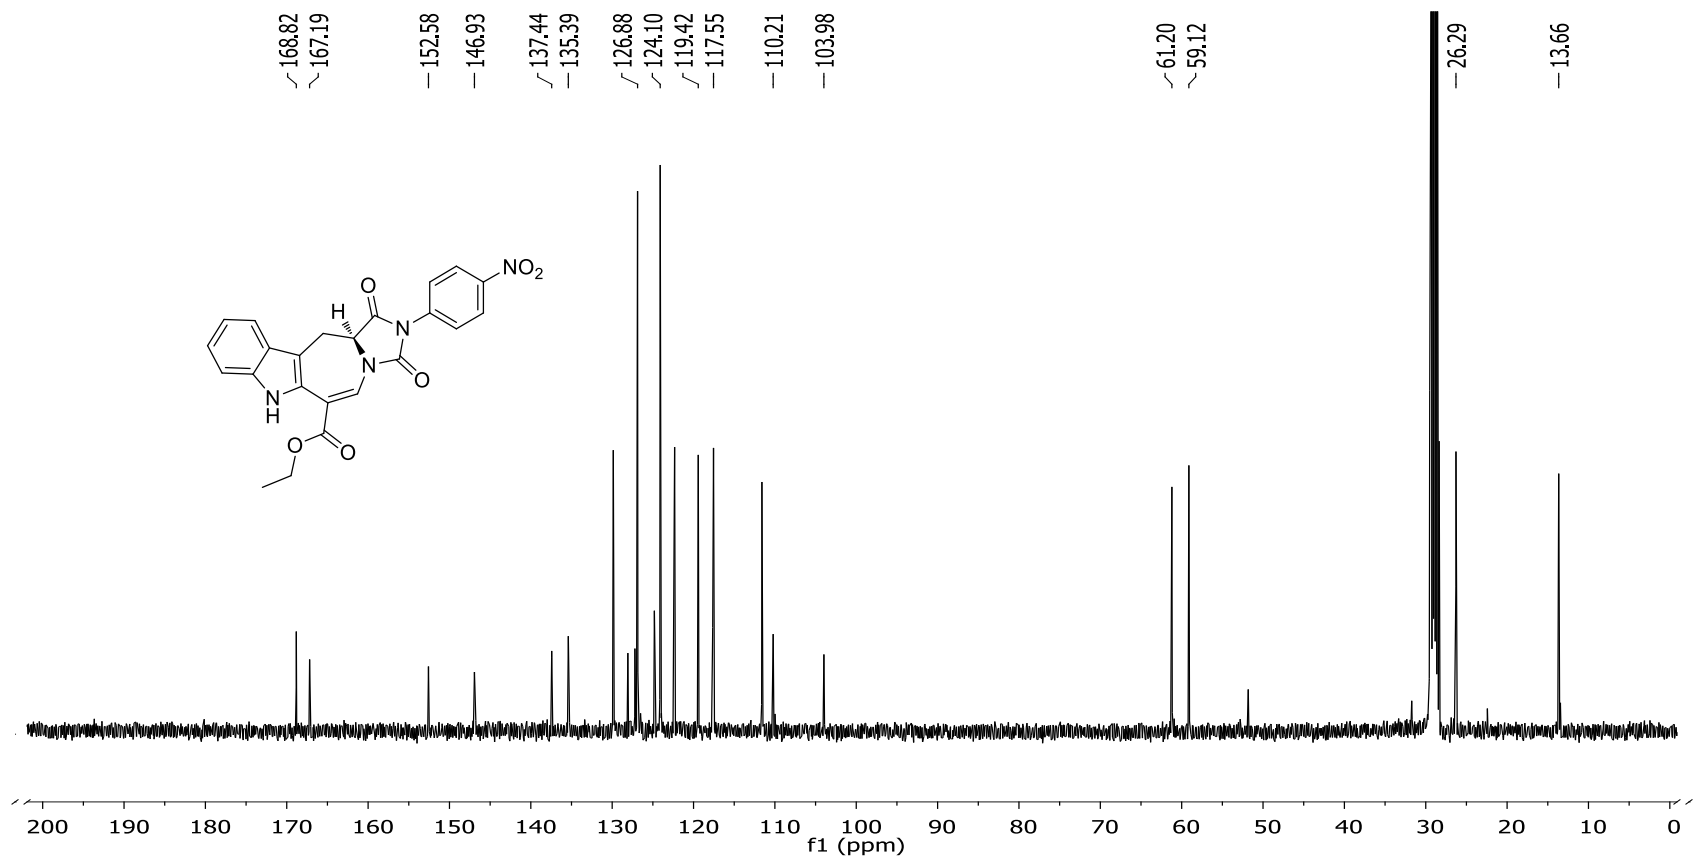

$^{13}\text{C}$  NMR spectrum (101 MHz) of compound **7e** in acetone- $\text{d}_6$

201406162704\_LN2-D19 #408-436 RT: 1.42-1.51 AV: 29 SB: 50 0.89-1.06 NL: 4.42E6  
T: {0,0} + c EI Full ms [50.00-900.00]

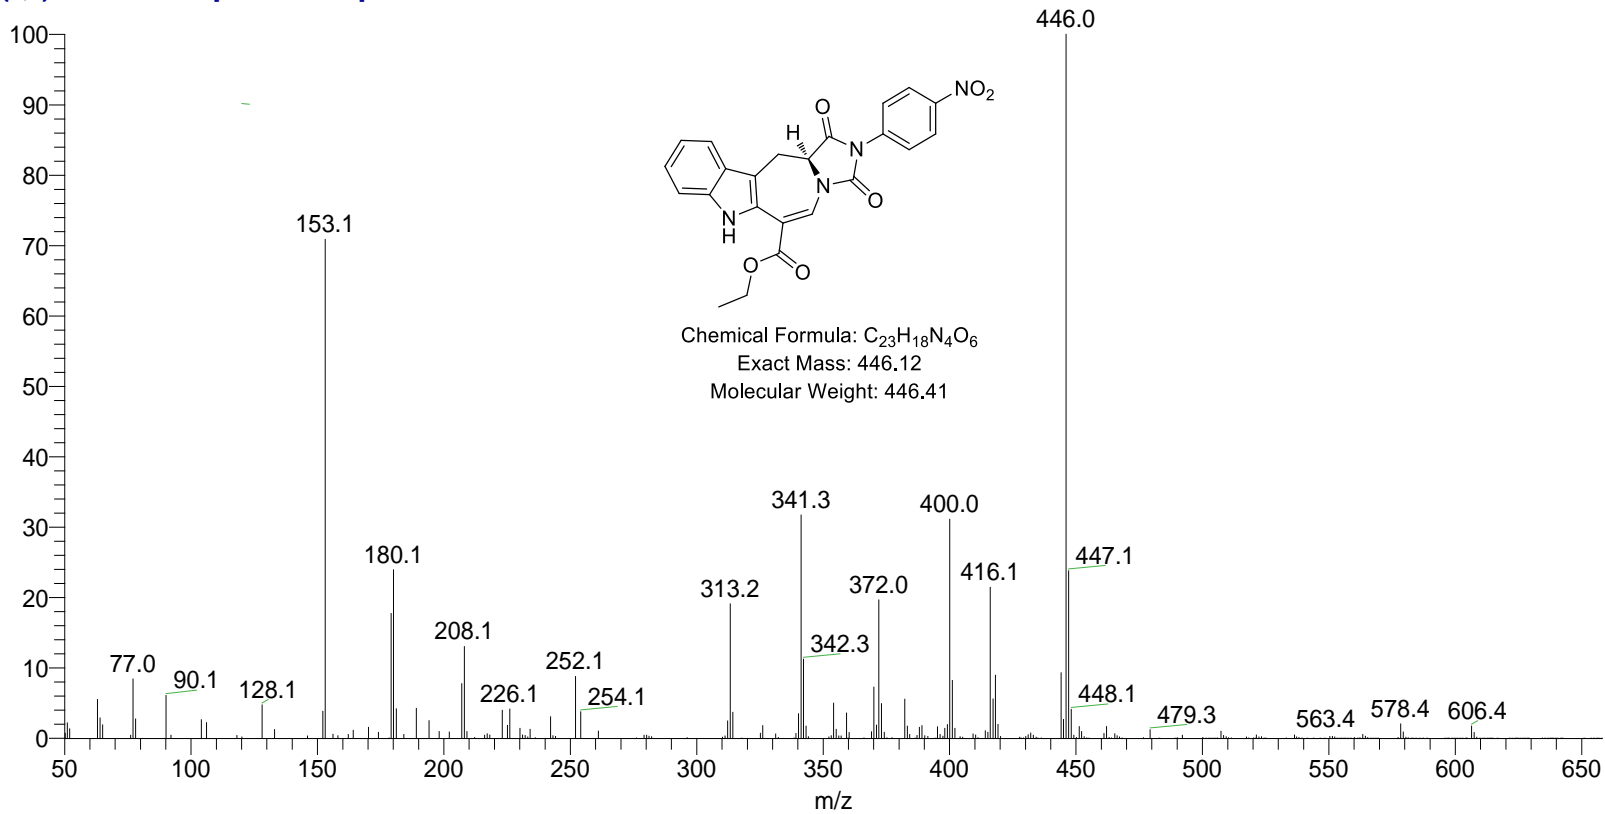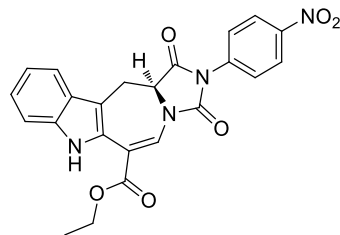

Chemical Formula: C<sub>23</sub>H<sub>18</sub>N<sub>4</sub>O<sub>6</sub>  
Exact Mass: 446.12  
Molecular Weight: 446.41

EI-LRMS of compound **7e**

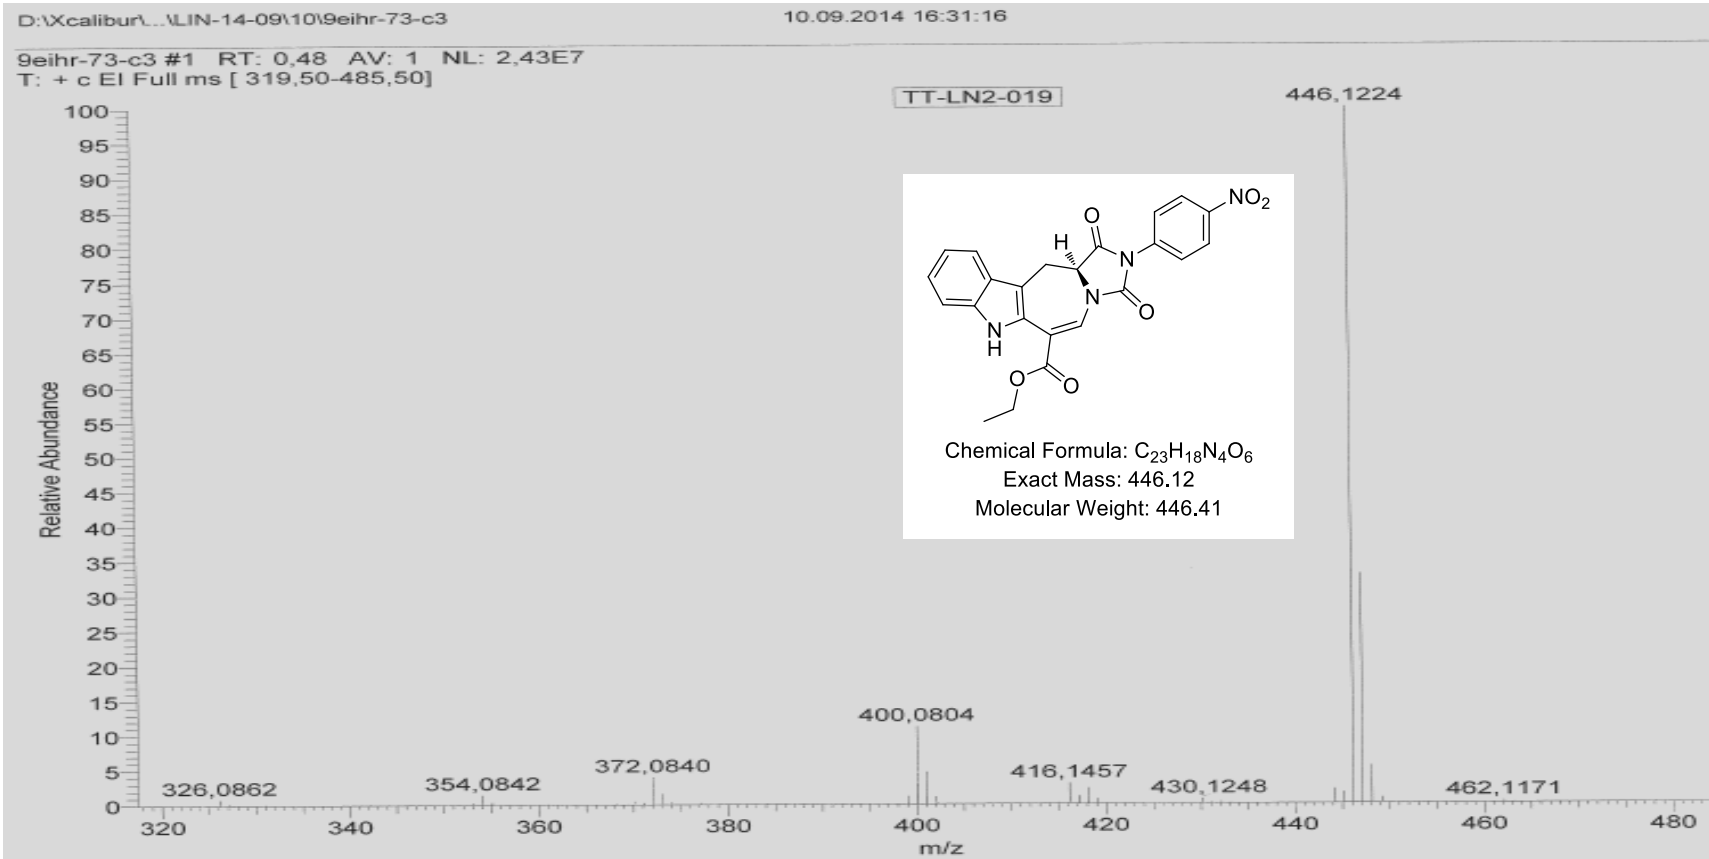

EI-HRMS of compound **7e**



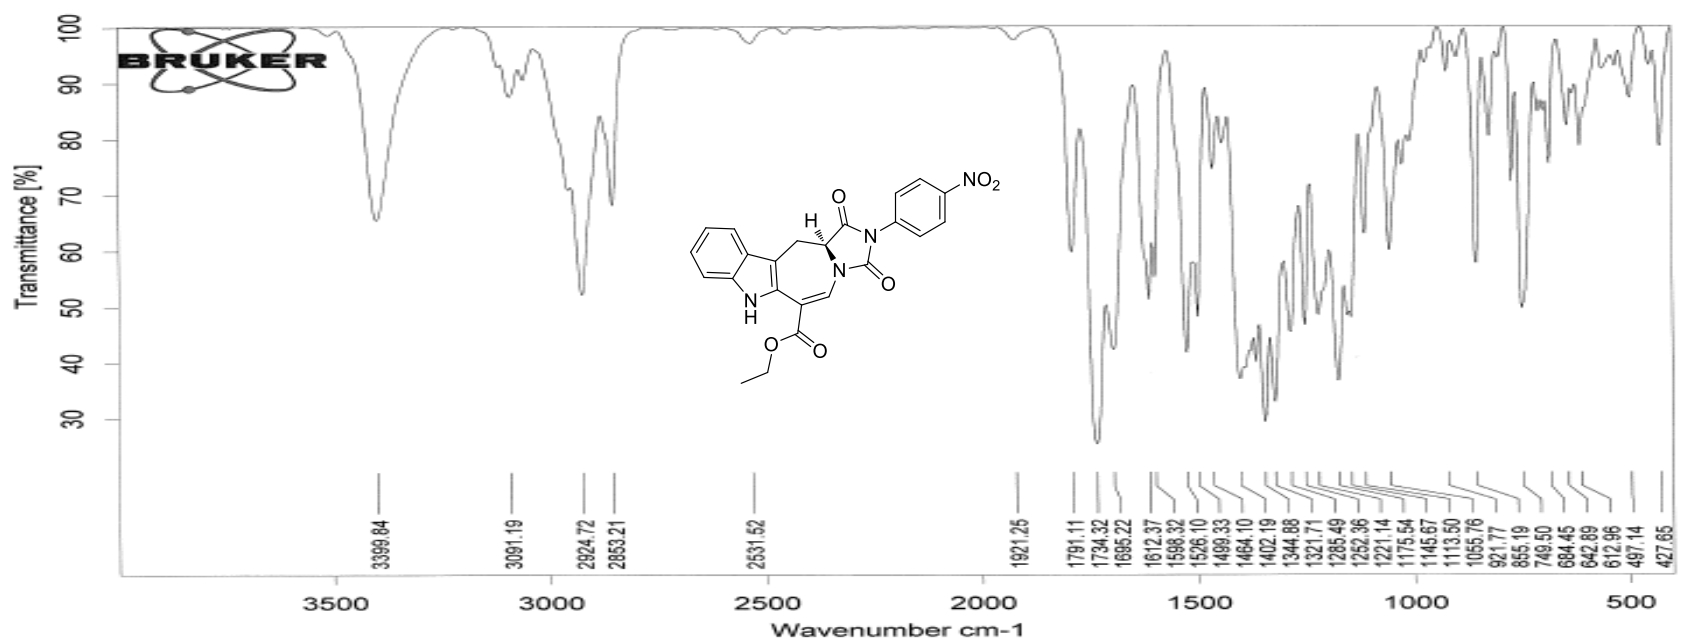

|                                                                      |                                  |                    |          |
|----------------------------------------------------------------------|----------------------------------|--------------------|----------|
| D:\temp-files\FTIR files\20140904\MIR_TR_DTGS_blank KBr_TT-LN2-019.0 | MIR_TR_DTGS_blank KBr_TT-LN2-019 | Instrument type an | 2014/9/4 |
|----------------------------------------------------------------------|----------------------------------|--------------------|----------|

IR spectrum of compound **7e**

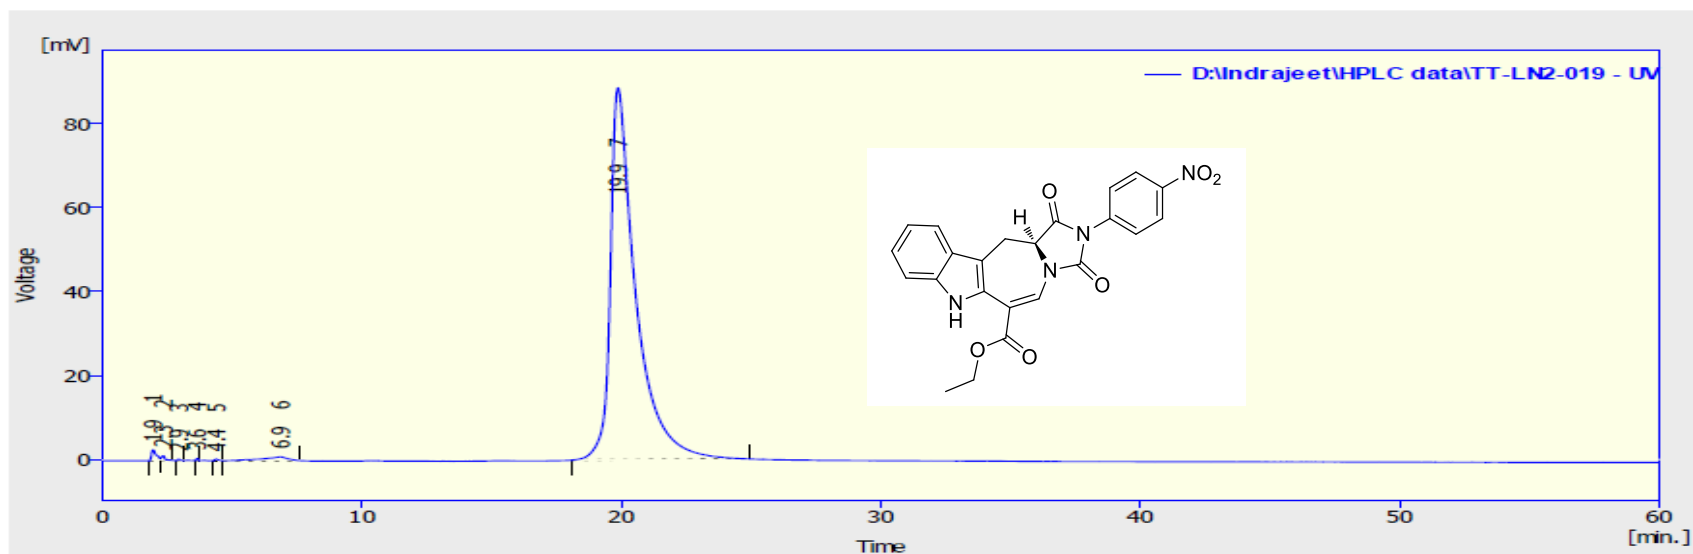

Result Table (Uncal - D:\Indrajeet\HPLC data\TT-LN2-019 - UV)

|   | Reten. Time [min] | Area [mV.s] | Height [mV] | Area [%] | Height [%] |
|---|-------------------|-------------|-------------|----------|------------|
| 1 | 1.948             | 33.752      | 2.553       | 0.5      | 2.7        |
| 2 | 2.344             | 10.666      | 1.126       | 0.2      | 1.2        |
| 3 | 2.936             | 2.330       | 0.328       | 0.0      | 0.3        |
| 4 | 3.644             | 2.267       | 0.447       | 0.0      | 0.5        |
| 5 | 4.384             | 3.304       | 0.369       | 0.1      | 0.4        |
| 6 | 6.864             | 57.905      | 0.892       | 0.9      | 0.9        |
| 7 | 19.868            | 6032.542    | 88.426      | 98.2     | 93.9       |
|   | Total             | 6142.768    | 94.143      | 100.0    | 100.0      |

HPLC of compound 7e

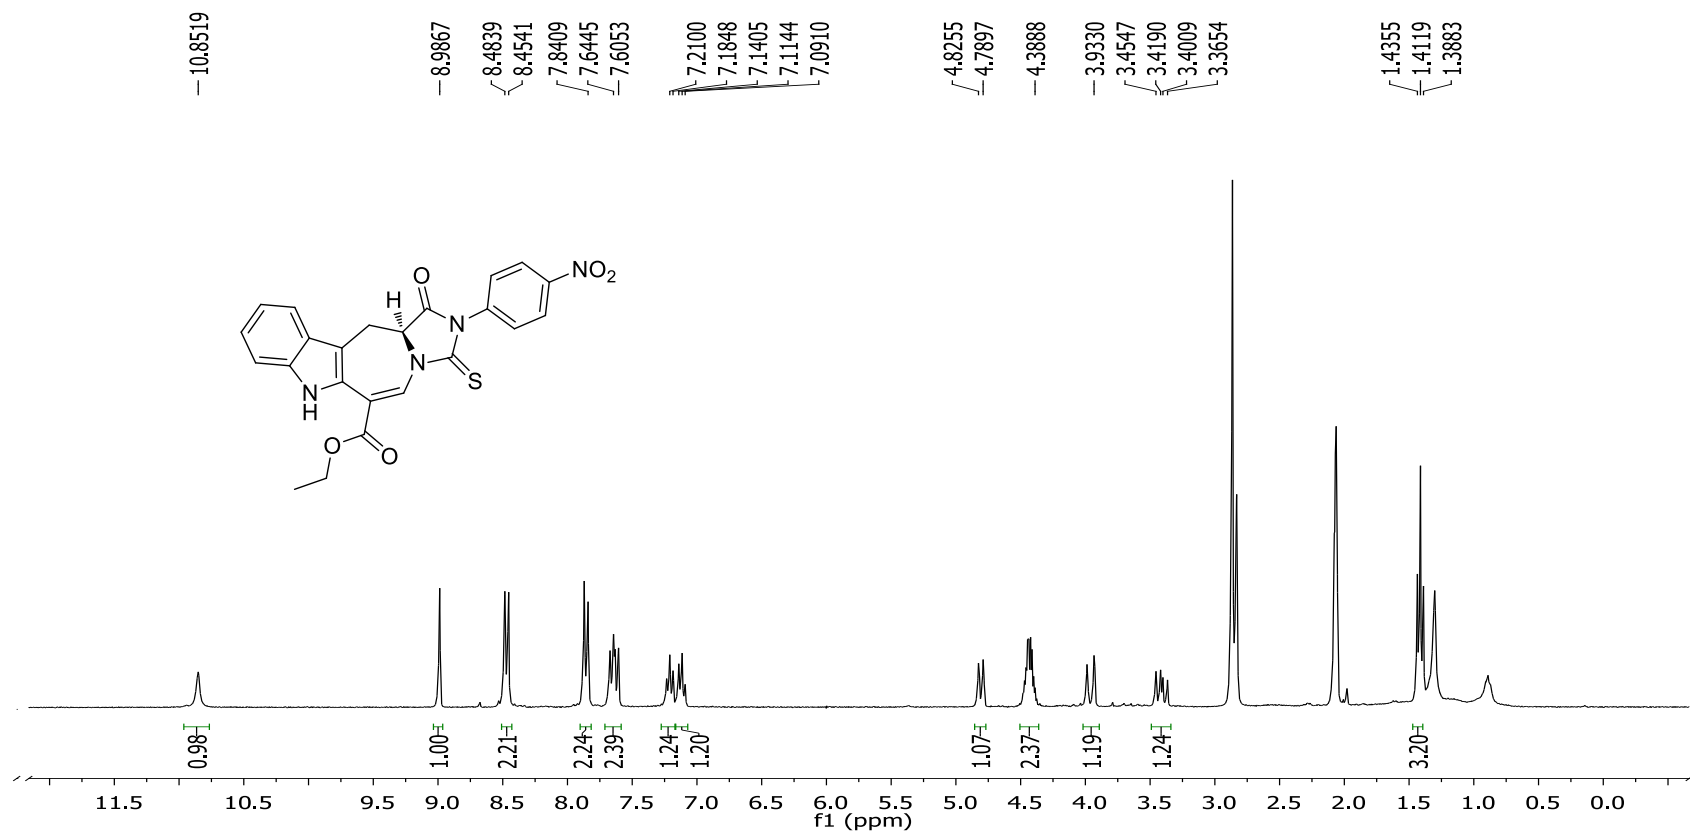

<sup>1</sup>H NMR spectrum (300 MHz) of compound **7f** in acetone-d<sub>6</sub>

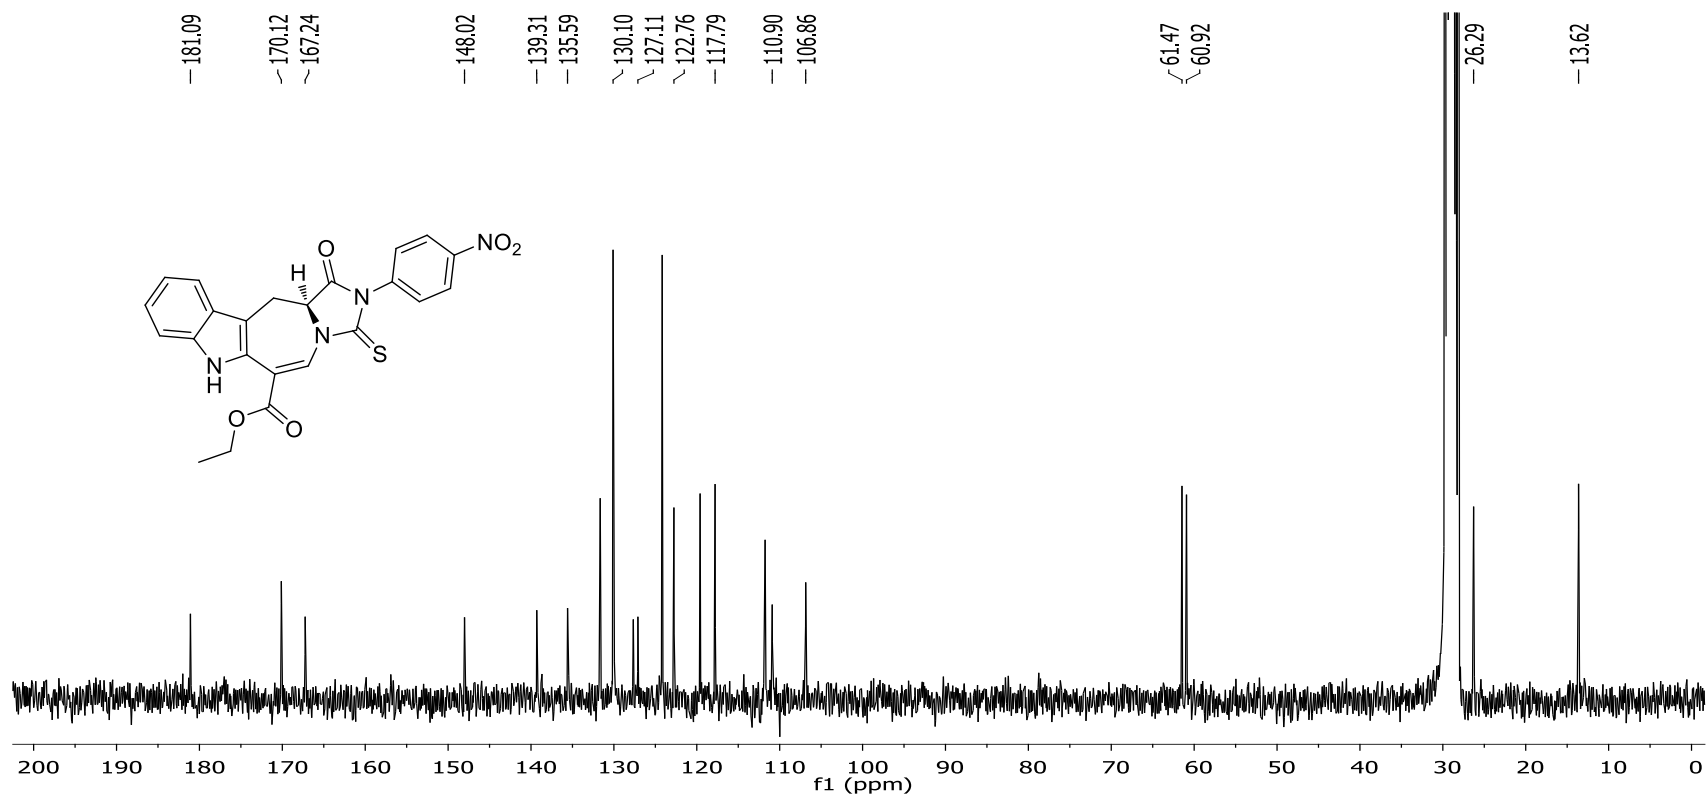

$^{13}\text{C}$  NMR spectrum (75 MHz) of compound **7f** in acetone- $\text{d}_6$

2014012205\_ib-N6-085(I) #411 RT: 1.43 AV: 1 NL: 8.73E7  
T: {0,0} + c EI Full ms [50.00-900.00]

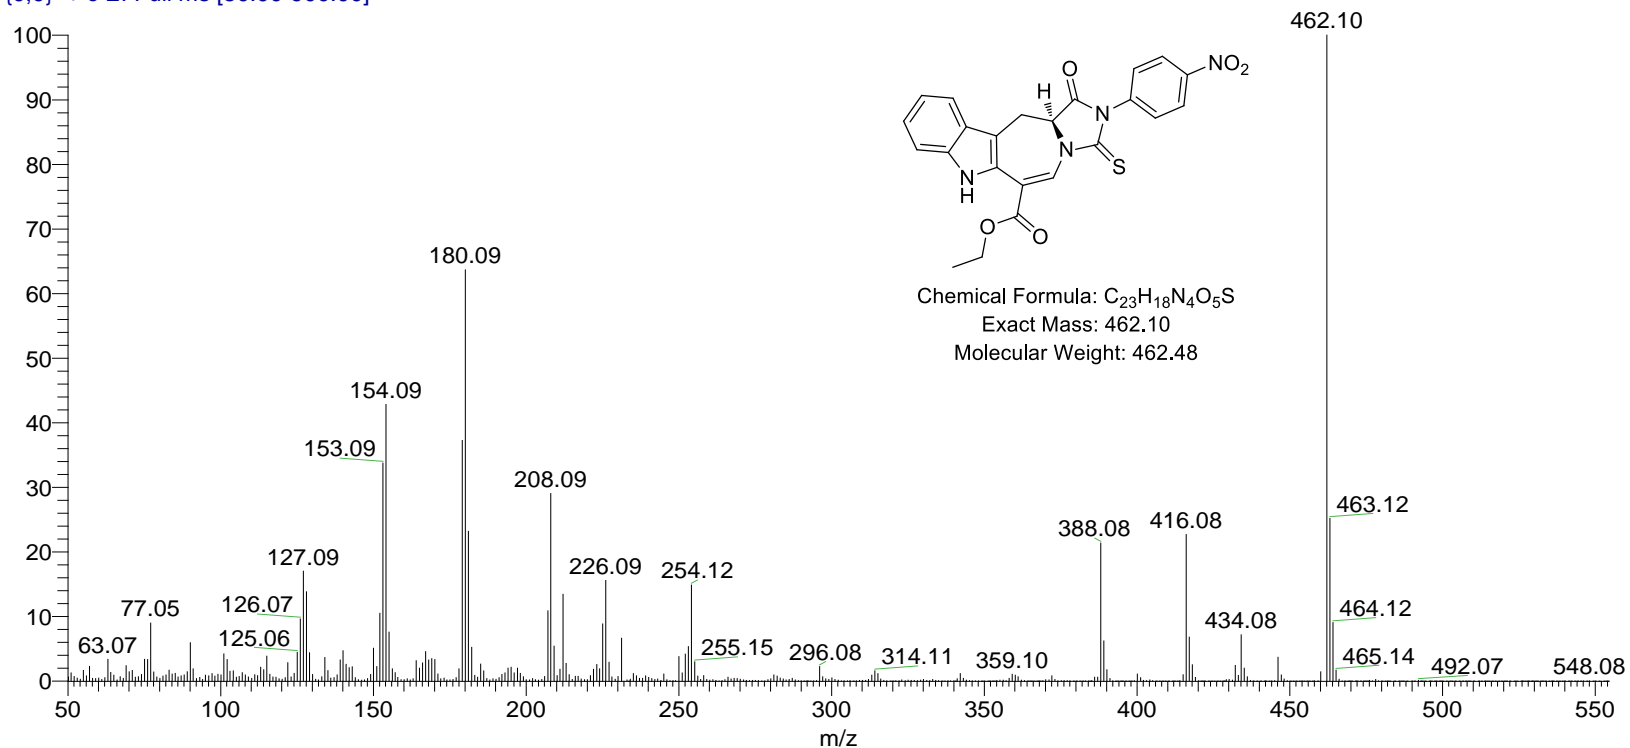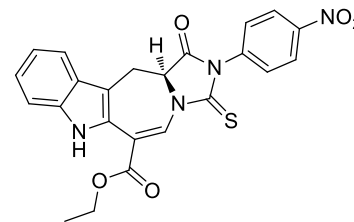

Chemical Formula: C<sub>23</sub>H<sub>18</sub>N<sub>4</sub>O<sub>5</sub>S  
Exact Mass: 462.10  
Molecular Weight: 462.48

EI-LRMS of compound **7f**

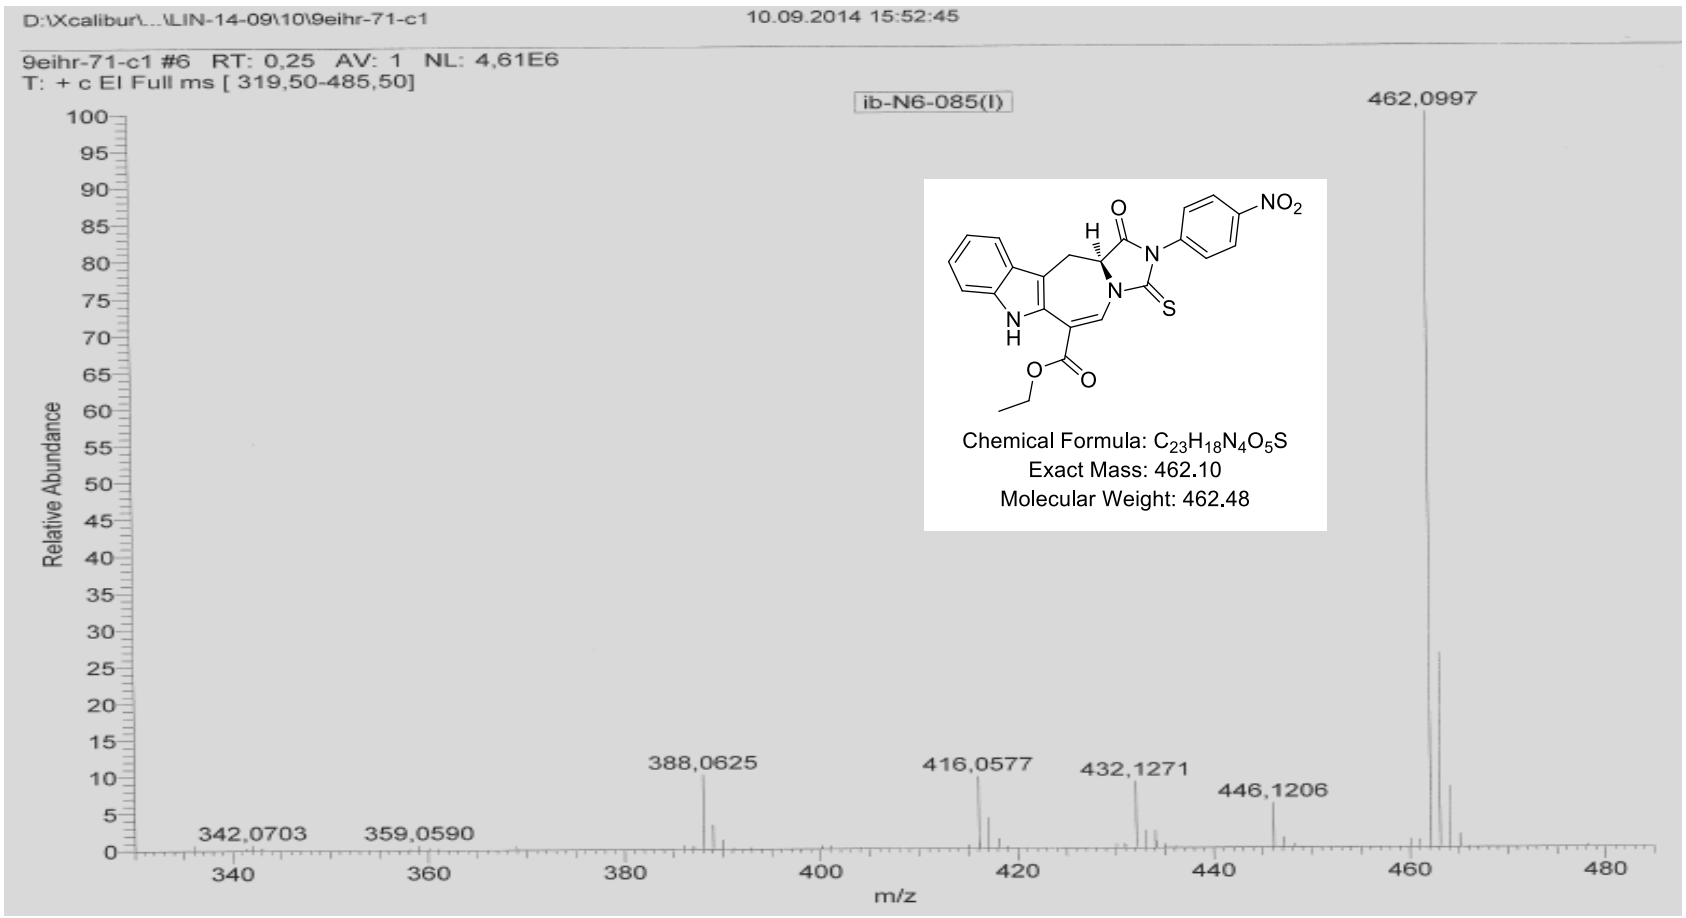

EI-HRMS of compound **7f**

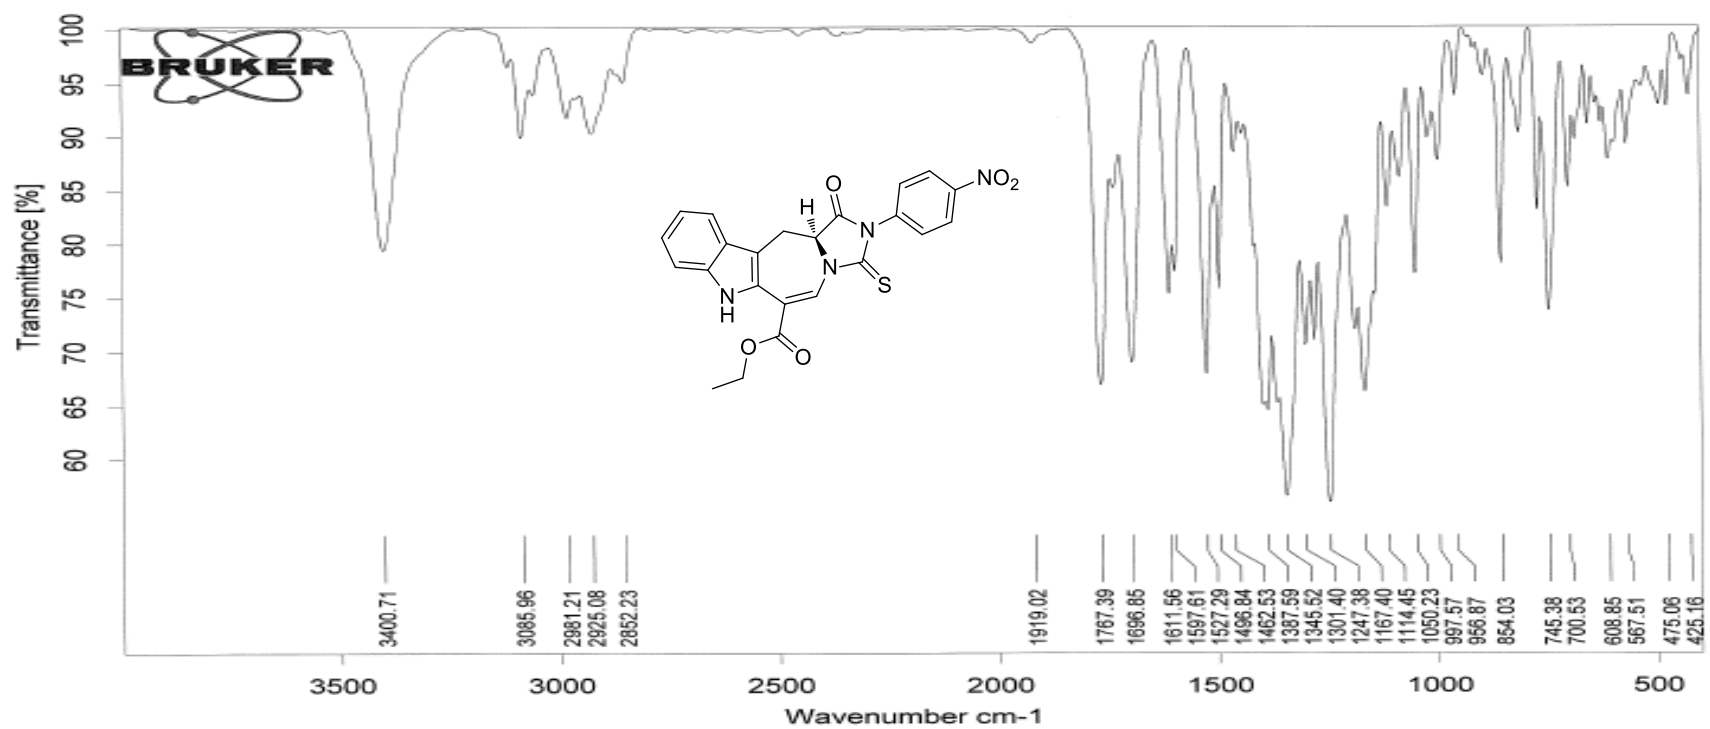

|                                                                       |                                   |                       |          |
|-----------------------------------------------------------------------|-----------------------------------|-----------------------|----------|
| D:\temp-files\FTIR files\20140904\MIR_TR_DTGS_blank KBr_ib-N6-85(I).0 | MIR_TR_DTGS_blank KBr_ib-N6-85(I) | Instrument type and / | 2014/9/4 |
|-----------------------------------------------------------------------|-----------------------------------|-----------------------|----------|

IR spectrum of compound 7f

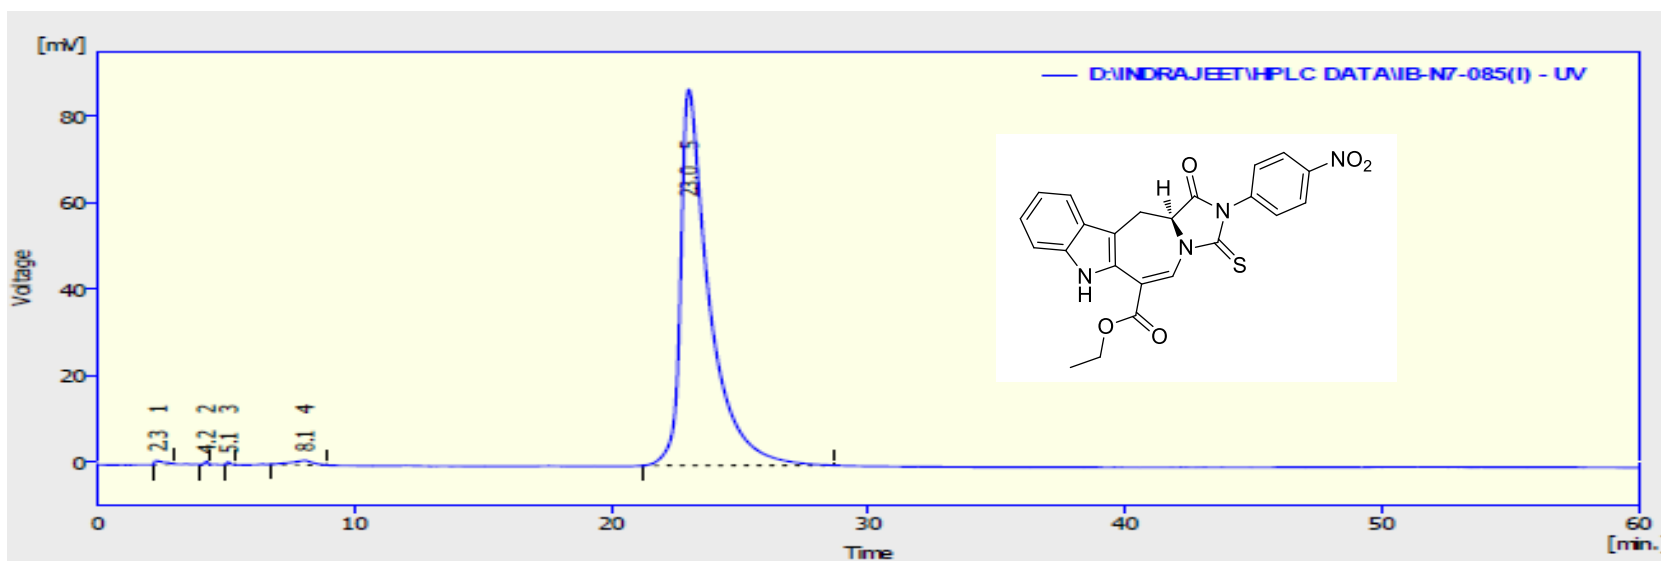

Result Table (Uncal - D:\INDRAJEET\HPLC DATA\IB-N7-085(I) - UV)

|   | Reten. Time [min] | Area [mV.s] | Height [mV] | Area [%] | Height [%] |
|---|-------------------|-------------|-------------|----------|------------|
| 1 | 2.324             | 20.669      | 0.853       | 0.3      | 0.9        |
| 2 | 4.232             | 4.666       | 0.690       | 0.1      | 0.8        |
| 3 | 5.000             | 5.681       | 0.634       | 0.1      | 0.7        |
| 4 | 8.060             | 55.355      | 1.011       | 0.8      | 1.1        |
| 5 | 23.020            | 6710.792    | 87.037      | 98.7     | 96.5       |
|   | Total             | 6797.163    | 90.233      | 100.0    | 100.0      |

HPLC of compound 7f



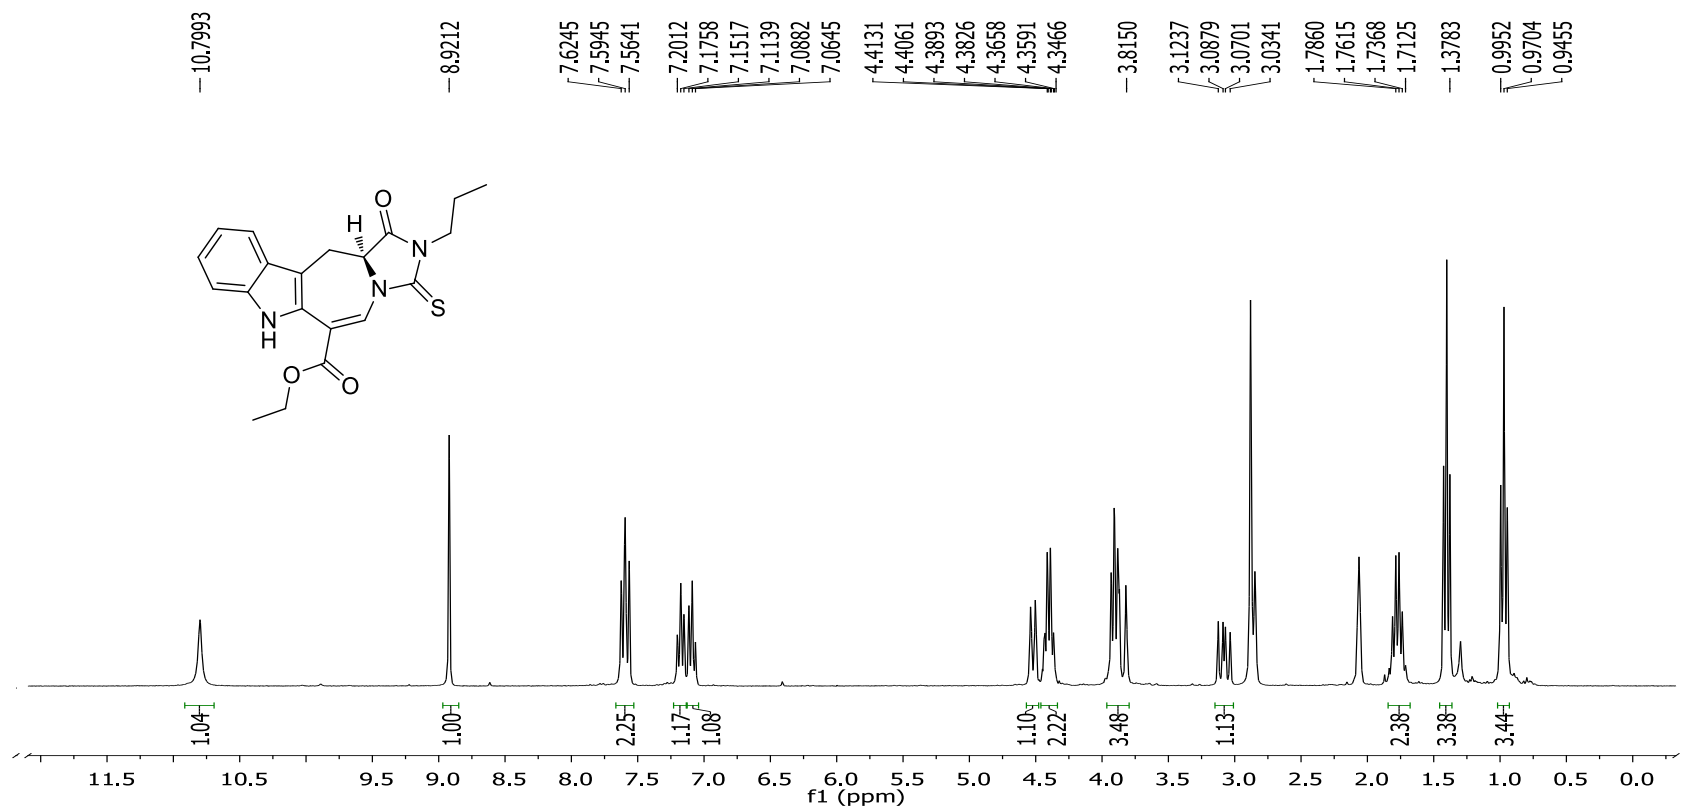

$^1\text{H}$  NMR spectrum (300 MHz) of compound **7g** in acetone- $\text{d}_6$

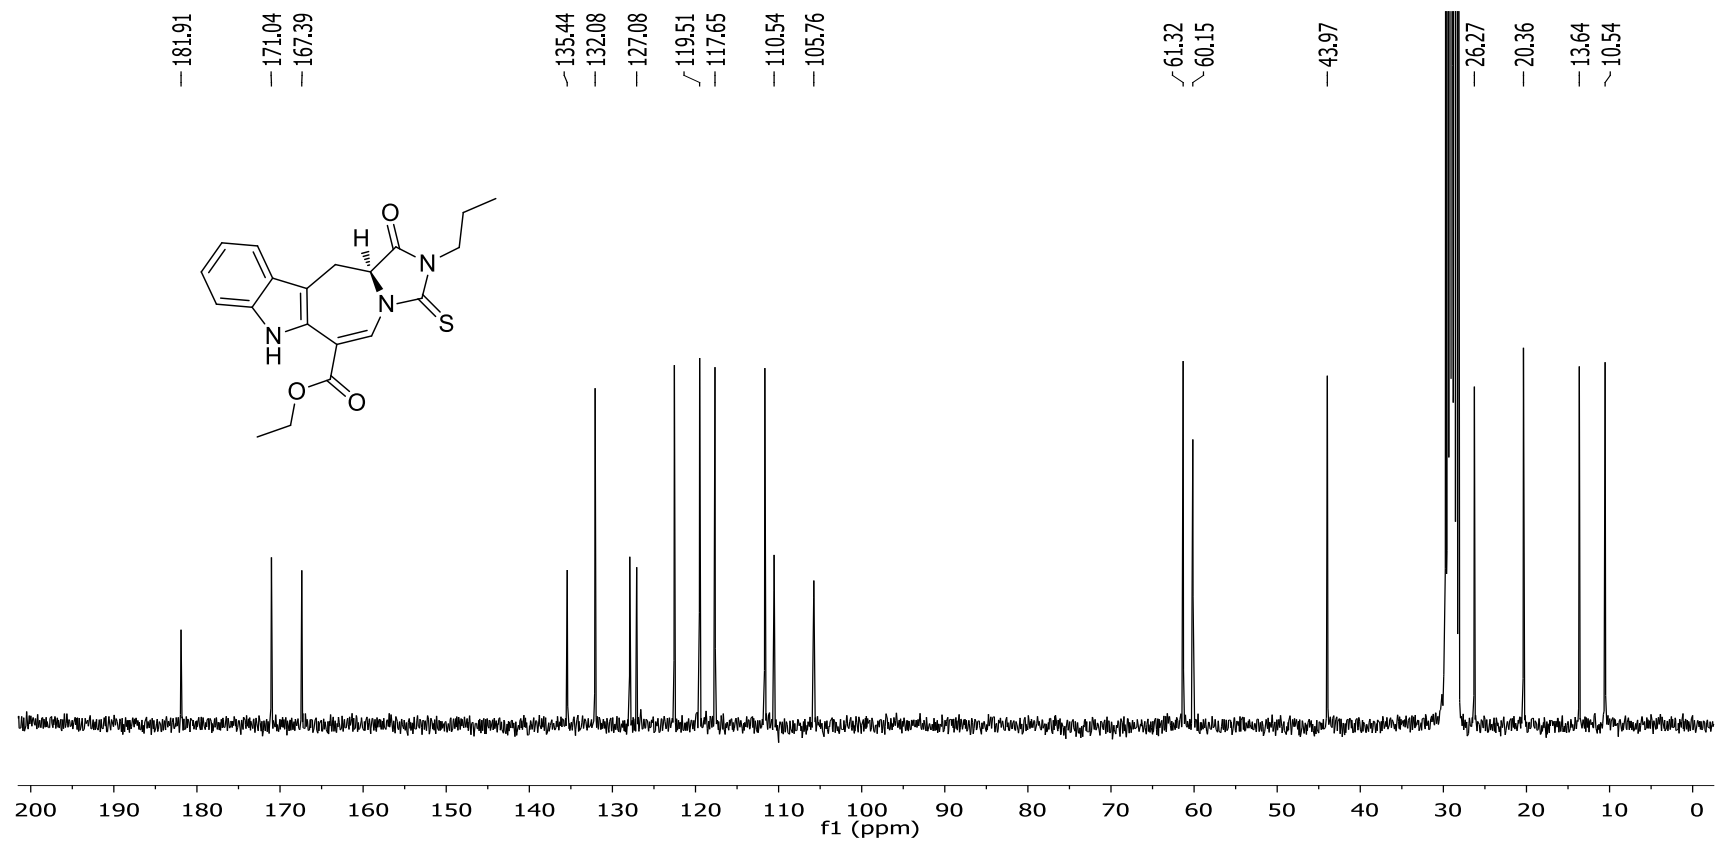

$^{13}\text{C}$  NMR spectrum (75 MHz) of compound **7g** in acetone- $\text{d}_6$

2014060303\_ib-N7-043 #288 RT: 1.01 AV: 1 NL: 8.47E7  
T: {0,0} + c EI Full ms [50.00-900.00]

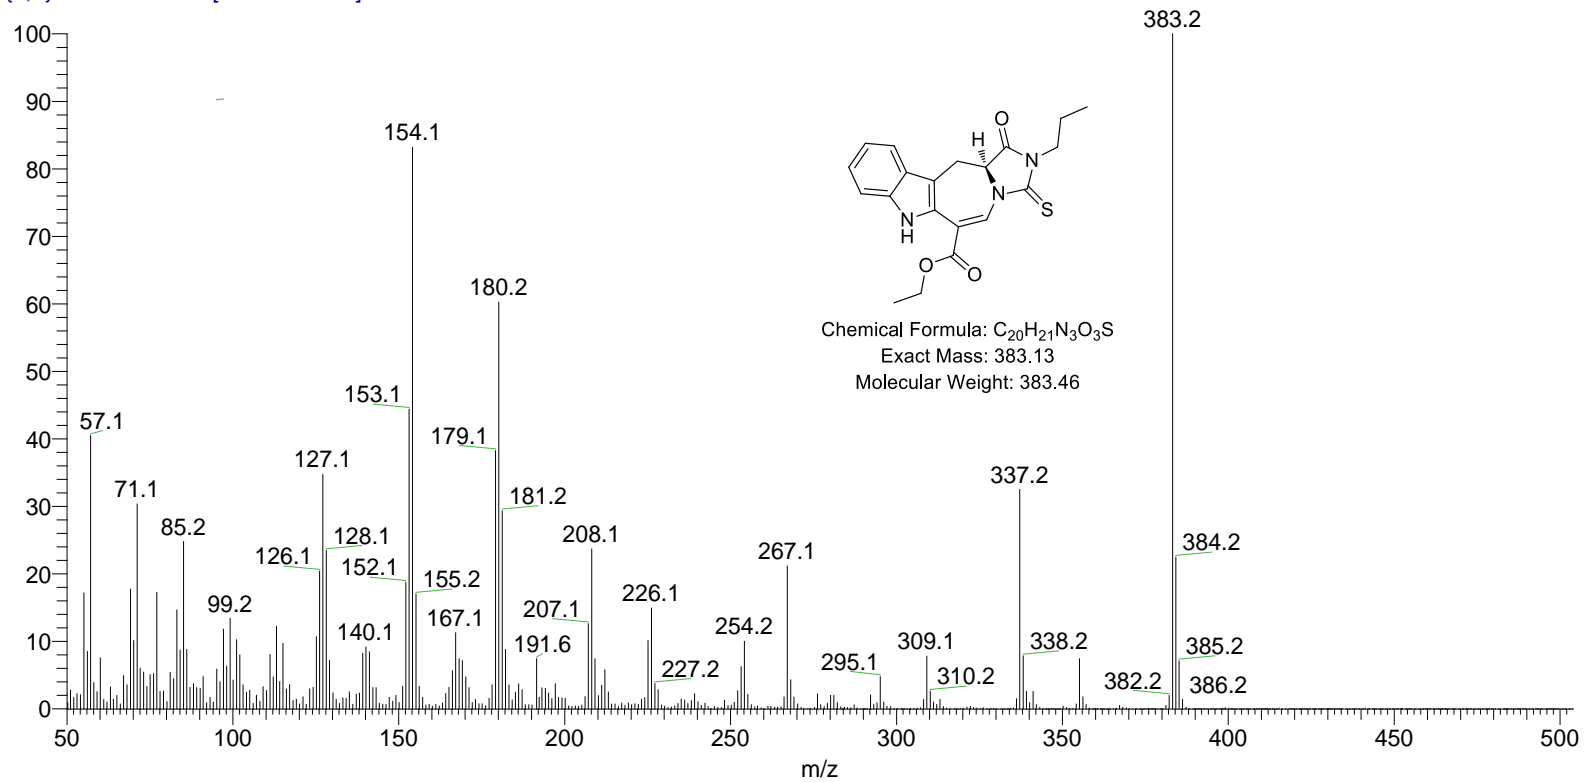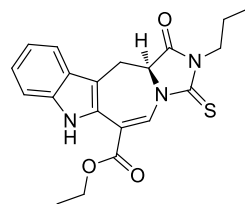

Chemical Formula: C<sub>20</sub>H<sub>21</sub>N<sub>3</sub>O<sub>3</sub>S  
Exact Mass: 383.13  
Molecular Weight: 383.46

EI-LRMS of compound 7g

9eihr-87-c6 #2 RT: 0,09 AV: 1 NL: 1,13E6  
T: + c EI Full ms [ 264,50-410,50]

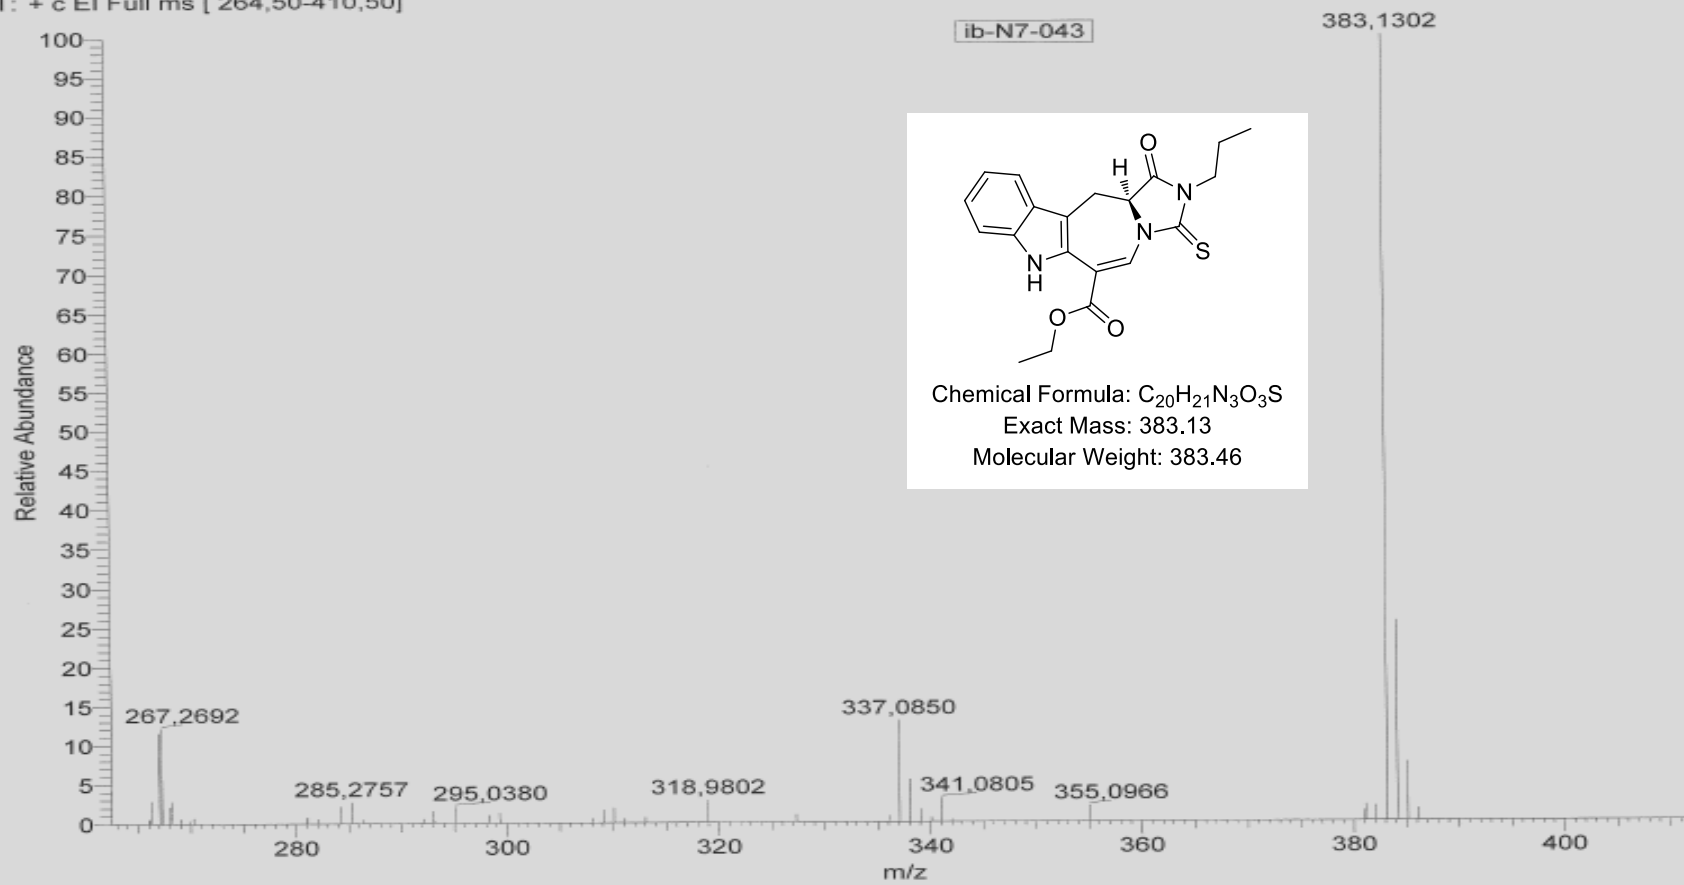

EI-HRMS of compound 7g

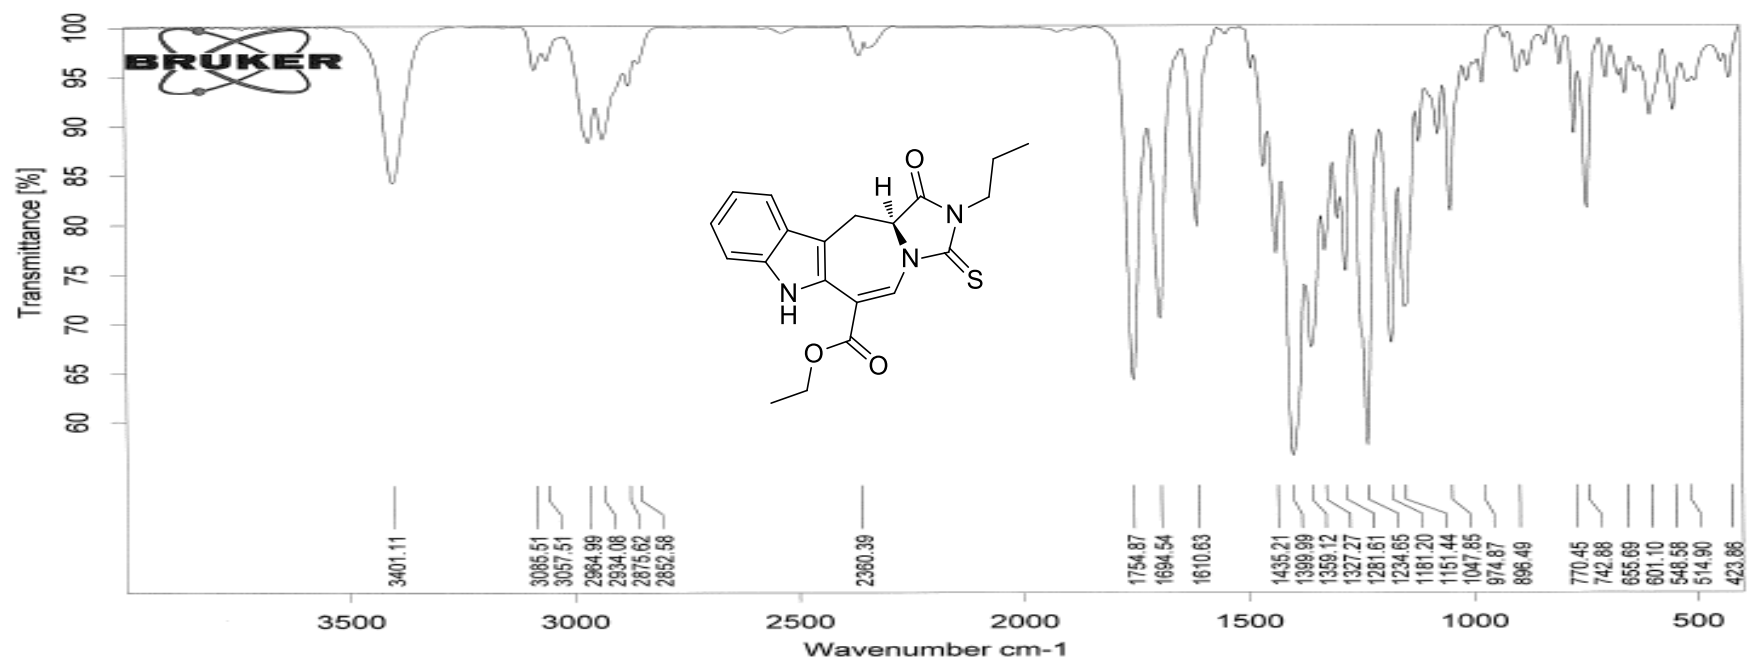

|                                                                     |                                 |                         |          |
|---------------------------------------------------------------------|---------------------------------|-------------------------|----------|
| D:\temp-files\FTIR files\20140904\MIR_TR_DTGS_blank KBr_ib-N7-043.0 | MIR_TR_DTGS_blank KBr_ib-N7-043 | Instrument type and / o | 2014/9/4 |
|---------------------------------------------------------------------|---------------------------------|-------------------------|----------|

IR spectrum of compound 7g

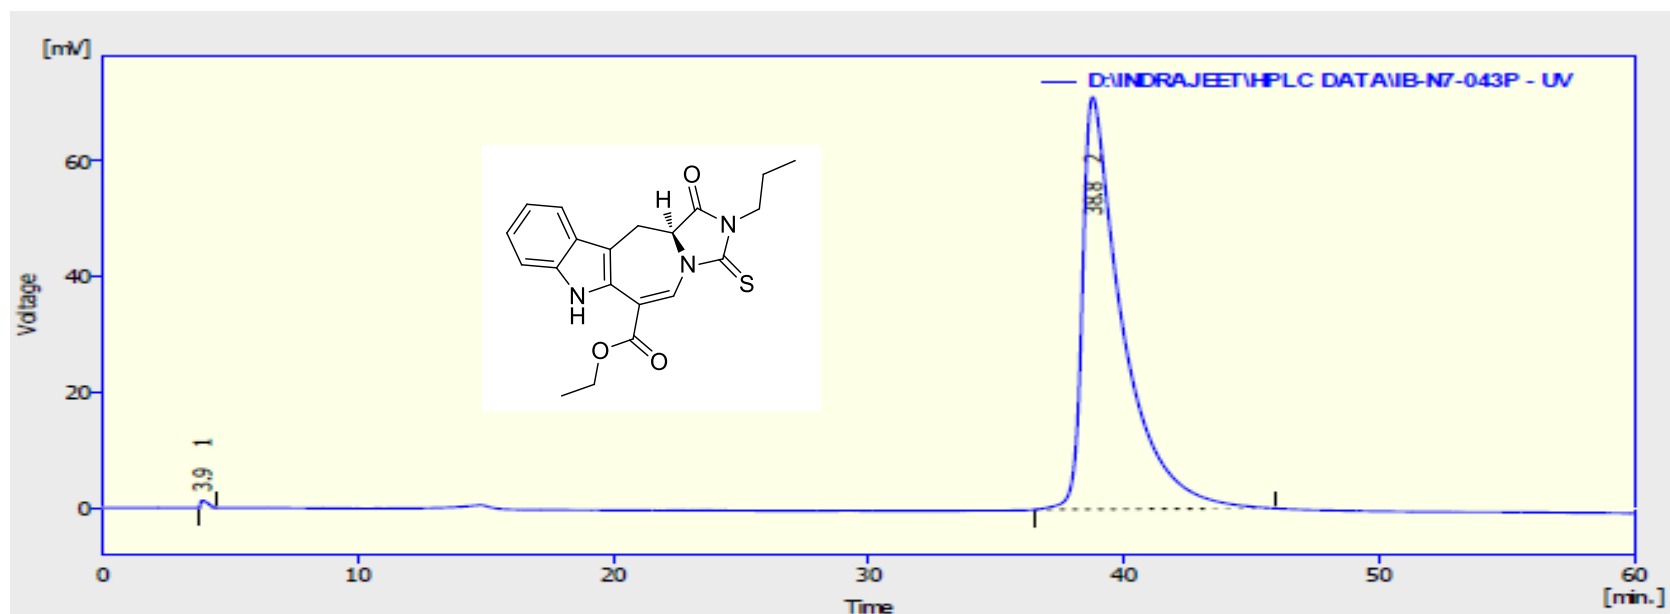

Result Table (Uncal - D:\INDRAJEET\HPLC DATA\IB-N7-043P - UV)

|   | Reten. Time [min] | Area [mV.s] | Height [mV] | Area [%] | Height [%] |
|---|-------------------|-------------|-------------|----------|------------|
| 1 | 3.804             | 26.167      | 1.262       | 0.3      | 1.7        |
| 2 | 38.780            | 7752.907    | 71.369      | 99.7     | 98.3       |
|   | Total             | 7779.074    | 72.632      | 100.0    | 100.0      |

HPLC of compound **7g**

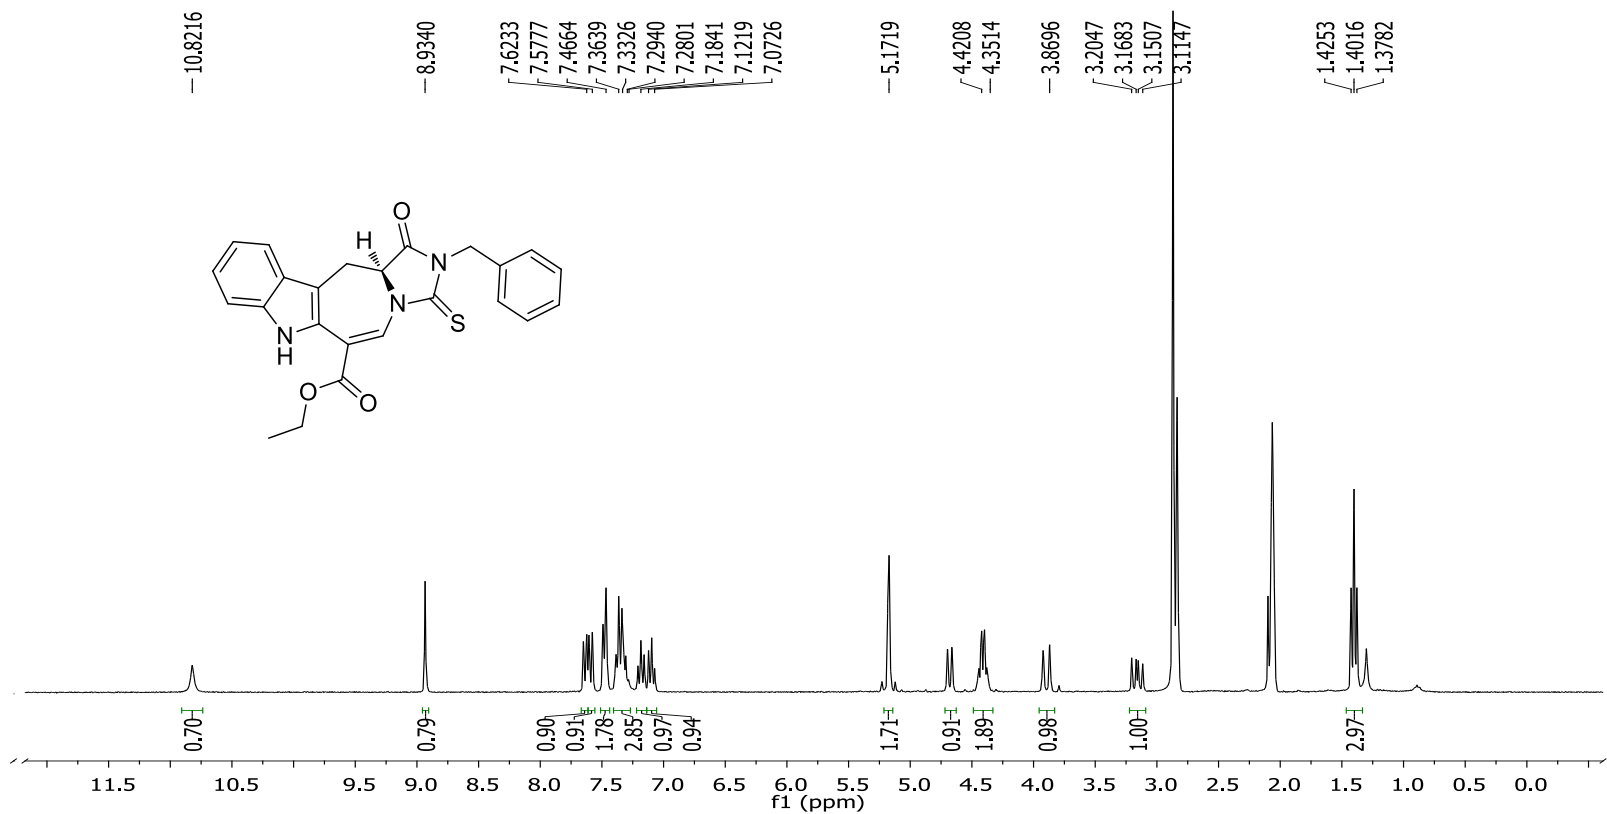

<sup>1</sup>H NMR spectrum (300 MHz) of compound **7h** in acetone-d<sub>6</sub>

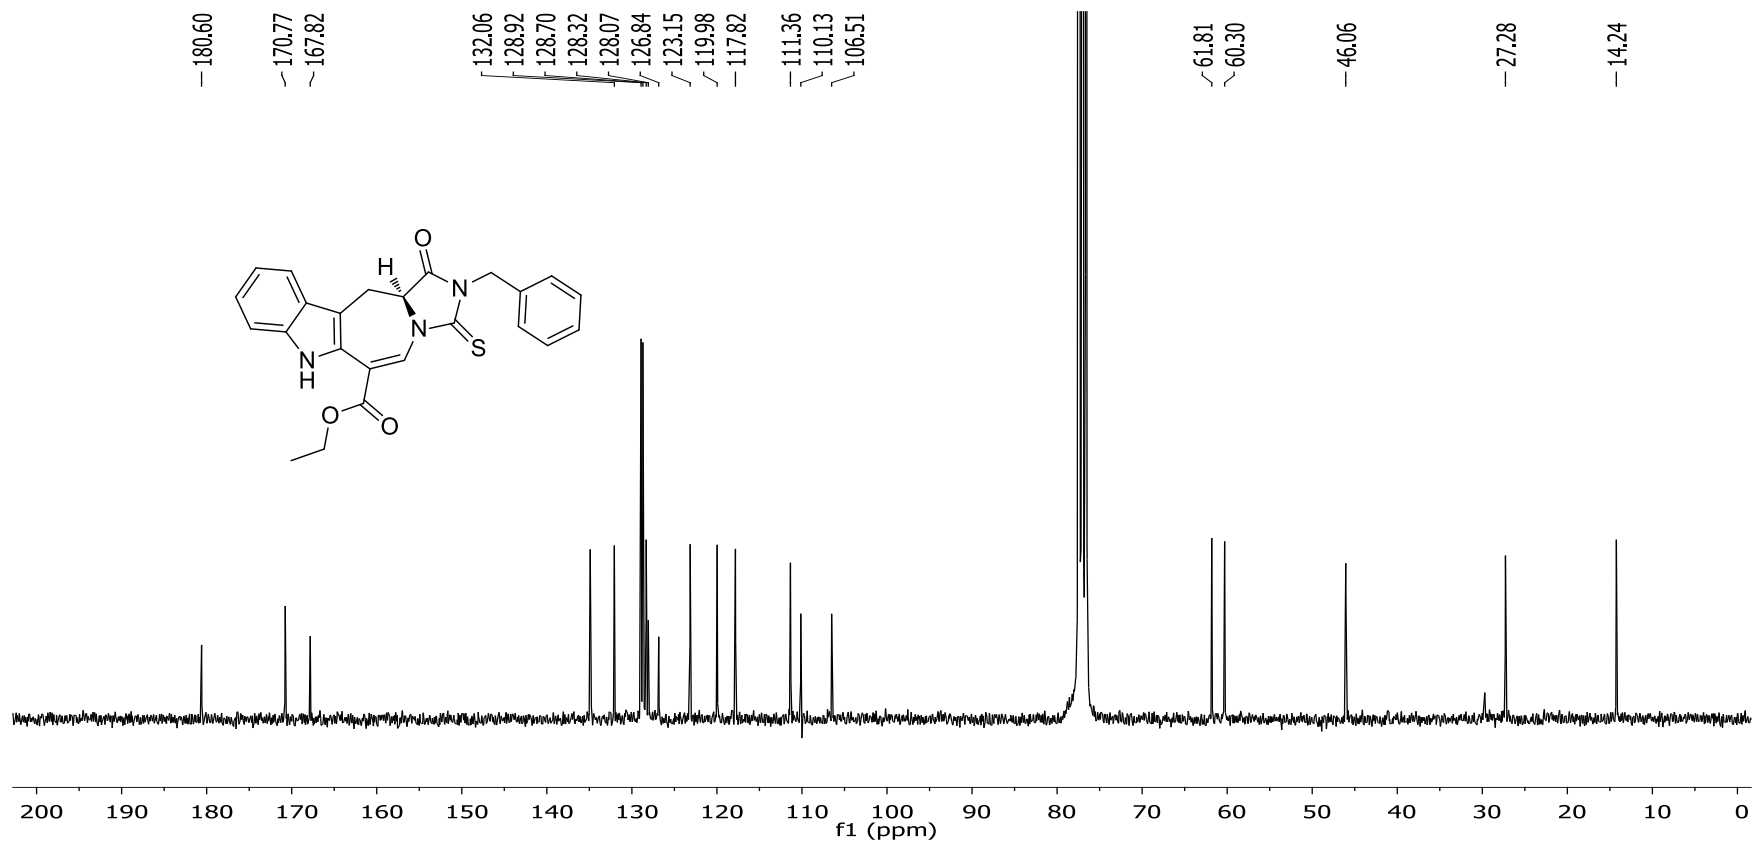

<sup>13</sup>C NMR spectrum (75 MHz) of compound **7h** in CDCl<sub>3</sub>



201406162001\_ib-N7-047 #389 RT: 1.35 AV: 1 NL: 6.79E7  
T: {0,0} + c EI Full ms [50.00-900.00]

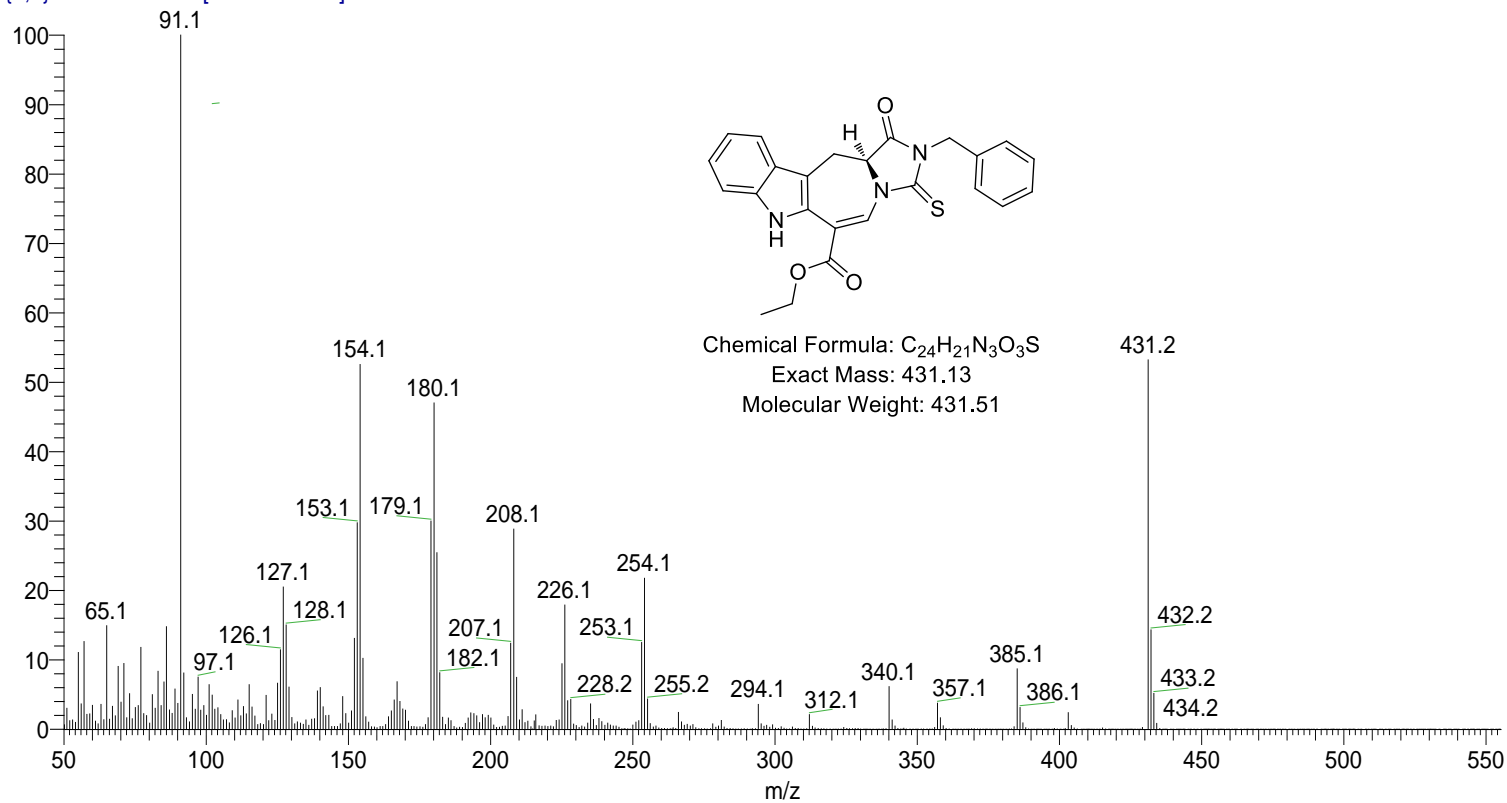

EI-LRMS of compound **7h**

D:\Xcalibur\...LIN-14-09\11\9eihr-76-c3

11.09.2014 15:38:51

9eihr-76-c3 #8 RT: 0,33 AV: 1 NL: 8,45E6  
T: + c EI Full ms [ 289,50-450,50]

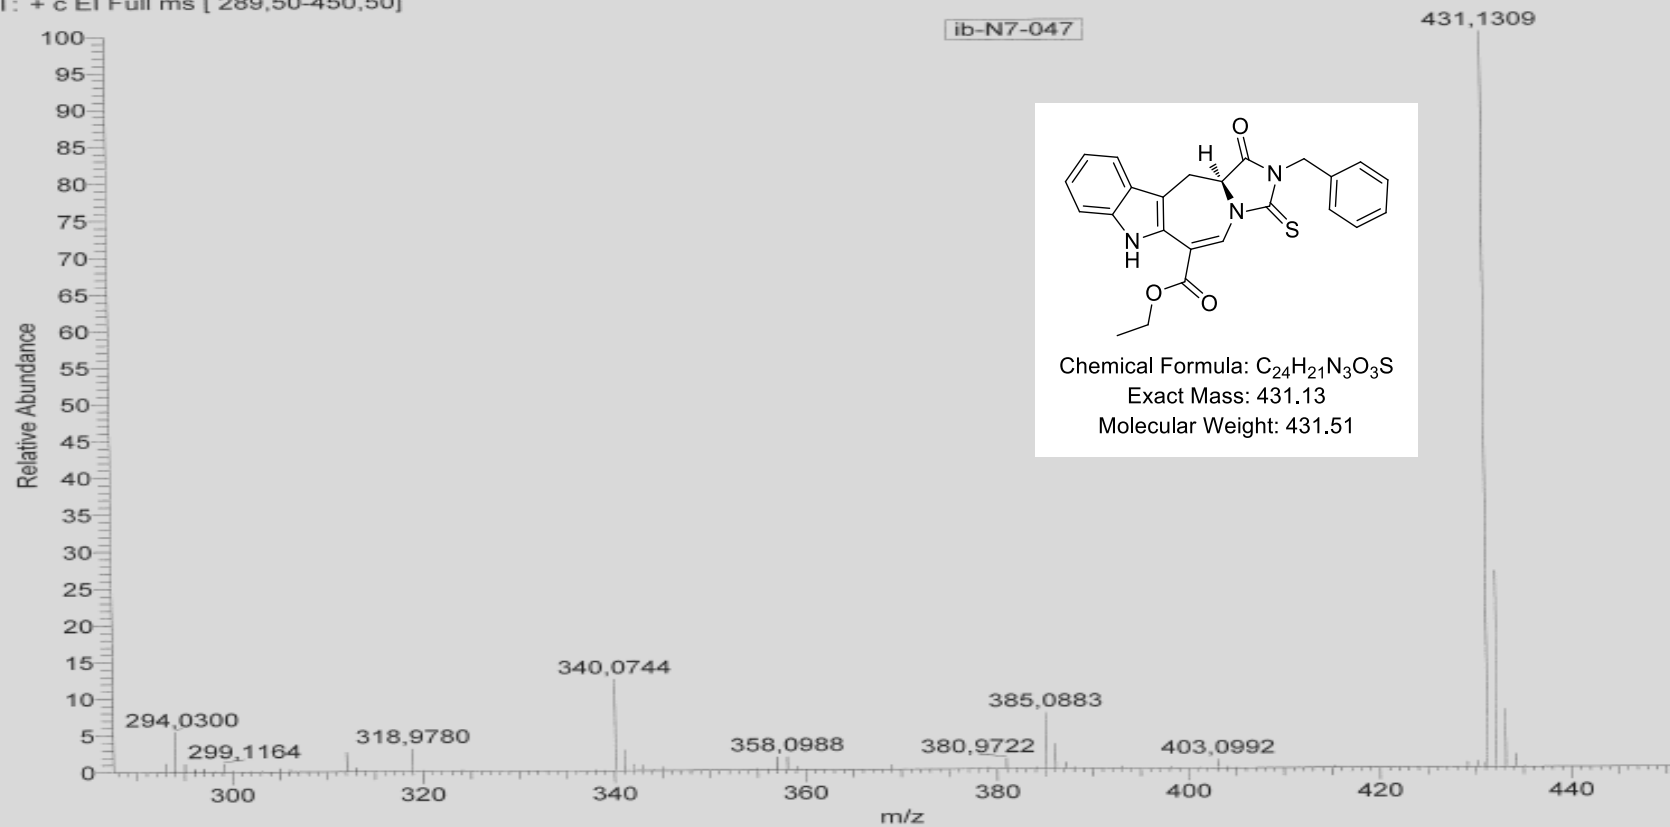

EI-HRMS of compound **7h**

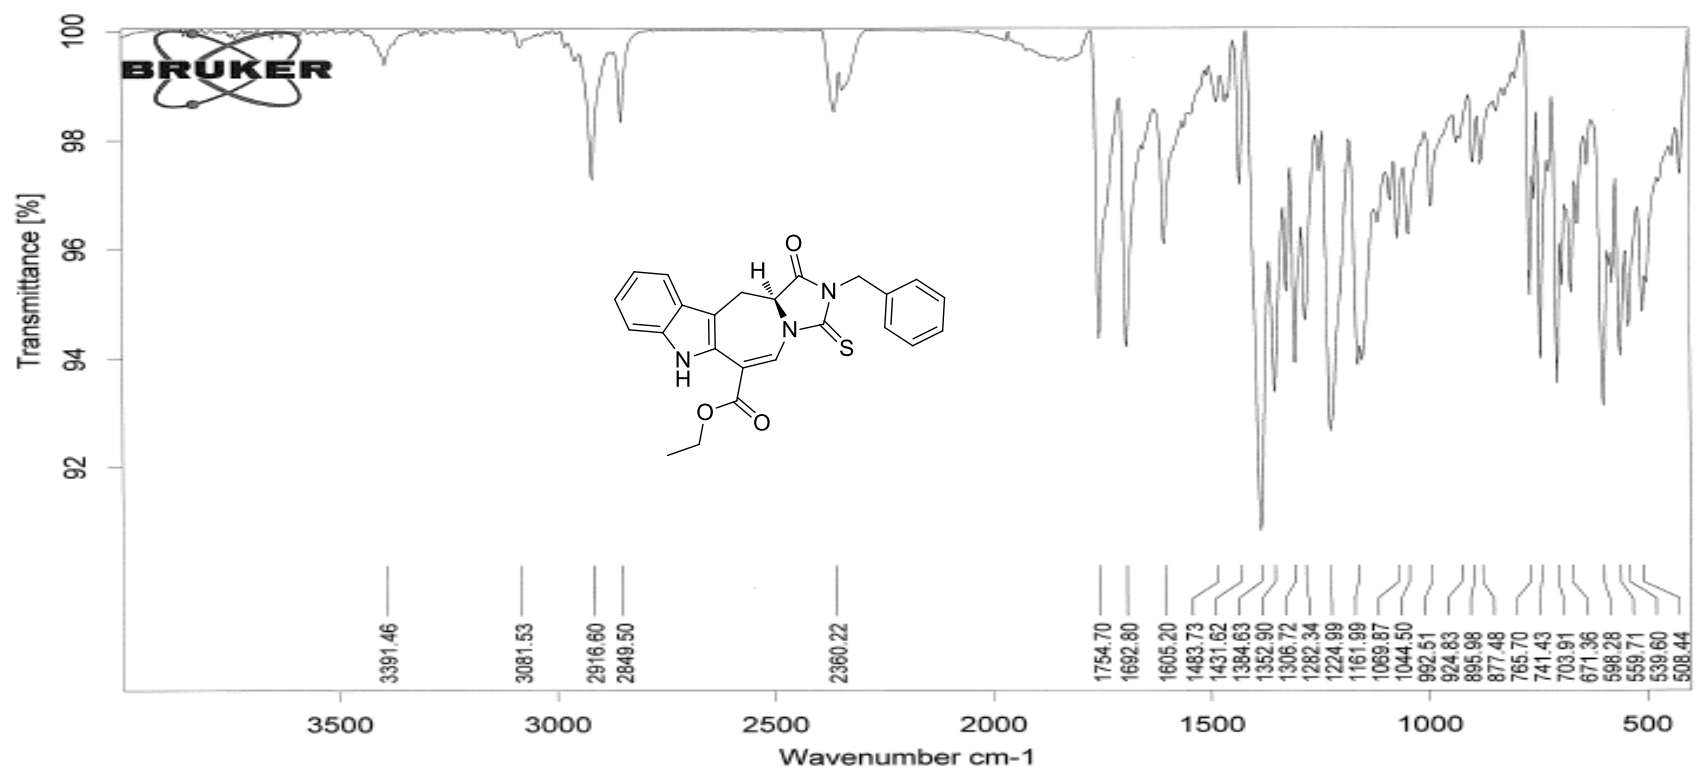

D:\temp-files\FTIR files\20140904\MIR\_TR\_DTGS\_blank KBr\_ib-N7-047.1

MIR\_TR\_DTGS\_blank KBr\_ib-N7-047

Instrument type and / or

2014/9/4

IR spectrum of compound **7h**

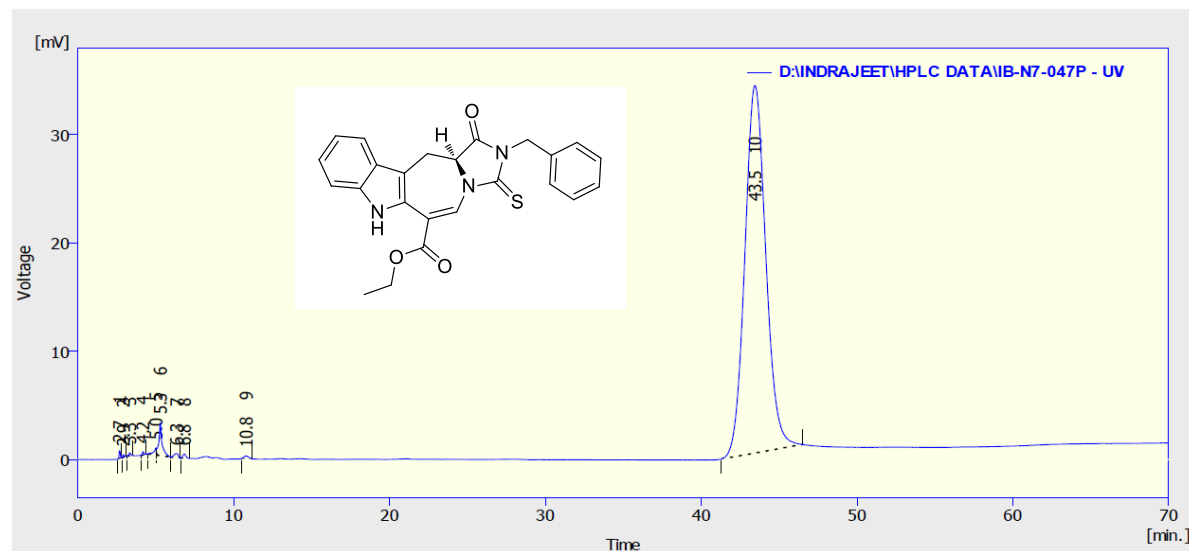

Result Table (Uncal - D:\INDRAJEET\HPLC DATA\IB-N7-047P - UV)

|    | Reten. Time [min] | Area [mV.s] | Height [mV] | Area [%] | Height [%] |
|----|-------------------|-------------|-------------|----------|------------|
| 1  | 2.676             | 4.017       | 0.727       | 0.1      | 1.8        |
| 2  | 2.916             | 1.148       | 0.226       | 0.0      | 0.6        |
| 3  | 3.328             | 1.929       | 0.281       | 0.1      | 0.7        |
| 4  | 4.180             | 2.012       | 0.315       | 0.1      | 0.8        |
| 5  | 5.012             | 8.144       | 0.652       | 0.3      | 1.6        |
| 6  | 5.292             | 43.362      | 3.021       | 1.3      | 7.5        |
| 7  | 6.348             | 7.431       | 0.399       | 0.2      | 1.0        |
| 8  | 6.824             | 5.681       | 0.398       | 0.2      | 1.0        |
| 9  | 10.792            | 5.000       | 0.259       | 0.2      | 0.6        |
| 10 | 43.456            | 3164.538    | 33.889      | 97.6     | 84.4       |
|    | Total             | 3243.262    | 40.169      | 100.0    | 100.0      |

### HPLC of compound 7h

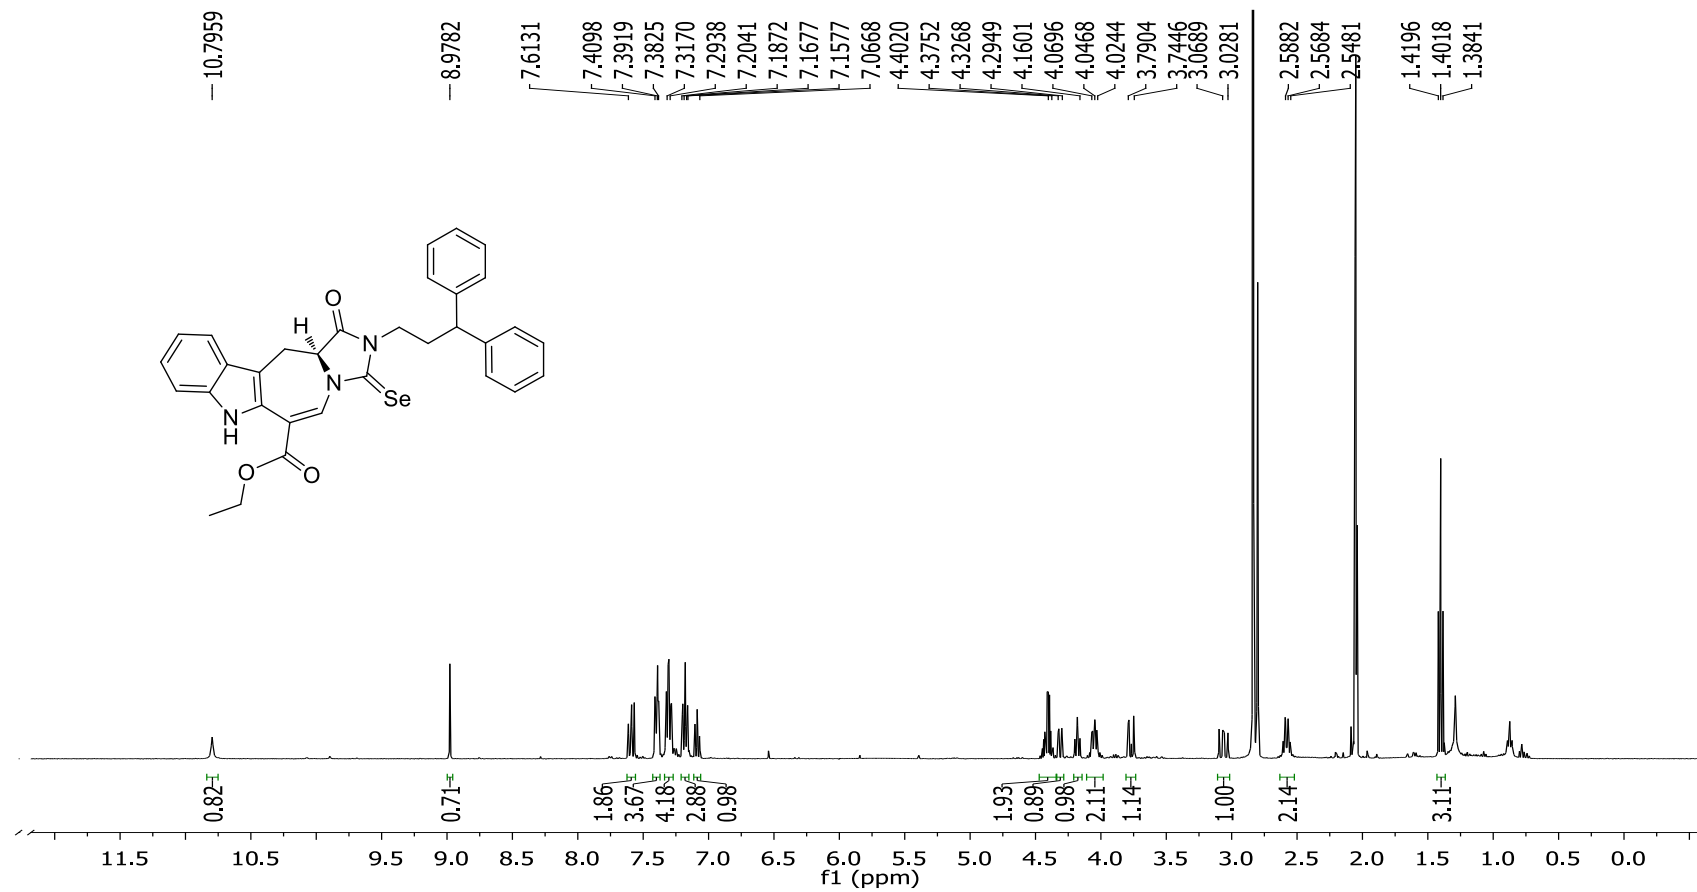

<sup>1</sup>H NMR spectrum (400 MHz) of compound **7i** in acetone-d<sub>6</sub>

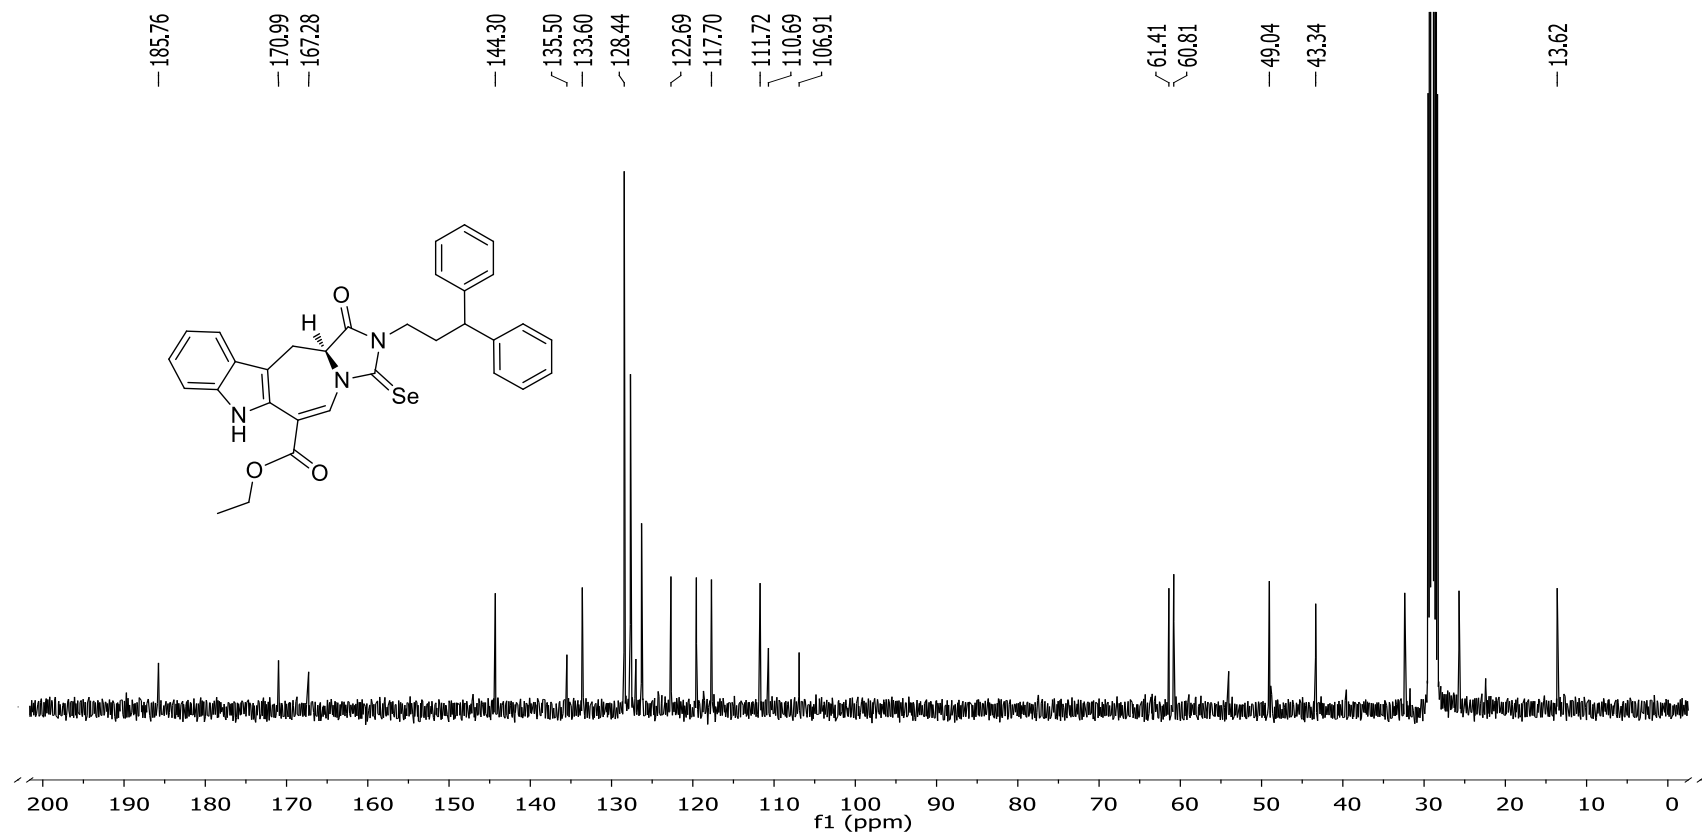

<sup>13</sup>C NMR spectrum (101 MHz) of compound **7i** in acetone-d<sub>6</sub>

201406162703\_LN2-D18 #389 RT: 1.35 AV: 1 NL: 8.77E6  
T: {0,0} + c EI Full ms [50.00-900.00]

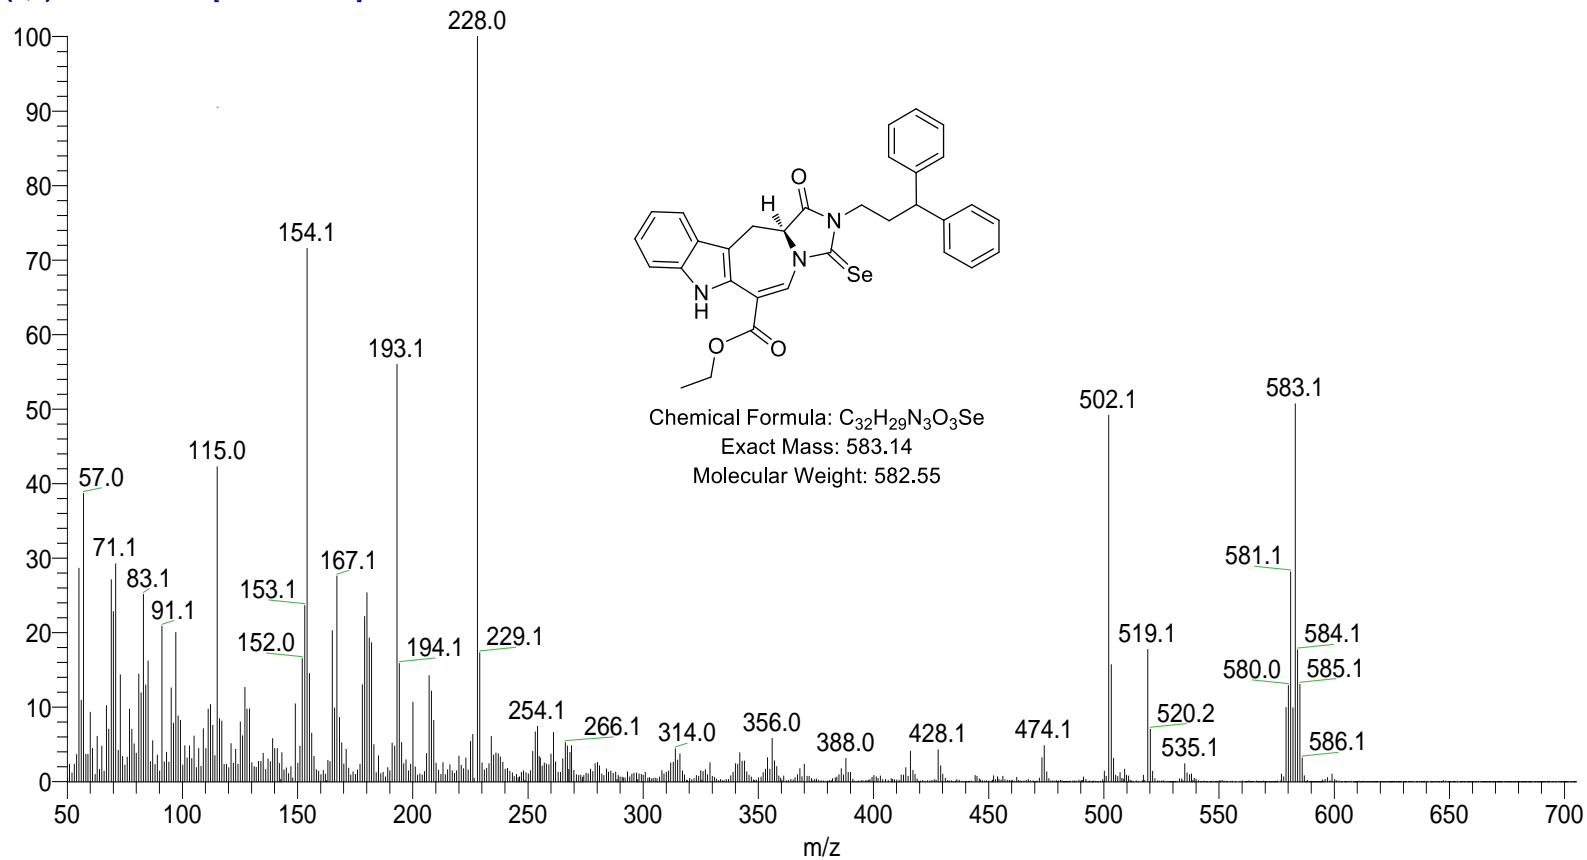

EI-LRMS of compound **7i**

9eihr-70-c1 #7 RT: 0,44 AV: 1 NL: 3,66E6  
T: + c EI Full ms [ 399,50-610,50]

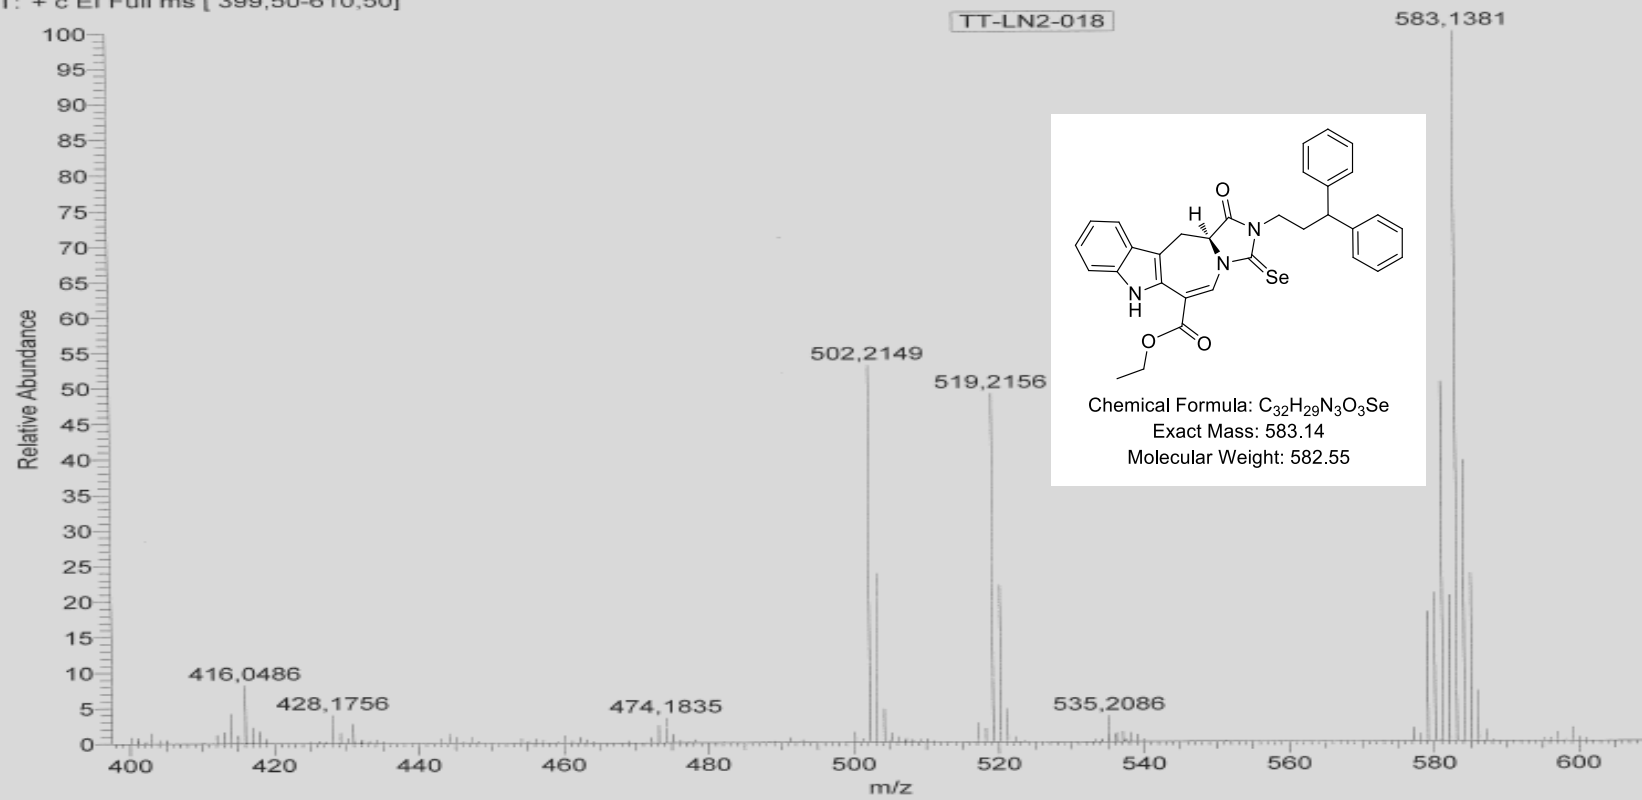

EI-HRMS of compound **7i**



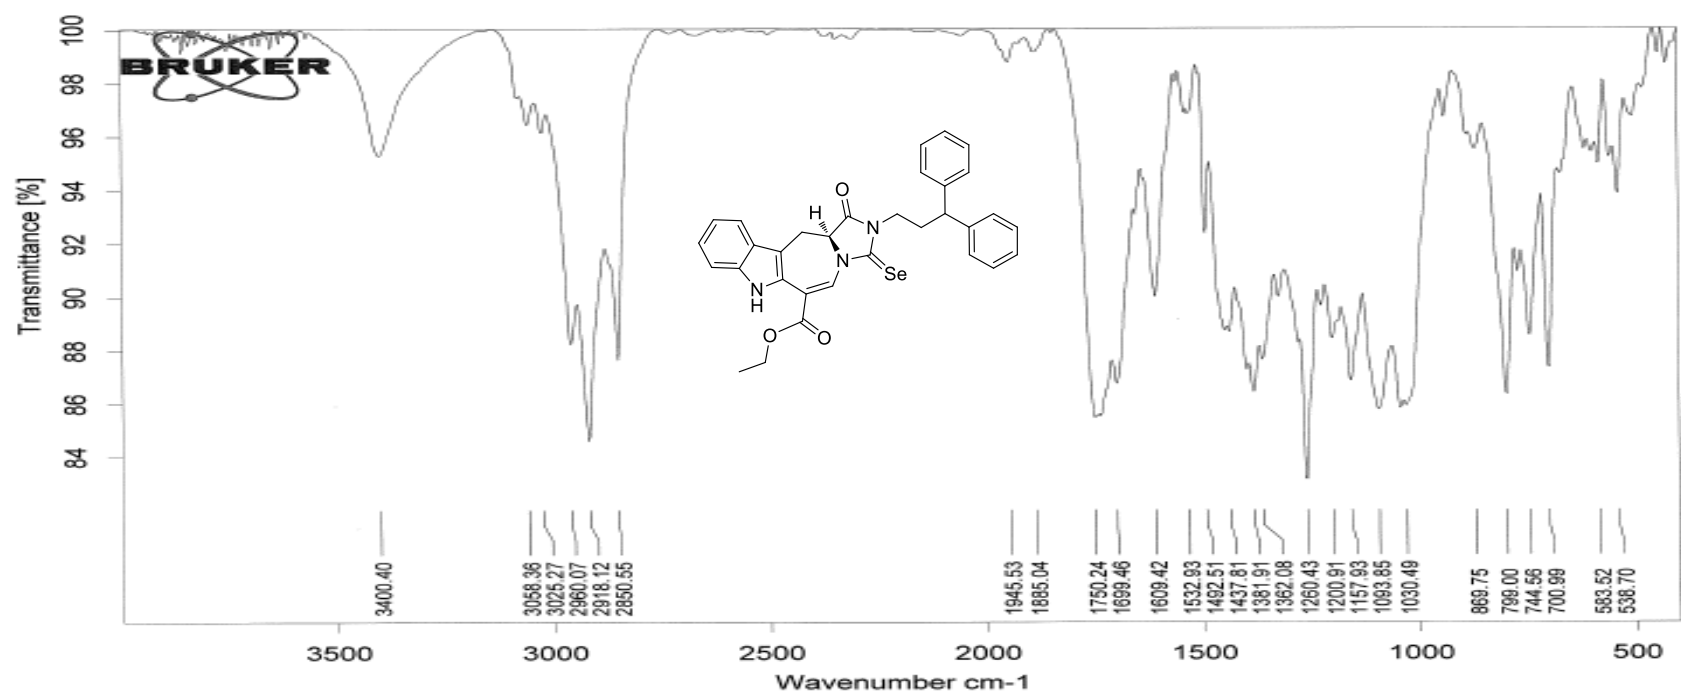

|                                                                      |                                  |                    |          |
|----------------------------------------------------------------------|----------------------------------|--------------------|----------|
| D:\temp-files\FTIR files\20140904\MIR_TR_DTGS_blank KBr_TT-LN2-018.0 | MIR_TR_DTGS_blank KBr_TT-LN2-018 | Instrument type an | 2014/9/4 |
|----------------------------------------------------------------------|----------------------------------|--------------------|----------|

IR spectrum of compound 7i

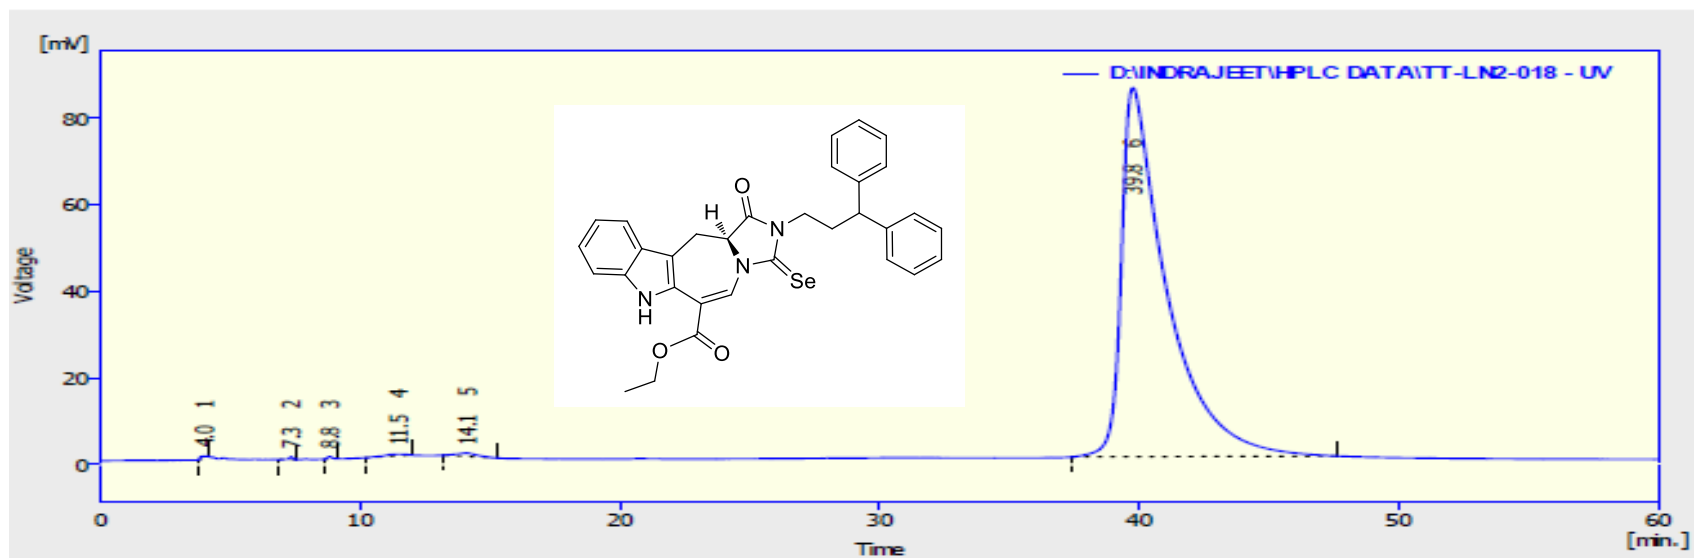

Result Table (Uncal - D:\INDRAJEET\HPLC DATA\TT-LN2-018 - UV)

|   | Reten. Time [min] | Area [mV.s] | Height [mV] | Area [%] | Height [%] |
|---|-------------------|-------------|-------------|----------|------------|
| 1 | 3.960             | 6.502       | 0.398       | 0.1      | 0.5        |
| 2 | 7.336             | 6.736       | 0.637       | 0.1      | 0.7        |
| 3 | 8.820             | 6.735       | 0.567       | 0.1      | 0.6        |
| 4 | 11.484            | 19.447      | 0.346       | 0.2      | 0.4        |
| 5 | 14.104            | 40.795      | 0.773       | 0.4      | 0.9        |
| 6 | 39.764            | 10348.477   | 85.279      | 99.2     | 96.9       |
|   | Total             | 10428.692   | 88.001      | 100.0    | 100.0      |

HPLC of compound 7i

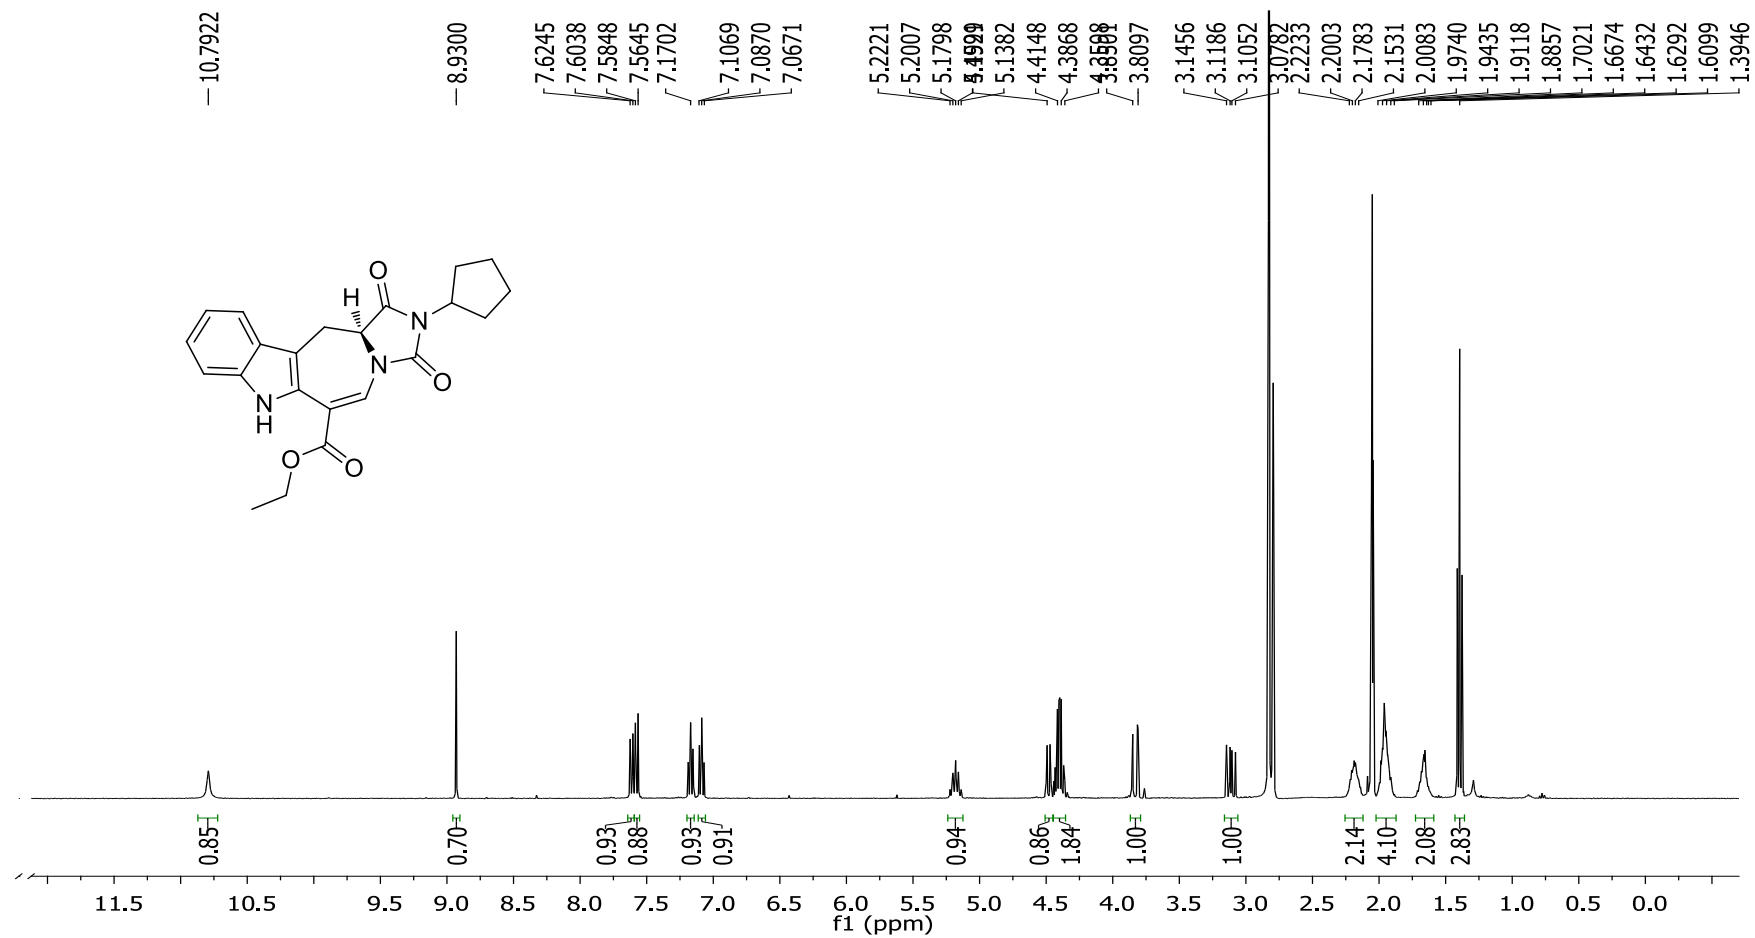

<sup>1</sup>H NMR spectrum (400 MHz) of compound **7j** in acetone-d<sub>6</sub>

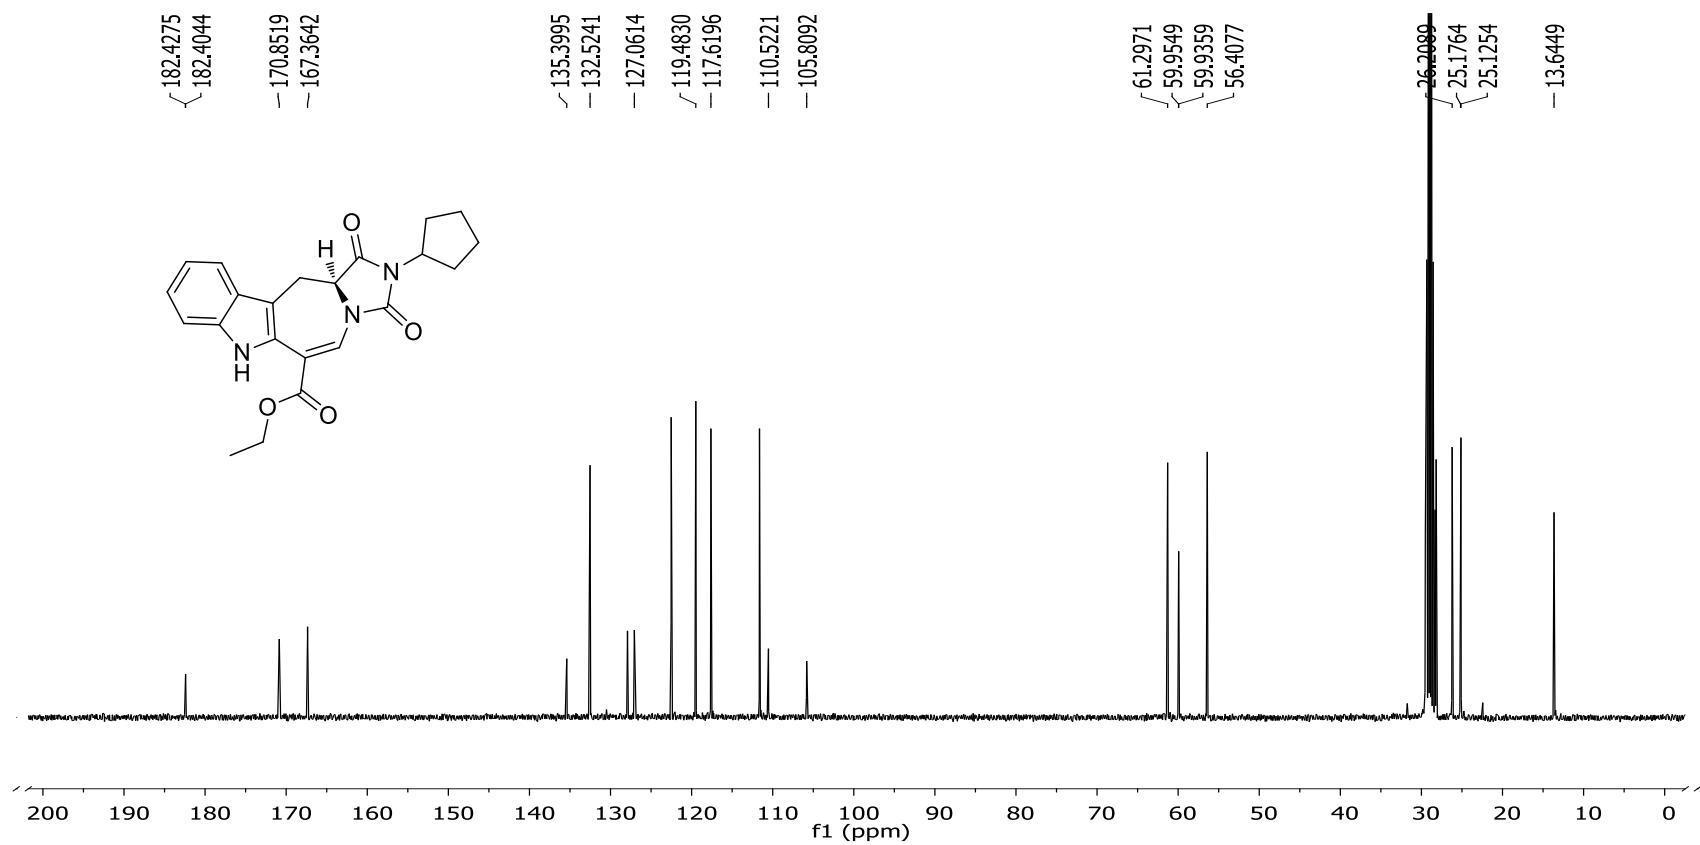

<sup>13</sup>C NMR spectrum (101 MHz) of compound **7j** in acetone-d<sub>6</sub>

2014070908\_TT-LN2-020 #312 RT: 1.09 AV: 1 NL: 3.97E7  
T: {0,0} + c EI Full ms [50.00-900.00]

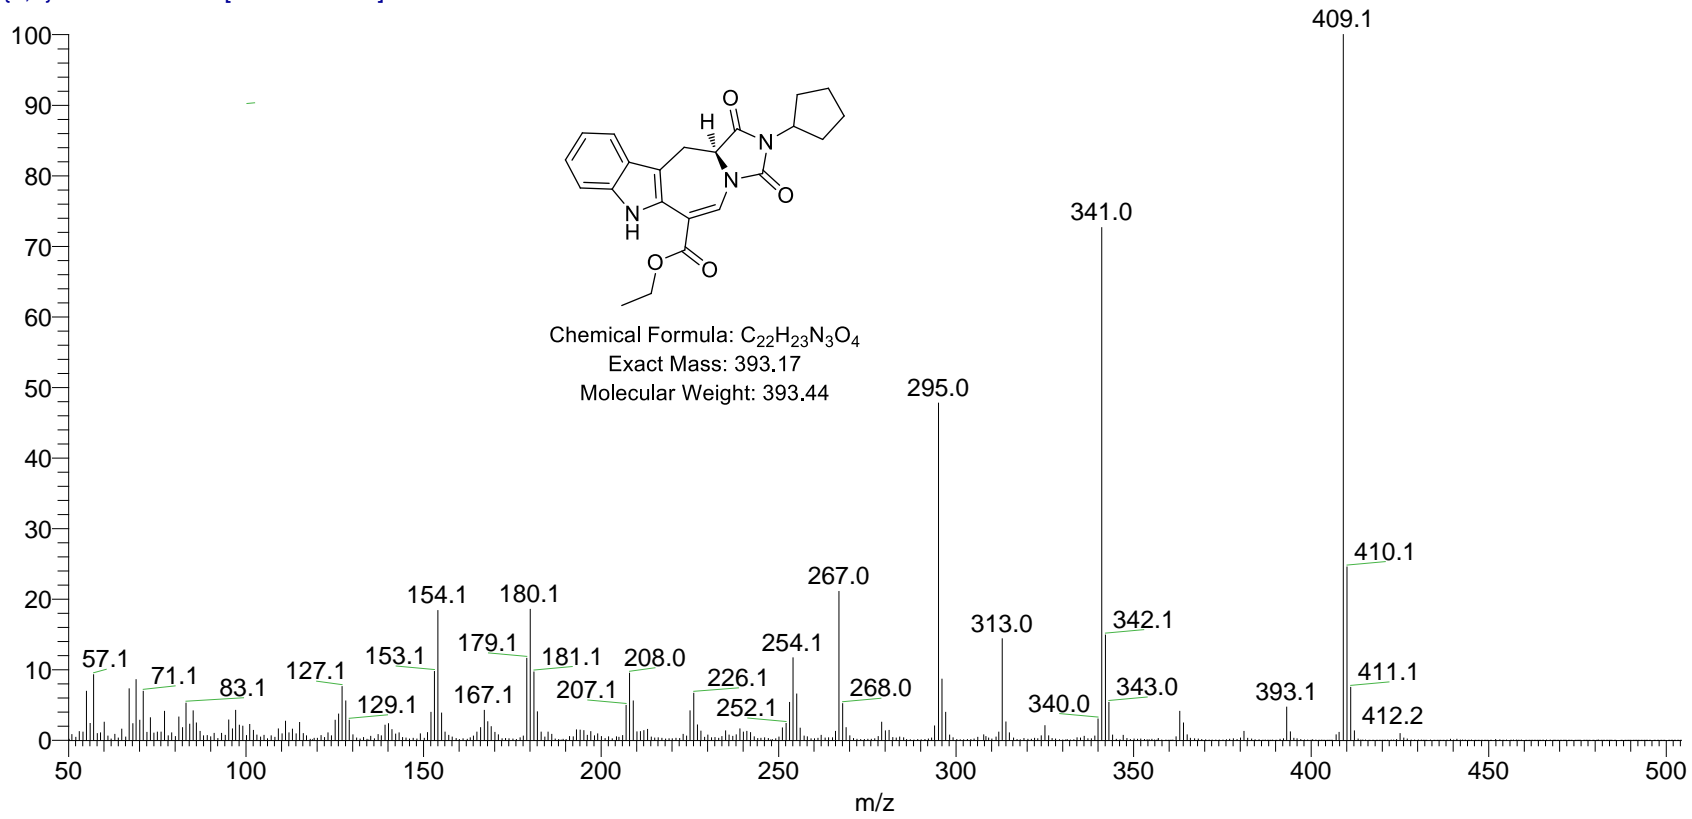

EI-LRMS of compound 7j

D:\Xcalibur\...10\9eihr-86a-c1

10.09.2014 17:28:11

9eihr-86a-c1 #2 RT: 0,20 AV: 1 NL: 5,81E6  
T: + c EI Full ms [ 284,50-435,50]

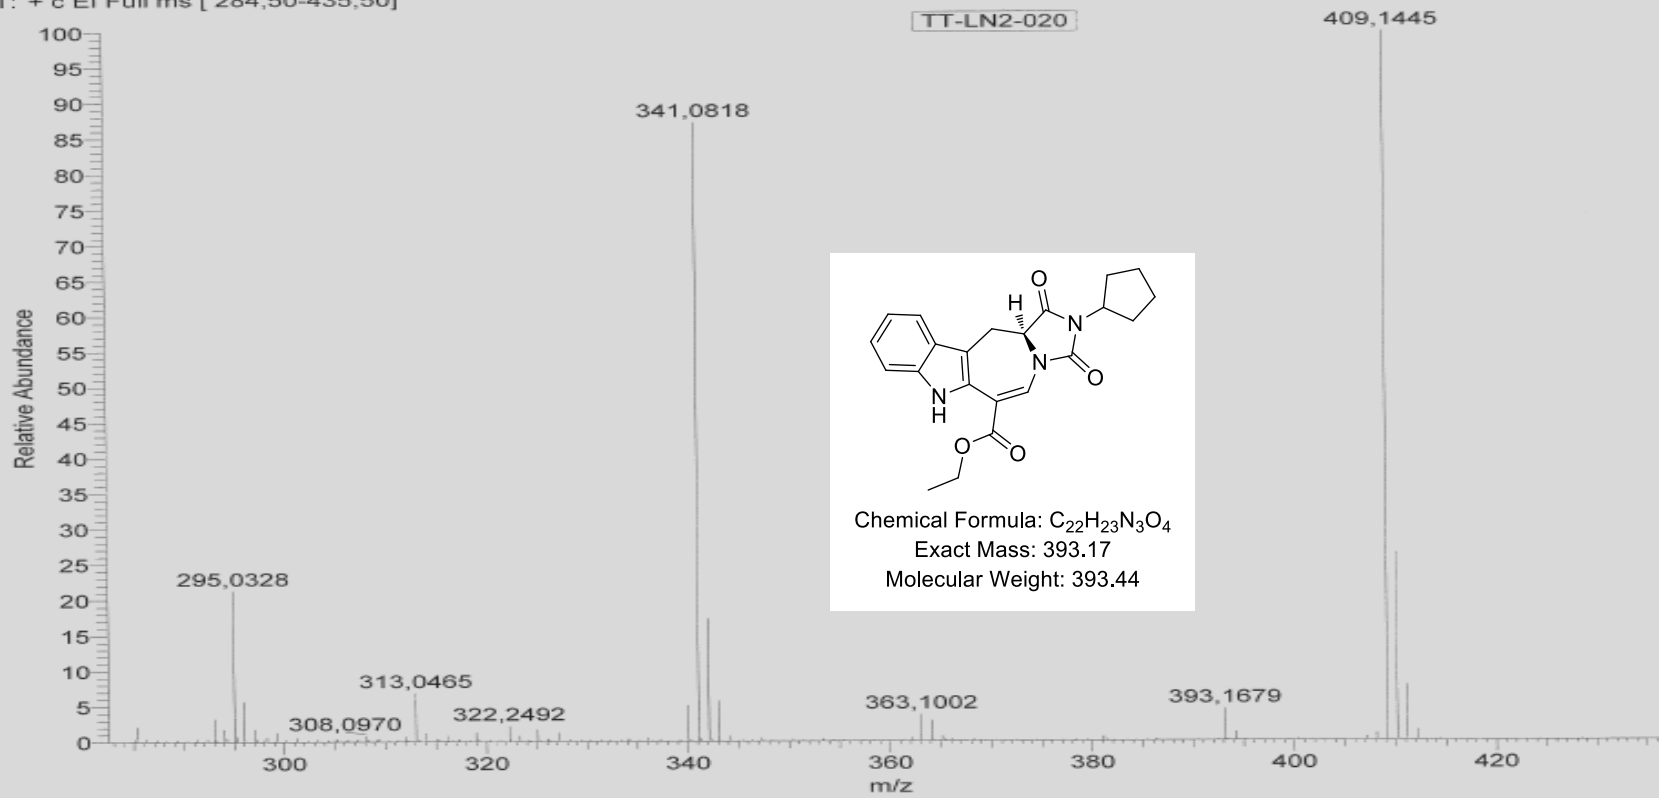

EI-HRMS of compound **7j**

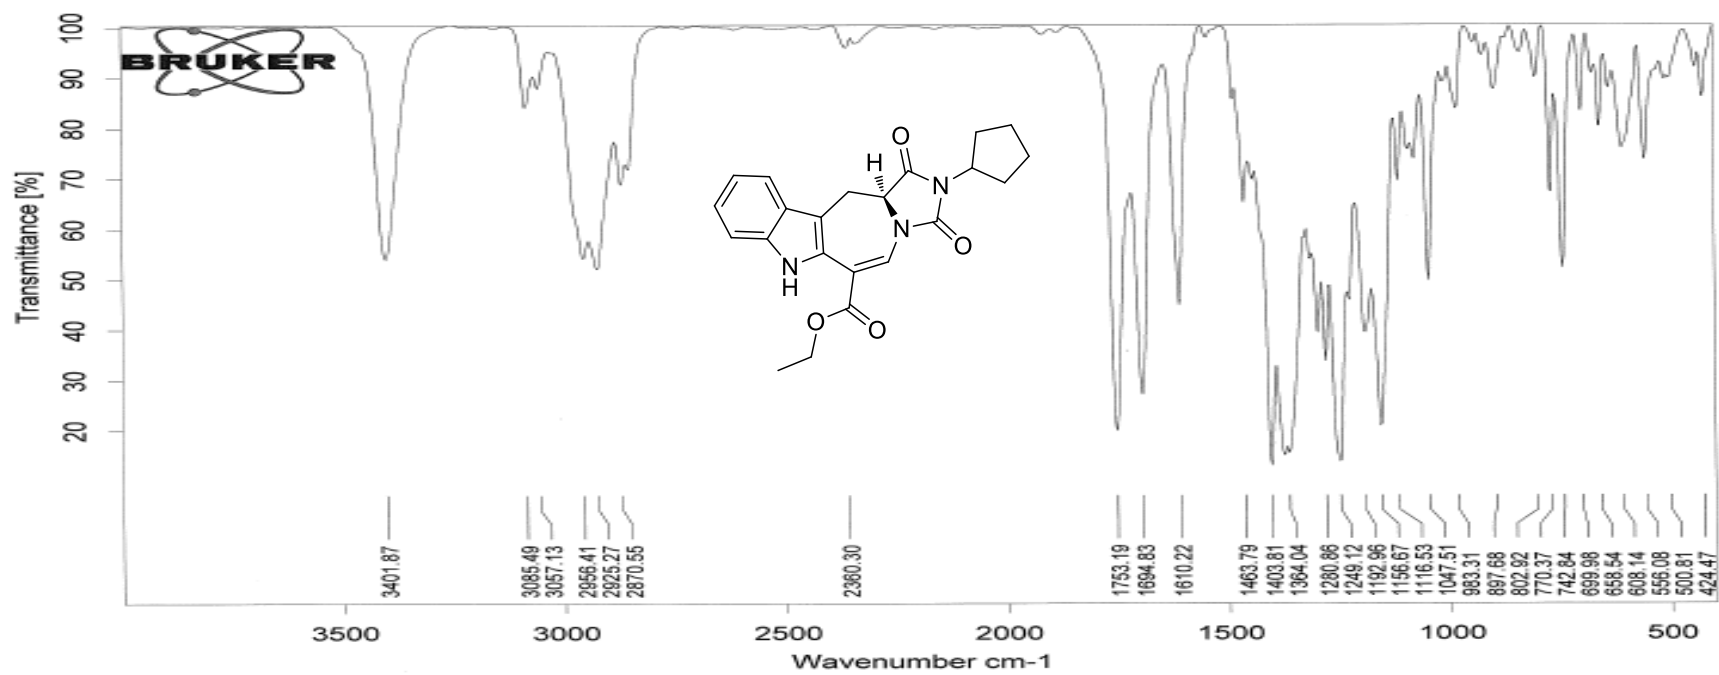

D:\temp-files\FTIR files\20140904\MIR\_TR\_DTGS\_blank KBr\_TT-LN2-20.0

MIR\_TR\_DTGS\_blank KBr\_TT-LN2-20

Instrument type and /

2014/9/4

IR spectrum of compound **7j**

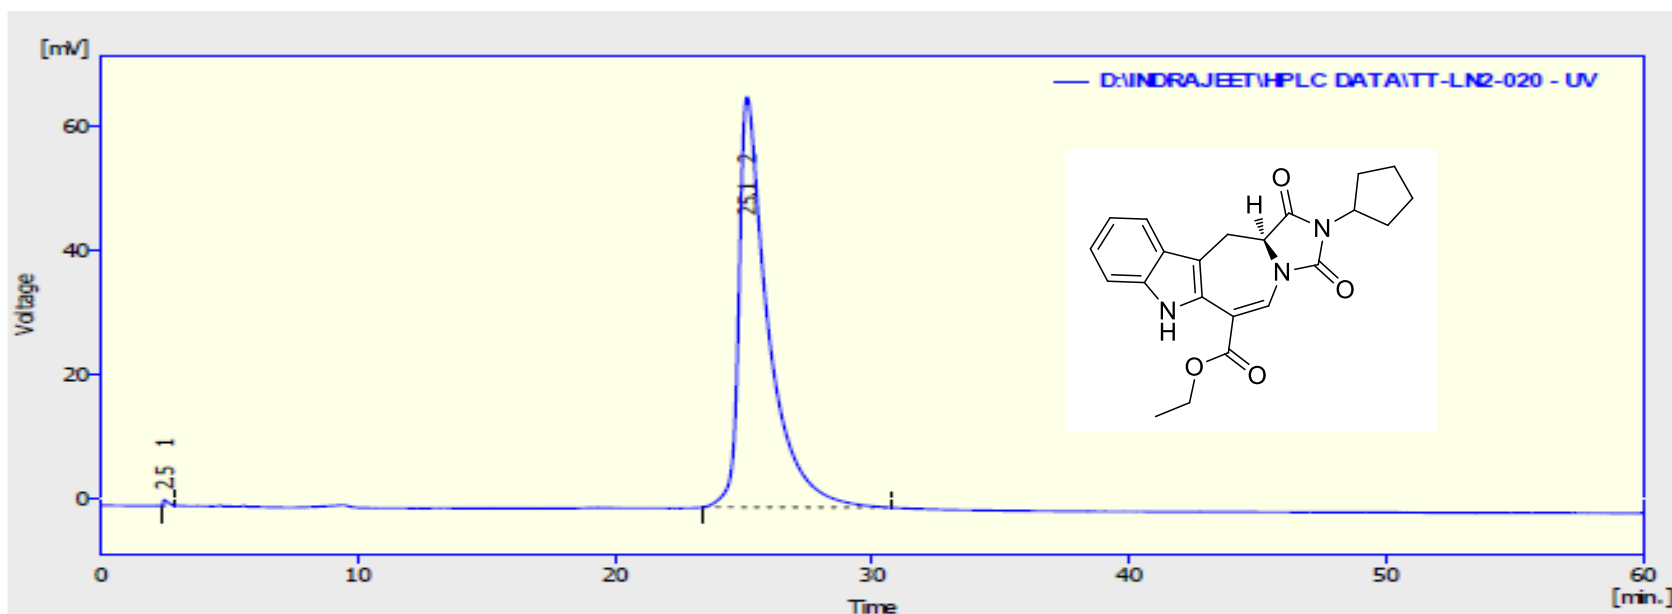

Result Table (Uncal - D:\INDRAJEET\HPLC DATA\TT-LN2-020 - UV)

|   | Reten. Time [min] | Area [mV.s] | Height [mV] | Area [%] | Height [%] |
|---|-------------------|-------------|-------------|----------|------------|
| 1 | 2.468             | 13.204      | 0.969       | 0.3      | 1.4        |
| 2 | 25.144            | 5215.595    | 66.060      | 99.7     | 98.6       |
|   | Total             | 5228.879    | 67.029      | 100.0    | 100.0      |

HPLC of compound 7j



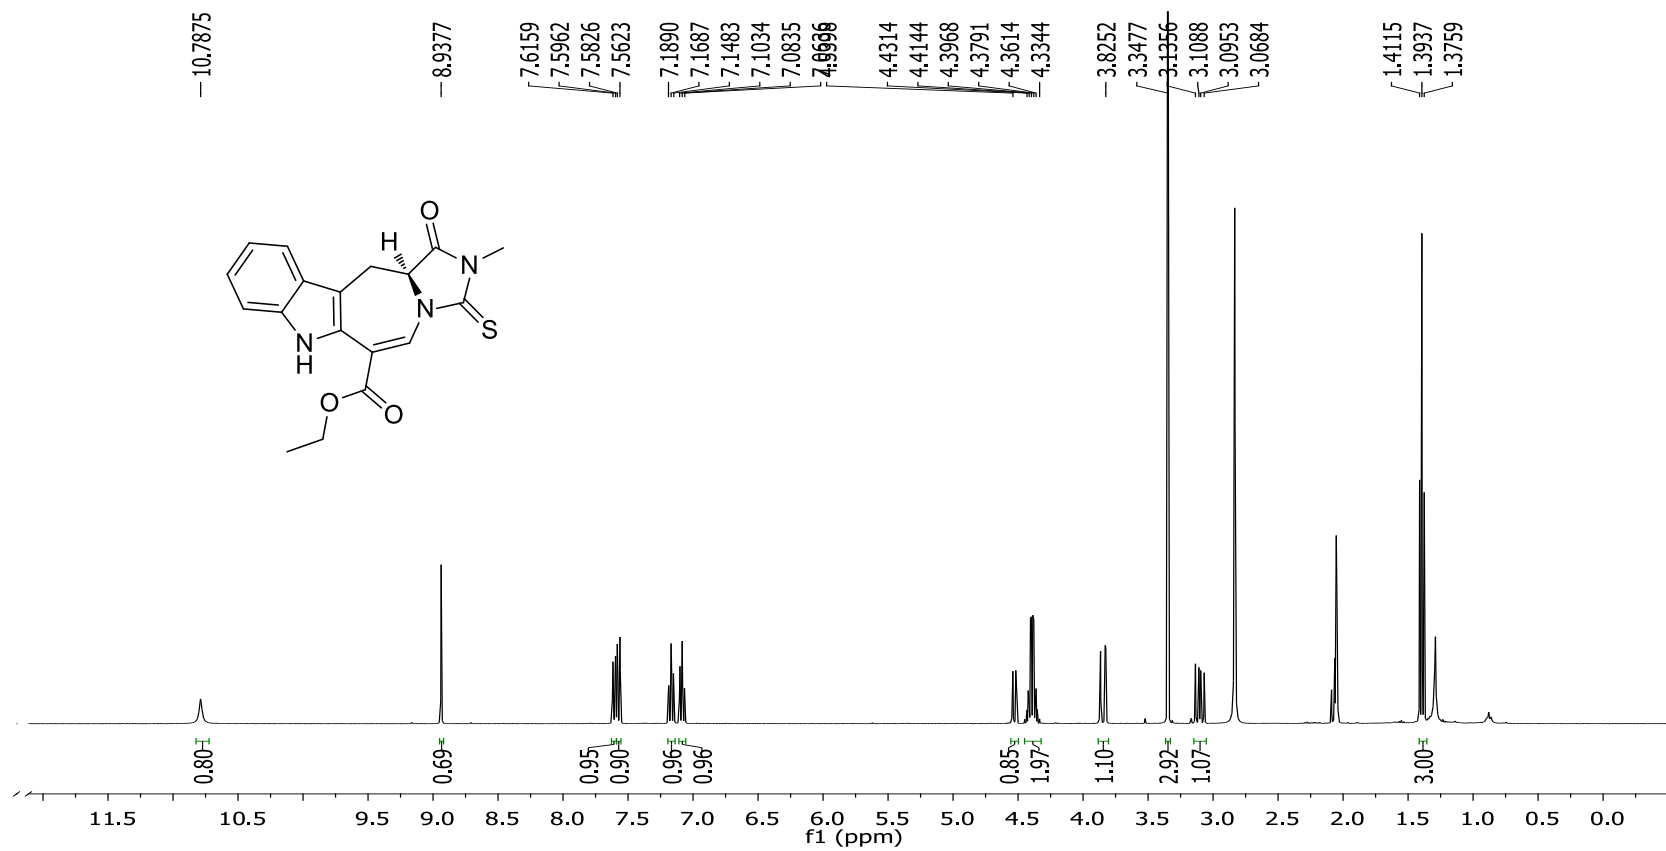

$^1\text{H}$  NMR spectrum (400 MHz) of compound **7k** in acetone- $\text{d}_6$

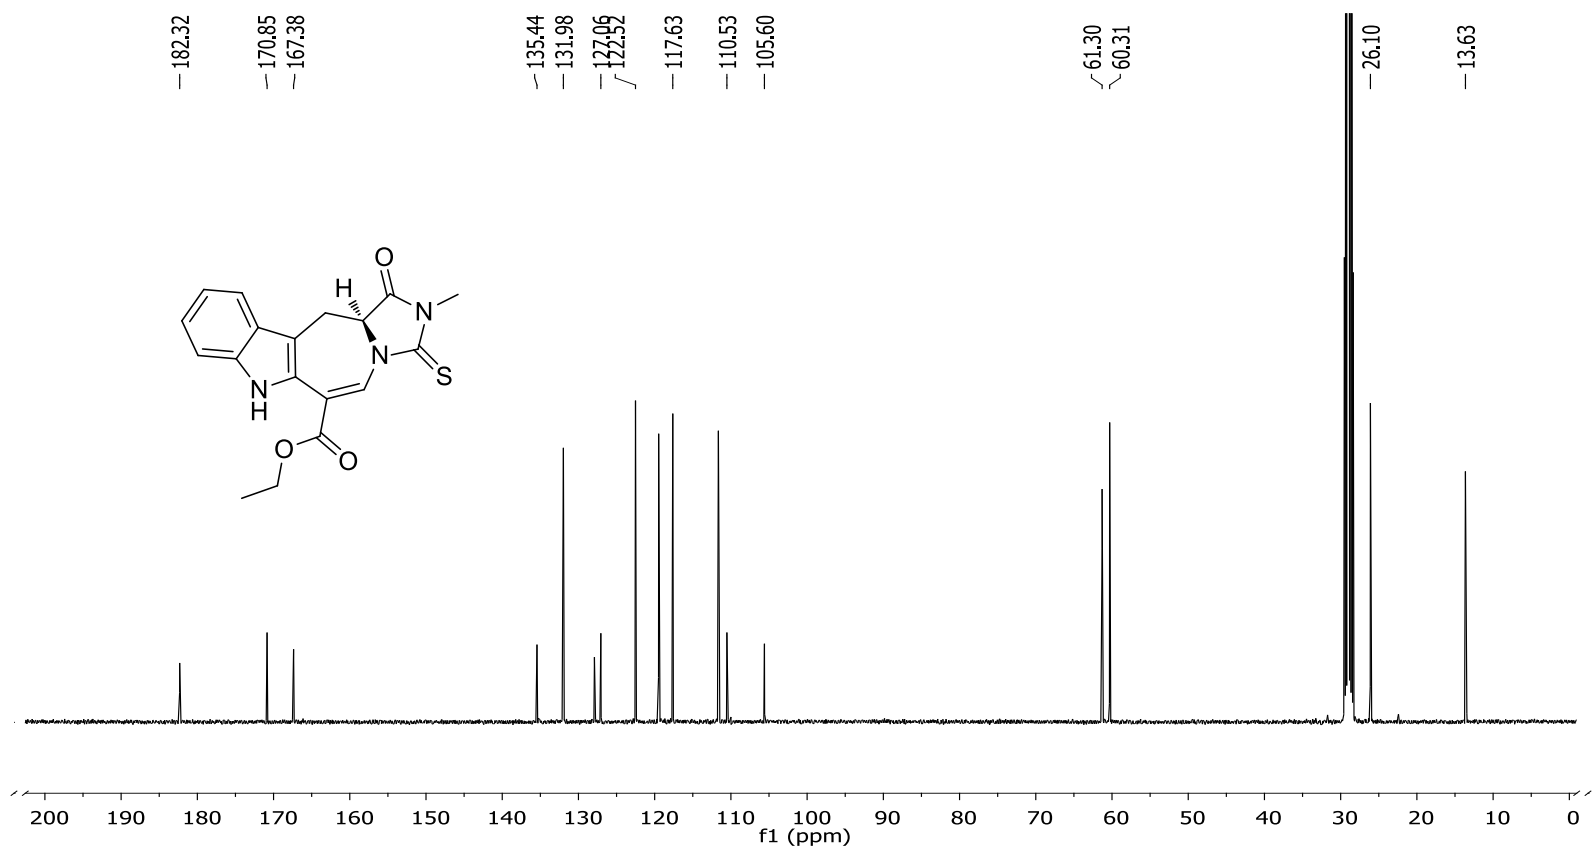

<sup>13</sup>C NMR spectrum (101 MHz) of compound **7k** in acetone-d<sub>6</sub>

201407172502\_ib-N7-065 #304 RT: 1.06 AV: 1 NL: 8.77E7  
T: {0,0} + c EI Full ms [50.00-900.00]

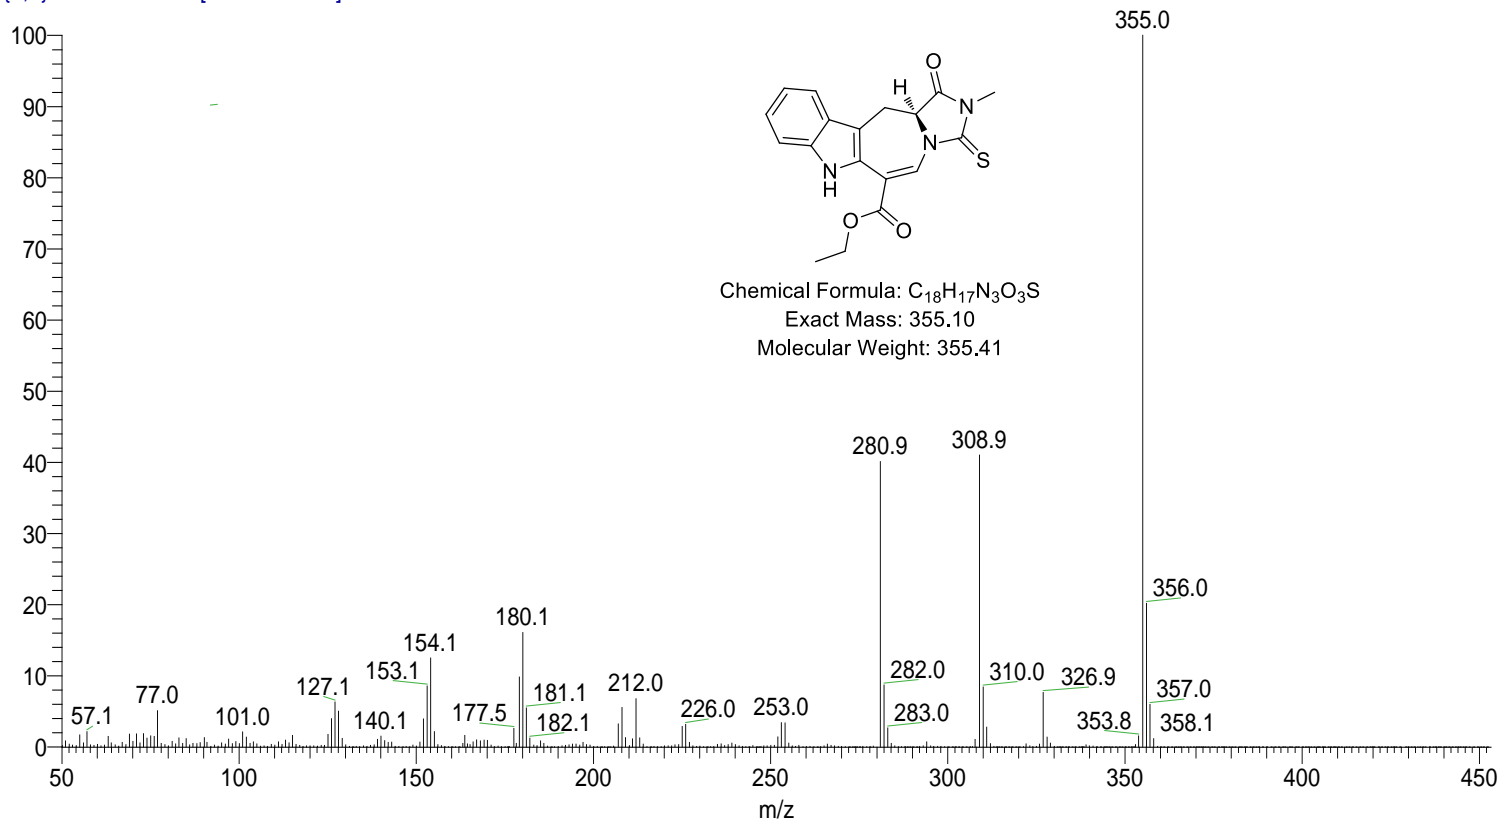

EI-LRMS of compound 7k

9eibr-90-c1 #9 RT: 0,34 AV: 1 NL: 1,40E7  
T: + c EI Full ms [ 249,50-385,50]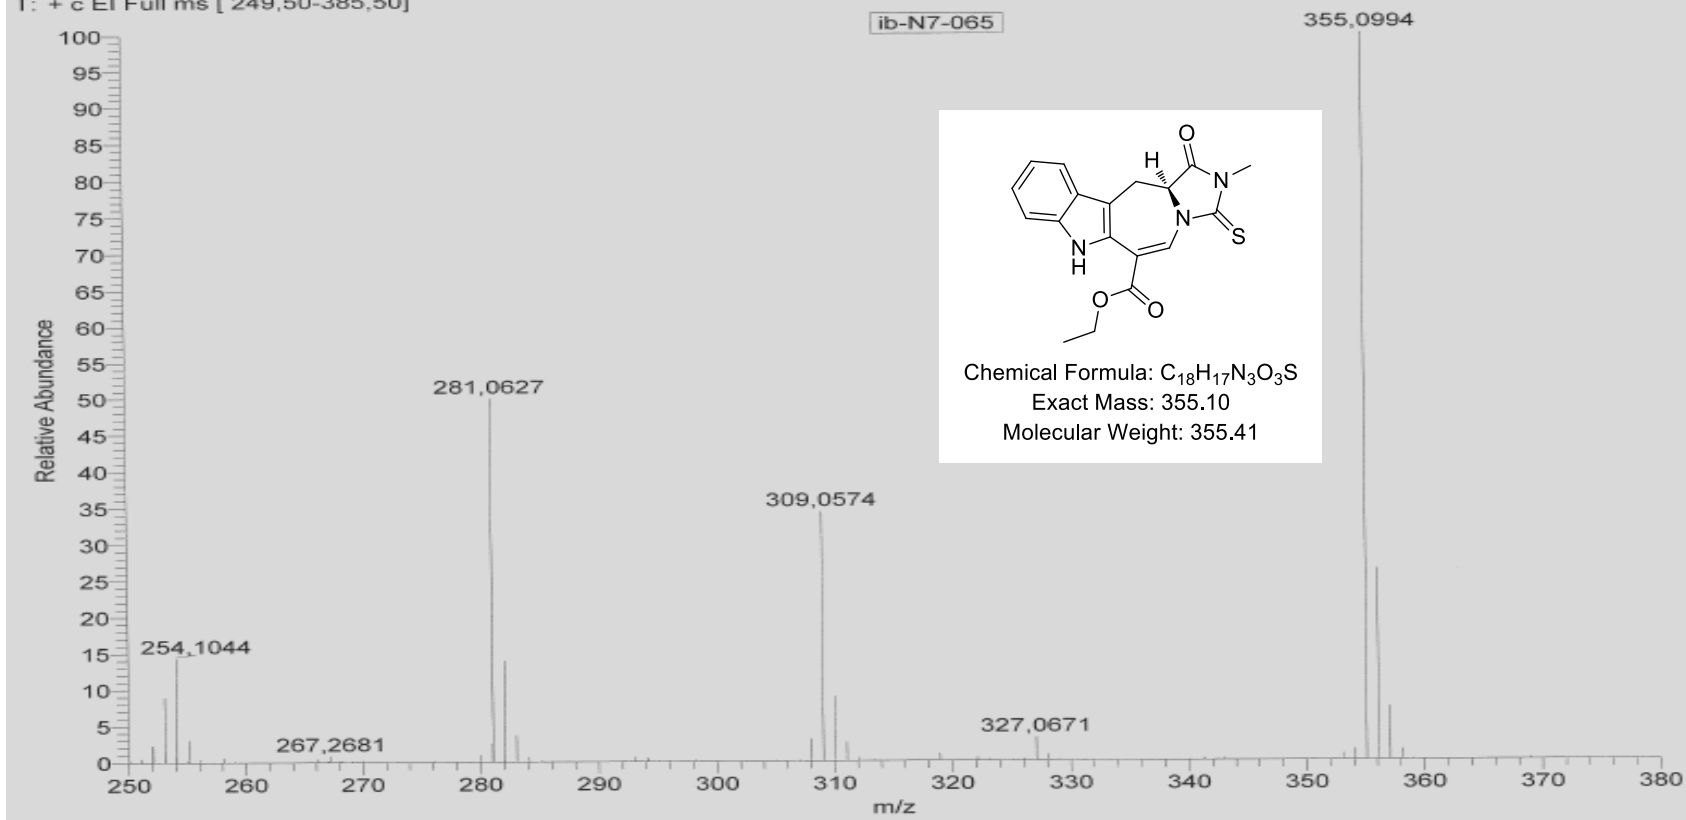EI-HRMS of compound **7k**

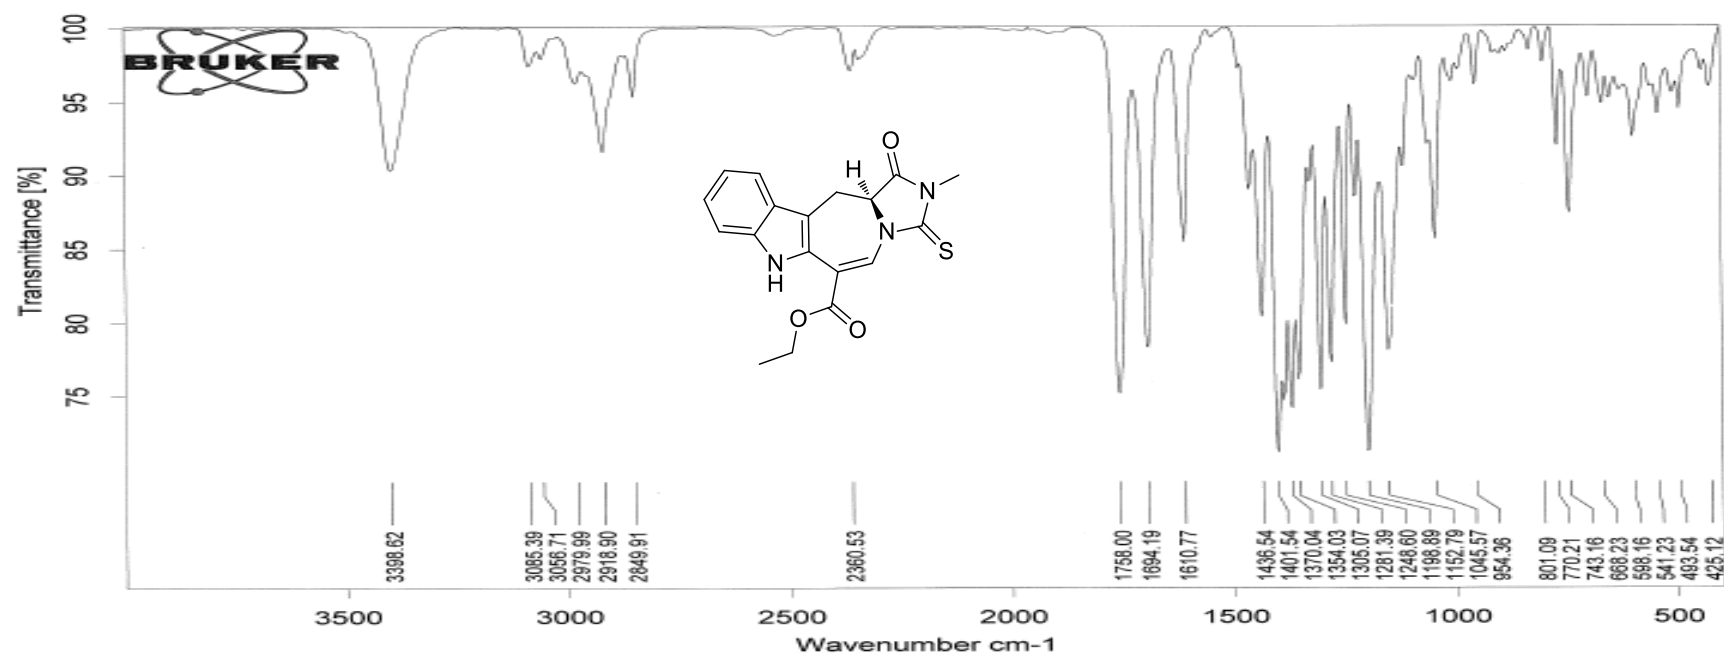

D:\temp-files\FTIR files\20140904\MIR\_TR\_DTGS\_blank KBr\_ib-N6-065.0

MIR\_TR\_DTGS\_blank KBr\_ib-N6-065

Instrument type and / o 2014/9/4

IR spectrum of compound **7k**

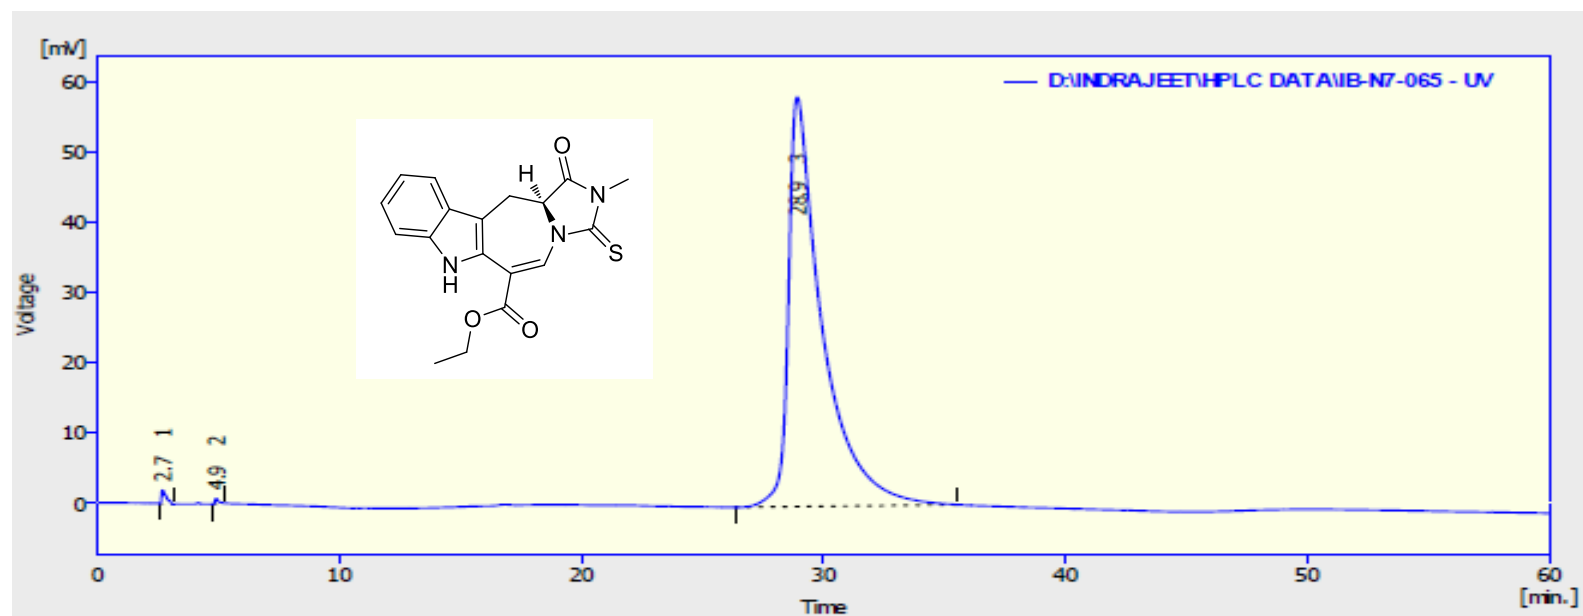

Result Table (Uncal - D:\INDRAJEET\HPLC DATA\IB-N7-065 - UV)

|   | Reten. Time [min] | Area [mV.s] | Height [mV] | Area [%] | Height [%] |
|---|-------------------|-------------|-------------|----------|------------|
| 1 | 2.692             | 25.128      | 1.873       | 0.4      | 3.1        |
| 2 | 4.904             | 7.371       | 0.759       | 0.1      | 1.2        |
| 3 | 28.924            | 5657.051    | 58.251      | 99.4     | 95.7       |
|   | Total             | 5689.551    | 60.883      | 100.0    | 100.0      |

HPLC of compound **7k**

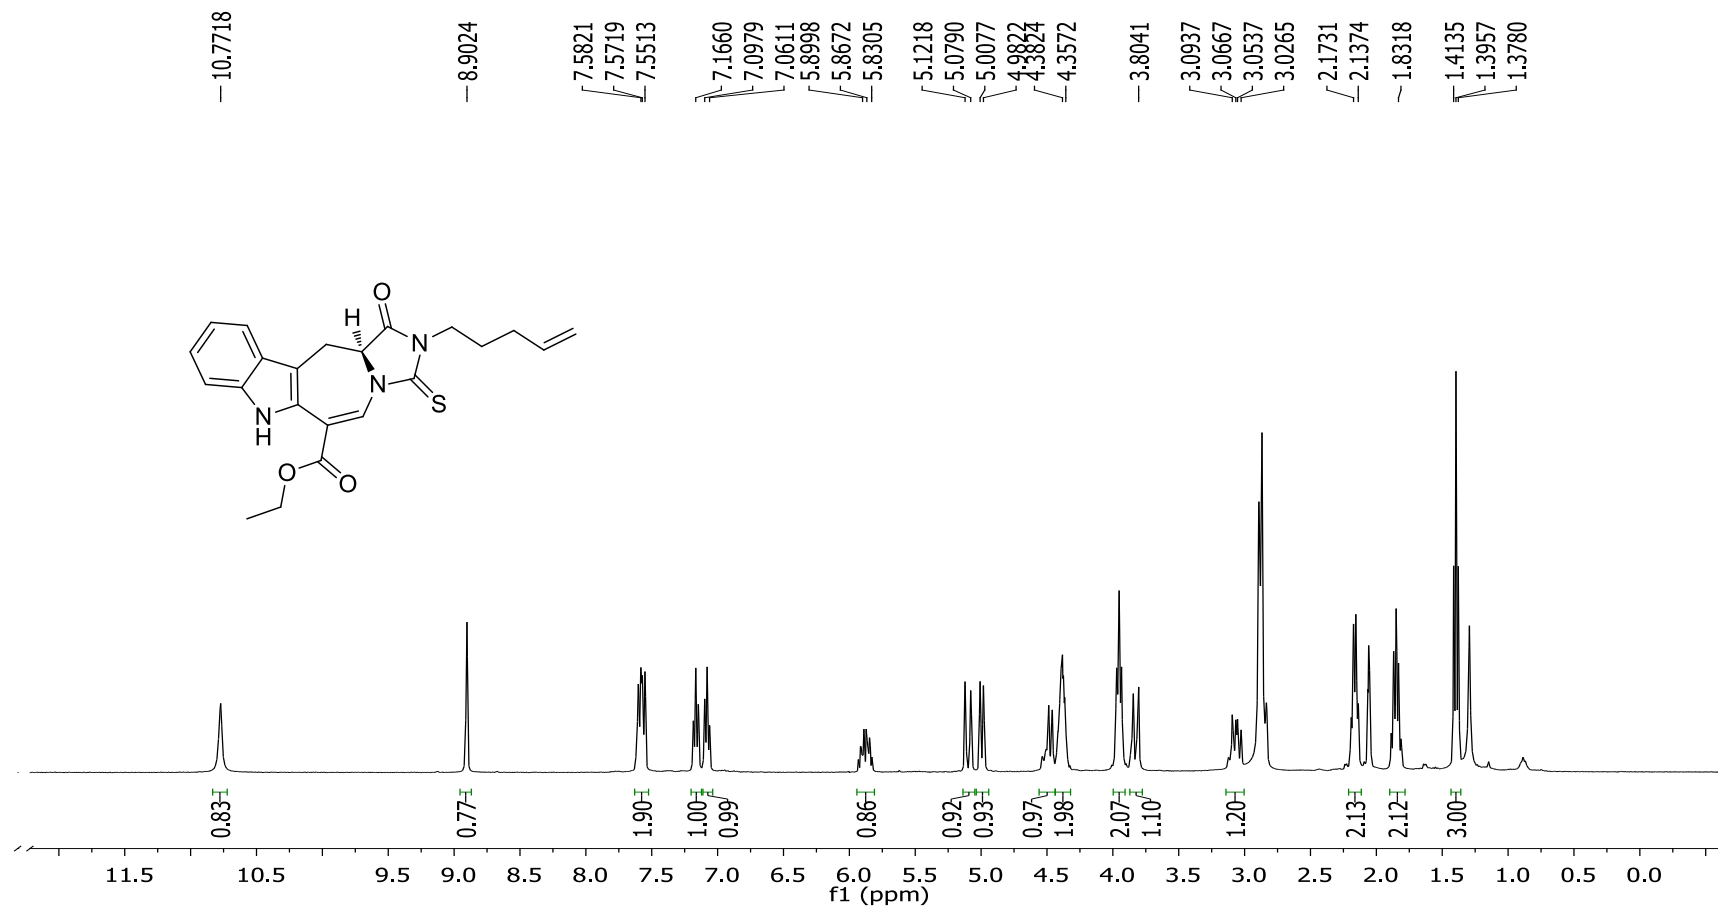

<sup>1</sup>H NMR spectrum (400 MHz) of compound **71** in acetone-d<sub>6</sub>

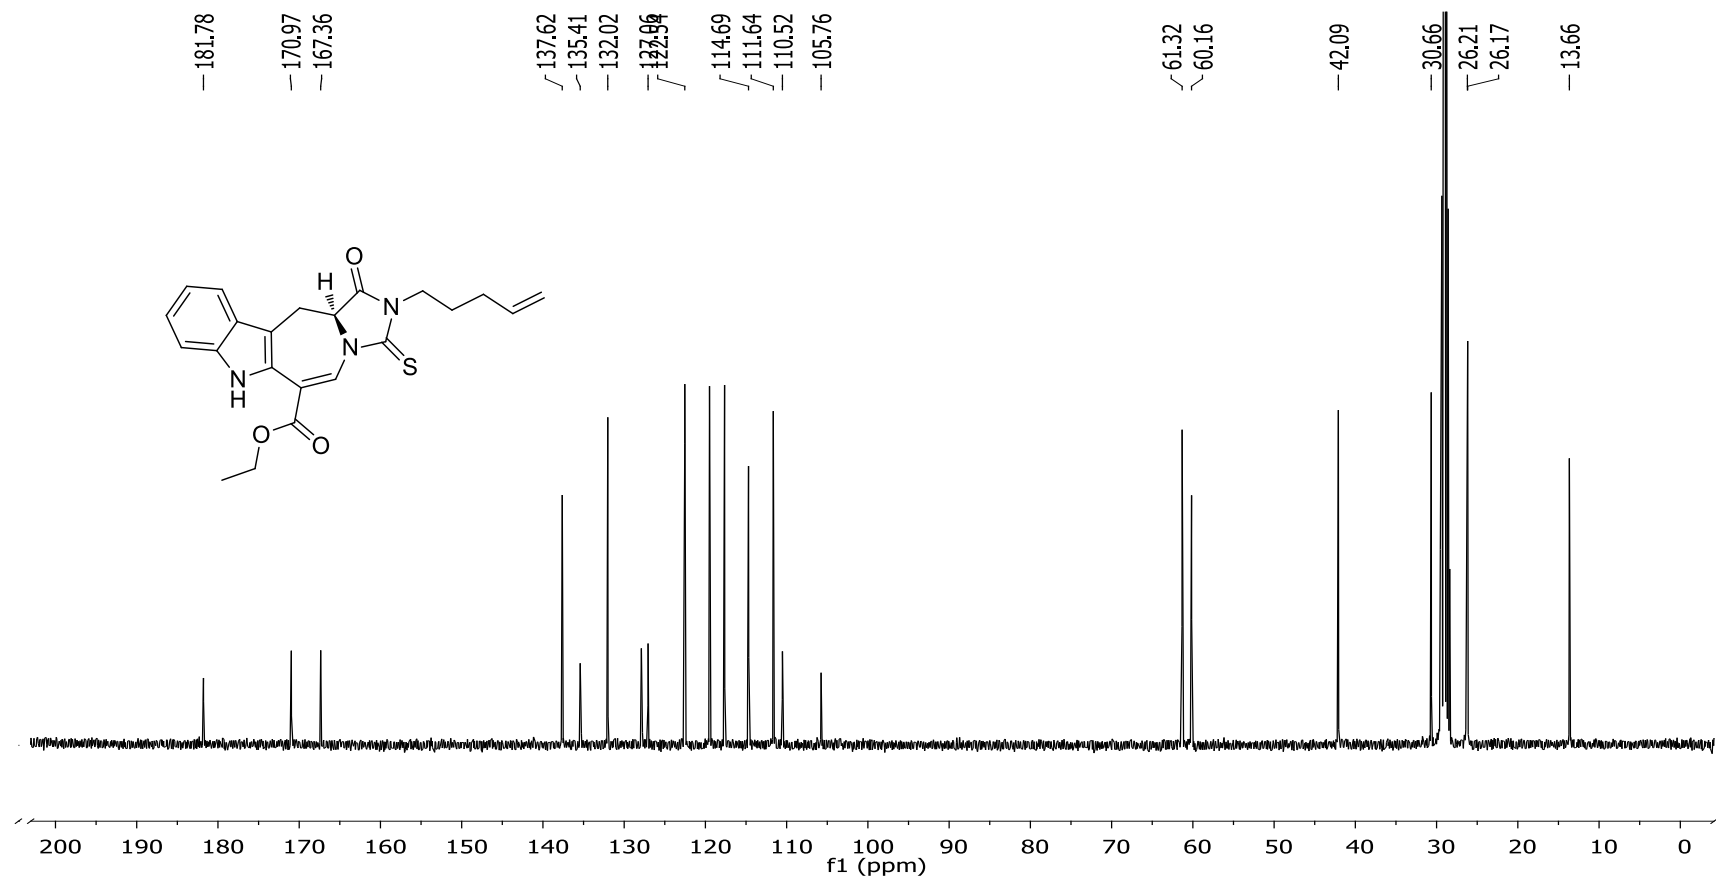

<sup>13</sup>C NMR spectrum (101 MHz) of compound **7I** in acetone-d<sub>6</sub>



201407172908\_ib-N7-064 #352 RT: 1.23 AV: 1 NL: 6.93E7  
T: {0,0} + c EI Full ms [50.00-900.00]

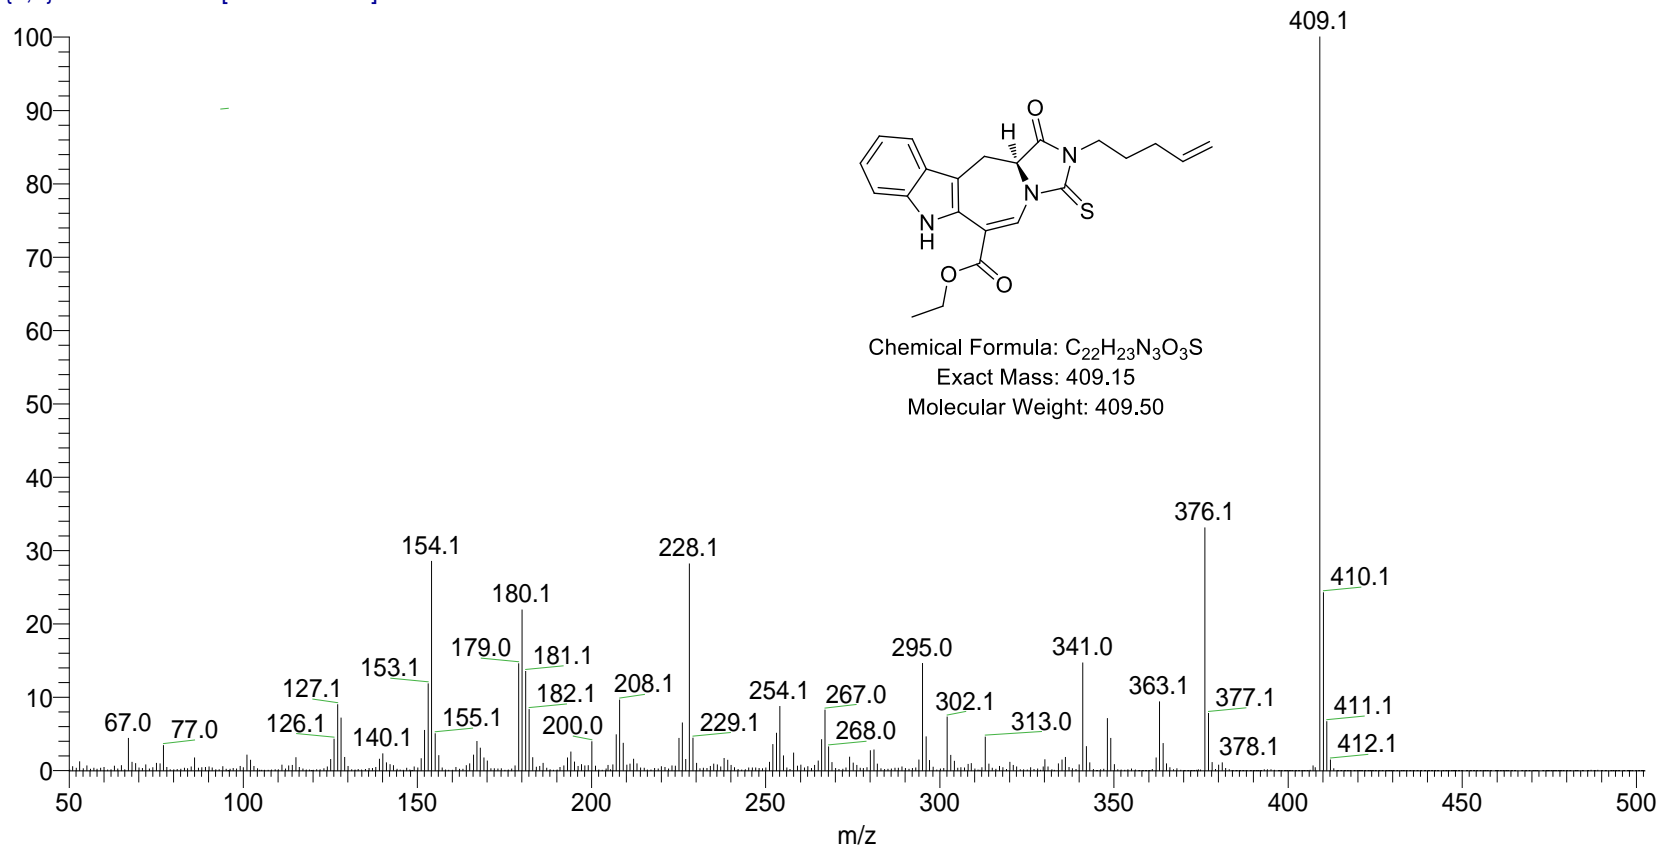

EI-LRMS of compound **71**

D:\Xcalibur\...LIN-14-09\12\9eihr-84-c2

12.09.2014 14:58:29

9eihr-84-c2 #4 RT: 0,17 AV: 1 NL: 3,60E6  
T: + c EI Full ms [ 277,50-435,50]

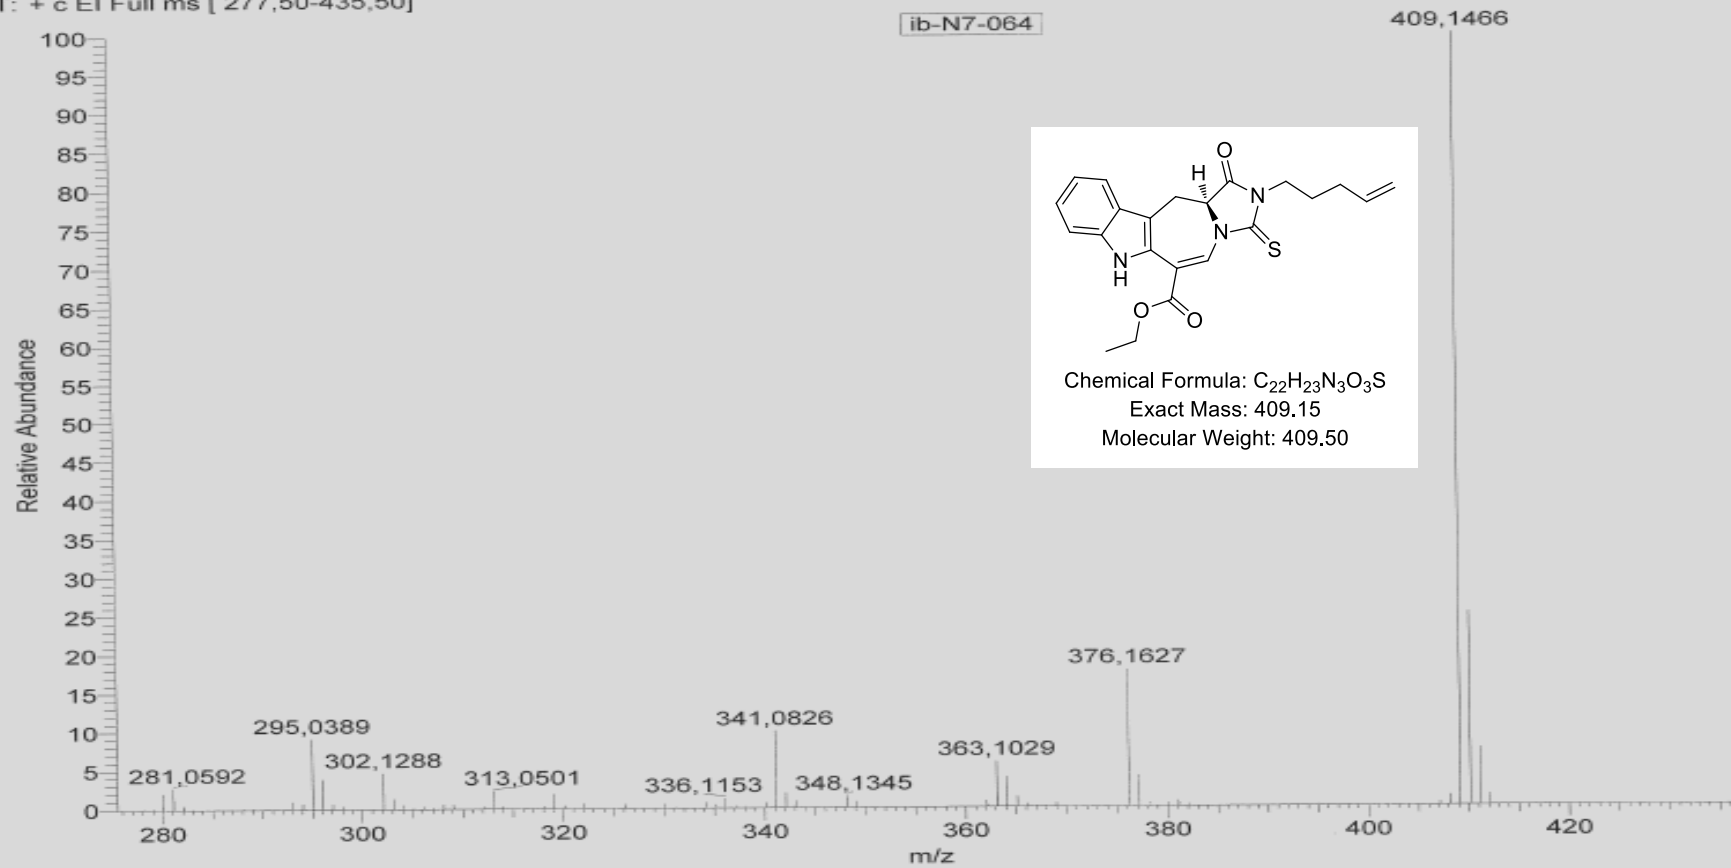

EI-HRMS of compound **71**

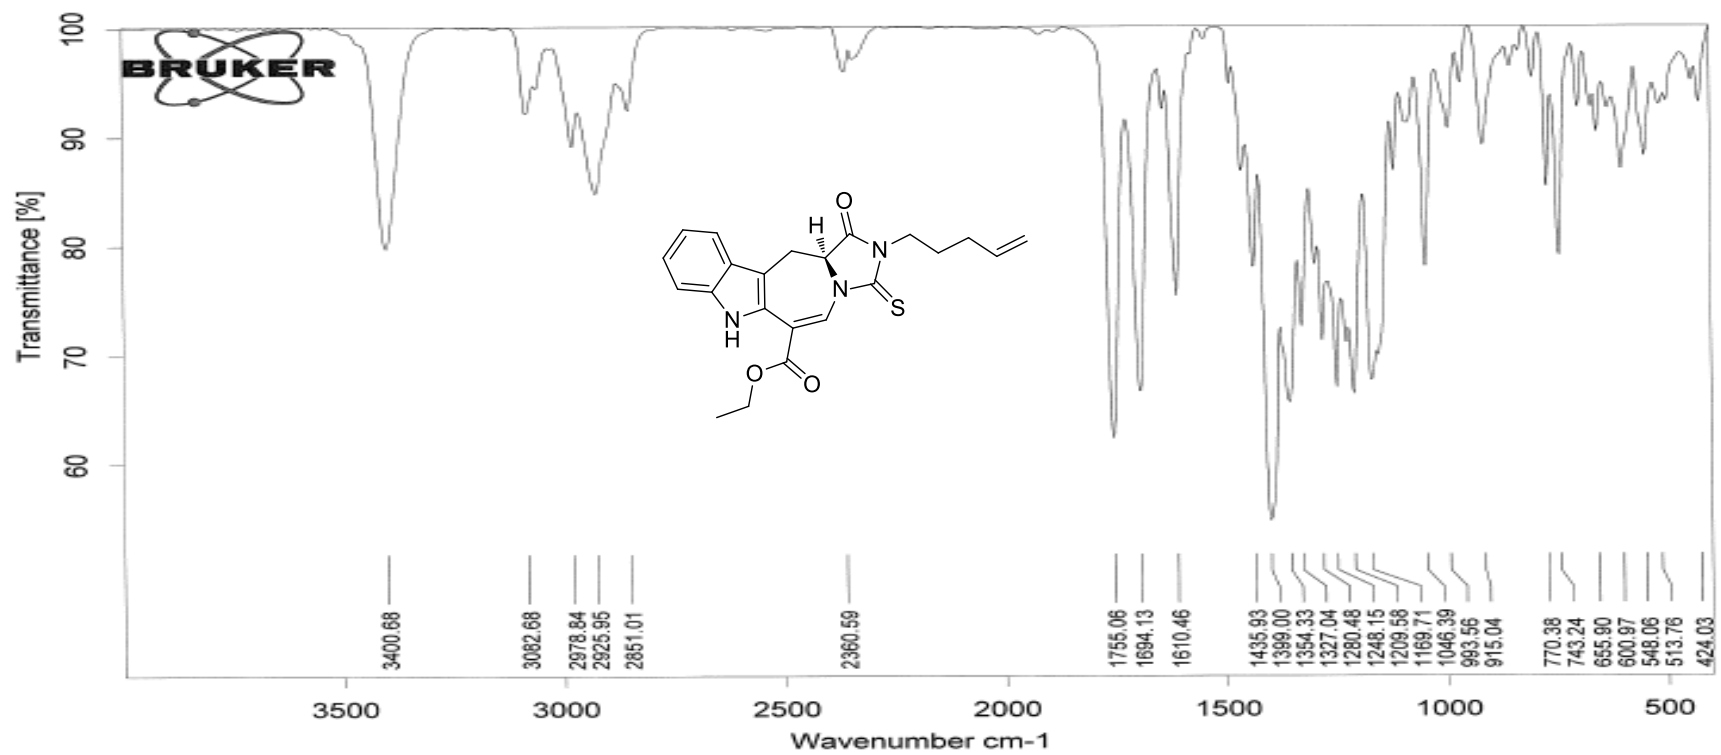

D:\temp-files\FTIR files\20140904\MIR\_TR\_DTGS\_blank KBr\_ib-N7-064.0

MIR\_TR\_DTGS\_blank KBr\_ib-N7-064

Instrument type and / o

2014/9/4

IR spectrum of compound 71

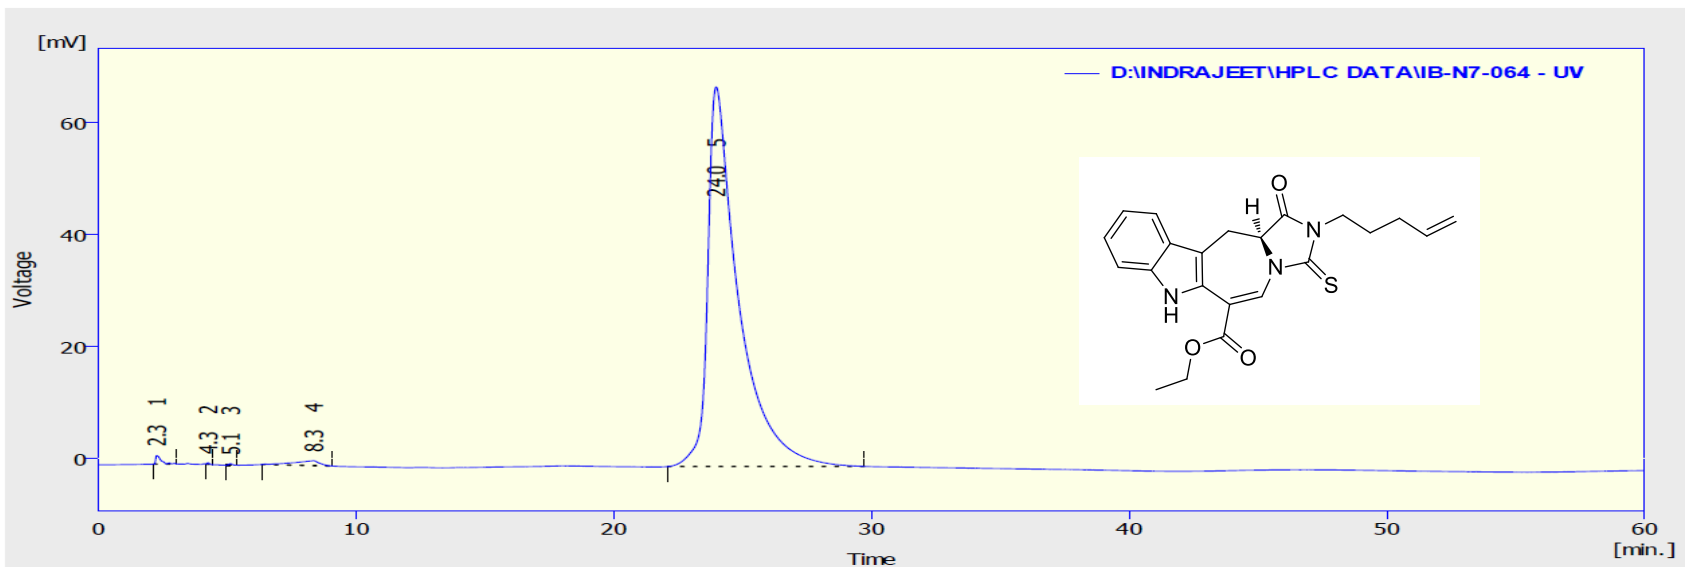

Result Table (Uncal - D:\INDRAJEET\HPLC DATA\IB-N7-064 - UV)

|   | Reten. Time [min] | Area [mV.s] | Height [mV] | Area [%] | Height [%] |
|---|-------------------|-------------|-------------|----------|------------|
| 1 | 2.260             | 22.299      | 1.548       | 0.4      | 2.2        |
| 2 | 4.252             | 1.592       | 0.297       | 0.0      | 0.4        |
| 3 | 5.120             | 2.388       | 0.283       | 0.0      | 0.4        |
| 4 | 8.344             | 61.171      | 0.890       | 1.1      | 1.3        |
| 5 | 23.968            | 5639.881    | 67.852      | 98.5     | 95.7       |
|   | Total             | 5727.331    | 70.870      | 100.0    | 100.0      |

## HPLC of compound 71

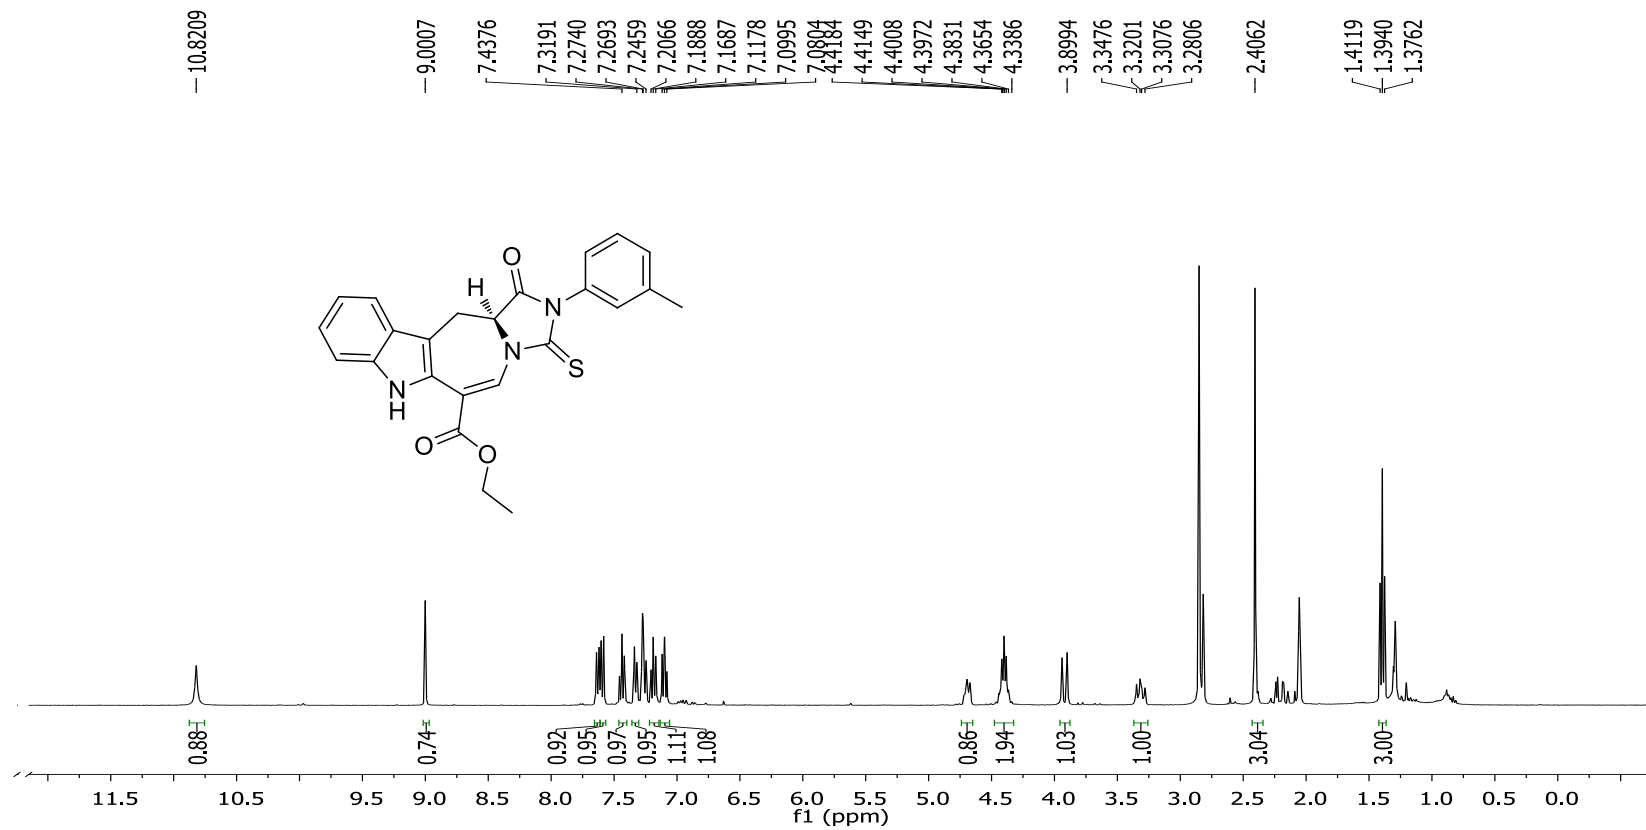

<sup>1</sup>H NMR spectrum (400 MHz) of compound **7m** in acetone-d<sub>6</sub>

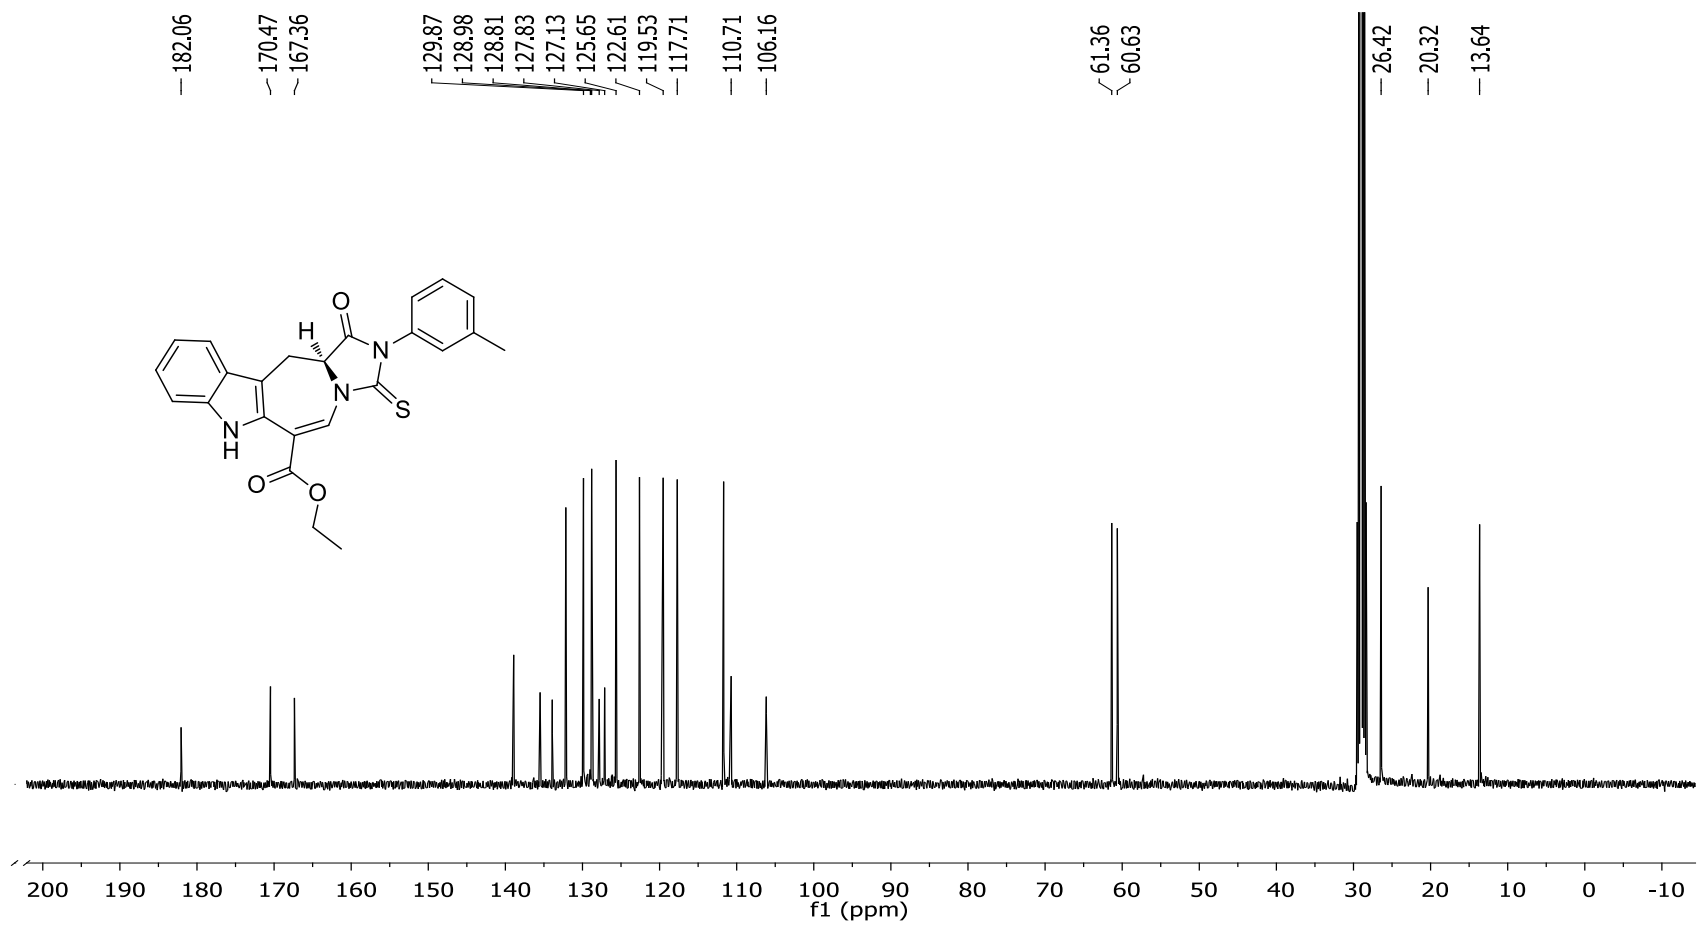

<sup>13</sup>C NMR spectrum (101 MHz) of compound **7m** in acetone-d<sub>6</sub>

2014080103\_TT-LN2-039 #464 RT: 1.61 AV: 1 NL: 2.17E7  
T: {0,0} + c EI Full ms [50.00-900.00]

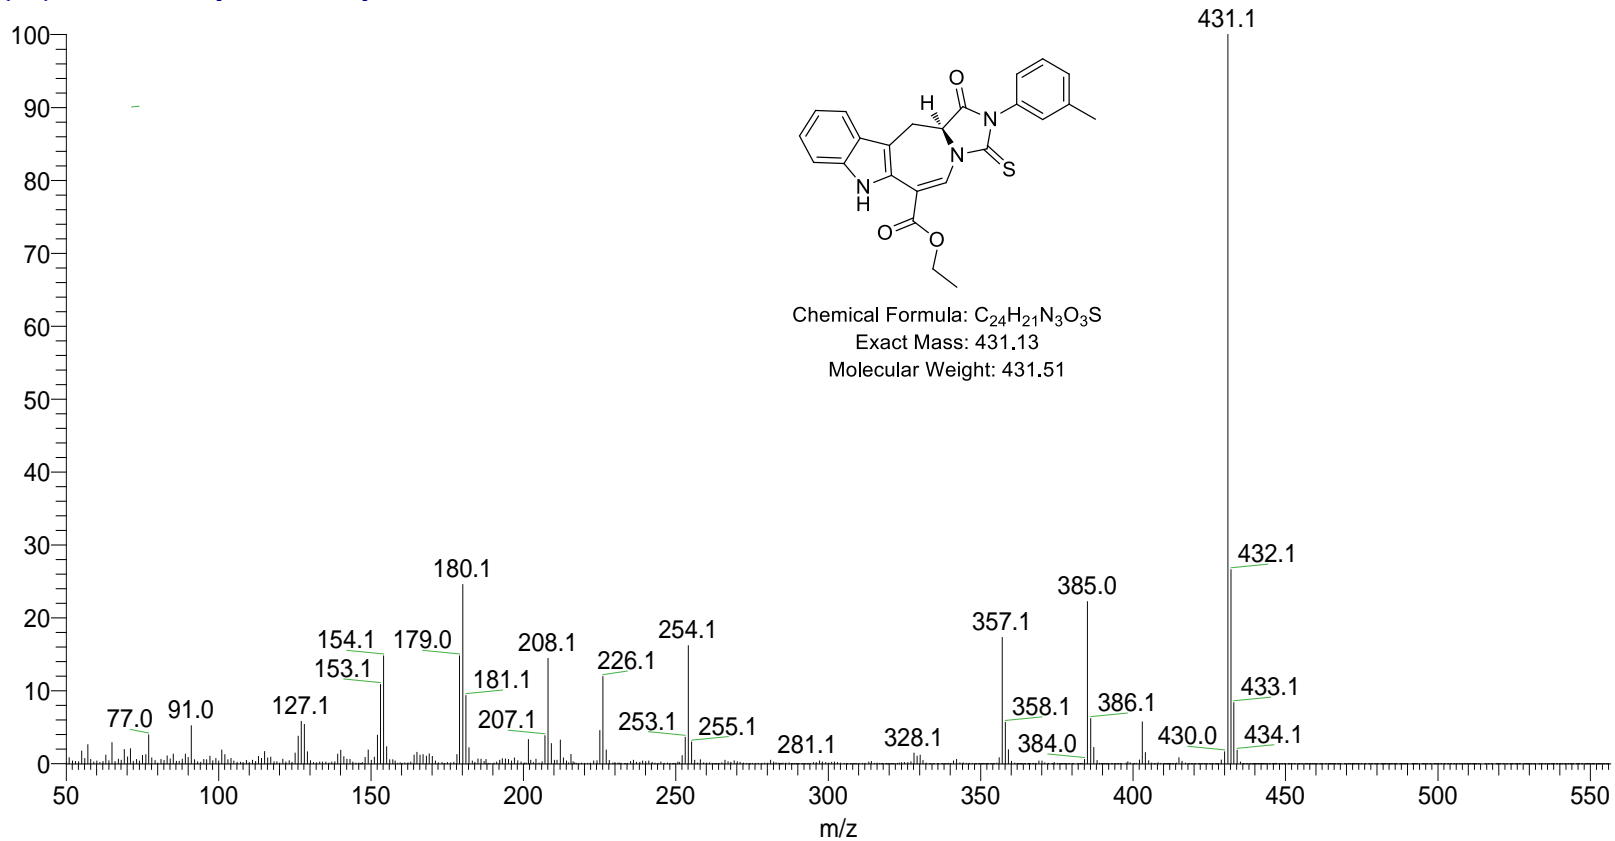

EI-LRMS of compound **7m**

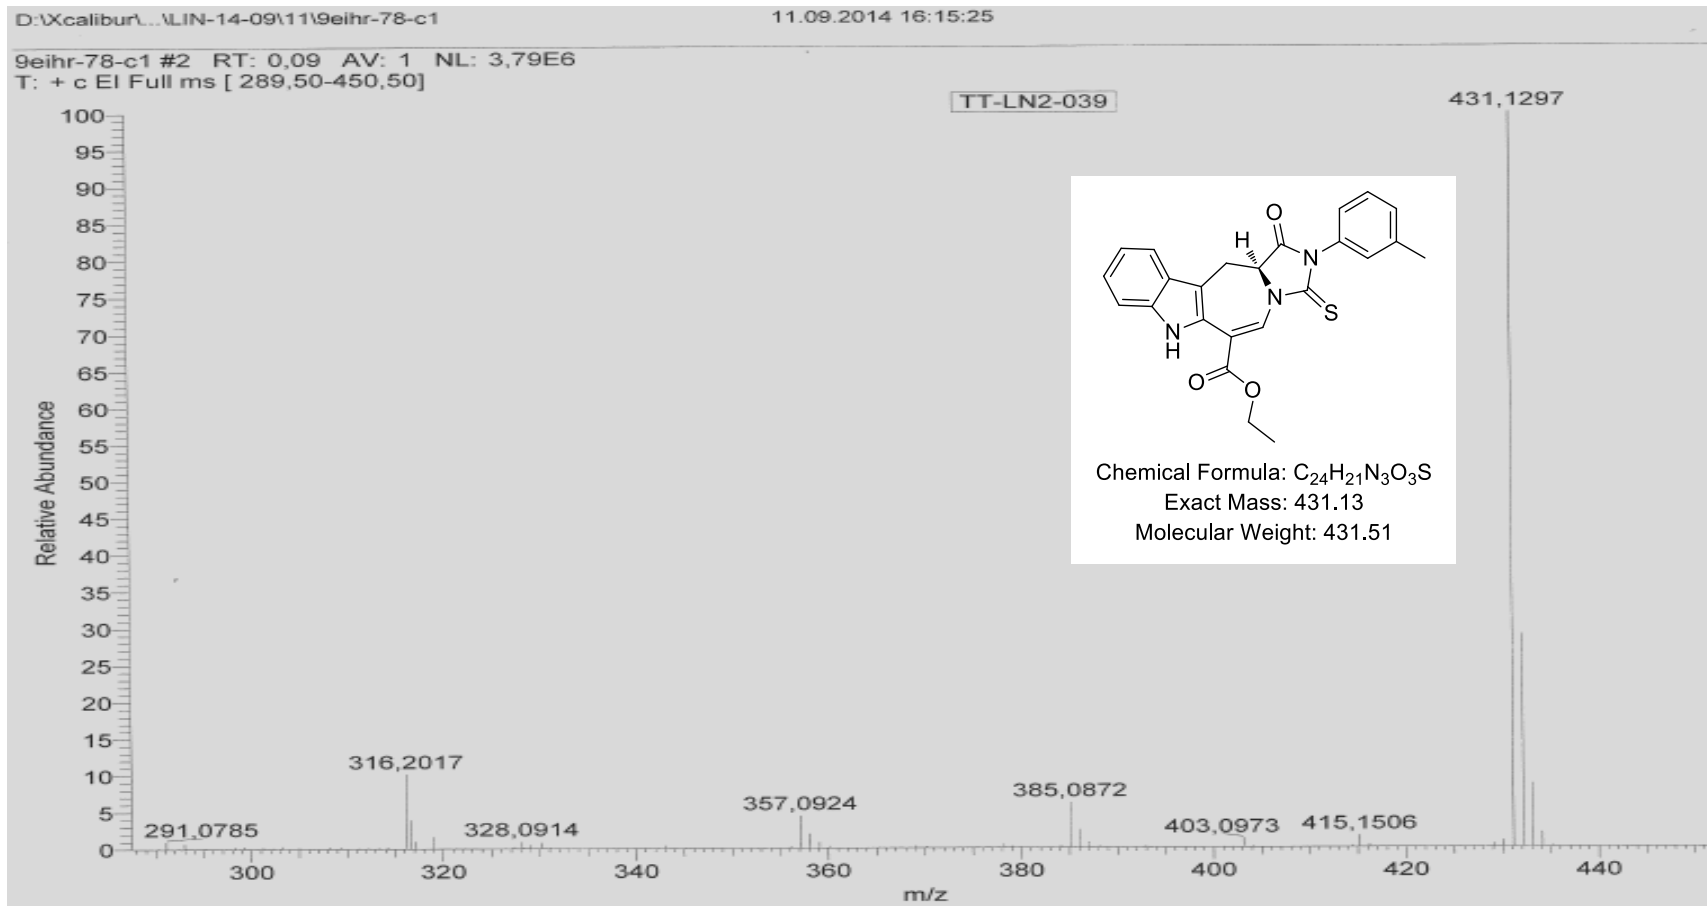

EI-HRMS of compound **7m**



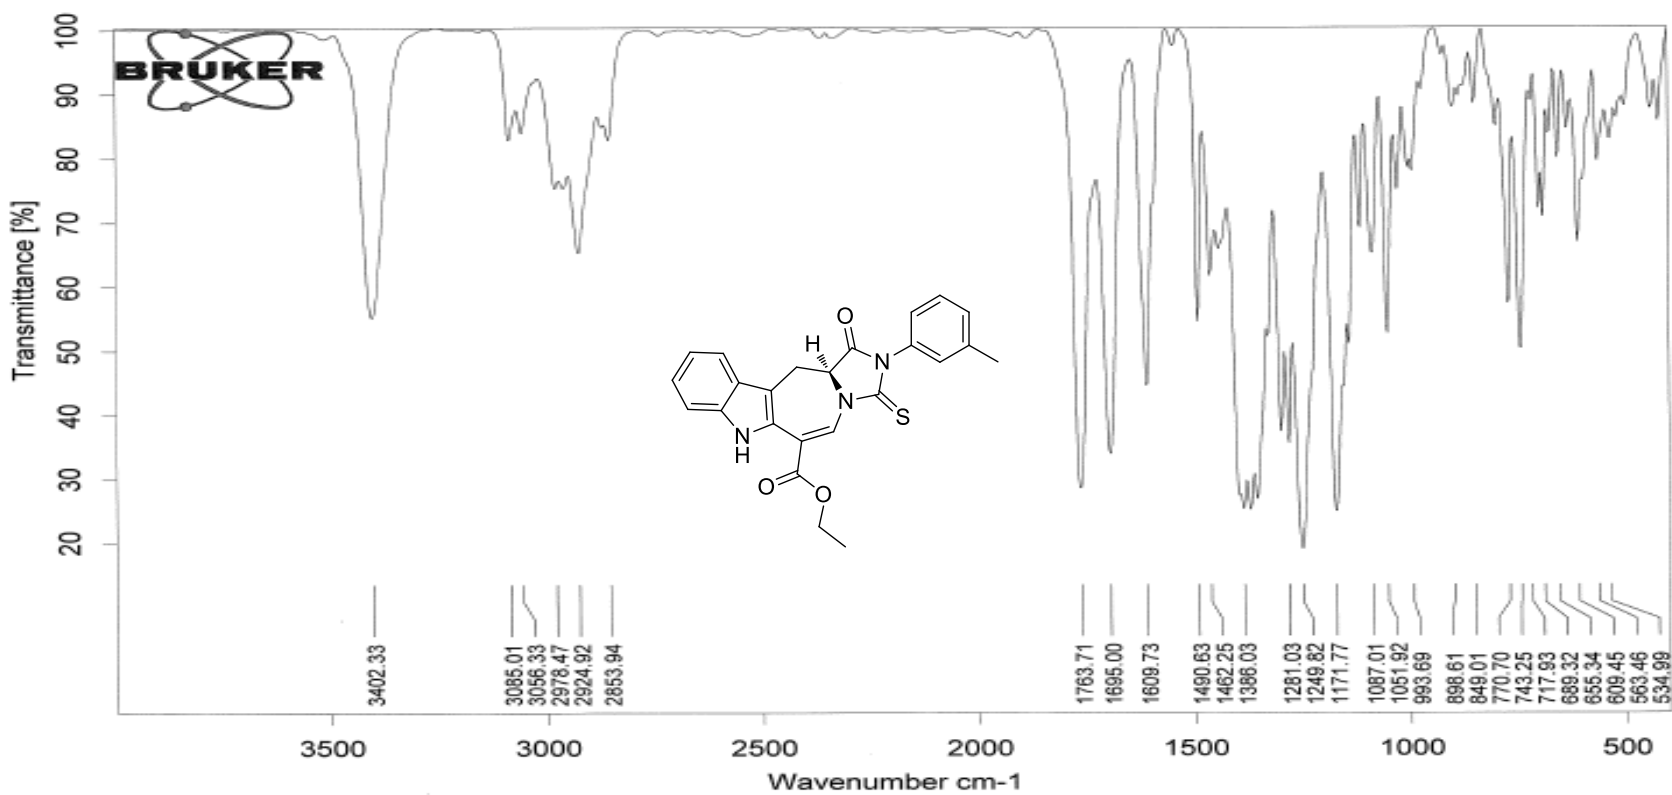

|                                                                      |                                  |                    |          |
|----------------------------------------------------------------------|----------------------------------|--------------------|----------|
| D:\temp-files\FTIR files\20140904\MIR_TR_DTGS_blank KBr_TT-LN2-039.0 | MIR_TR_DTGS_blank KBr_TT-LN2-039 | Instrument type an | 2014/9/4 |
|----------------------------------------------------------------------|----------------------------------|--------------------|----------|

IR spectrum of compound **7m**

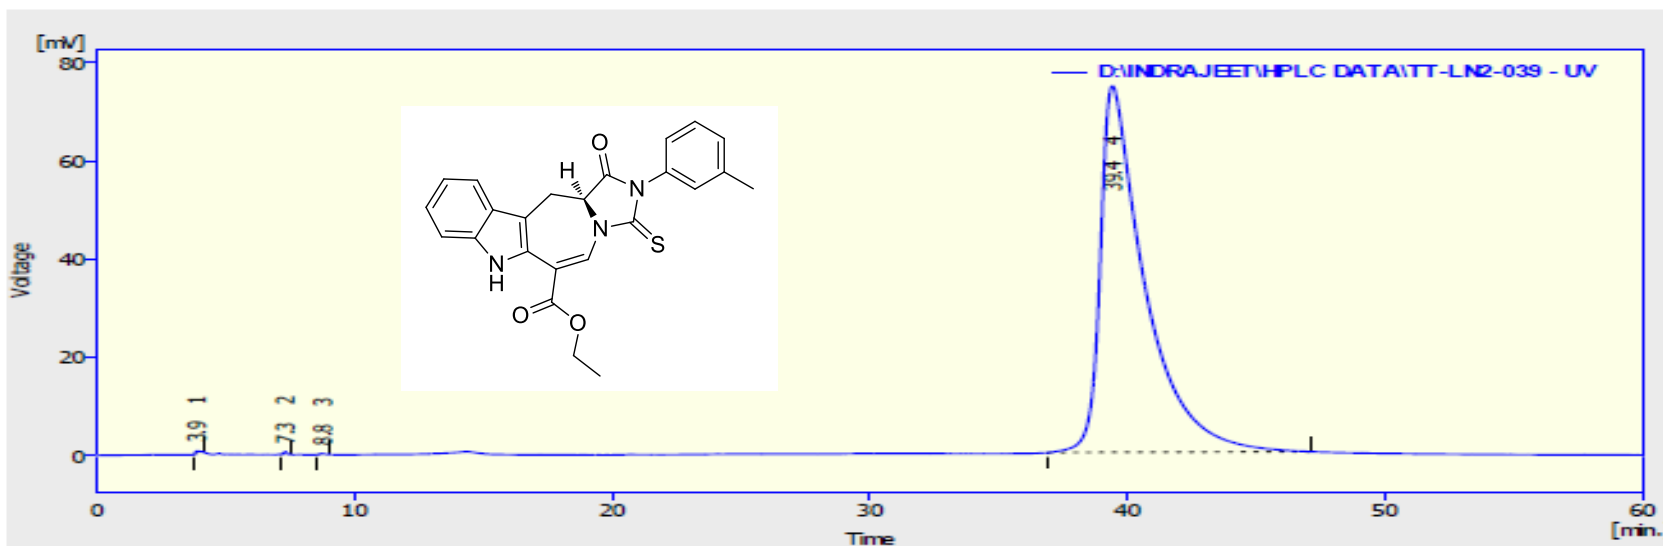

Result Table (Uncal - D:\INDRAJEET\HPLC DATA\TT-LN2-039 - UV)

|       | Reten. Time [min] | Area [mV.s] | Height [mV] | Area [%] | Height [%] |
|-------|-------------------|-------------|-------------|----------|------------|
| 1     | 3.868             | 6.529       | 0.578       | 0.1      | 0.8        |
| 2     | 7.306             | 4.854       | 0.578       | 0.1      | 0.8        |
| 3     | 8.760             | 2.564       | 0.223       | 0.0      | 0.3        |
| 4     | 39.424            | 8987.213    | 74.588      | 99.8     | 98.2       |
| Total |                   | 9001.160    | 75.966      | 100.0    | 100.0      |

HPLC of compound **7m**

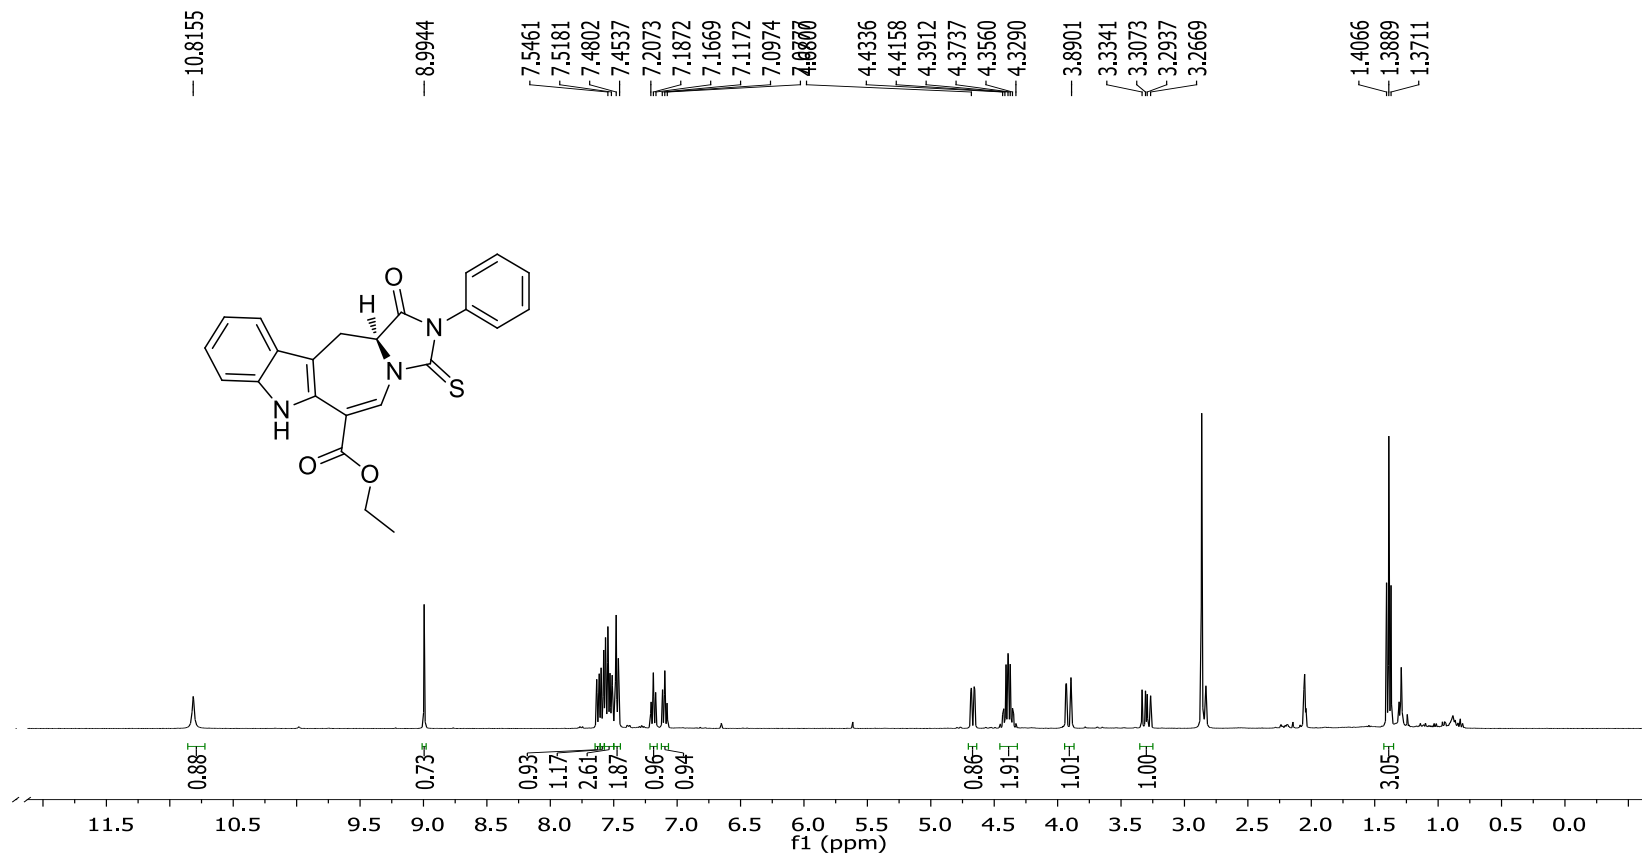

$^1\text{H}$  NMR spectrum (400 MHz) of compound **7n** in acetone- $\text{d}_6$

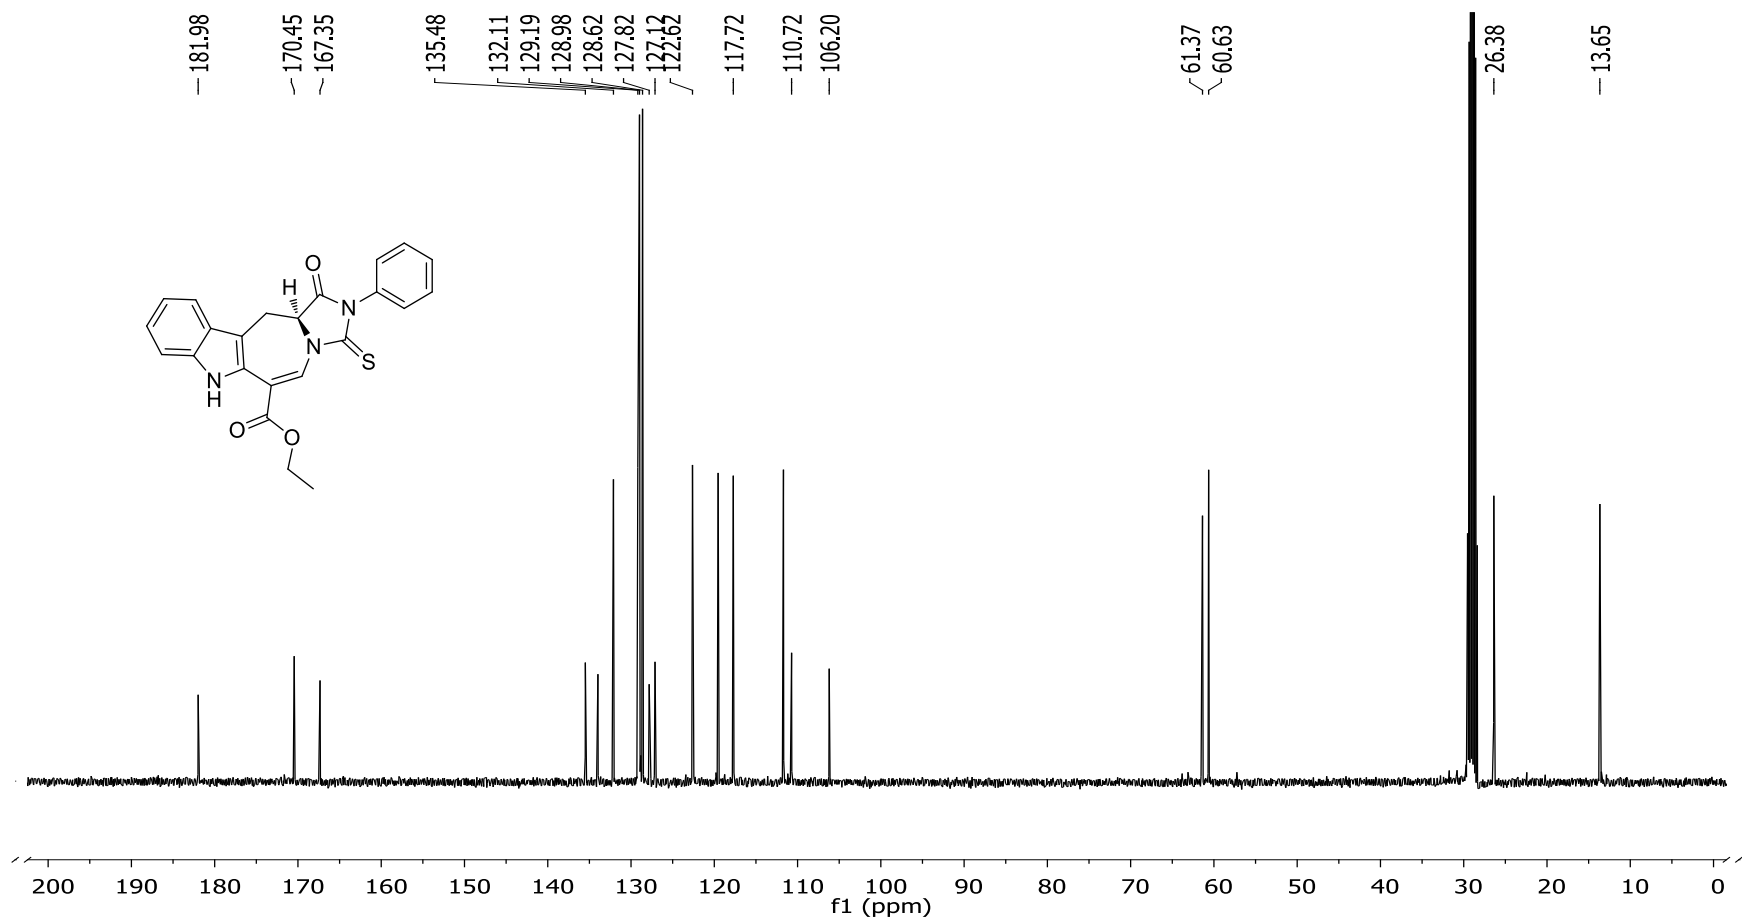

<sup>13</sup>C NMR spectrum (101 MHz) of compound **7n** in acetone-d<sub>6</sub>

2014080816\_TT-LN2-041 #345 RT: 1.20 AV: 1 NL: 2.87E7  
T: {0,0} + c EI Full ms [50.00-1050.00]

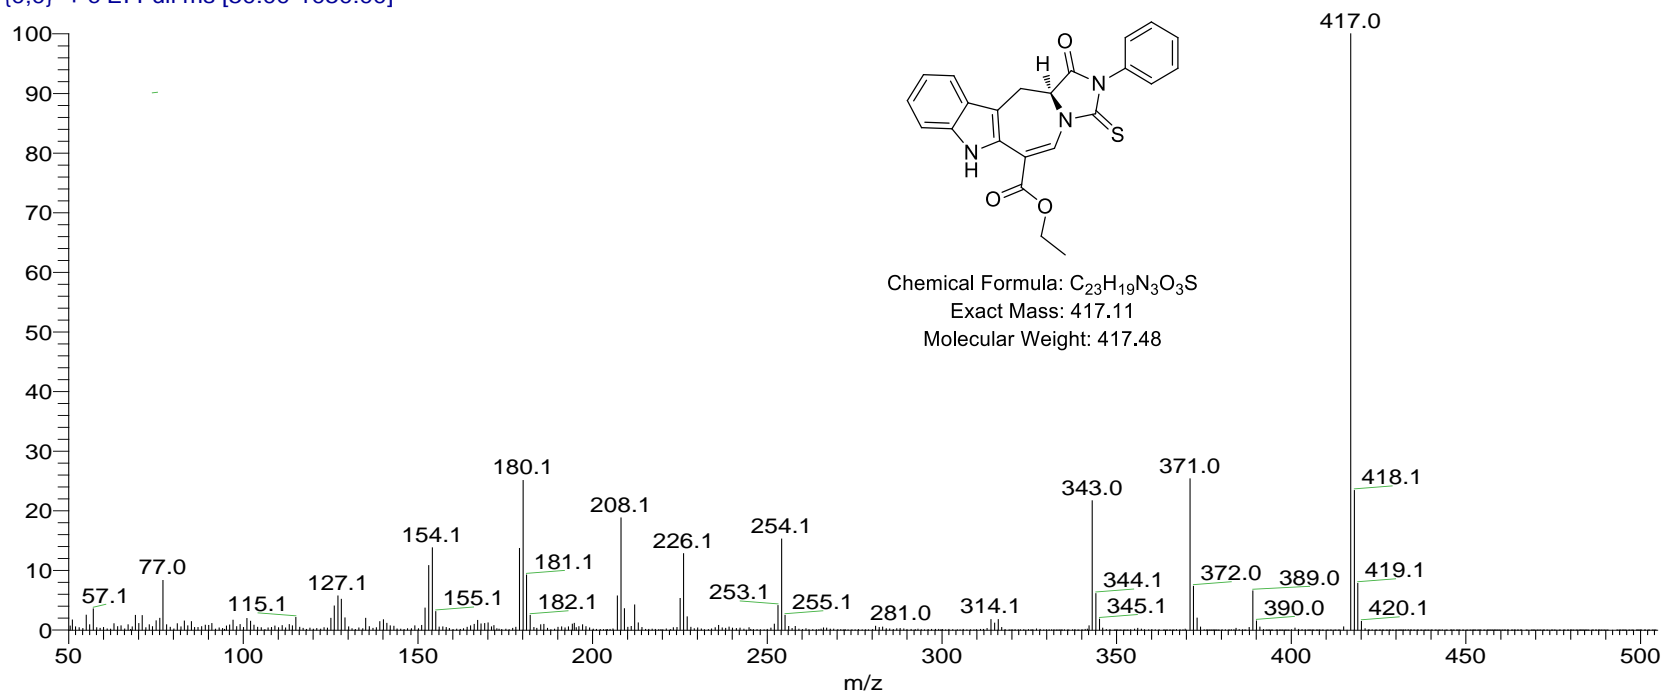

EI-LRMS of compound 7n

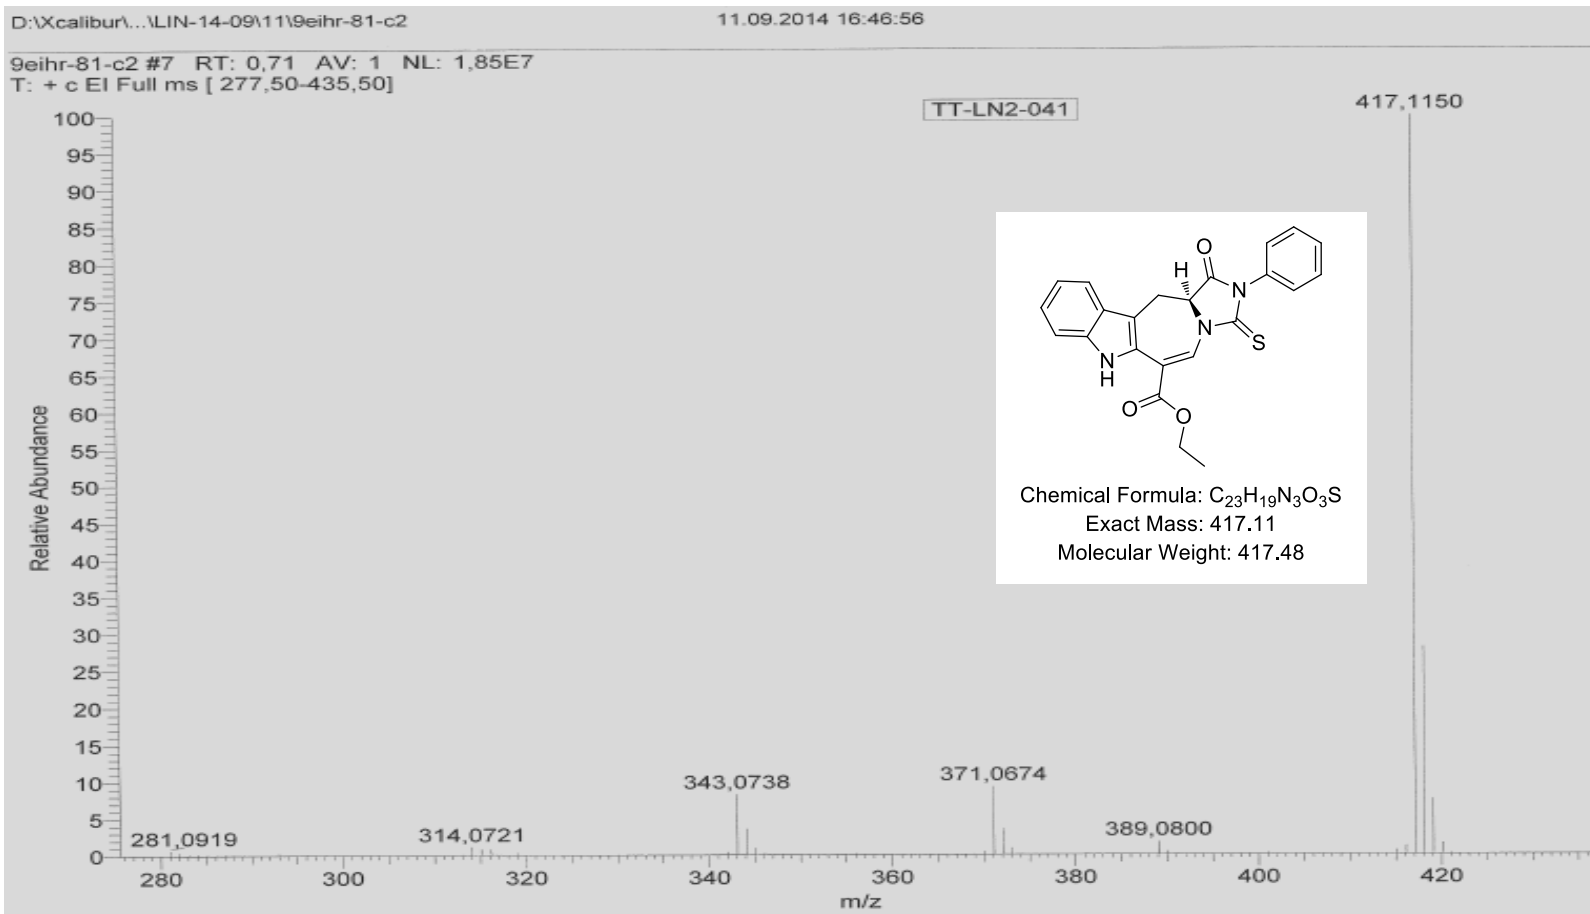

EI-HRMS of compound **7n**

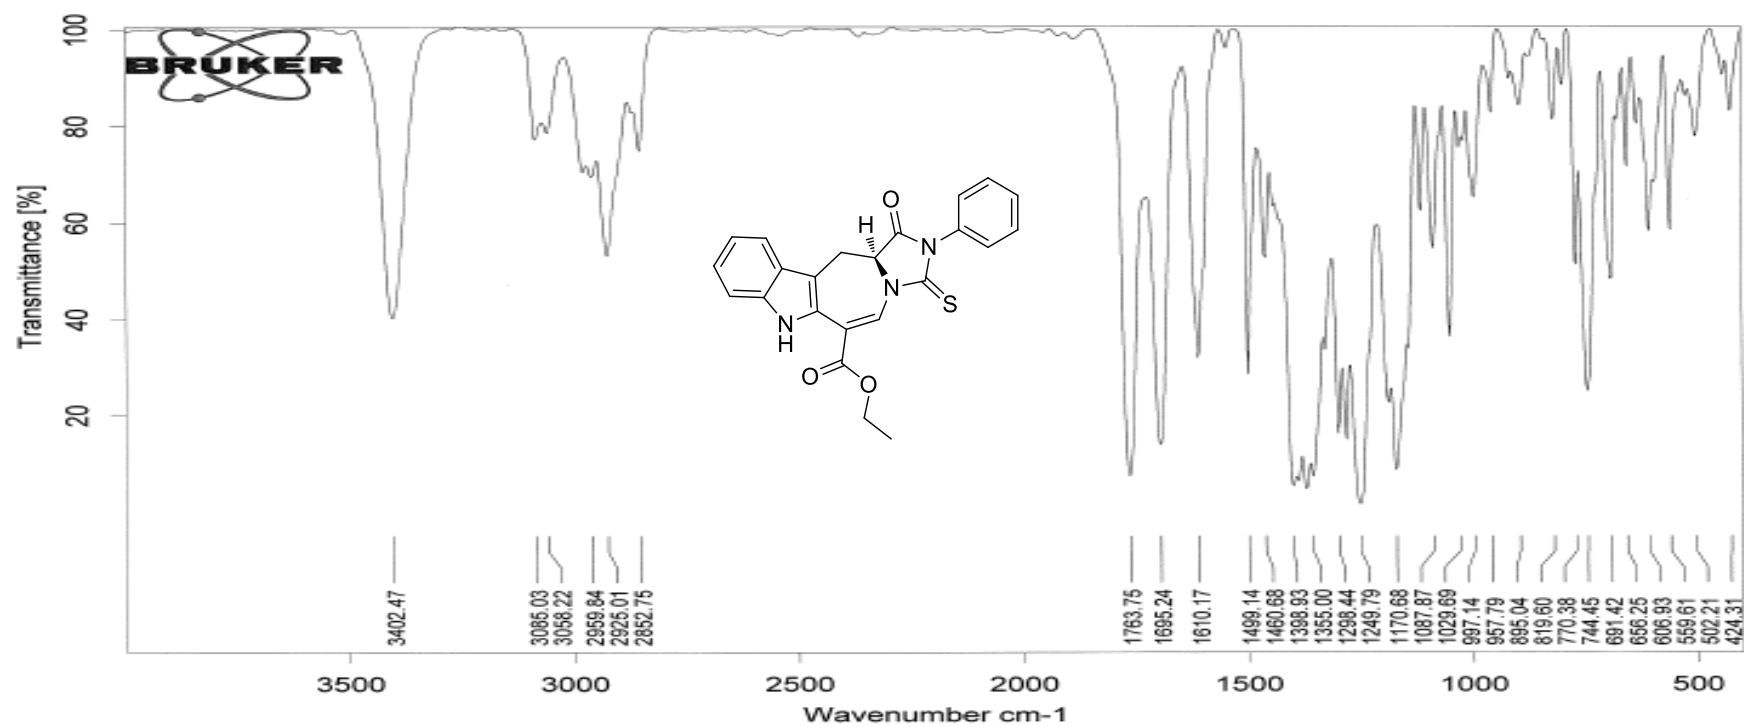

|                                                                      |                                  |                    |          |
|----------------------------------------------------------------------|----------------------------------|--------------------|----------|
| D:\temp-files\FTIR files\20140904\MIR_TR_DTGS_blank KBr_TT-LN2-041.0 | MIR_TR_DTGS_blank KBr_TT-LN2-041 | Instrument type an | 2014/9/4 |
|----------------------------------------------------------------------|----------------------------------|--------------------|----------|

IR spectrum of compound 7n

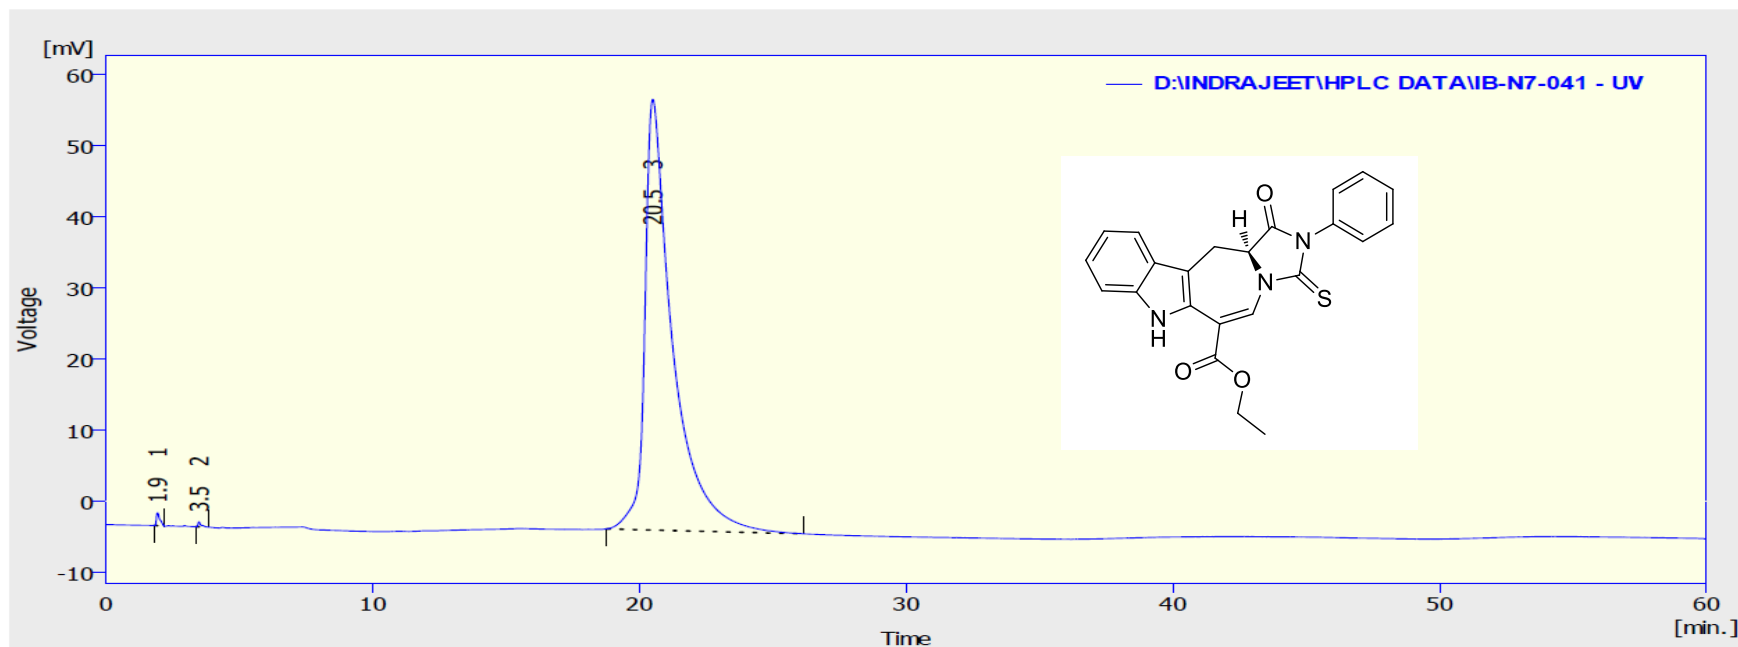

Result Table (Uncal - D:\INDRAJEET\HPLC DATA\IB-N7-041 - UV)

|   | Reten. Time [min] | Area [mV.s] | Height [mV] | Area [%] | Height [%] |
|---|-------------------|-------------|-------------|----------|------------|
| 1 | 1.932             | 16.755      | 1.822       | 0.4      | 2.9        |
| 2 | 3.484             | 5.681       | 0.709       | 0.1      | 1.1        |
| 3 | 20.500            | 4392.030    | 60.551      | 99.5     | 96.0       |
|   | Total             | 4414.466    | 63.082      | 100.0    | 100.0      |

HPLC of compound 7n



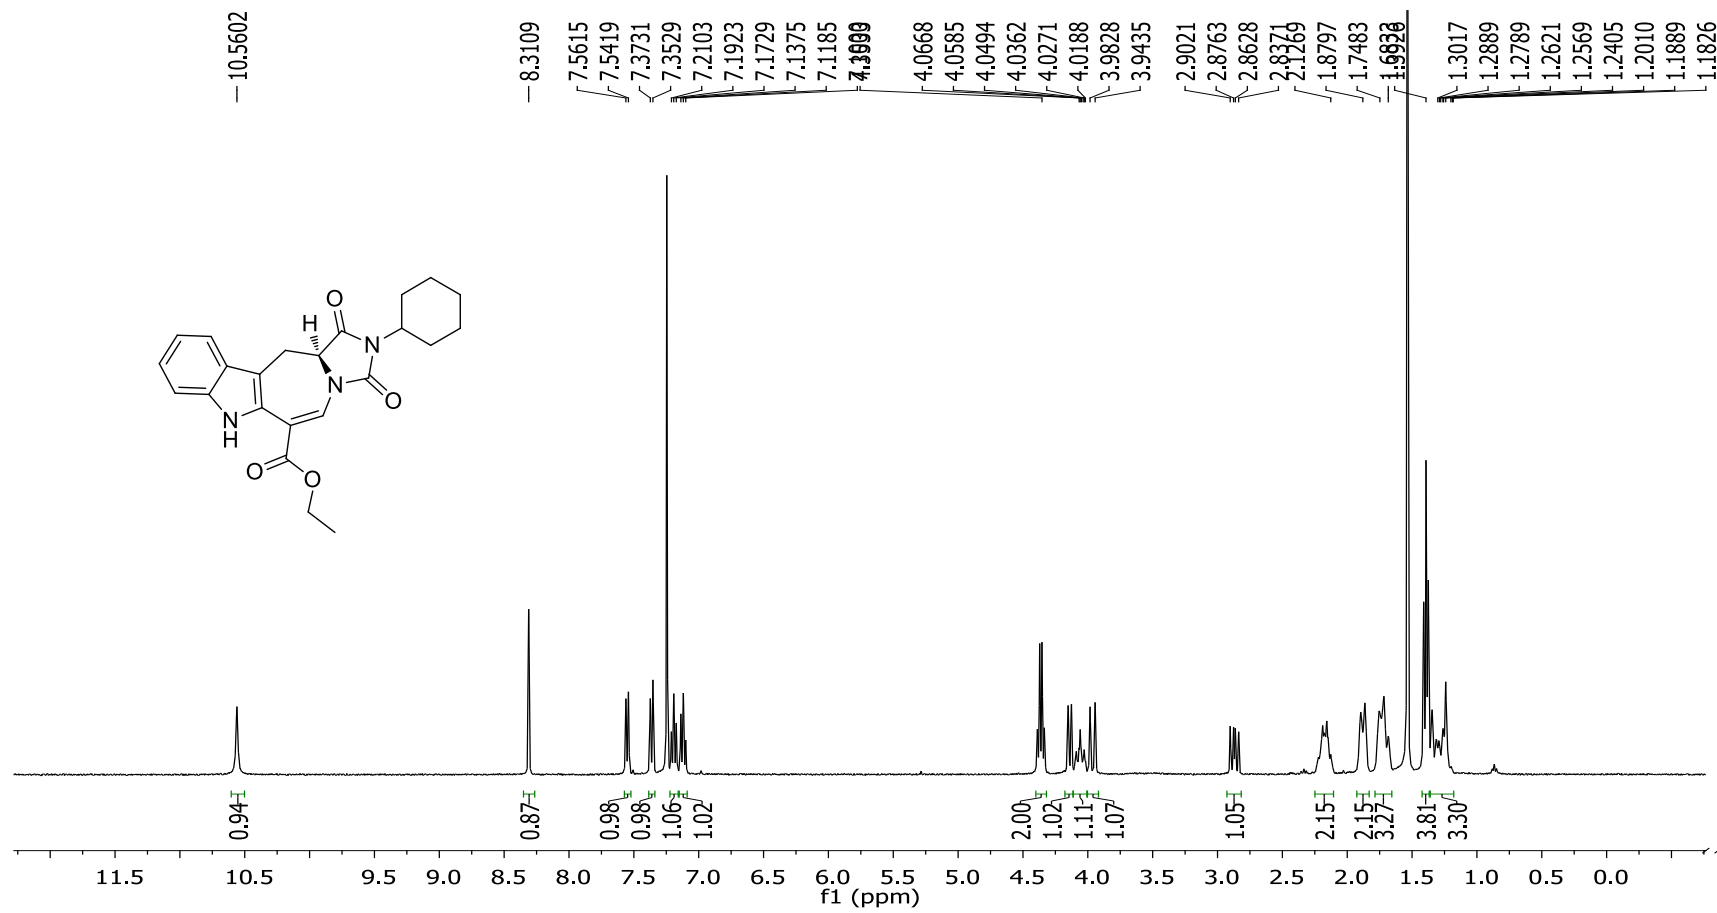

<sup>1</sup>H NMR spectrum (400 MHz) of compound **7o** in CDCl<sub>3</sub>

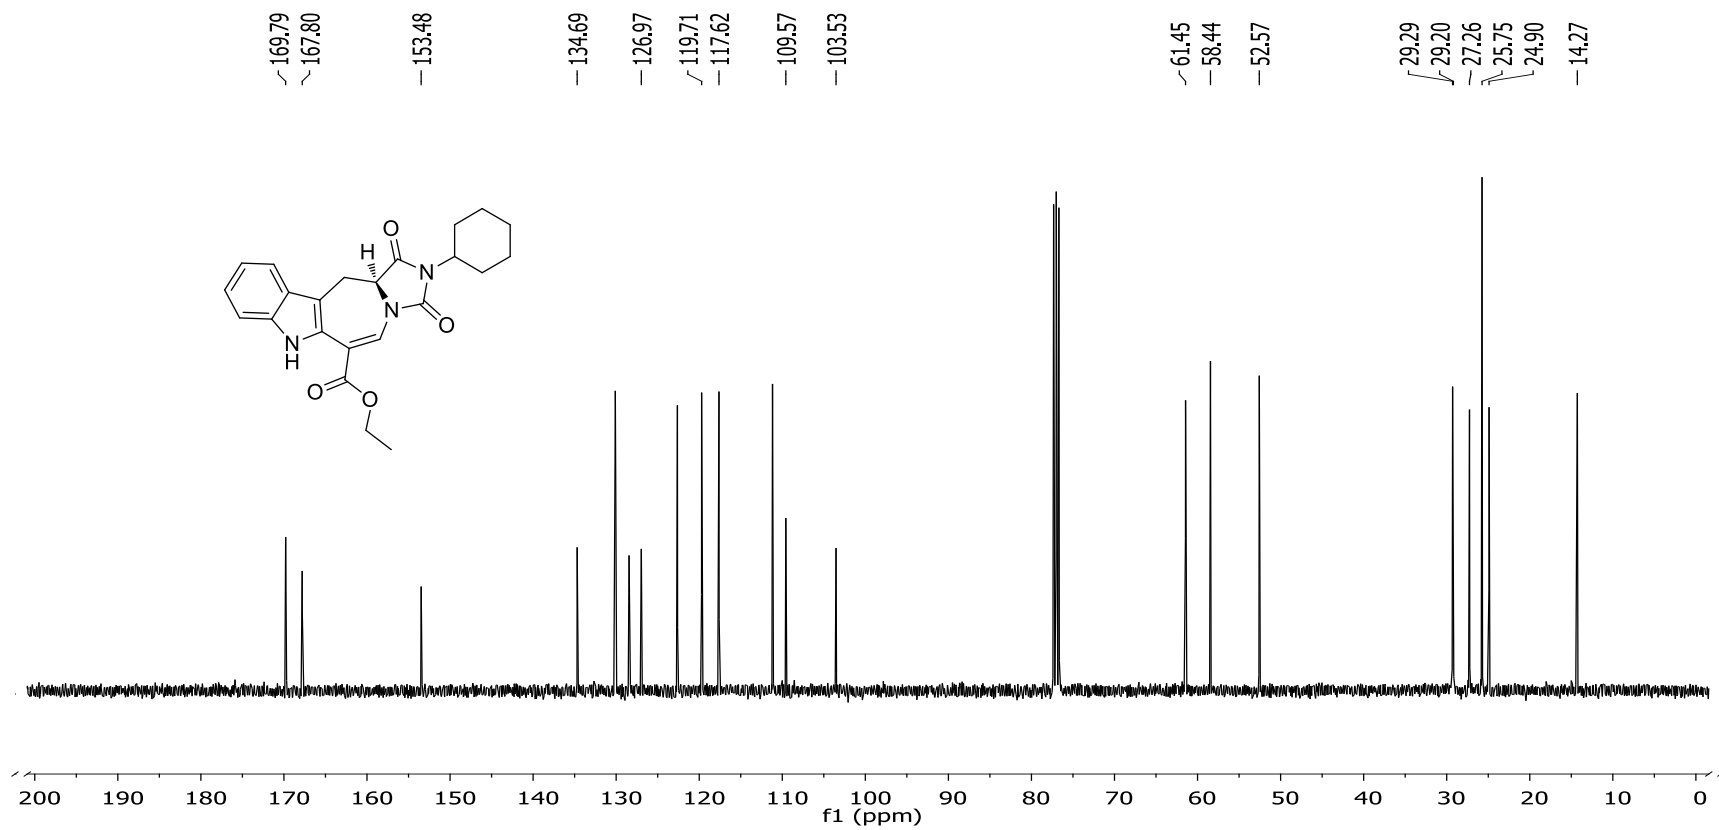

<sup>13</sup>C NMR spectrum (101 MHz) of compound **7o** in CDCl<sub>3</sub>

2014070914\_TT-LN1-075 #342 RT: 1.19 AV: 1 NL: 9.81E6  
T: {0,0} + c EI Full ms [50.00-900.00]

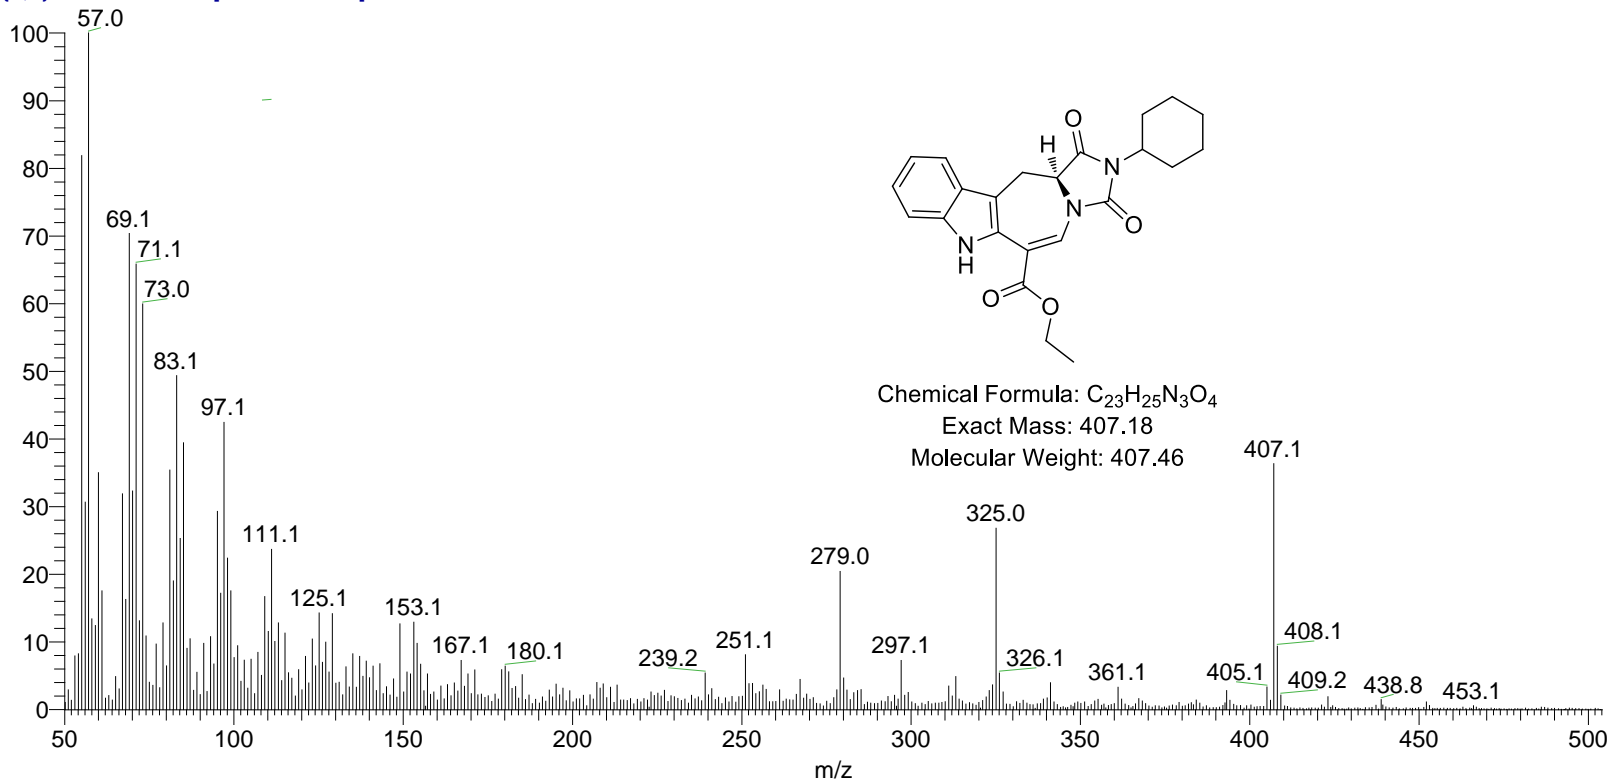

EI-LRMS of compound **7o**

9eihr-85-c1 #6 RT: 0,25 AV: 1 NL: 1,88E7  
T: + c EI Full ms [ 277,50-435,50]

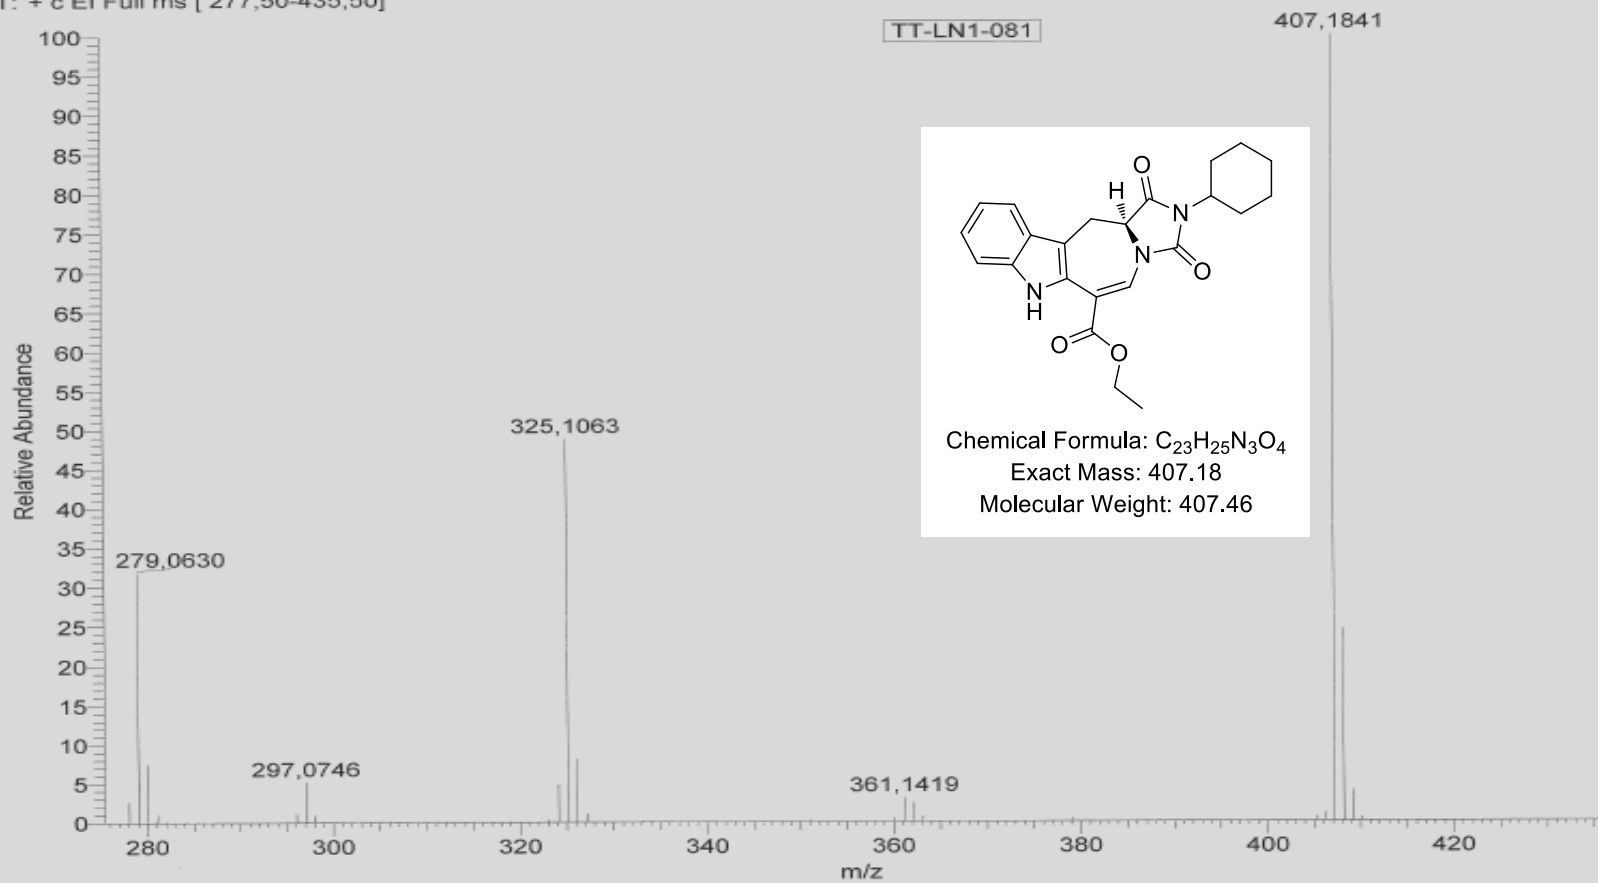

EI-HRMS of compound **7o**

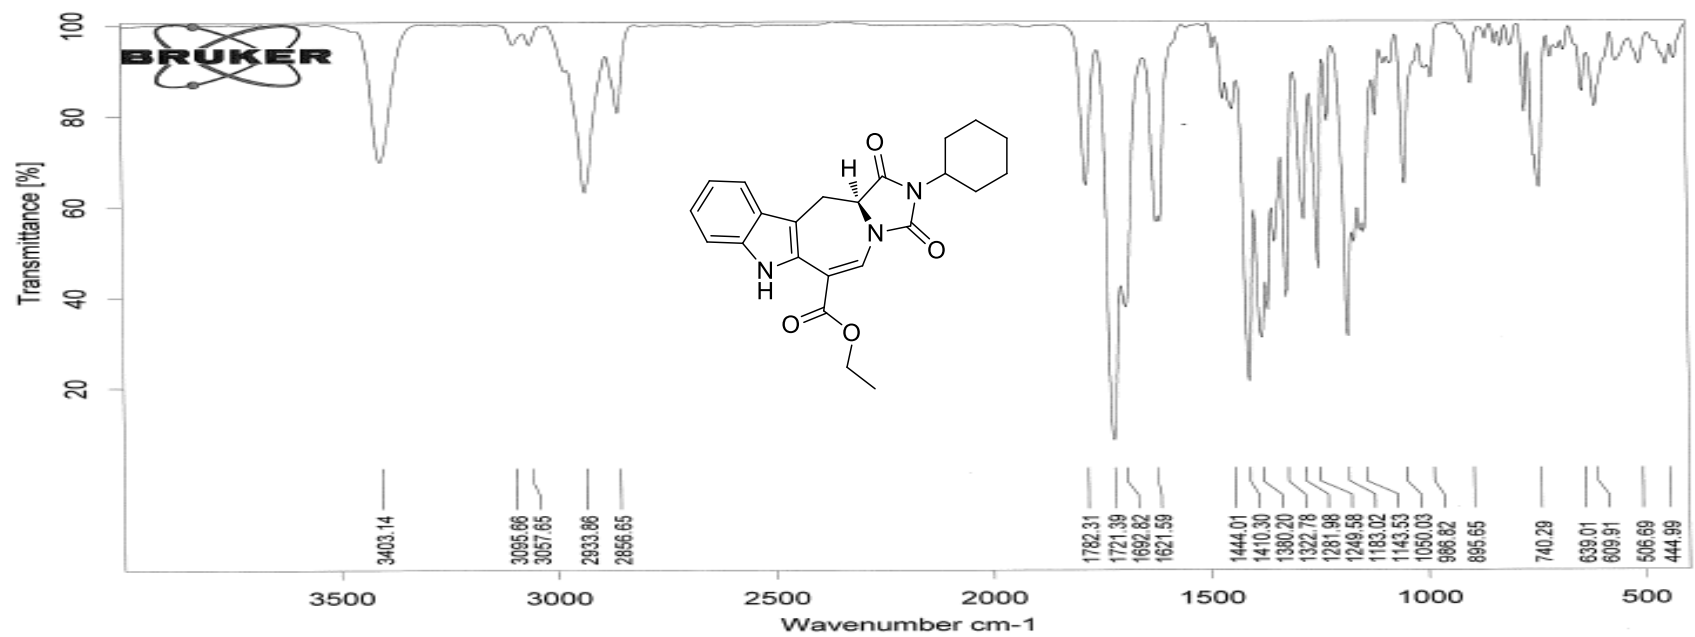

D:\temp-files\FTIR files\20140904\MIR\_TR\_DTGS\_blank KBr\_TT-LN1-081.0

MIR\_TR\_DTGS\_blank KBr\_TT-LN1-081

Instrument type an

2014/9/4

IR spectrum of compound **7o**

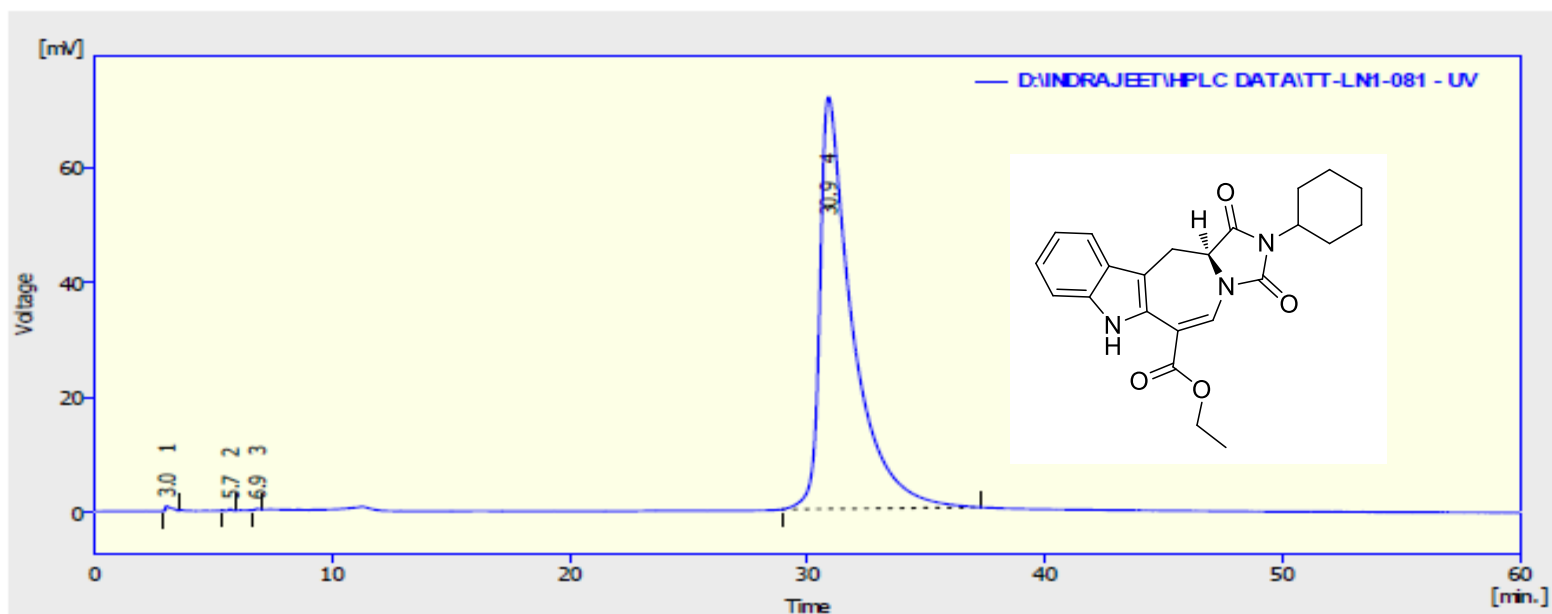

Result Table (Uncal - D:\INDRAJEET\HPLC DATA\TT-LN1-081 - UV)

|   | Reten. Time [min] | Area [mV.s] | Height [mV] | Area [%] | Height [%] |
|---|-------------------|-------------|-------------|----------|------------|
| 1 | 3.020             | 15.492      | 0.878       | 0.2      | 1.2        |
| 2 | 5.700             | 2.603       | 0.302       | 0.0      | 0.4        |
| 3 | 6.852             | 2.342       | 0.237       | 0.0      | 0.3        |
| 4 | 30.900            | 6827.827    | 71.801      | 99.7     | 98.1       |
|   | Total             | 6848.264    | 73.217      | 100.0    | 100.0      |

HPLC of compound 7o

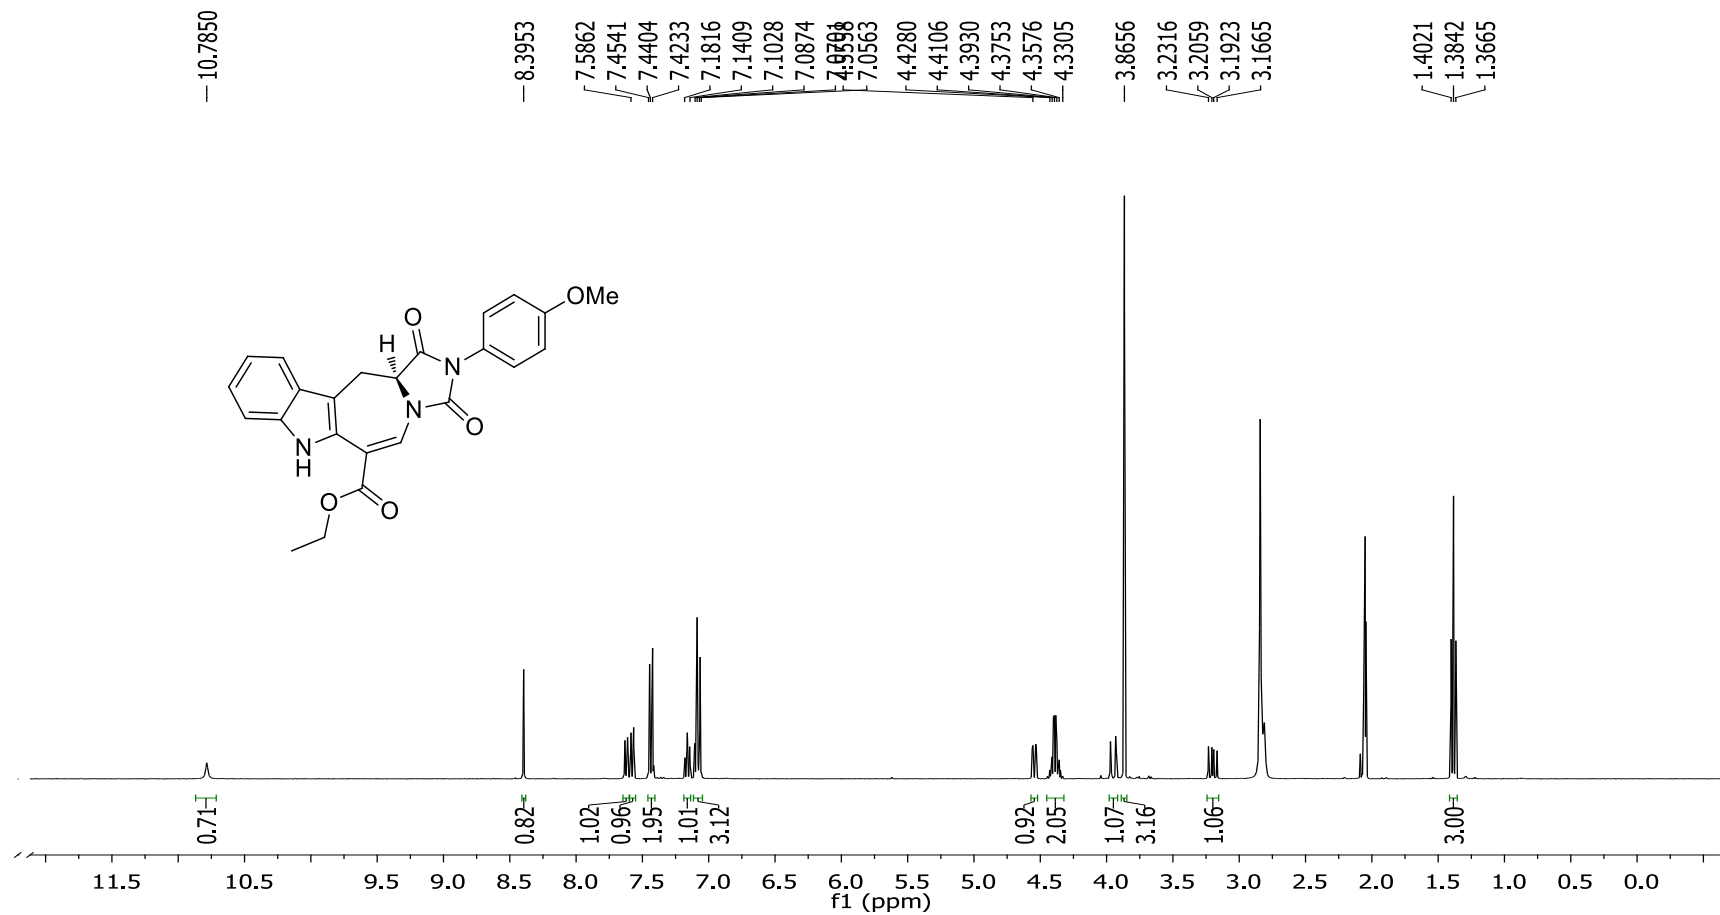

<sup>1</sup>H NMR spectrum (400 MHz) of compound **7p** in acetone-d<sub>6</sub>

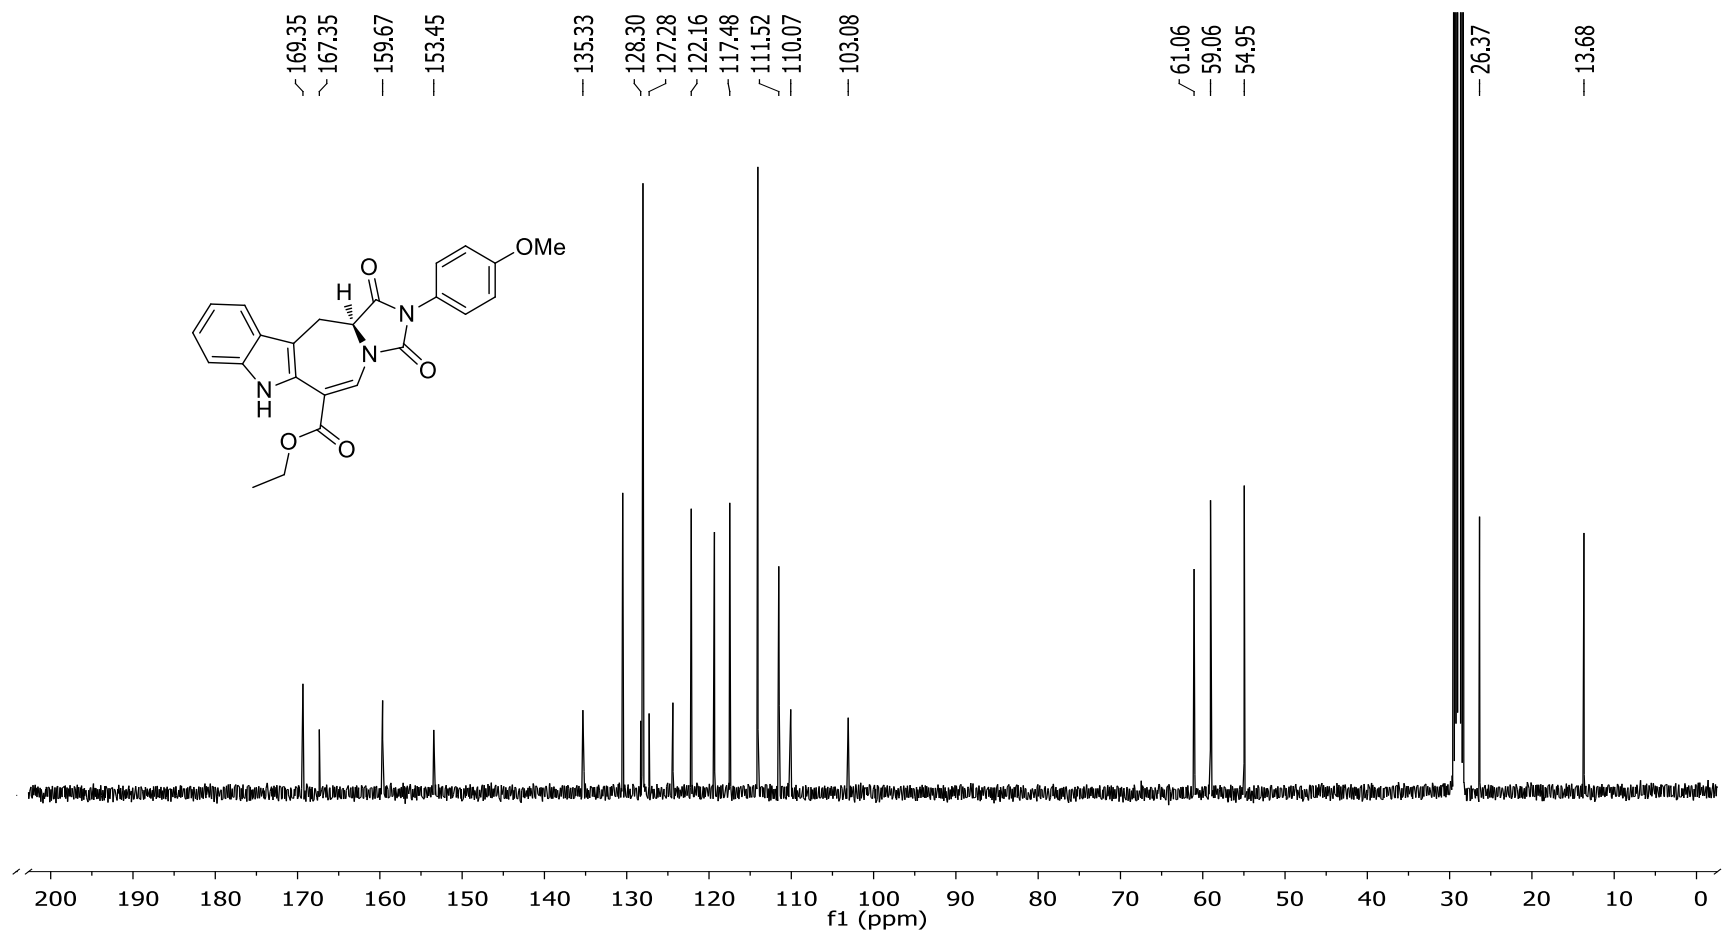

$^{13}\text{C}$  NMR spectrum (101 MHz) of compound **7p** in acetone- $\text{d}_6$



2014070910\_TT-LN2-023 #315 RT: 1.10 AV: 1 NL: 1.05E7  
T: {0,0} + c EI Full ms [50.00-900.00]

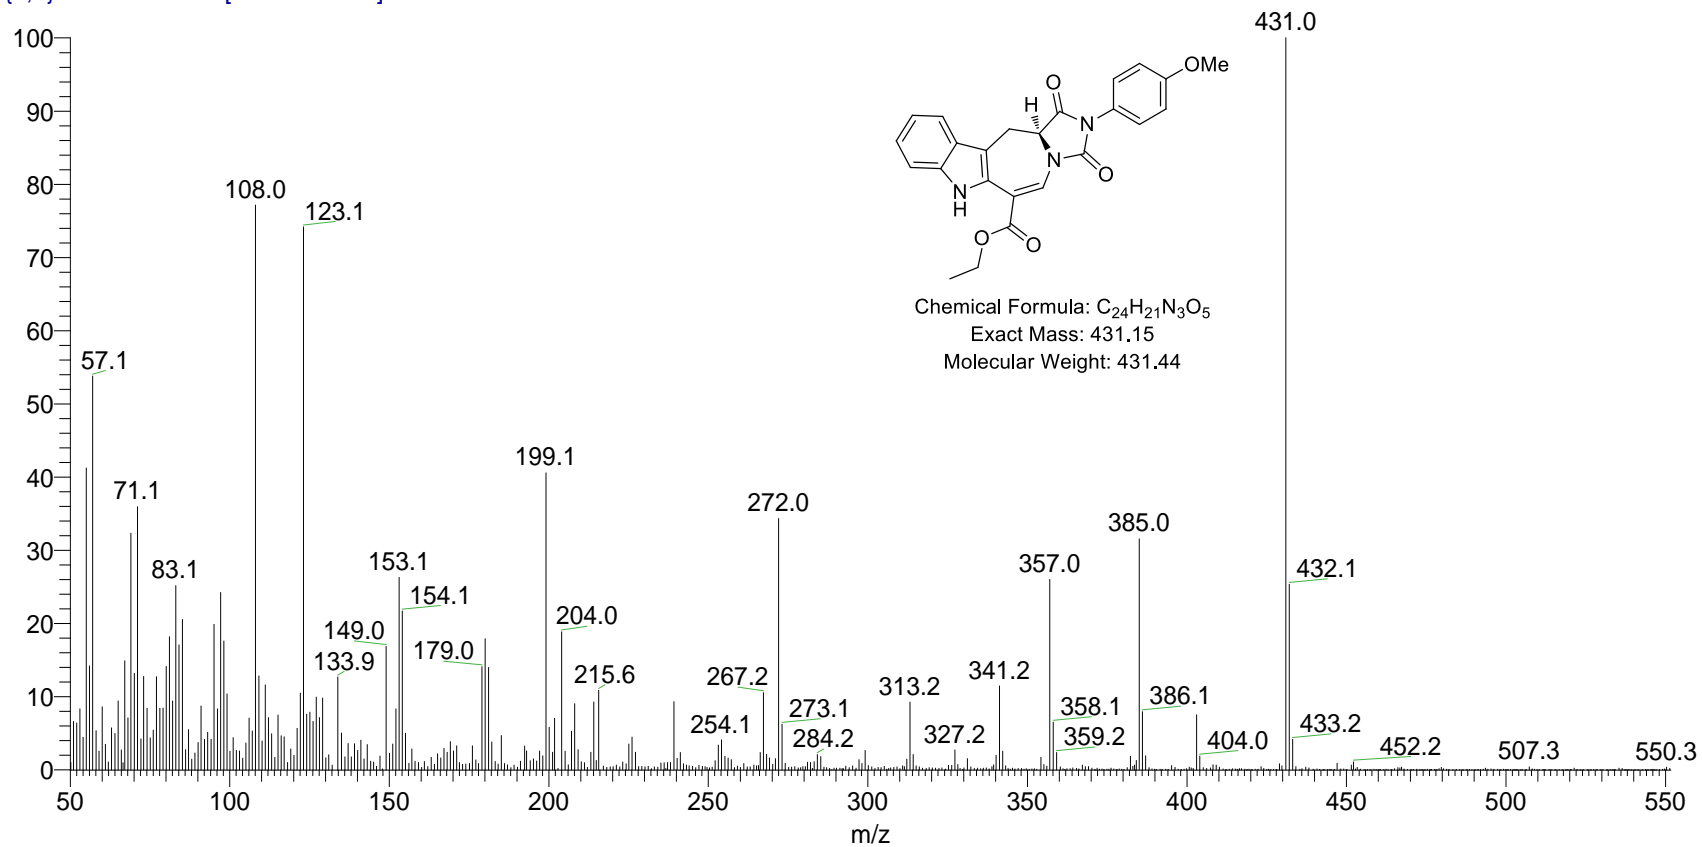

EI-LRMS of compound 7p

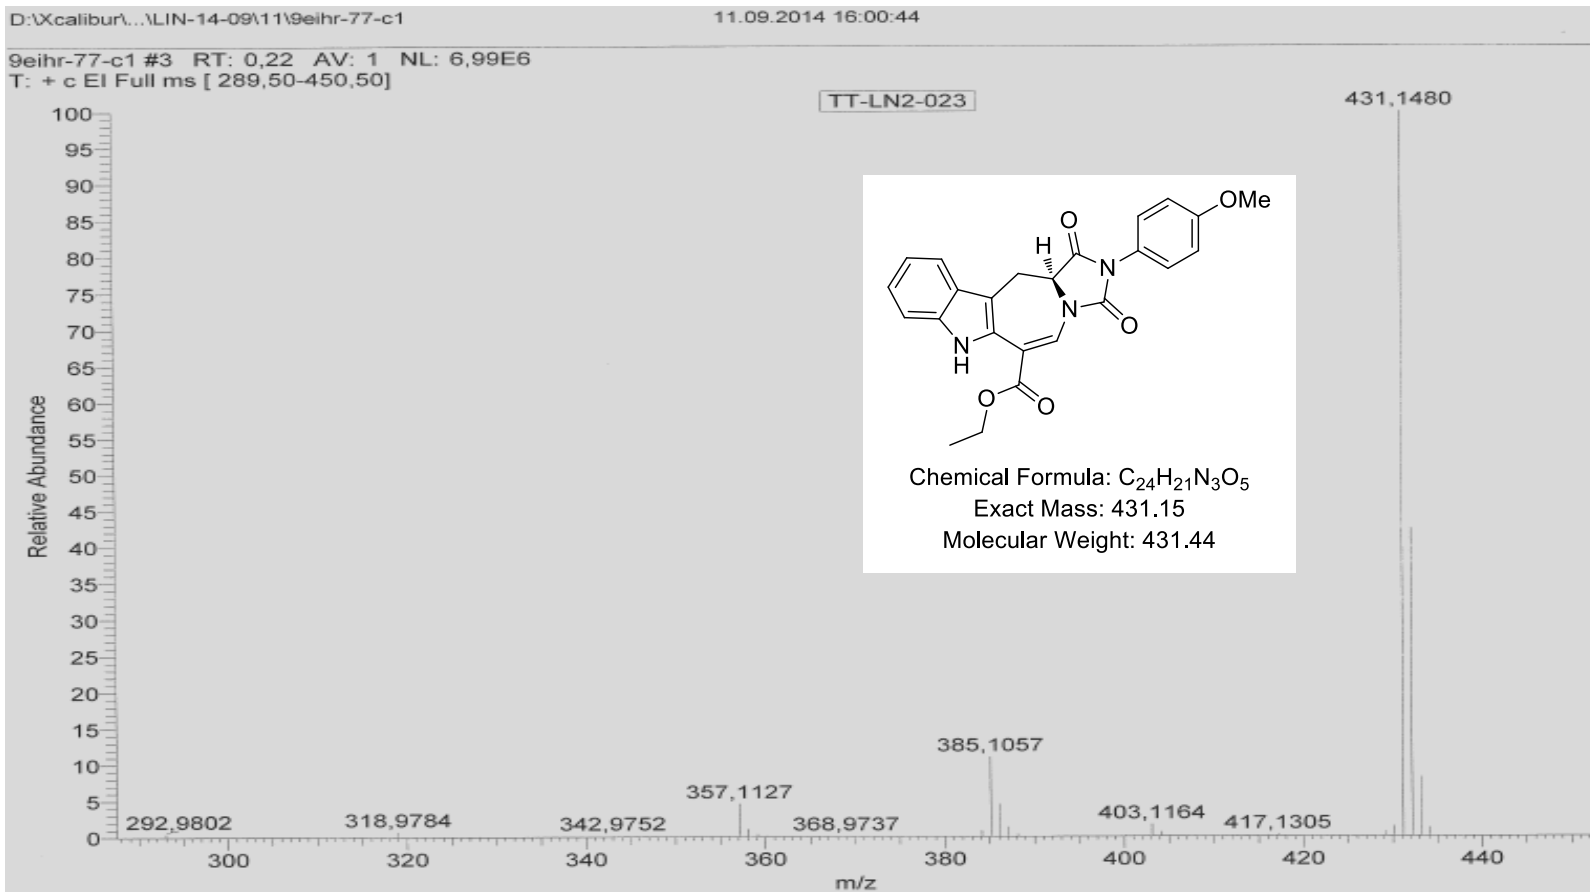

EI-HRMS of compound **7p**

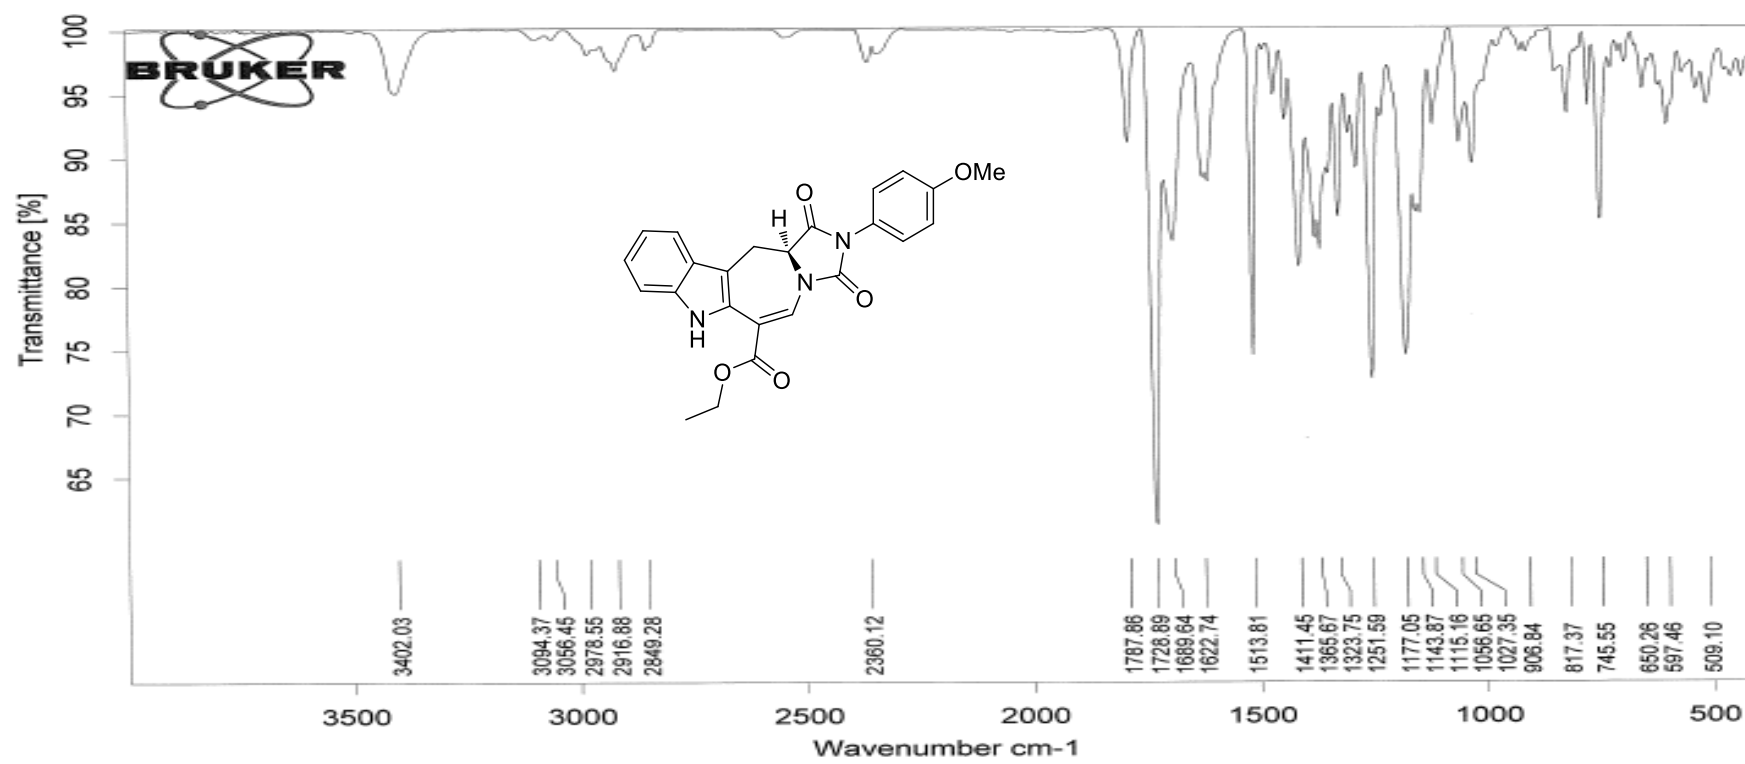

|                                                                      |                                  |                    |          |
|----------------------------------------------------------------------|----------------------------------|--------------------|----------|
| D:\temp-files\FTIR files\20140904\MIR_TR_DTGS_blank KBr_TT-LN2-023.0 | MIR_TR_DTGS_blank KBr_TT-LN2-023 | Instrument type an | 2014/9/4 |
|----------------------------------------------------------------------|----------------------------------|--------------------|----------|

IR spectrum of compound 7p

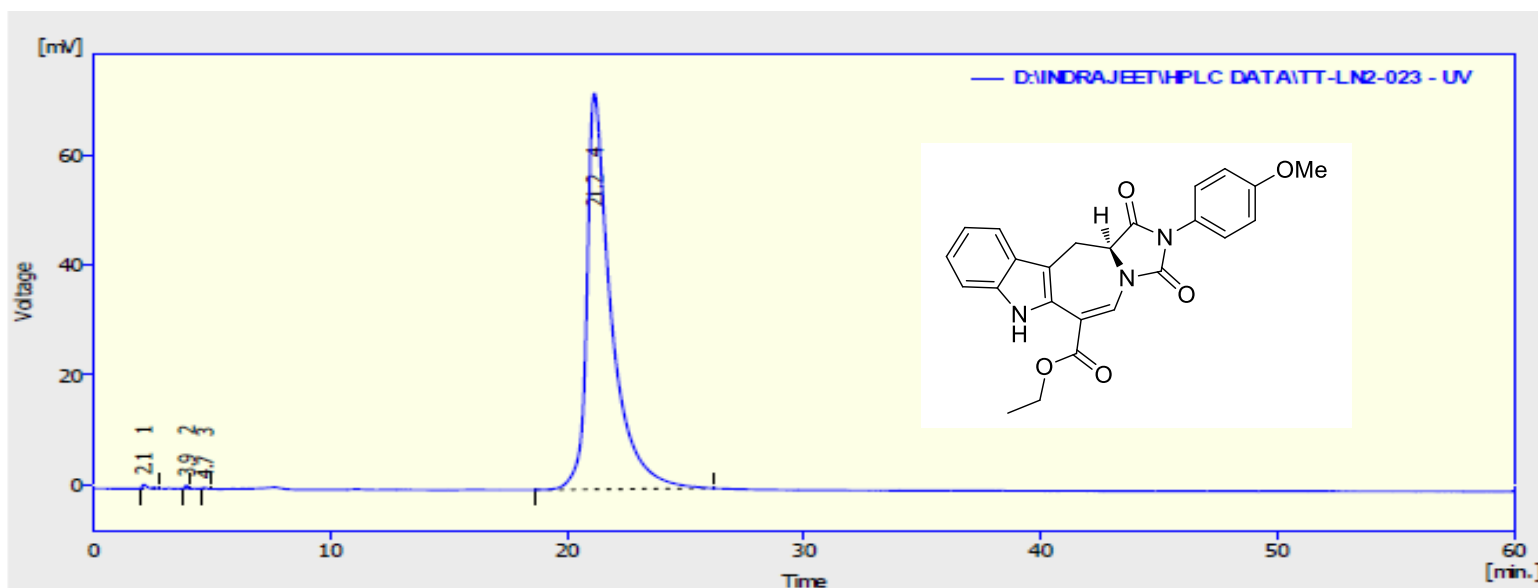

Result Table (Uncal - D:\INDRAJEET\HPLC DATA\TT-LN2-023 - UV)

|   | Reten. Time [min] | Area [mV.s] | Height [mV] | Area [%] | Height [%] |
|---|-------------------|-------------|-------------|----------|------------|
| 1 | 2.104             | 11.853      | 0.746       | 0.2      | 1.0        |
| 2 | 3.916             | 3.168       | 0.611       | 0.1      | 0.8        |
| 3 | 4.688             | 2.277       | 0.261       | 0.0      | 0.4        |
| 4 | 21.152            | 5146.503    | 72.047      | 99.7     | 97.8       |
|   | Total             | 5163.802    | 73.665      | 100.0    | 100.0      |

HPLC of compound 7p

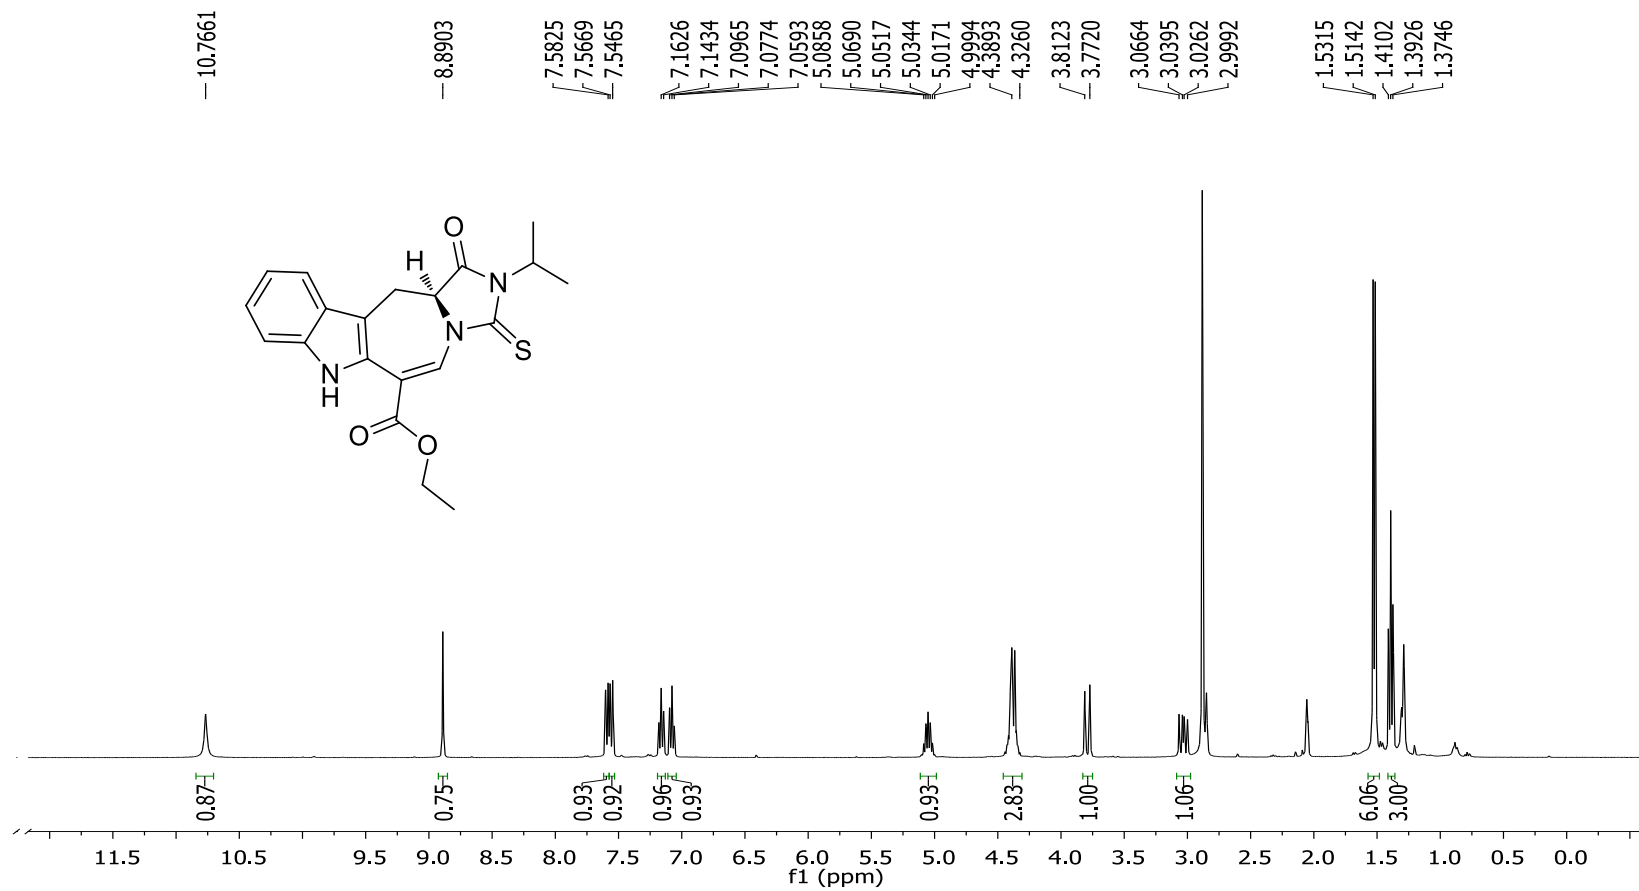

<sup>1</sup>H NMR spectrum (400 MHz) of compound **7q** in acetone-d<sub>6</sub>

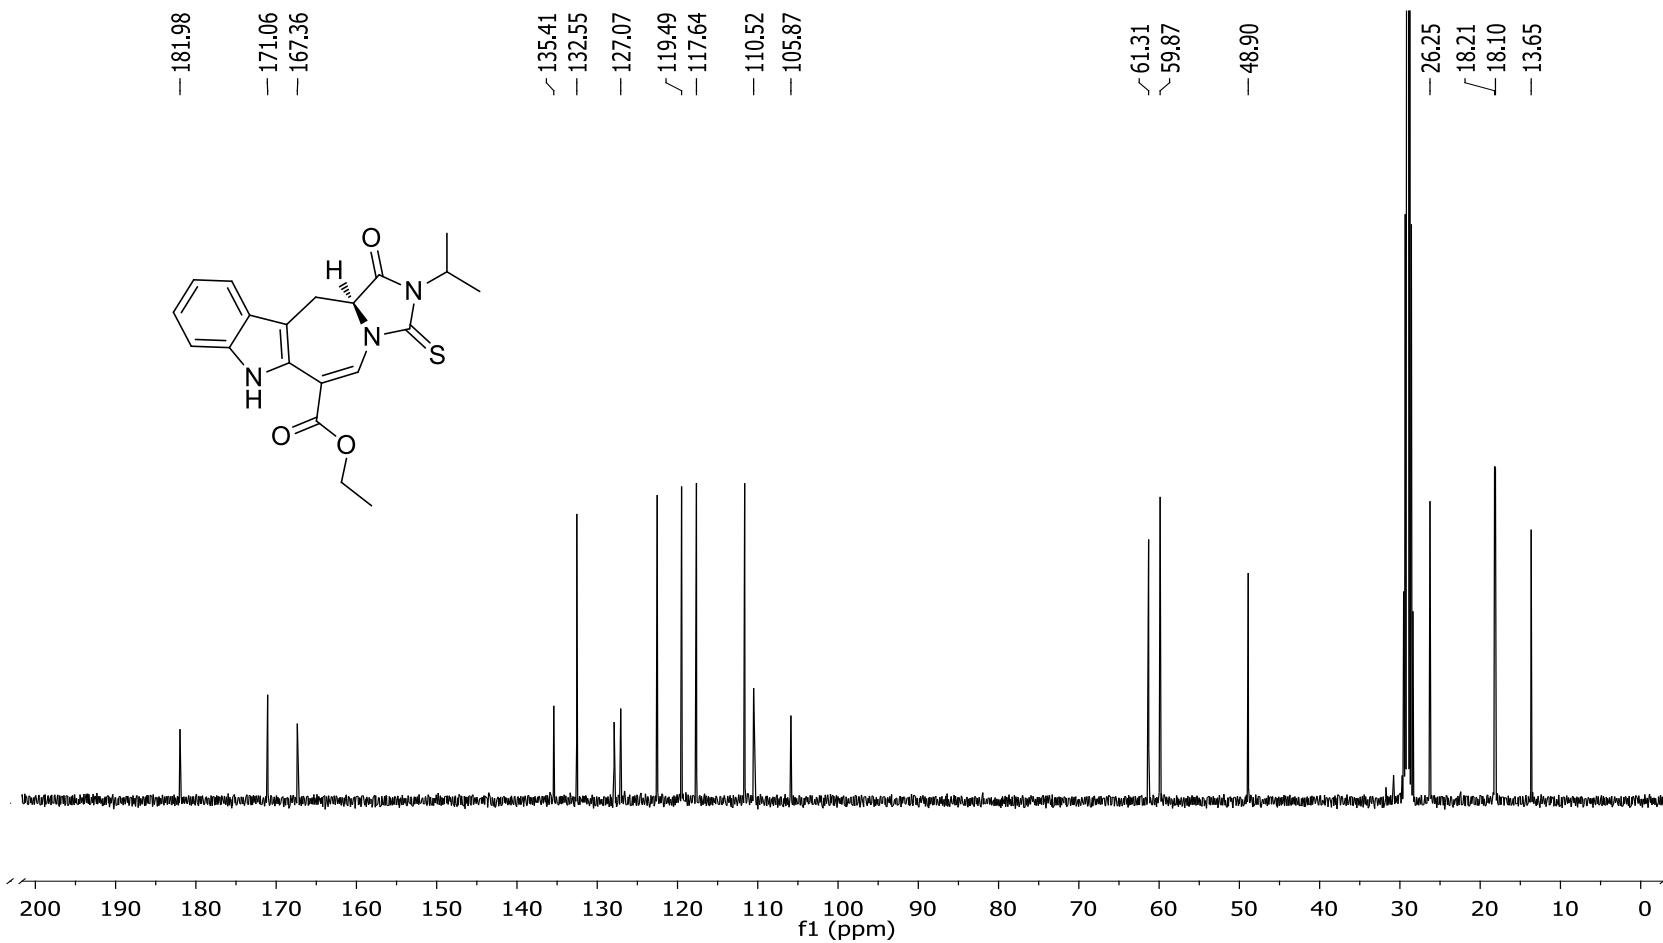

<sup>13</sup>C NMR spectrum (101 MHz) of compound **7q** in acetone-d<sub>6</sub>

2014080815\_TT-LN2-044 #308 RT: 1.08 AV: 1 NL: 3.36E7  
T: {0,0} + c EI Full ms [50.00-1050.00]

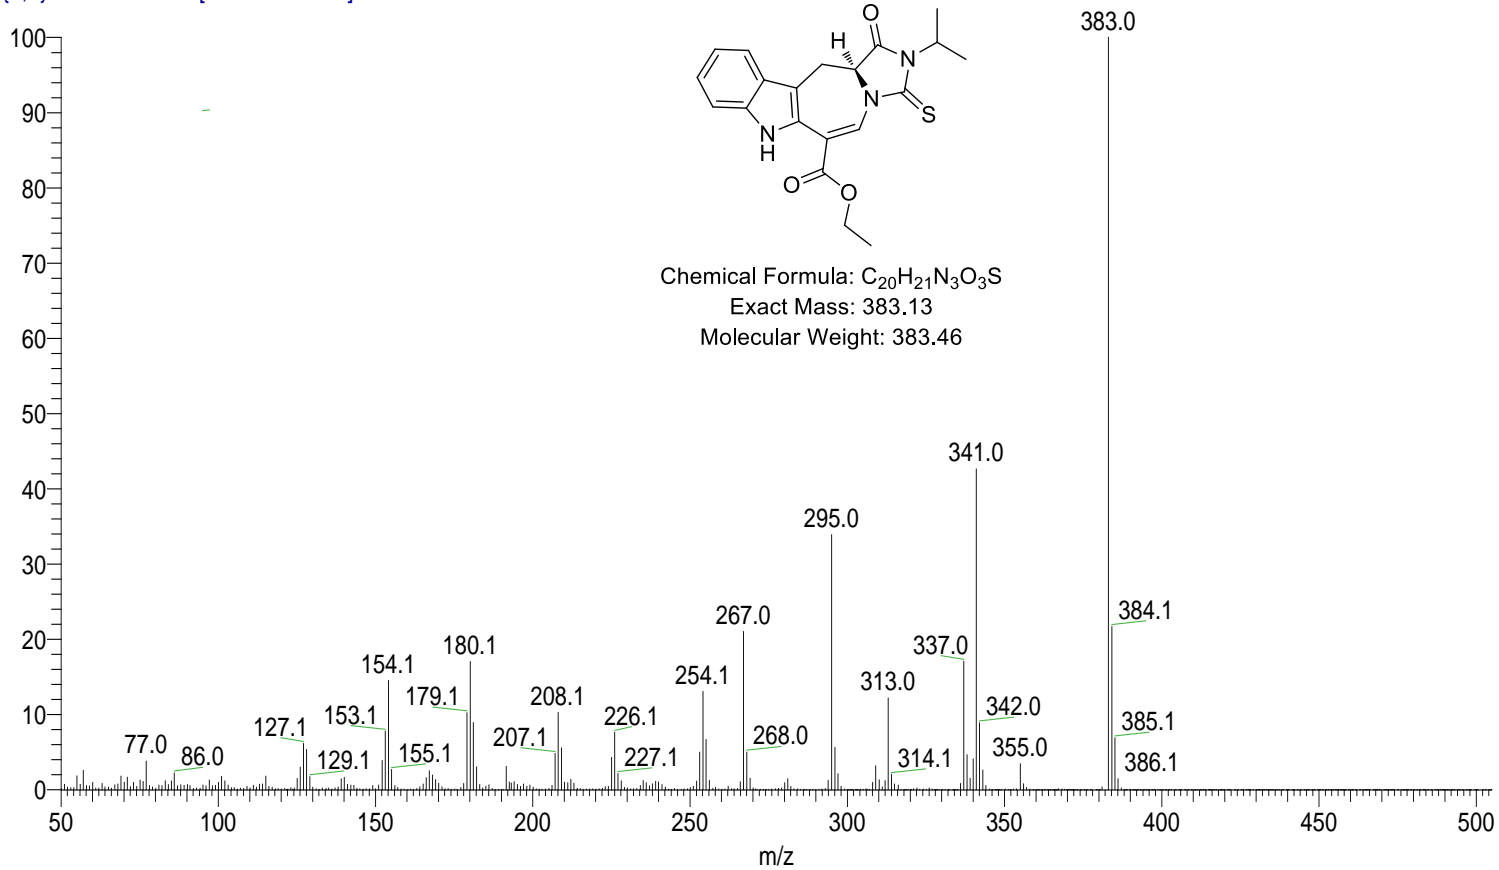

EI-LRMS of compound **7q**

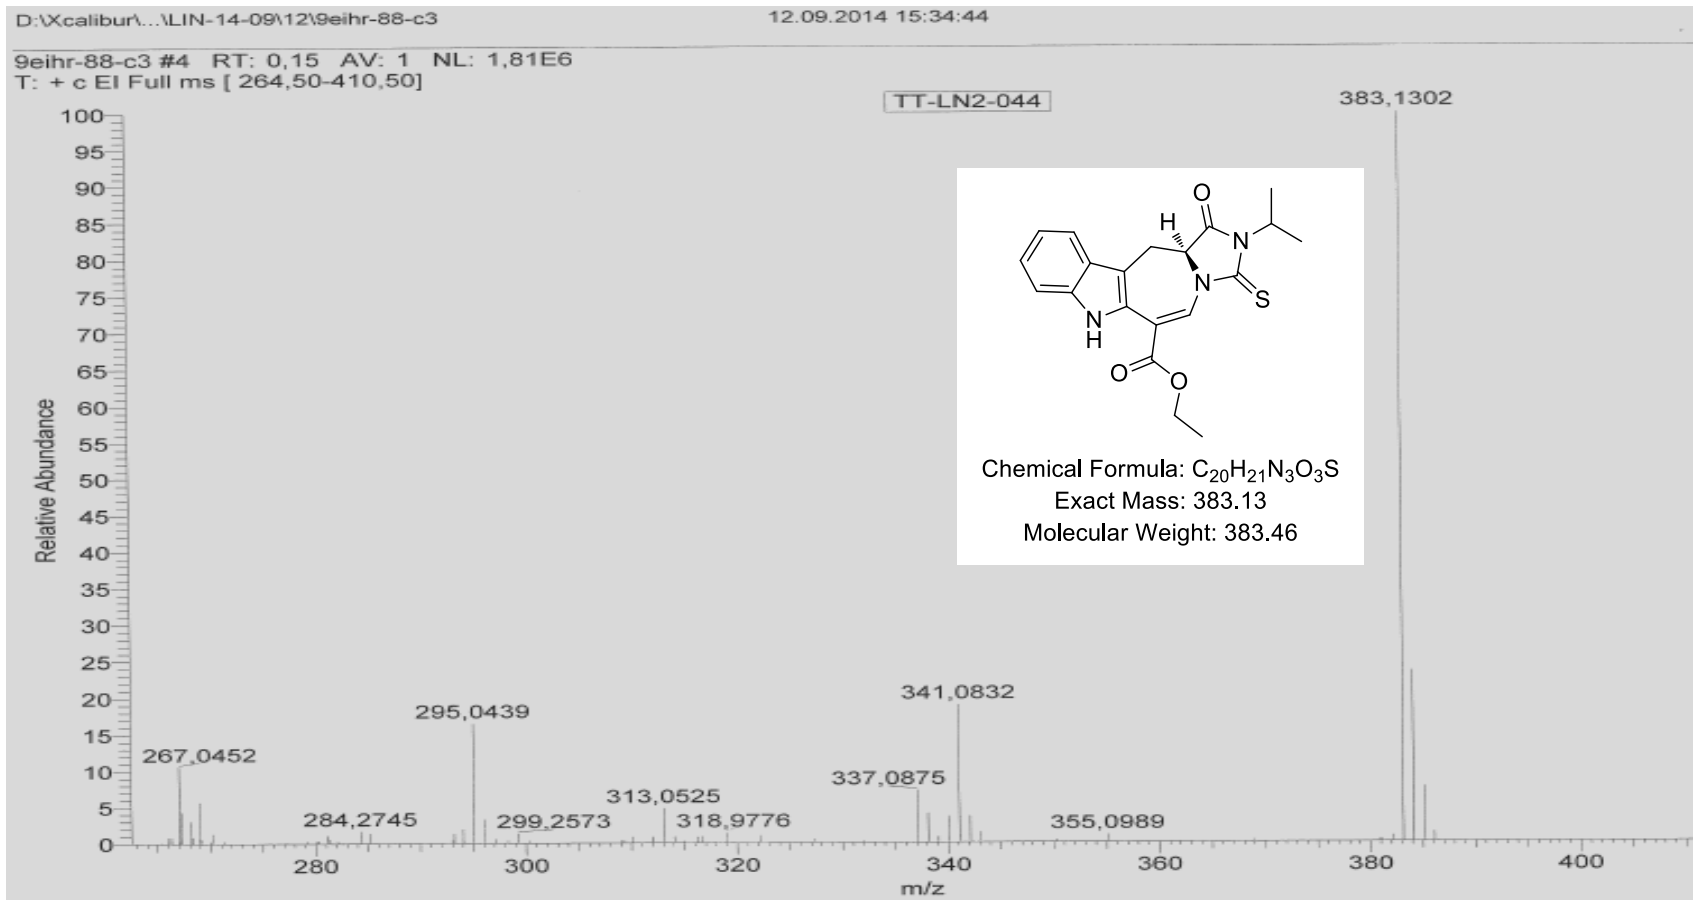

EI-HRMS of compound **7q**



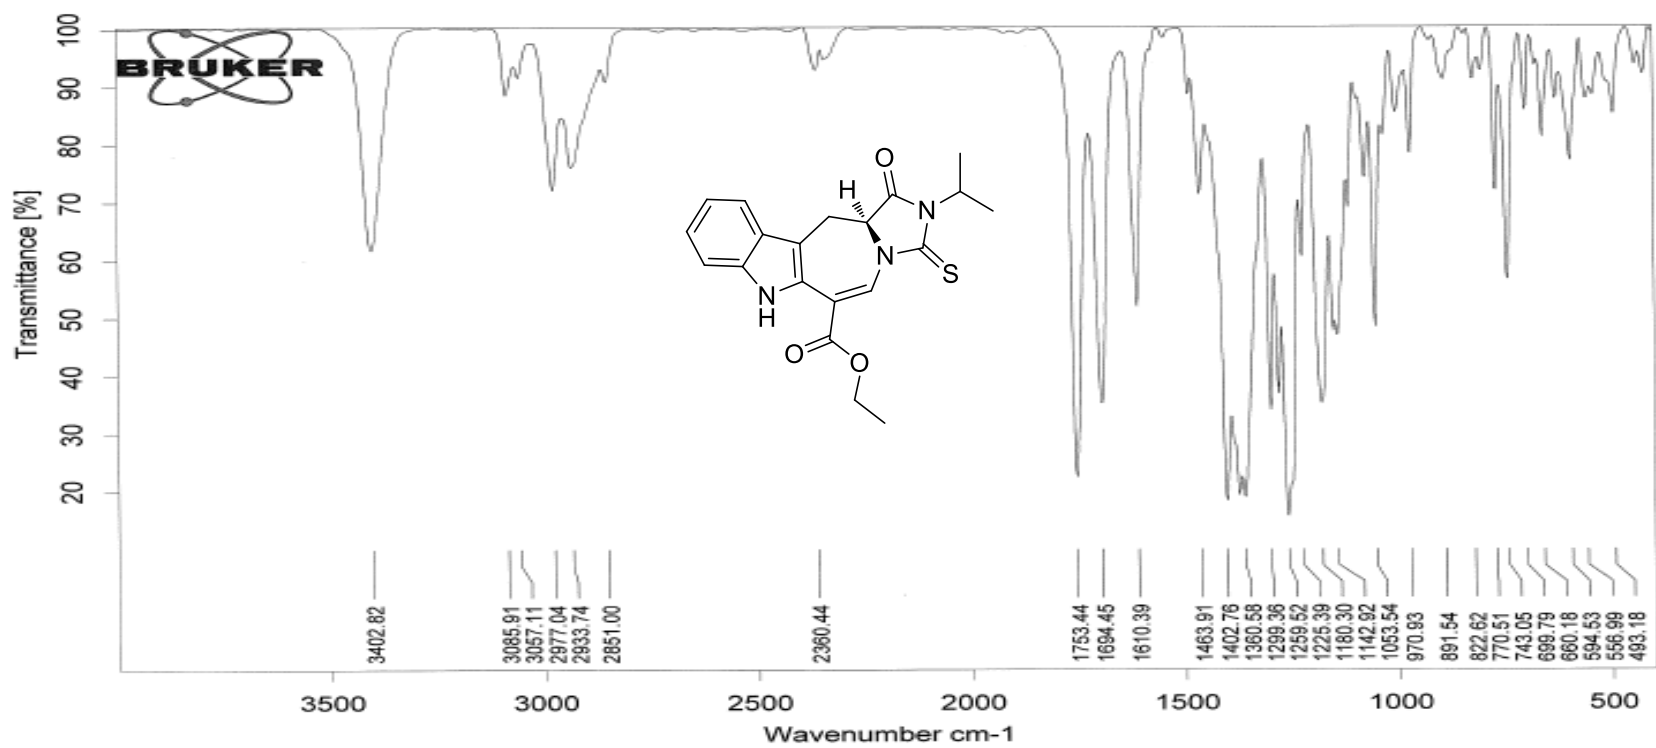

|                                                                      |                                  |                    |          |
|----------------------------------------------------------------------|----------------------------------|--------------------|----------|
| D:\temp-files\FTIR files\20140904\MIR_TR_DTGS_blank KBr_TT-LN2-044.0 | MIR_TR_DTGS_blank KBr_TT-LN2-044 | Instrument type an | 2014/9/4 |
|----------------------------------------------------------------------|----------------------------------|--------------------|----------|

IR spectrum of compound 7q

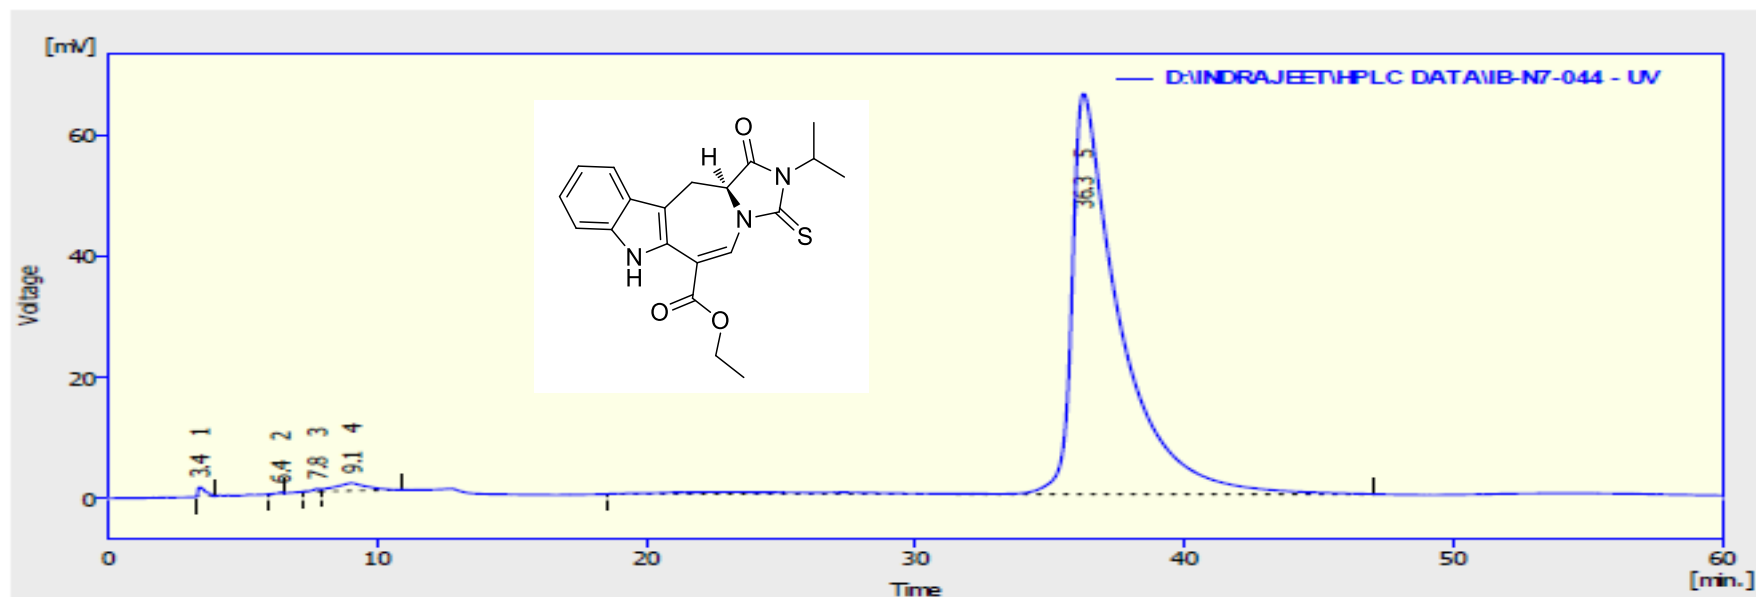

Result Table (Uncal - D:\INDRAJEET\HPLC DATA\IB-N7-044 - UV)

|   | Reten. Time [min] | Area [mV.s] | Height [mV] | Area [%] | Height [%] |
|---|-------------------|-------------|-------------|----------|------------|
| 1 | 3.384             | 30.977      | 1.569       | 0.4      | 2.2        |
| 2 | 6.416             | 2.841       | 0.246       | 0.0      | 0.4        |
| 3 | 7.752             | 7.524       | 0.442       | 0.1      | 0.6        |
| 4 | 9.052             | 106.477     | 1.290       | 1.3      | 1.8        |
| 5 | 36.264            | 8301.639    | 66.248      | 98.3     | 94.9       |
|   | Total             | 8449.459    | 69.795      | 100.0    | 100.0      |

HPLC of compound 7q

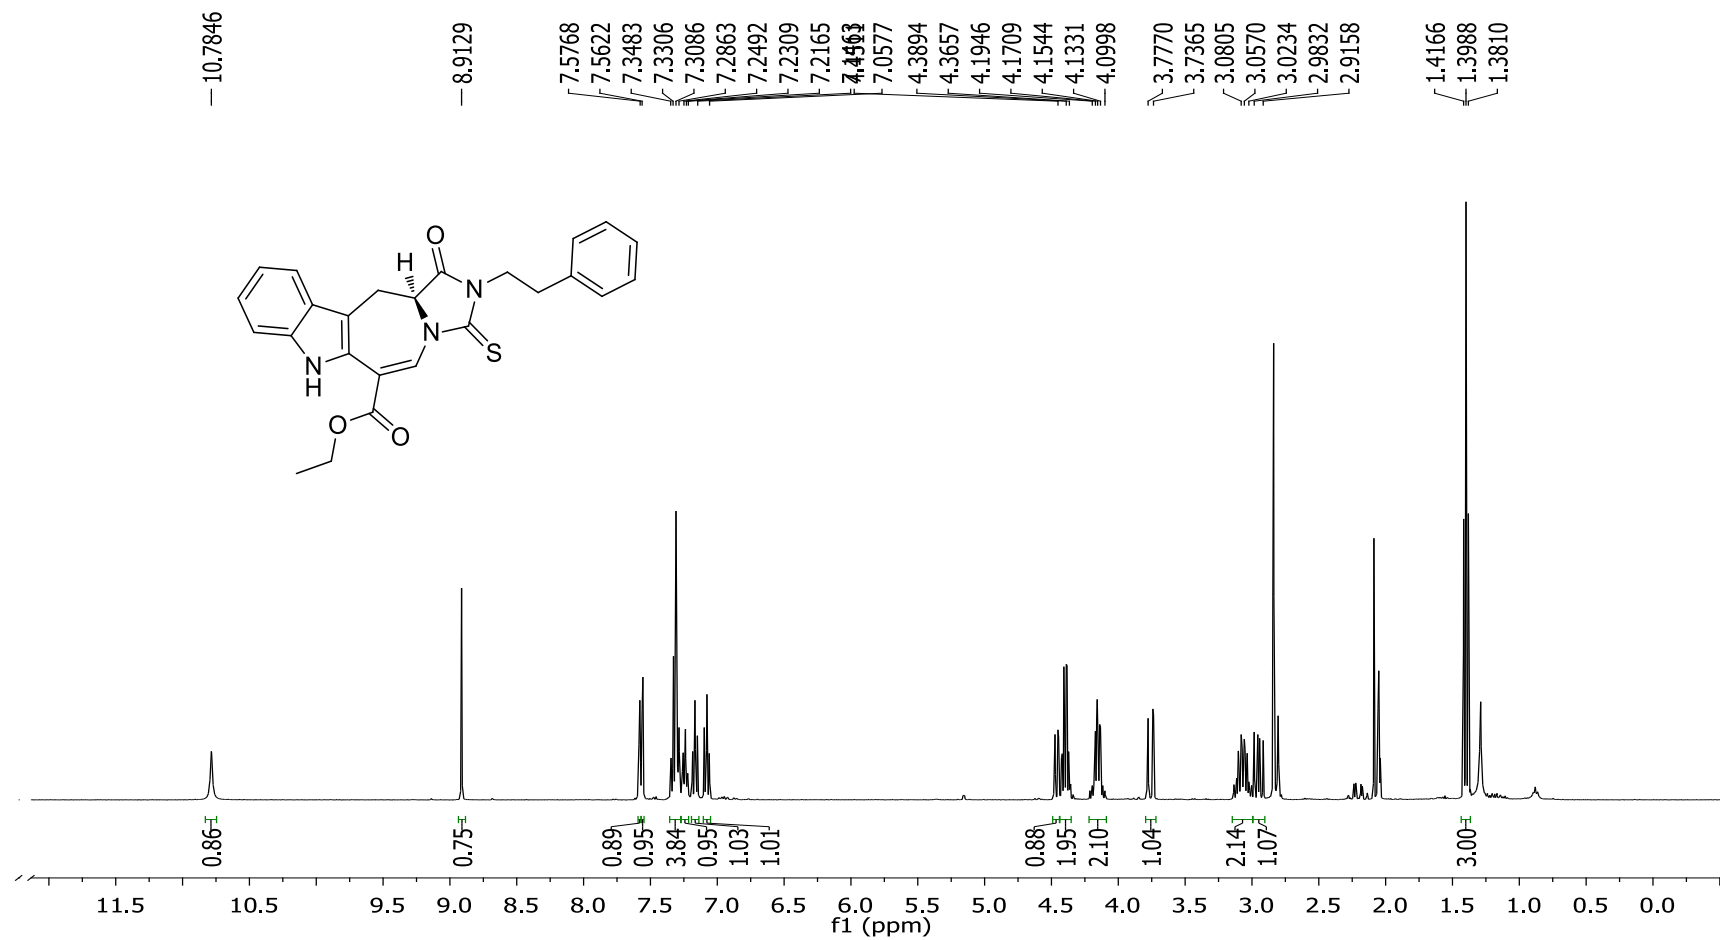

<sup>1</sup>H NMR spectrum (400 MHz) of compound **7r** in acetone-d<sub>6</sub>

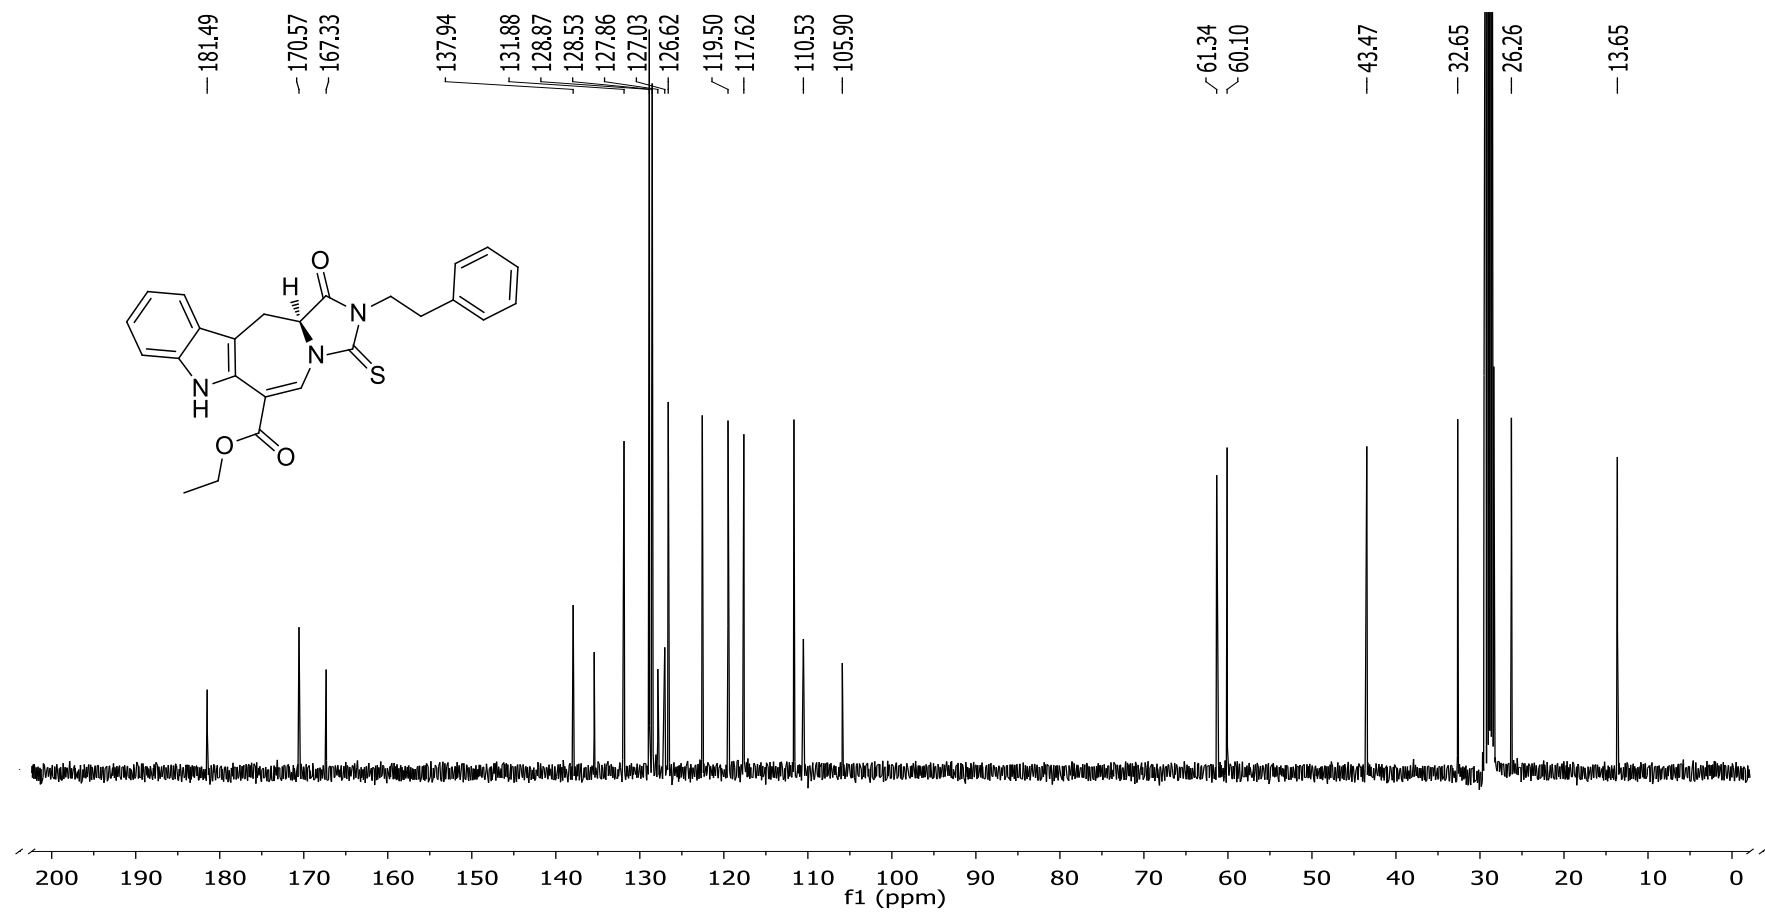

<sup>13</sup>C NMR spectrum (101 MHz) of compound **7r** in acetone-d<sub>6</sub>

2014080816\_ib-N7-076 #409 RT: 1.42 AV: 1 NL: 5.81E7  
T: {0,0} + c EI Full ms [50.00-900.00]

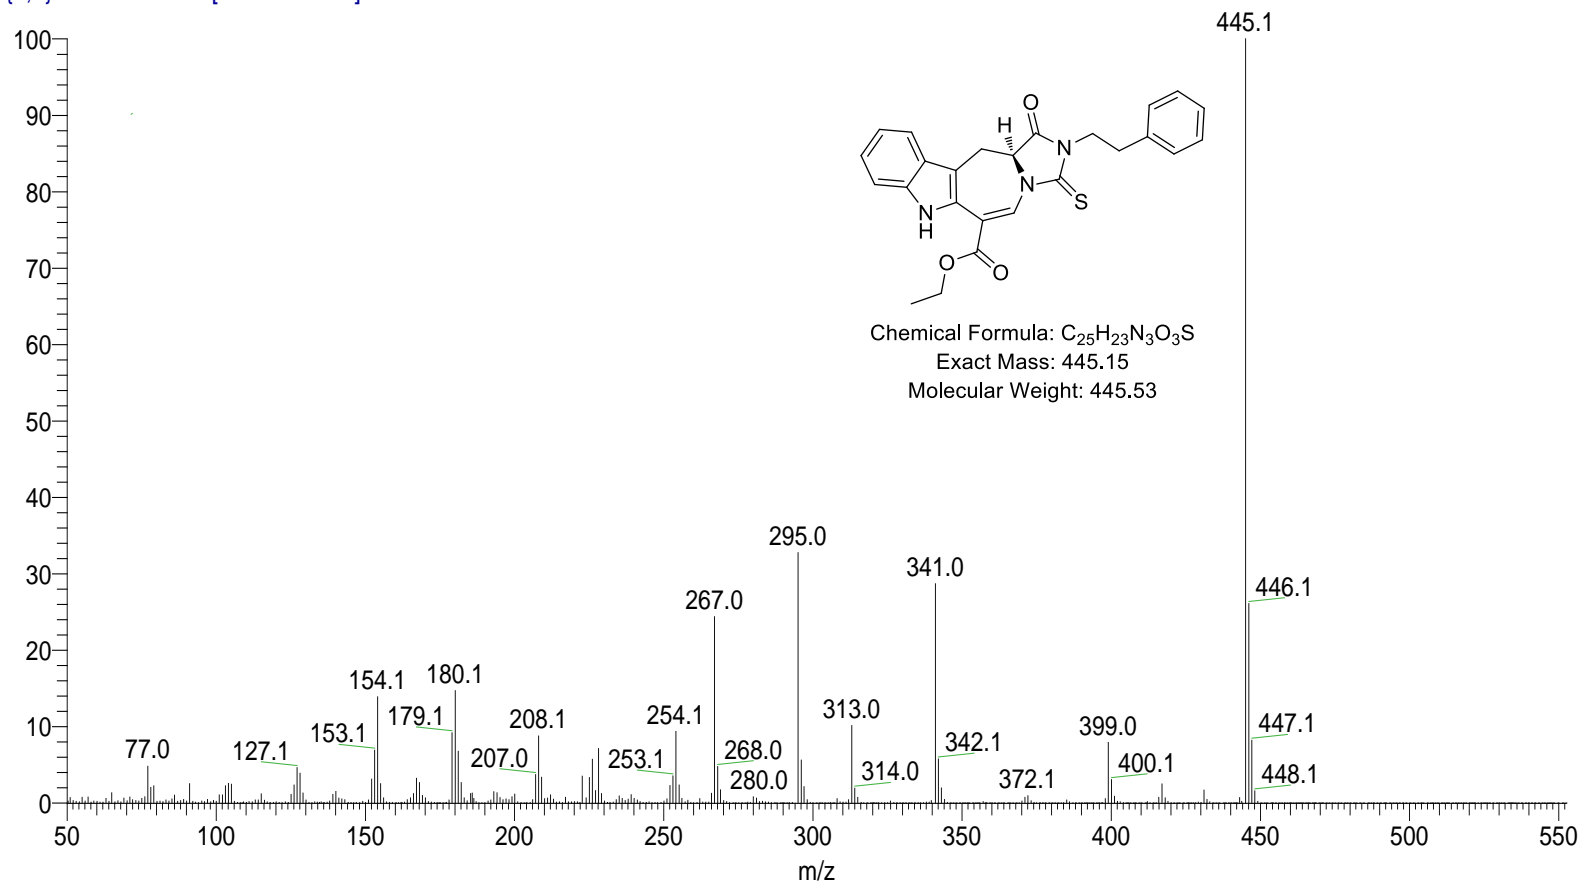

EI-LRMS of compound **7r**

9eihr-74-c3 #4 RT: 0,39 AV: 1 NL: 4,79E7

T: + c EI Full ms [ 319,50-485,50]

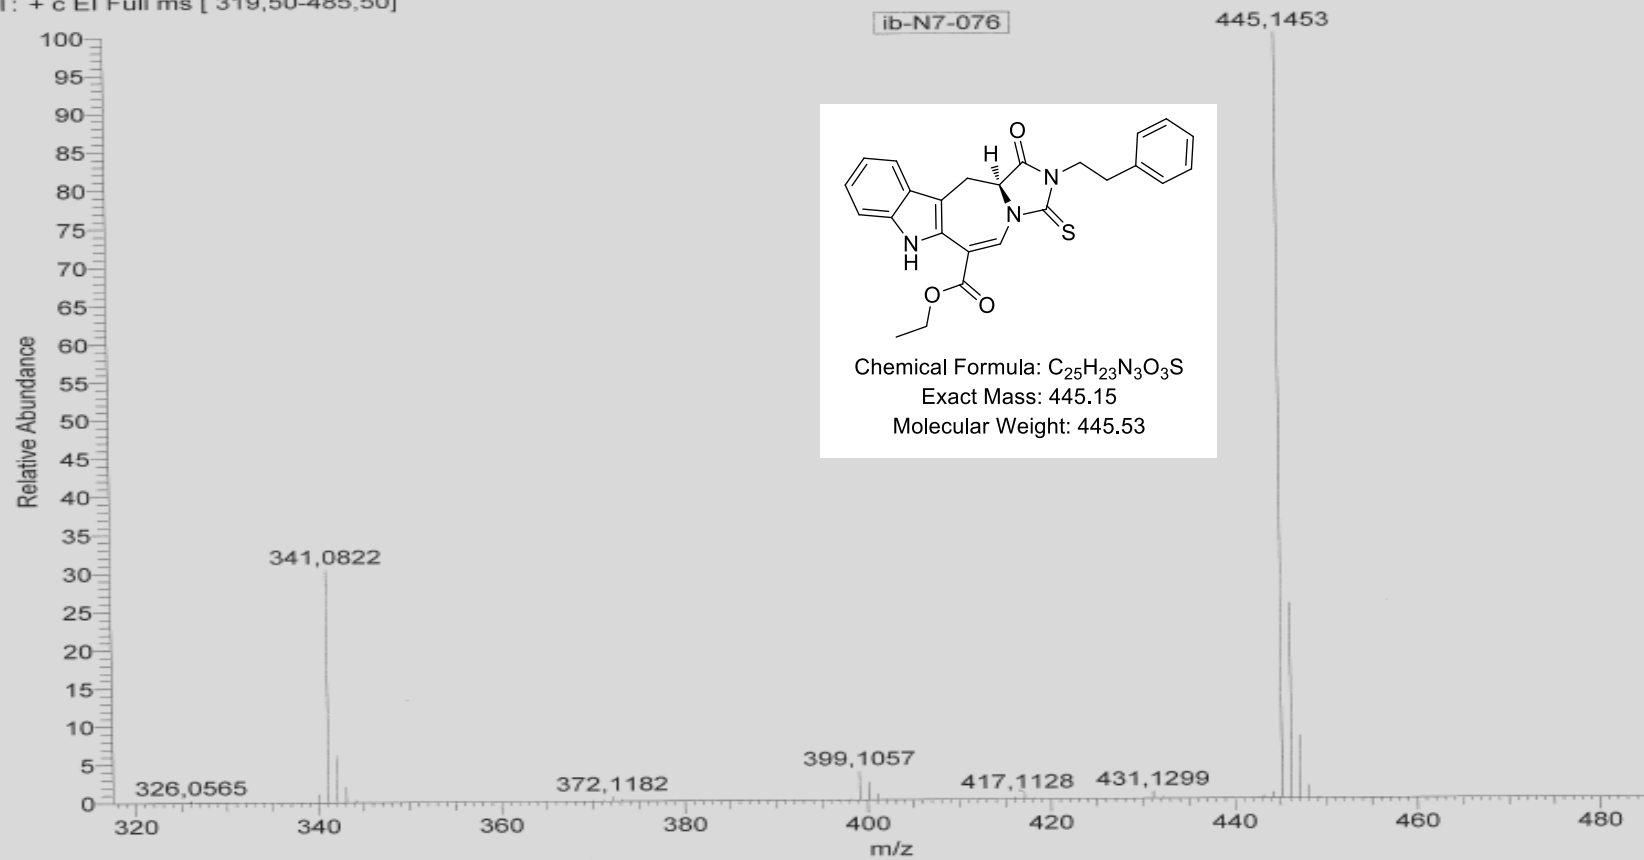EI-HRMS of compound **7r**

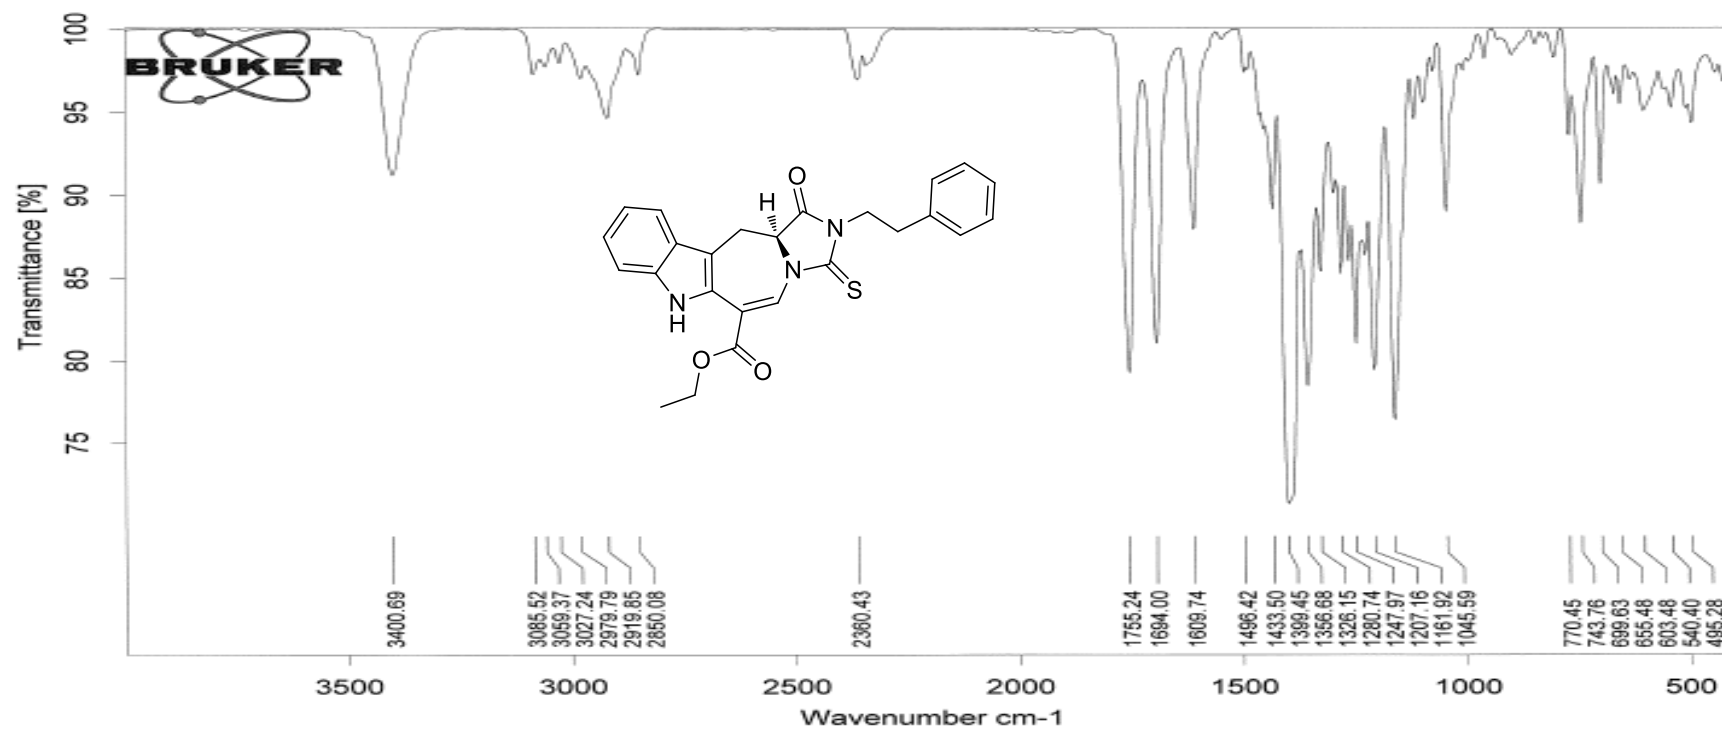

|                                                                     |                                 |                         |          |
|---------------------------------------------------------------------|---------------------------------|-------------------------|----------|
| D:\temp-files\FTIR files\20140904\MIR_TR_DTGS_blank KBr_ib-N7-076.0 | MIR_TR_DTGS_blank KBr_ib-N7-076 | Instrument type and / o | 2014/9/4 |
|---------------------------------------------------------------------|---------------------------------|-------------------------|----------|

IR spectrum of compound 7r

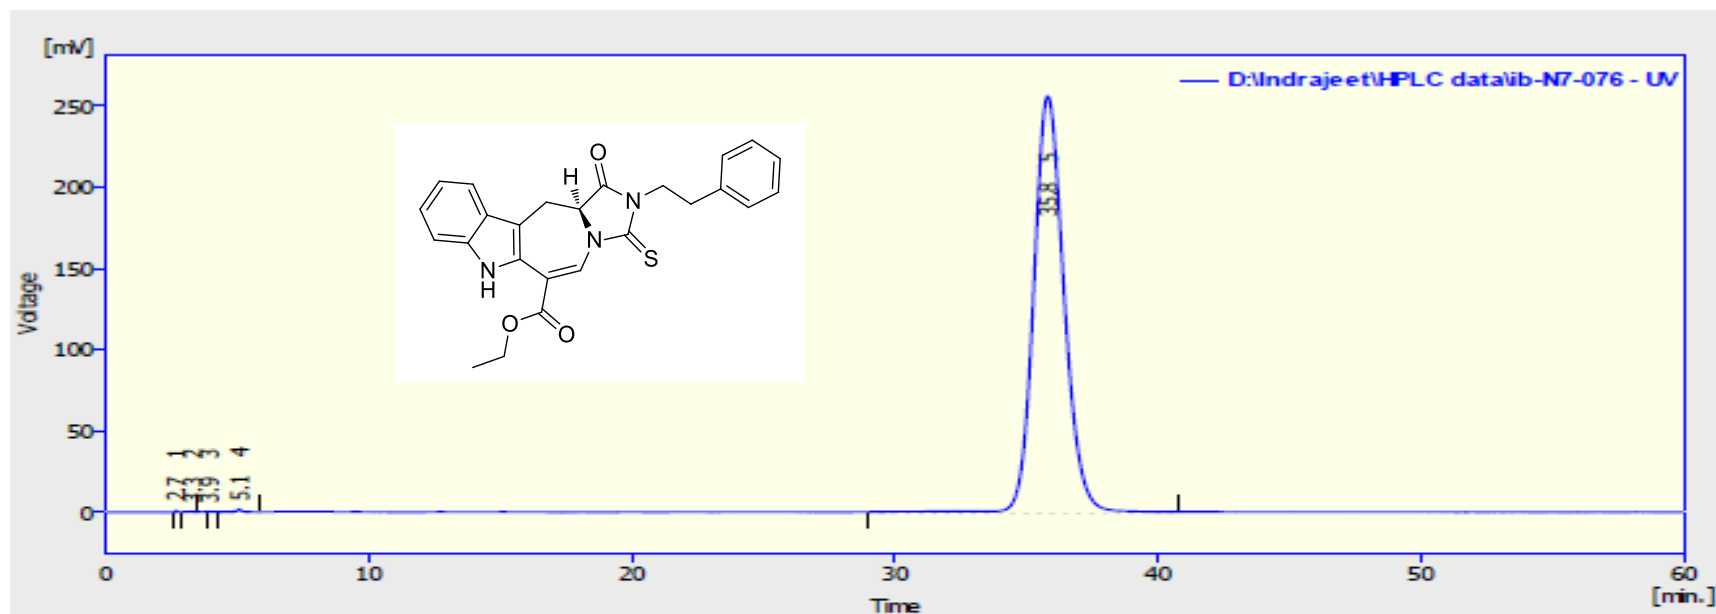

Result Table (Uncal - D:\Indrajeet\HPLC data\ib-N7-076 - UV)

|   | Reten. Time [min] | Area [mV.s] | Height [mV] | Area [%] | Height [%] |
|---|-------------------|-------------|-------------|----------|------------|
| 1 | 2.676             | 5.060       | 0.857       | 0.0      | 0.3        |
| 2 | 3.296             | 3.716       | 0.362       | 0.0      | 0.1        |
| 3 | 3.912             | 1.814       | 0.291       | 0.0      | 0.1        |
| 4 | 5.076             | 25.238      | 1.707       | 0.1      | 0.7        |
| 5 | 35.816            | 20359.697   | 255.846     | 99.8     | 98.8       |
|   | Total             | 20395.525   | 259.061     | 100.0    | 100.0      |

HPLC of compound 7r



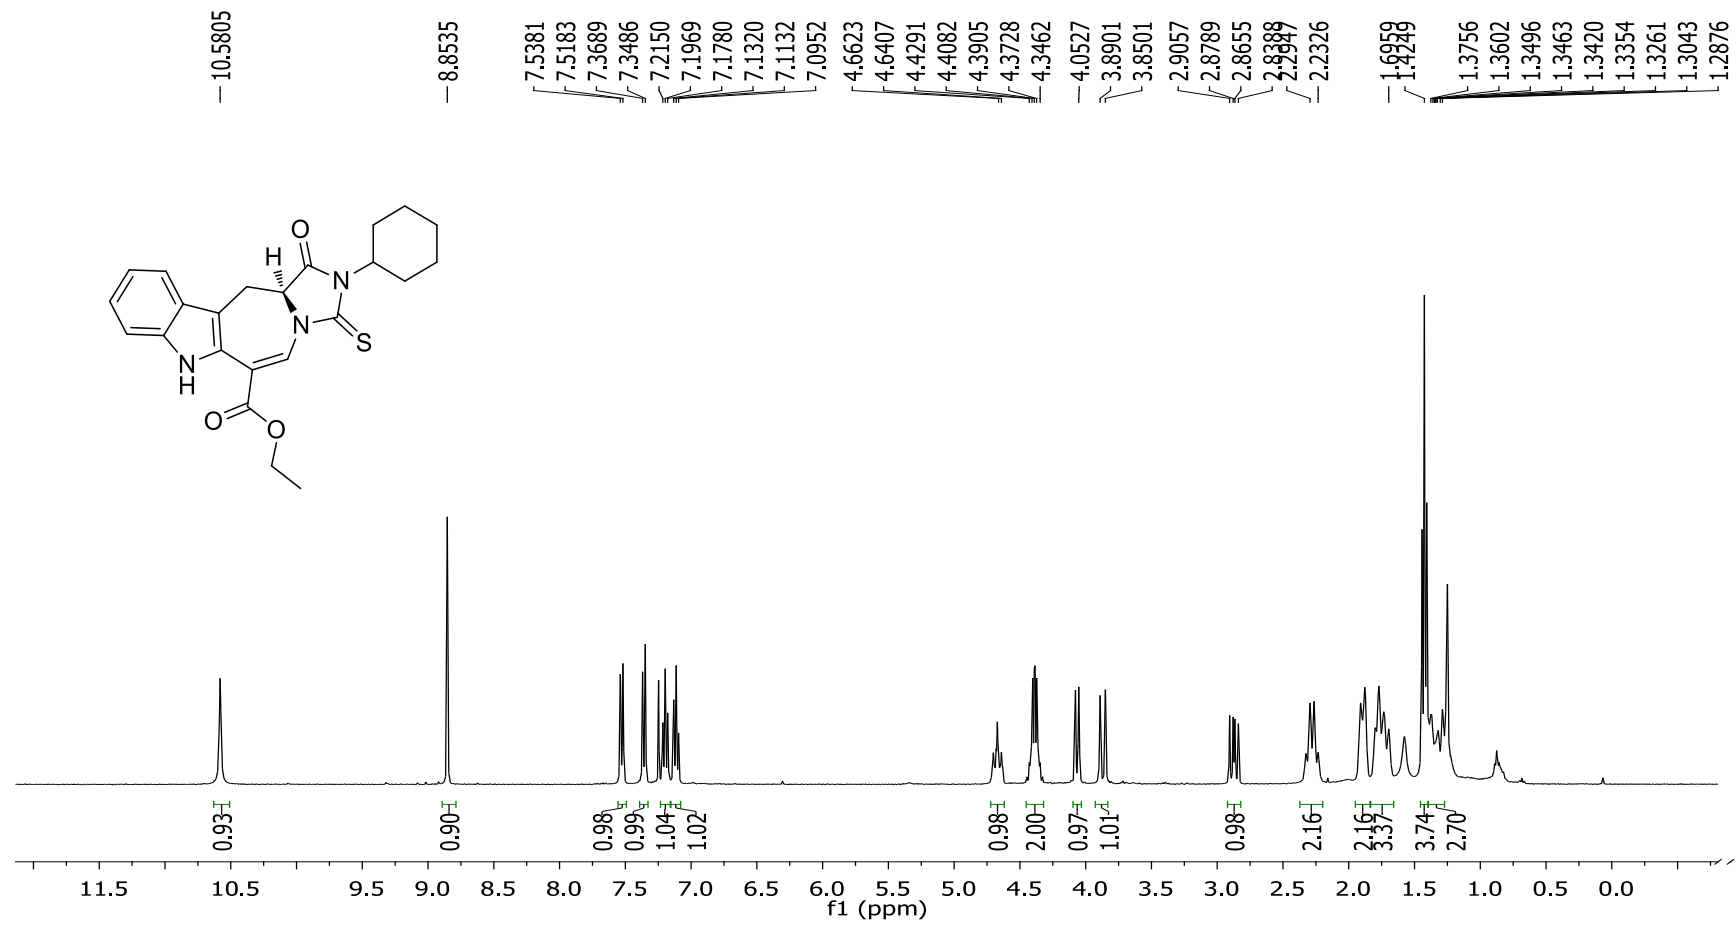

<sup>1</sup>H NMR spectrum (400 MHz) of compound 7s in CDCl<sub>3</sub>

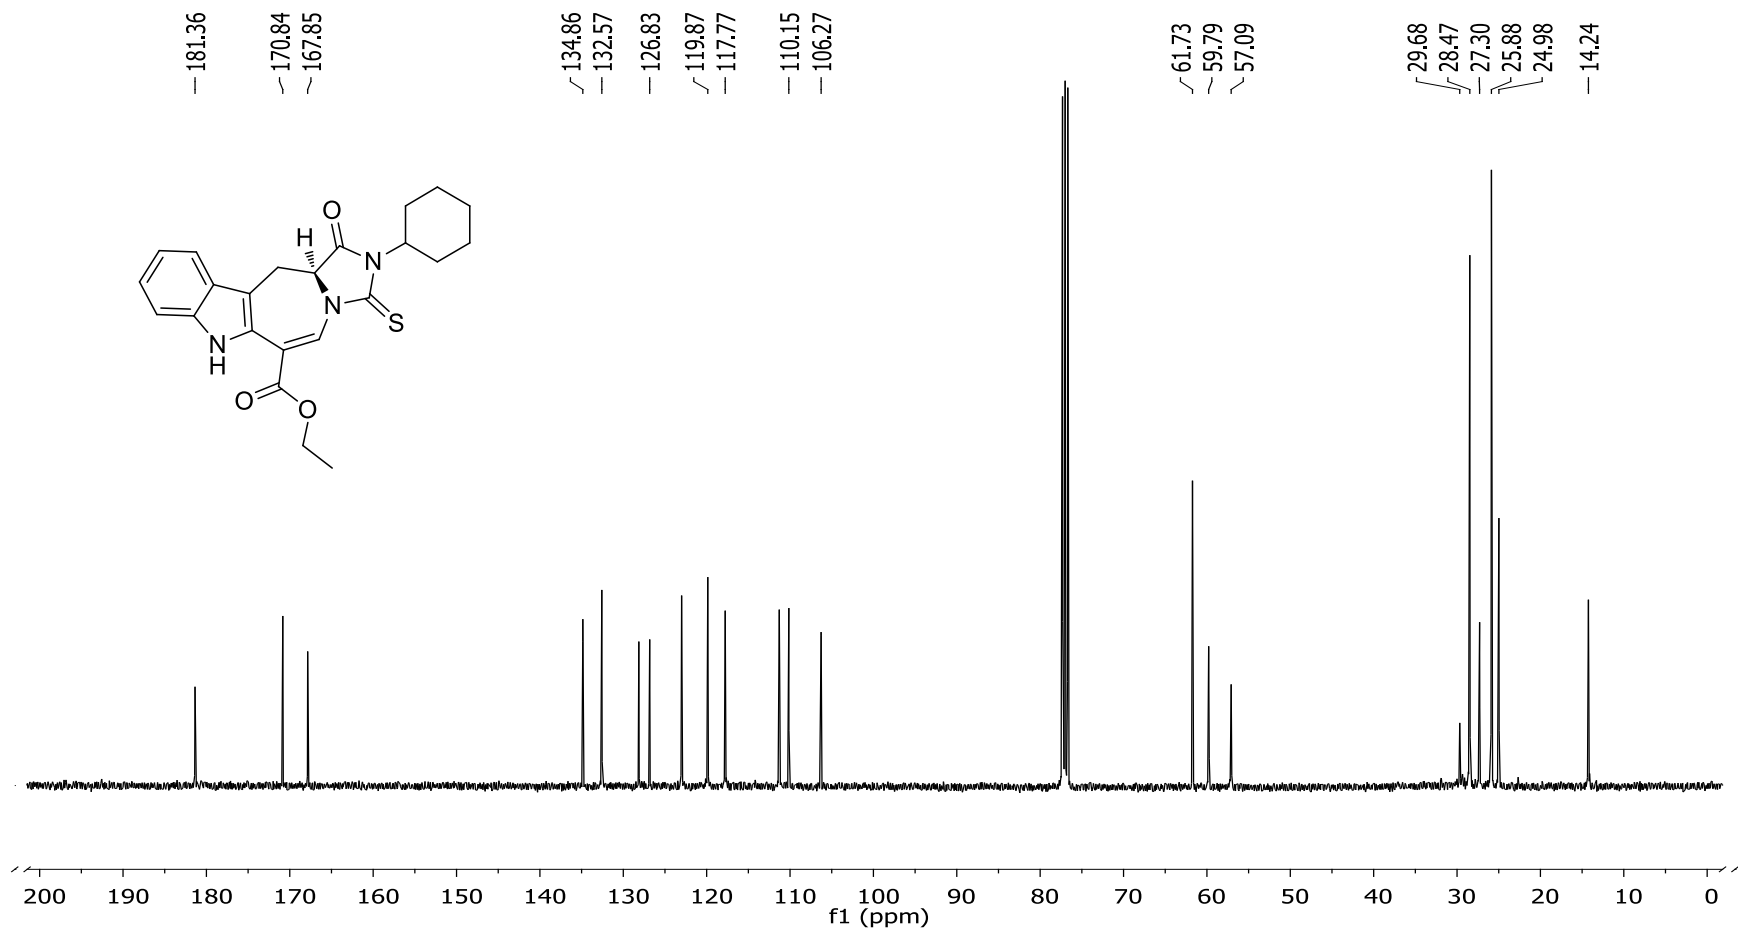

<sup>13</sup>C NMR spectrum (101 MHz) of compound **7s** in CDCl<sub>3</sub>

2014070912\_TT-LN1-079 #304 RT: 1.06 AV: 1 NL: 8.04E7  
T: {0,0} + c EI Full ms [50.00-900.00]

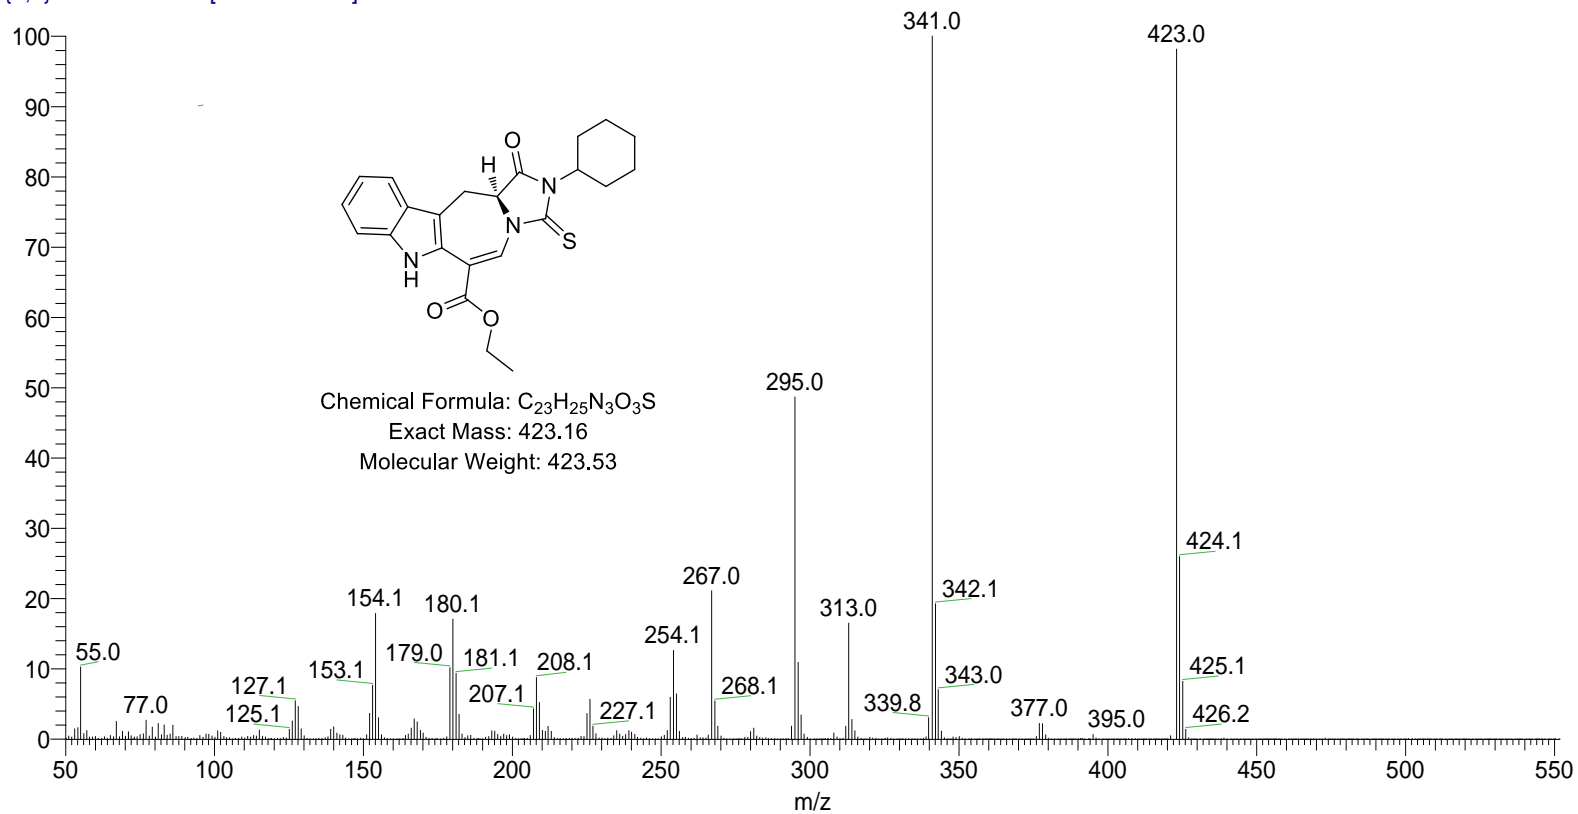

EI-LRMS of compound 7s

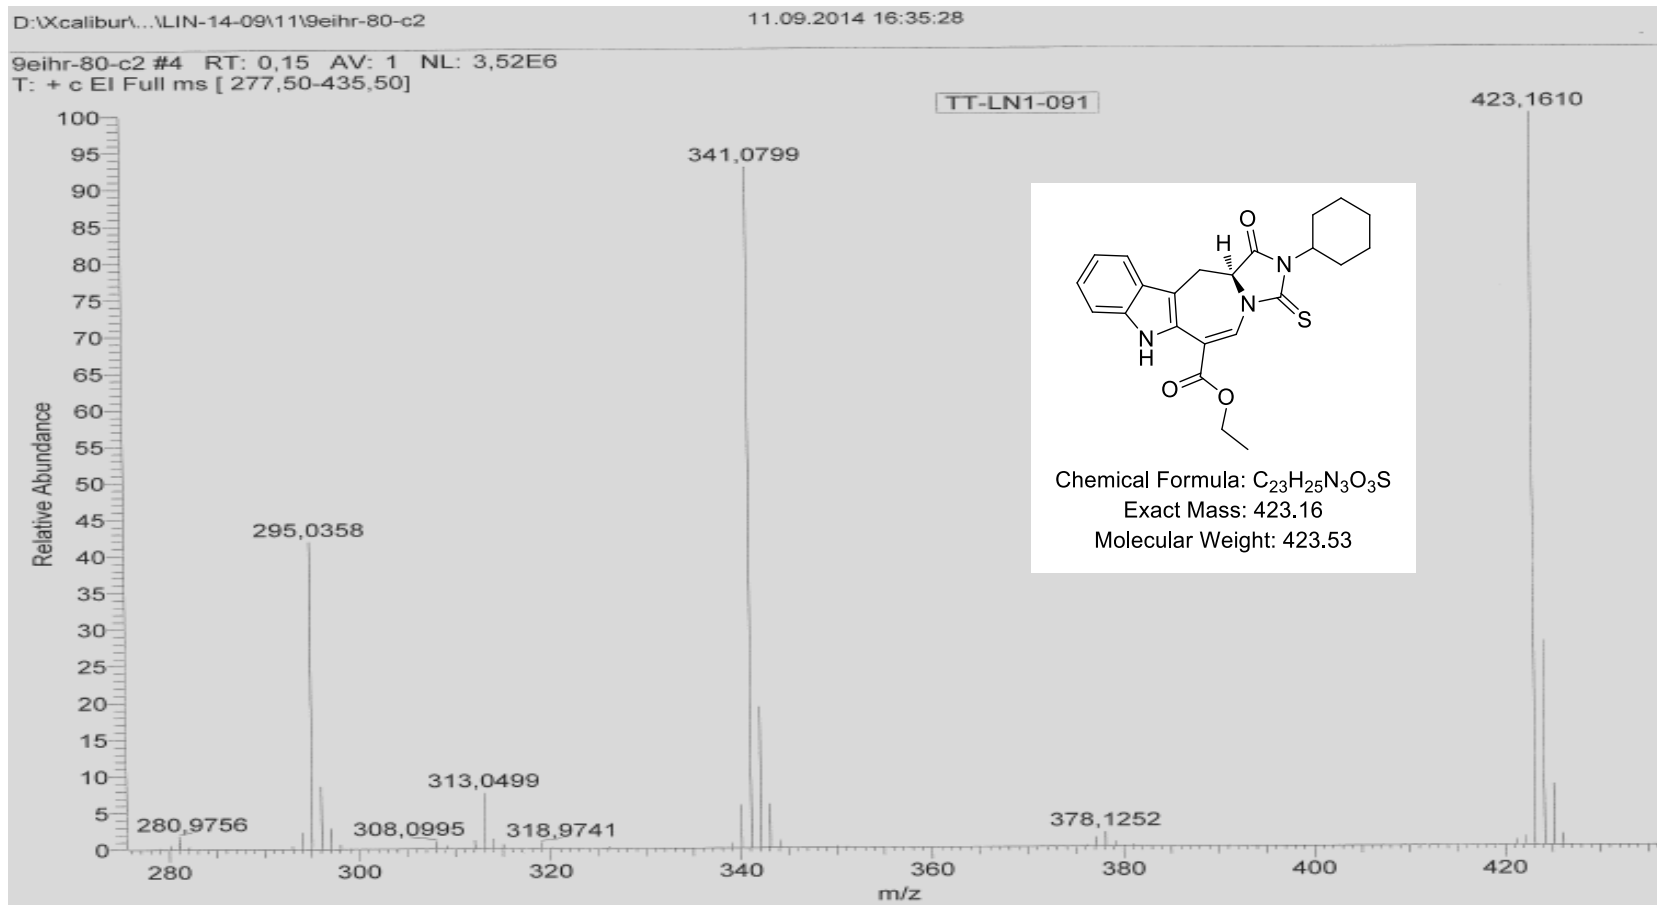

EI-HRMS of compound **7s**

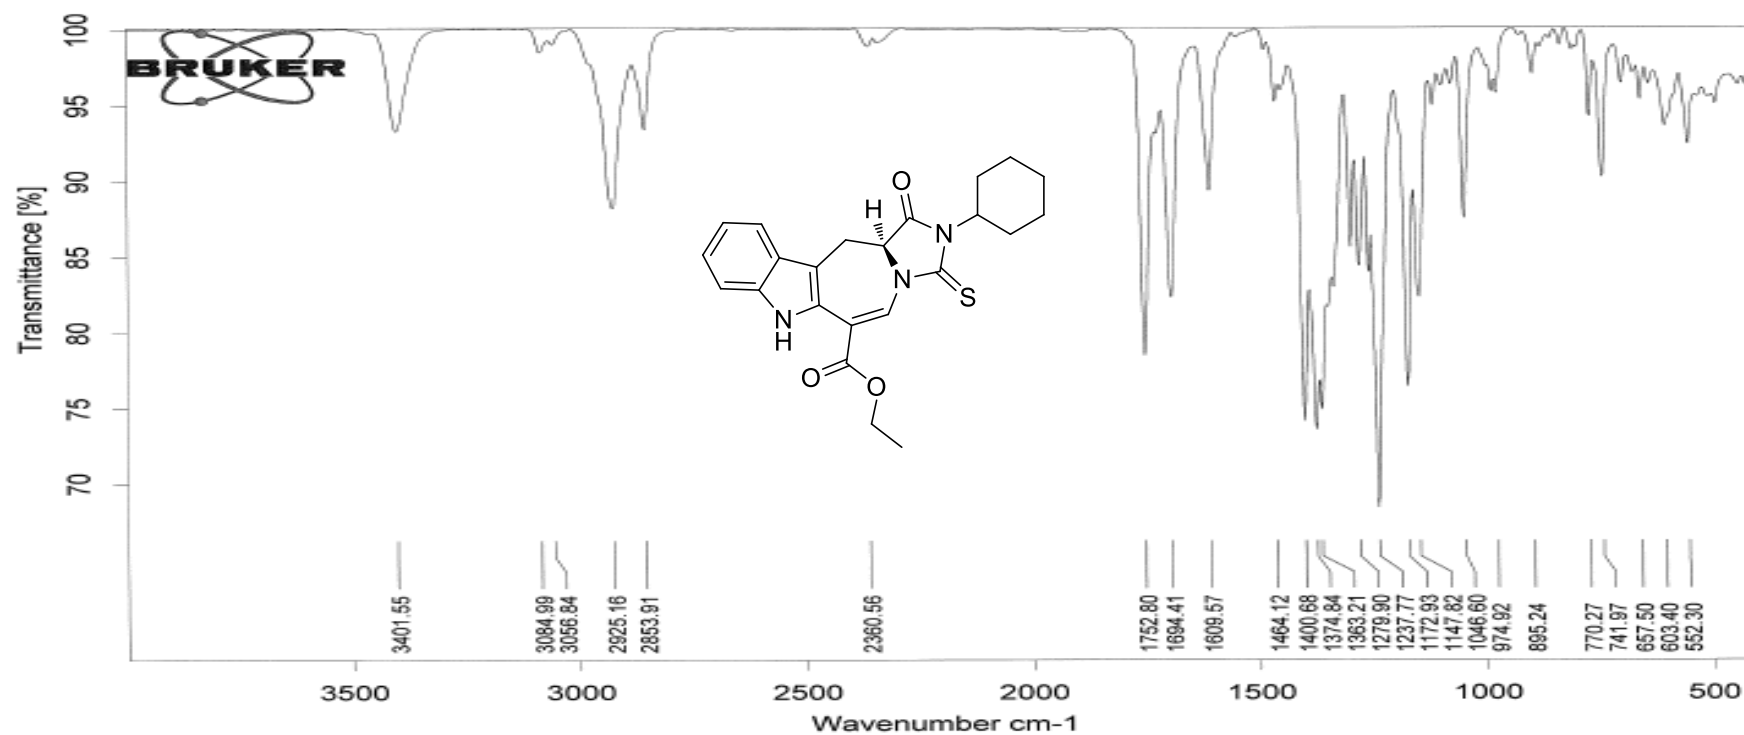

D:\temp-files\FTIR files\20140904\MIR\_TR\_DTGS\_blank KBr\_TT-LN1-091.0      MIR\_TR\_DTGS\_blank KBr\_TT-LN1-091      Instrument type an      2014/9/4

IR spectrum of compound 7s

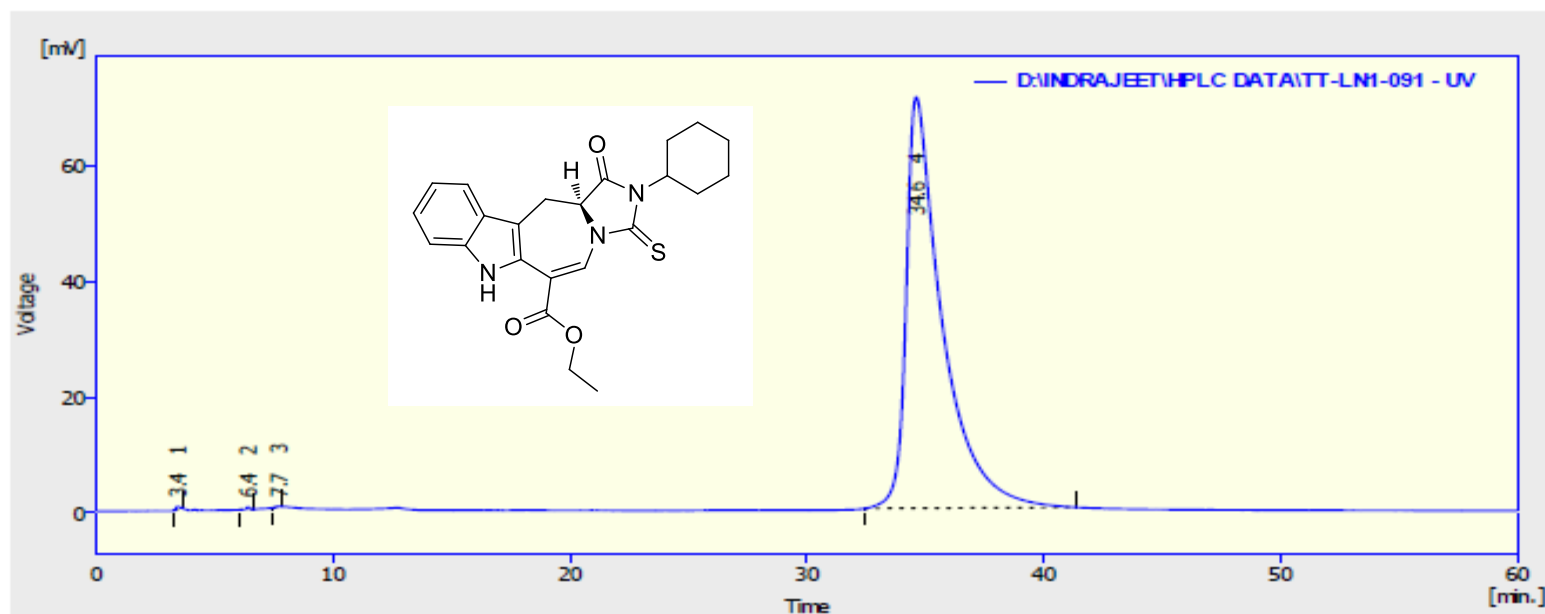

Result Table (Uncal - D:\INDRAJEET\HPLC DATA\TT-LN1-091 - UV)

|   | Reten. Time [min] | Area [mV.s] | Height [mV] | Area [%] | Height [%] |
|---|-------------------|-------------|-------------|----------|------------|
| 1 | 3.436             | 5.502       | 0.497       | 0.1      | 0.7        |
| 2 | 6.400             | 3.800       | 0.439       | 0.1      | 0.6        |
| 3 | 7.696             | 1.766       | 0.152       | 0.0      | 0.2        |
| 4 | 34.624            | 7526.732    | 71.195      | 99.9     | 98.5       |
|   | Total             | 7537.800    | 72.282      | 100.0    | 100.0      |

HPLC of compound 7s

## VIII. X-ray crystal structure of compound 5

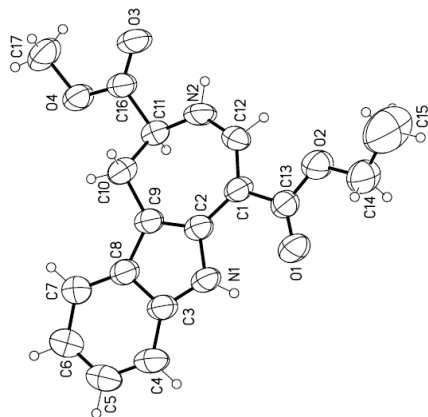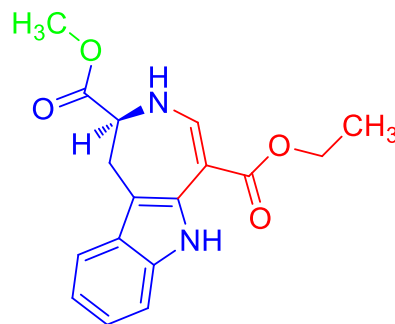

**ORTEP diagram of compound 5.** Atomic displacement ellipsoids are drawn at the 50% probability level

CCDC no. of **5**: 1033162

Table 1. Crystal data and structure refinement for cu\_140110\_0m.

|                      |                           |                              |
|----------------------|---------------------------|------------------------------|
| Identification code  | cu_140110_0m              |                              |
| Empirical formula    | C17 H18 N2 O4             |                              |
| Formula weight       | 314.33                    |                              |
| Temperature          | 296(2) K                  |                              |
| Wavelength           | 1.54178 Å                 |                              |
| Crystal system       | Triclinic                 |                              |
| Space group          | P 1                       |                              |
| Unit cell dimensions | a = 7.9602(7) Å           | $\alpha = 94.238(5)^\circ$ . |
|                      | b = 8.6689(7) Å           | $\beta = 97.302(6)^\circ$ .  |
|                      | c = 11.7774(11) Å         | $\gamma = 96.834(5)^\circ$ . |
| Volume               | 797.12(12) Å <sup>3</sup> |                              |
| Z                    | 2                         |                              |

|                                   |                                             |
|-----------------------------------|---------------------------------------------|
| Density (calculated)              | 1.310 Mg/m <sup>3</sup>                     |
| Absorption coefficient            | 0.778 mm <sup>-1</sup>                      |
| F(000)                            | 332                                         |
| Crystal size                      | 0.25 x 0.15 x 0.12 mm <sup>3</sup>          |
| Theta range for data collection   | 5.160 to 66.403°.                           |
| Index ranges                      | -9<=h<=9, -10<=k<=10, -13<=l<=13            |
| Reflections collected             | 8958                                        |
| Independent reflections           | 4412 [R(int) = 0.0458]                      |
| Completeness to theta = 67.679°   | 93.8 %                                      |
| Absorption correction             | Semi-empirical from equivalents             |
| Max. and min. transmission        | 0.9492 and 0.6197                           |
| Refinement method                 | Full-matrix least-squares on F <sup>2</sup> |
| Data / restraints / parameters    | 4412 / 3 / 420                              |
| Goodness-of-fit on F <sup>2</sup> | 1.096                                       |
| Final R indices [I>2sigma(I)]     | R1 = 0.0744, wR2 = 0.1953                   |
| R indices (all data)              | R1 = 0.0779, wR2 = 0.2031                   |
| Absolute structure parameter      | 0.3(4)                                      |
| Extinction coefficient            | n/a                                         |
| Largest diff. peak and hole       | 0.350 and -0.345 e.Å <sup>-3</sup>          |

Table 2. Atomic coordinates ( $\times 10^4$ ) and equivalent isotropic displacement parameters ( $\text{\AA}^2 \times 10^3$ ) for cu\_140110\_0m.  $U(\text{eq})$  is defined as one third of the trace of the orthogonalized  $U^{ij}$  tensor.

|      | x        | y       | z       | U(eq) |
|------|----------|---------|---------|-------|
| C(1) | 9366(6)  | 470(6)  | 2219(4) | 53(1) |
| C(2) | 9544(5)  | 1576(5) | 3223(4) | 52(1) |
| C(3) | 10412(6) | 3859(6) | 4287(5) | 58(1) |
| C(4) | 11152(7) | 5370(6) | 4723(6) | 70(1) |
| C(5) | 10941(8) | 5870(7) | 5815(6) | 75(2) |
| C(6) | 10013(8) | 4909(7) | 6483(6) | 78(2) |
| C(7) | 9264(7)  | 3421(7) | 6055(5) | 69(1) |
| C(8) | 9474(6)  | 2874(6) | 4954(5) | 56(1) |



|       |          |           |          |        |
|-------|----------|-----------|----------|--------|
| C(9)  | 8926(5)  | 1431(5)   | 4244(4)  | 52(1)  |
| C(10) | 7800(6)  | 77(6)     | 4572(5)  | 60(1)  |
| C(11) | 8308(6)  | -1512(5)  | 4239(4)  | 54(1)  |
| C(12) | 8700(8)  | -1065(7)  | 2192(5)  | 66(1)  |
| C(13) | 9839(6)  | 1002(7)   | 1143(5)  | 59(1)  |
| C(14) | 9885(10) | 387(10)   | -830(6)  | 89(2)  |
| C(15) | 9170(20) | -760(20)  | -1698(9) | 188(7) |
| C(16) | 7110(6)  | -2763(6)  | 4689(5)  | 59(1)  |
| C(17) | 5895(9)  | -3633(10) | 6267(6)  | 89(2)  |
| C(18) | 3906(5)  | 959(6)    | 3257(4)  | 51(1)  |
| C(19) | 3740(5)  | -128(5)   | 2238(4)  | 50(1)  |
| C(20) | 3222(6)  | -2482(6)  | 1220(5)  | 58(1)  |
| C(21) | 2757(9)  | -4050(7)  | 830(6)   | 76(2)  |
| C(22) | 2842(9)  | -4498(7)  | -287(6)  | 79(2)  |
| C(23) | 3369(9)  | -3437(8)  | -1044(6) | 78(2)  |
| C(24) | 3807(8)  | -1863(7)  | -670(5)  | 70(1)  |
| C(25) | 3717(6)  | -1366(6)  | 474(5)   | 57(1)  |
| C(26) | 4010(6)  | 120(6)    | 1139(4)  | 53(1)  |
| C(27) | 4544(7)  | 1650(5)   | 692(4)   | 58(1)  |
| C(28) | 5933(6)  | 2672(5)   | 1516(4)  | 51(1)  |
| C(29) | 4603(6)  | 2493(6)   | 3314(4)  | 53(1)  |
| C(30) | 3333(6)  | 406(6)    | 4310(4)  | 55(1)  |
| C(31) | 3119(9)  | 1058(9)   | 6268(6)  | 80(2)  |
| C(32) | 3732(15) | 2341(12)  | 7165(7)  | 113(3) |
| C(33) | 6764(6)  | 4066(6)   | 969(5)   | 58(1)  |
| C(34) | 7849(11) | 4945(10)  | -648(7)  | 103(3) |
| N(1)  | 10432(5) | 3065(5)   | 3262(4)  | 60(1)  |
| N(2)  | 8211(8)  | -1894(6)  | 3019(5)  | 81(2)  |
| N(3)  | 3244(6)  | -1719(5)  | 2276(4)  | 61(1)  |
| N(4)  | 5358(6)  | 3281(5)   | 2533(4)  | 61(1)  |
| O(1)  | 10497(6) | 2321(5)   | 1034(4)  | 74(1)  |
| O(2)  | 9460(6)  | -69(6)    | 246(4)   | 78(1)  |
| O(3)  | 6291(7)  | -3859(5)  | 4091(4)  | 90(2)  |
| O(4)  | 7043(5)  | -2506(5)  | 5786(3)  | 70(1)  |

|      |         |         |         |       |
|------|---------|---------|---------|-------|
| O(5) | 2721(6) | -915(5) | 4421(4) | 75(1) |
| O(6) | 3589(5) | 1509(5) | 5199(4) | 70(1) |
| O(7) | 7214(7) | 5322(5) | 1477(4) | 87(1) |
| O(8) | 6999(5) | 3702(5) | -88(4)  | 73(1) |

Table 3. Bond lengths [ $\text{\AA}$ ] and angles [ $^\circ$ ] for cu\_140110\_0m.

|              |           |
|--------------|-----------|
| C(1)-C(12)   | 1.369(8)  |
| C(1)-C(2)    | 1.448(7)  |
| C(1)-C(13)   | 1.457(7)  |
| C(2)-C(9)    | 1.365(7)  |
| C(2)-N(1)    | 1.391(6)  |
| C(3)-N(1)    | 1.347(7)  |
| C(3)-C(4)    | 1.403(8)  |
| C(3)-C(8)    | 1.415(7)  |
| C(4)-C(5)    | 1.364(9)  |
| C(4)-H(4)    | 0.9300    |
| C(5)-C(6)    | 1.399(10) |
| C(5)-H(5)    | 0.9300    |
| C(6)-C(7)    | 1.385(8)  |
| C(6)-H(6)    | 0.9300    |
| C(7)-C(8)    | 1.385(8)  |
| C(7)-H(7)    | 0.9300    |
| C(8)-C(9)    | 1.441(7)  |
| C(9)-C(10)   | 1.495(6)  |
| C(10)-C(11)  | 1.519(6)  |
| C(10)-H(10A) | 0.9700    |
| C(10)-H(10B) | 0.9700    |
| C(11)-N(2)   | 1.441(7)  |
| C(11)-C(16)  | 1.527(6)  |
| C(11)-H(11)  | 0.9800    |
| C(12)-N(2)   | 1.322(8)  |
| C(12)-H(12)  | 0.9300    |
| C(13)-O(1)   | 1.223(7)  |

|              |           |
|--------------|-----------|
| C(13)-O(2)   | 1.332(8)  |
| C(14)-C(15)  | 1.385(14) |
| C(14)-O(2)   | 1.425(8)  |
| C(14)-H(14A) | 0.9700    |
| C(14)-H(14B) | 0.9700    |
| C(15)-H(15A) | 0.9600    |
| C(15)-H(15B) | 0.9600    |
| C(15)-H(15C) | 0.9600    |
| C(16)-O(3)   | 1.209(7)  |
| C(16)-O(4)   | 1.304(7)  |
| C(17)-O(4)   | 1.453(7)  |
| C(17)-H(17A) | 0.9600    |
| C(17)-H(17B) | 0.9600    |
| C(17)-H(17C) | 0.9600    |
| C(18)-C(29)  | 1.372(7)  |
| C(18)-C(19)  | 1.452(7)  |
| C(18)-C(30)  | 1.468(7)  |
| C(19)-C(26)  | 1.367(7)  |
| C(19)-N(3)   | 1.395(6)  |
| C(20)-N(3)   | 1.361(8)  |
| C(20)-C(21)  | 1.393(8)  |
| C(20)-C(25)  | 1.409(7)  |
| C(21)-C(22)  | 1.356(10) |
| C(21)-H(21)  | 0.9300    |
| C(22)-C(23)  | 1.393(10) |
| C(22)-H(22)  | 0.9300    |
| C(23)-C(24)  | 1.392(9)  |
| C(23)-H(23)  | 0.9300    |
| C(24)-C(25)  | 1.396(8)  |
| C(24)-H(24)  | 0.9300    |
| C(25)-C(26)  | 1.436(7)  |
| C(26)-C(27)  | 1.497(6)  |
| C(27)-C(28)  | 1.523(6)  |

|                  |           |
|------------------|-----------|
| C(27)-H(27A)     | 0.9700    |
| C(27)-H(27B)     | 0.9700    |
| C(28)-N(4)       | 1.424(7)  |
| C(28)-C(33)      | 1.532(6)  |
| C(28)-H(28)      | 0.9800    |
| C(29)-N(4)       | 1.344(6)  |
| C(29)-H(29)      | 0.9300    |
| C(30)-O(5)       | 1.213(6)  |
| C(30)-O(6)       | 1.342(7)  |
| C(31)-O(6)       | 1.427(7)  |
| C(31)-C(32)      | 1.469(11) |
| C(31)-H(31A)     | 0.9700    |
| C(31)-H(31B)     | 0.9700    |
| C(32)-H(32A)     | 0.9600    |
| C(32)-H(32B)     | 0.9600    |
| C(32)-H(32C)     | 0.9600    |
| C(33)-O(7)       | 1.195(7)  |
| C(33)-O(8)       | 1.303(7)  |
| C(34)-O(8)       | 1.449(7)  |
| C(34)-H(34A)     | 0.9600    |
| C(34)-H(34B)     | 0.9600    |
| C(34)-H(34C)     | 0.9600    |
| N(1)-H(1)        | 0.8600    |
| N(2)-H(2)        | 0.8600    |
| N(3)-H(3)        | 0.8600    |
| N(4)-H(4A)       | 0.8600    |
| C(12)-C(1)-C(2)  | 123.9(5)  |
| C(12)-C(1)-C(13) | 116.6(5)  |
| C(2)-C(1)-C(13)  | 119.4(4)  |
| C(9)-C(2)-N(1)   | 108.1(4)  |
| C(9)-C(2)-C(1)   | 130.0(4)  |
| N(1)-C(2)-C(1)   | 122.0(4)  |
| N(1)-C(3)-C(4)   | 130.8(5)  |
| N(1)-C(3)-C(8)   | 107.9(4)  |

|                     |          |
|---------------------|----------|
| C(4)-C(3)-C(8)      | 121.3(5) |
| C(5)-C(4)-C(3)      | 118.0(6) |
| C(5)-C(4)-H(4)      | 121.0    |
| C(3)-C(4)-H(4)      | 121.0    |
| C(4)-C(5)-C(6)      | 121.2(6) |
| C(4)-C(5)-H(5)      | 119.4    |
| C(6)-C(5)-H(5)      | 119.4    |
| C(7)-C(6)-C(5)      | 121.1(6) |
| C(7)-C(6)-H(6)      | 119.4    |
| C(5)-C(6)-H(6)      | 119.4    |
| C(8)-C(7)-C(6)      | 119.0(6) |
| C(8)-C(7)-H(7)      | 120.5    |
| C(6)-C(7)-H(7)      | 120.5    |
| C(7)-C(8)-C(3)      | 119.3(5) |
| C(7)-C(8)-C(9)      | 134.6(5) |
| C(3)-C(8)-C(9)      | 106.1(5) |
| C(2)-C(9)-C(8)      | 107.6(4) |
| C(2)-C(9)-C(10)     | 127.4(5) |
| C(8)-C(9)-C(10)     | 124.8(5) |
| C(9)-C(10)-C(11)    | 114.8(4) |
| C(9)-C(10)-H(10A)   | 108.6    |
| C(11)-C(10)-H(10A)  | 108.6    |
| C(9)-C(10)-H(10B)   | 108.6    |
| C(11)-C(10)-H(10B)  | 108.6    |
| H(10A)-C(10)-H(10B) | 107.5    |
| N(2)-C(11)-C(10)    | 114.5(4) |
| N(2)-C(11)-C(16)    | 107.1(4) |
| C(10)-C(11)-C(16)   | 108.7(4) |
| N(2)-C(11)-H(11)    | 108.8    |
| C(10)-C(11)-H(11)   | 108.8    |
| C(16)-C(11)-H(11)   | 108.8    |
| N(2)-C(12)-C(1)     | 130.8(5) |
| N(2)-C(12)-H(12)    | 114.6    |
| C(1)-C(12)-H(12)    | 114.6    |

|                     |          |
|---------------------|----------|
| O(1)-C(13)-O(2)     | 121.0(5) |
| O(1)-C(13)-C(1)     | 124.5(5) |
| O(2)-C(13)-C(1)     | 114.5(5) |
| C(15)-C(14)-O(2)    | 109.8(8) |
| C(15)-C(14)-H(14A)  | 109.7    |
| O(2)-C(14)-H(14A)   | 109.7    |
| C(15)-C(14)-H(14B)  | 109.7    |
| O(2)-C(14)-H(14B)   | 109.7    |
| H(14A)-C(14)-H(14B) | 108.2    |
| C(14)-C(15)-H(15A)  | 109.5    |
| C(14)-C(15)-H(15B)  | 109.5    |
| H(15A)-C(15)-H(15B) | 109.5    |
| C(14)-C(15)-H(15C)  | 109.5    |
| H(15A)-C(15)-H(15C) | 109.5    |
| H(15B)-C(15)-H(15C) | 109.5    |
| O(3)-C(16)-O(4)     | 123.5(5) |
| O(3)-C(16)-C(11)    | 123.8(5) |
| O(4)-C(16)-C(11)    | 112.7(4) |
| O(4)-C(17)-H(17A)   | 109.5    |
| O(4)-C(17)-H(17B)   | 109.5    |
| H(17A)-C(17)-H(17B) | 109.5    |
| O(4)-C(17)-H(17C)   | 109.5    |
| H(17A)-C(17)-H(17C) | 109.5    |
| H(17B)-C(17)-H(17C) | 109.5    |
| C(29)-C(18)-C(19)   | 124.0(5) |
| C(29)-C(18)-C(30)   | 116.8(5) |
| C(19)-C(18)-C(30)   | 119.2(4) |
| C(26)-C(19)-N(3)    | 108.1(4) |
| C(26)-C(19)-C(18)   | 130.6(4) |
| N(3)-C(19)-C(18)    | 121.3(4) |
| N(3)-C(20)-C(21)    | 130.7(5) |
| N(3)-C(20)-C(25)    | 107.8(4) |
| C(21)-C(20)-C(25)   | 121.4(6) |

|                     |          |
|---------------------|----------|
| C(22)-C(21)-C(20)   | 118.4(6) |
| C(22)-C(21)-H(21)   | 120.8    |
| C(20)-C(21)-H(21)   | 120.8    |
| C(21)-C(22)-C(23)   | 121.9(6) |
| C(21)-C(22)-H(22)   | 119.1    |
| C(23)-C(22)-H(22)   | 119.1    |
| C(24)-C(23)-C(22)   | 120.3(6) |
| C(24)-C(23)-H(23)   | 119.9    |
| C(22)-C(23)-H(23)   | 119.9    |
| C(23)-C(24)-C(25)   | 119.1(6) |
| C(23)-C(24)-H(24)   | 120.5    |
| C(25)-C(24)-H(24)   | 120.5    |
| C(24)-C(25)-C(20)   | 118.9(5) |
| C(24)-C(25)-C(26)   | 134.5(5) |
| C(20)-C(25)-C(26)   | 106.6(5) |
| C(19)-C(26)-C(25)   | 107.7(4) |
| C(19)-C(26)-C(27)   | 127.0(5) |
| C(25)-C(26)-C(27)   | 125.2(5) |
| C(26)-C(27)-C(28)   | 112.6(4) |
| C(26)-C(27)-H(27A)  | 109.1    |
| C(28)-C(27)-H(27A)  | 109.1    |
| C(26)-C(27)-H(27B)  | 109.1    |
| C(28)-C(27)-H(27B)  | 109.1    |
| H(27A)-C(27)-H(27B) | 107.8    |
| N(4)-C(28)-C(27)    | 113.8(4) |
| N(4)-C(28)-C(33)    | 106.9(4) |
| C(27)-C(28)-C(33)   | 113.0(4) |
| N(4)-C(28)-H(28)    | 107.6    |
| C(27)-C(28)-H(28)   | 107.6    |
| C(33)-C(28)-H(28)   | 107.6    |
| N(4)-C(29)-C(18)    | 130.1(5) |
| N(4)-C(29)-H(29)    | 115.0    |
| C(18)-C(29)-H(29)   | 115.0    |
| O(5)-C(30)-O(6)     | 120.8(5) |

|                     |          |
|---------------------|----------|
| O(5)-C(30)-C(18)    | 125.7(5) |
| O(6)-C(30)-C(18)    | 113.6(4) |
| O(6)-C(31)-C(32)    | 109.1(6) |
| O(6)-C(31)-H(31A)   | 109.9    |
| C(32)-C(31)-H(31A)  | 109.9    |
| O(6)-C(31)-H(31B)   | 109.9    |
| C(32)-C(31)-H(31B)  | 109.9    |
| H(31A)-C(31)-H(31B) | 108.3    |
| C(31)-C(32)-H(32A)  | 109.5    |
| C(31)-C(32)-H(32B)  | 109.5    |
| H(32A)-C(32)-H(32B) | 109.5    |
| C(31)-C(32)-H(32C)  | 109.5    |
| H(32A)-C(32)-H(32C) | 109.5    |
| H(32B)-C(32)-H(32C) | 109.5    |
| O(7)-C(33)-O(8)     | 124.2(5) |
| O(7)-C(33)-C(28)    | 123.4(5) |
| O(8)-C(33)-C(28)    | 112.3(4) |
| O(8)-C(34)-H(34A)   | 109.5    |
| O(8)-C(34)-H(34B)   | 109.5    |
| H(34A)-C(34)-H(34B) | 109.5    |
| O(8)-C(34)-H(34C)   | 109.5    |
| H(34A)-C(34)-H(34C) | 109.5    |
| H(34B)-C(34)-H(34C) | 109.5    |
| C(3)-N(1)-C(2)      | 110.4(4) |
| C(3)-N(1)-H(1)      | 124.8    |
| C(2)-N(1)-H(1)      | 124.8    |
| C(12)-N(2)-C(11)    | 131.7(5) |
| C(12)-N(2)-H(2)     | 114.1    |
| C(11)-N(2)-H(2)     | 114.1    |
| C(20)-N(3)-C(19)    | 109.8(4) |
| C(20)-N(3)-H(3)     | 125.1    |
| C(19)-N(3)-H(3)     | 125.1    |
| C(29)-N(4)-C(28)    | 128.3(4) |
| C(29)-N(4)-H(4A)    | 115.9    |



|                  |          |
|------------------|----------|
| C(28)-N(4)-H(4A) | 115.9    |
| C(13)-O(2)-C(14) | 117.0(5) |
| C(16)-O(4)-C(17) | 115.6(5) |
| C(30)-O(6)-C(31) | 117.3(5) |
| C(33)-O(8)-C(34) | 115.6(5) |

Symmetry transformations used to generate equivalent atoms:

Table 4. Anisotropic displacement parameters ( $\text{\AA}^2 \times 10^3$ ) for cu\_140110\_0m. The anisotropic displacement factor exponent takes the form:  $-2\pi^2 [ h^2 a^{*2} U^{11} + \dots + 2 h k a^* b^* U^{12} ]$

|       | $U^{11}$ | $U^{22}$ | $U^{33}$ | $U^{23}$ | $U^{13}$ | $U^{12}$ |
|-------|----------|----------|----------|----------|----------|----------|
| C(1)  | 51(2)    | 51(3)    | 55(3)    | 9(2)     | 6(2)     | -6(2)    |
| C(2)  | 48(2)    | 37(2)    | 70(3)    | 9(2)     | 8(2)     | 0(2)     |
| C(3)  | 55(2)    | 43(2)    | 72(3)    | 5(2)     | 8(2)     | -2(2)    |
| C(4)  | 70(3)    | 44(3)    | 91(4)    | 8(3)     | 9(3)     | -6(2)    |
| C(5)  | 76(3)    | 53(3)    | 90(4)    | -4(3)    | 5(3)     | 1(2)     |
| C(6)  | 83(4)    | 60(3)    | 85(5)    | -11(3)   | 13(3)    | -2(3)    |
| C(7)  | 73(3)    | 58(3)    | 73(4)    | 0(2)     | 19(3)    | -4(2)    |
| C(8)  | 51(2)    | 49(2)    | 67(3)    | 6(2)     | 12(2)    | 1(2)     |
| C(9)  | 50(2)    | 42(2)    | 63(3)    | 9(2)     | 10(2)    | 1(2)     |
| C(10) | 53(2)    | 53(3)    | 75(3)    | 10(2)    | 20(2)    | -3(2)    |
| C(11) | 55(2)    | 43(2)    | 63(3)    | 6(2)     | 12(2)    | -7(2)    |
| C(12) | 77(3)    | 59(3)    | 56(3)    | -4(2)    | 15(2)    | -14(2)   |
| C(13) | 54(2)    | 64(3)    | 59(3)    | 10(2)    | 10(2)    | -1(2)    |
| C(14) | 100(5)   | 107(5)   | 55(4)    | 10(3)    | 15(3)    | -12(4)   |
| C(15) | 225(15)  | 233(17)  | 73(6)    | 6(8)     | 14(7)    | -97(12)  |
| C(16) | 61(2)    | 51(2)    | 62(3)    | 5(2)     | 12(2)    | -11(2)   |
| C(17) | 92(4)    | 99(5)    | 74(4)    | 21(4)    | 28(3)    | -27(4)   |
| C(18) | 47(2)    | 48(2)    | 58(3)    | 10(2)    | 9(2)     | -1(2)    |
| C(19) | 48(2)    | 43(2)    | 55(3)    | 5(2)     | 4(2)     | -5(2)    |
| C(20) | 62(3)    | 44(2)    | 67(3)    | 7(2)     | 10(2)    | -2(2)    |
| C(21) | 87(4)    | 46(3)    | 91(5)    | 8(3)     | 11(3)    | -7(2)    |
| C(22) | 91(4)    | 47(3)    | 94(5)    | -6(3)    | 10(3)    | -2(3)    |
| C(23) | 87(4)    | 70(4)    | 72(4)    | -13(3)   | 14(3)    | -5(3)    |

|       |        |        |       |       |       |        |
|-------|--------|--------|-------|-------|-------|--------|
| C(24) | 76(3)  | 62(3)  | 68(4) | 0(2)  | 15(3) | -7(3)  |
| C(25) | 52(2)  | 46(2)  | 68(3) | 4(2)  | 7(2)  | -8(2)  |
| C(26) | 56(2)  | 45(2)  | 55(3) | 7(2)  | 4(2)  | -4(2)  |
| C(27) | 63(2)  | 50(2)  | 57(3) | 7(2)  | 6(2)  | -12(2) |
| C(28) | 51(2)  | 45(2)  | 55(3) | 8(2)  | 6(2)  | -4(2)  |
| C(29) | 55(2)  | 47(2)  | 57(3) | 4(2)  | 10(2) | -3(2)  |
| C(30) | 53(2)  | 51(2)  | 59(3) | 6(2)  | 10(2) | -3(2)  |
| C(31) | 93(4)  | 84(4)  | 60(4) | 11(3) | 24(3) | -8(3)  |
| C(32) | 158(8) | 106(6) | 65(5) | -2(4) | 19(5) | -15(5) |
| C(33) | 57(2)  | 54(3)  | 58(3) | 7(2)  | 9(2)  | -14(2) |
| C(34) | 114(5) | 104(6) | 87(5) | 31(4) | 35(4) | -41(4) |
| N(1)  | 62(2)  | 45(2)  | 70(3) | 12(2) | 15(2) | -9(2)  |
| N(2)  | 117(4) | 46(2)  | 73(3) | -3(2) | 29(3) | -30(2) |
| N(3)  | 68(2)  | 43(2)  | 70(3) | 12(2) | 11(2) | -8(2)  |
| N(4)  | 76(2)  | 44(2)  | 59(3) | 3(2)  | 15(2) | -12(2) |
| O(1)  | 86(3)  | 64(2)  | 72(3) | 18(2) | 24(2) | -12(2) |
| O(2)  | 93(3)  | 80(3)  | 56(2) | 3(2)  | 20(2) | -21(2) |
| O(3)  | 115(3) | 67(3)  | 74(3) | -2(2) | 25(2) | -42(2) |
| O(4)  | 76(2)  | 65(2)  | 63(2) | 12(2) | 14(2) | -21(2) |
| O(5)  | 91(3)  | 57(2)  | 76(3) | 12(2) | 27(2) | -14(2) |
| O(6)  | 84(2)  | 64(2)  | 62(2) | 8(2)  | 22(2) | -8(2)  |
| O(7)  | 117(4) | 57(2)  | 81(3) | 0(2)  | 30(3) | -32(2) |
| O(8)  | 80(2)  | 69(2)  | 69(3) | 11(2) | 27(2) | -17(2) |

Table 5. Hydrogen coordinates ( $\times 10^4$ ) and isotropic displacement parameters ( $\text{\AA}^2 \times 10^{-3}$ ) for cu\_140110\_0m.

|      | x     | y    | z    | U(eq) |
|------|-------|------|------|-------|
| H(4) | 11768 | 6013 | 4281 | 84    |
| H(5) | 11422 | 6868 | 6121 | 90    |
| H(6) | 9897  | 5276 | 7228 | 93    |
| H(7) | 8631  | 2799 | 6500 | 82    |

|        |       |       |       |     |
|--------|-------|-------|-------|-----|
| H(10A) | 6641  | 113   | 4214  | 72  |
| H(10B) | 7803  | 190   | 5398  | 72  |
| H(11)  | 9478  | -1553 | 4601  | 65  |
| H(12)  | 8568  | -1618 | 1472  | 79  |
| H(14A) | 9457  | 1364  | -983  | 107 |
| H(14B) | 11117 | 544   | -806  | 107 |
| H(15A) | 7966  | -722  | -1855 | 282 |
| H(15B) | 9376  | -1762 | -1461 | 282 |
| H(15C) | 9686  | -578  | -2380 | 282 |
| H(17A) | 6219  | -4656 | 6135  | 134 |
| H(17B) | 4746  | -3621 | 5905  | 134 |
| H(17C) | 5960  | -3365 | 7078  | 134 |
| H(21)  | 2398  | -4772 | 1323  | 91  |
| H(22)  | 2538  | -5543 | -555  | 95  |
| H(23)  | 3429  | -3783 | -1803 | 94  |
| H(24)  | 4155  | -1152 | -1174 | 84  |
| H(27A) | 3557  | 2203  | 558   | 70  |
| H(27B) | 4958  | 1458  | -39   | 70  |
| H(28)  | 6827  | 2028  | 1748  | 61  |
| H(29)  | 4544  | 3079  | 3998  | 64  |
| H(31A) | 3619  | 130   | 6466  | 95  |
| H(31B) | 1886  | 822   | 6205  | 95  |
| H(32A) | 3262  | 3265  | 6952  | 169 |
| H(32B) | 4956  | 2535  | 7249  | 169 |
| H(32C) | 3379  | 2062  | 7880  | 169 |
| H(34A) | 8954  | 5300  | -221  | 155 |
| H(34B) | 7179  | 5795  | -680  | 155 |
| H(34C) | 7978  | 4563  | -1414 | 155 |
| H(1)   | 10923 | 3428  | 2710  | 71  |
| H(2)   | 7752  | -2831 | 2786  | 97  |
| H(3)   | 2991  | -2154 | 2876  | 73  |
| H(4A)  | 5512  | 4280  | 2665  | 73  |

## IX. X-ray crystal structure of 7b

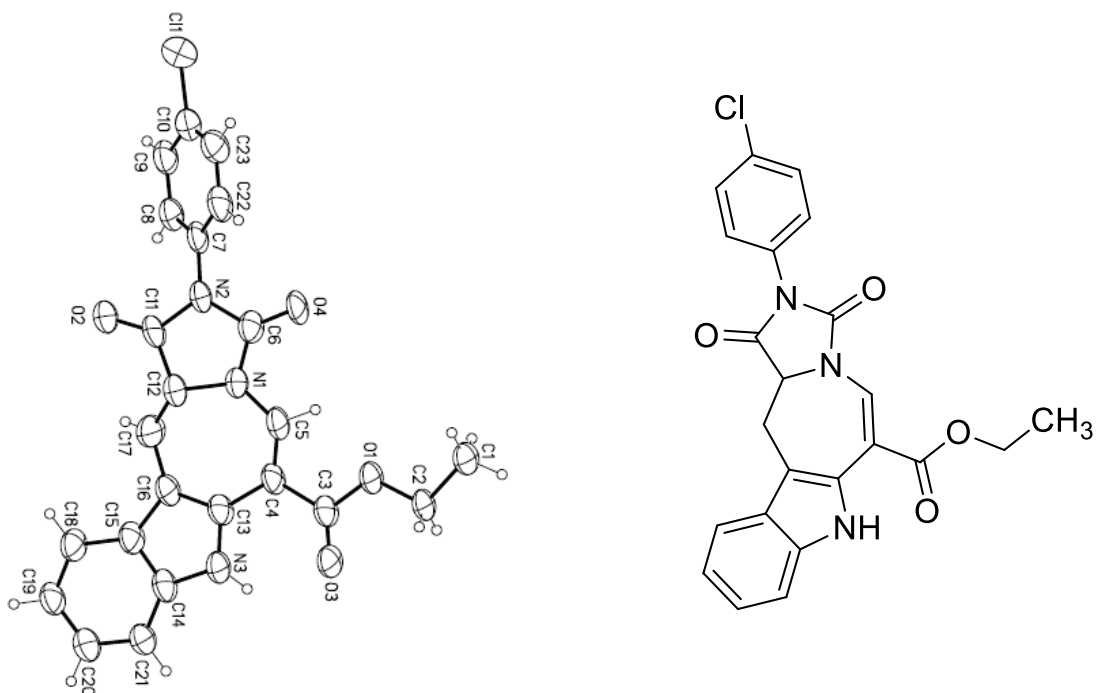

**ORTEP diagram of compound 7b.** Atomic displacement ellipsoids are drawn at the 50% probability level

CCDC no. of **7b**: 1028024

**Table 1.** Crystal data and structure refinement for 7b.

|                     |                                                                  |
|---------------------|------------------------------------------------------------------|
| Identification code | cu_140906lt_0m                                                   |
| Empirical formula   | C <sub>23</sub> H <sub>16</sub> Cl N <sub>3</sub> O <sub>4</sub> |
| Formula weight      | 433.84                                                           |
| Temperature         | 100(2) K                                                         |
| Wavelength          | 1.54178 Å                                                        |
| Crystal system      | Monoclinic                                                       |
| Space group         | P 2 <sub>1</sub> /c                                              |

|                                   |                                                                                                                                  |
|-----------------------------------|----------------------------------------------------------------------------------------------------------------------------------|
| Unit cell dimensions              | a = 6.6540(3) Å $\alpha = 90^\circ$ .<br>b = 12.6487(7) Å $\beta = 97.152(3)^\circ$ .<br>c = 23.3926(13) Å $\gamma = 90^\circ$ . |
| Volume                            | 1953.51(18) Å <sup>3</sup>                                                                                                       |
| Z                                 | 4                                                                                                                                |
| Density (calculated)              | 1.475 Mg/m <sup>3</sup>                                                                                                          |
| Absorption coefficient            | 2.058 mm <sup>-1</sup>                                                                                                           |
| F(000)                            | 896                                                                                                                              |
| Crystal size                      | 0.30 x 0.01 x 0.01 mm <sup>3</sup>                                                                                               |
| Theta range for data collection   | 3.809 to 66.826°.                                                                                                                |
| Index ranges                      | -7 ≤ h ≤ 4, -13 ≤ k ≤ 15, -27 ≤ l ≤ 27                                                                                           |
| Reflections collected             | 12712                                                                                                                            |
| Independent reflections           | 3385 [R(int) = 0.0726]                                                                                                           |
| Completeness to theta = 67.679°   | 96.2 %                                                                                                                           |
| Absorption correction             | Semi-empirical from equivalents                                                                                                  |
| Max. and min. transmission        | 0.9492 and 0.4939                                                                                                                |
| Refinement method                 | Full-matrix least-squares on F <sup>2</sup>                                                                                      |
| Data / restraints / parameters    | 3385 / 0 / 281                                                                                                                   |
| Goodness-of-fit on F <sup>2</sup> | 1.132                                                                                                                            |
| Final R indices [I > 2σ(I)]       | R1 = 0.0852, wR2 = 0.2415                                                                                                        |
| R indices (all data)              | R1 = 0.1359, wR2 = 0.2862                                                                                                        |
| Extinction coefficient            | n/a                                                                                                                              |
| Largest diff. peak and hole       | 0.579 and -0.415 e.Å <sup>-3</sup>                                                                                               |

Table 2. Atomic coordinates (x 10<sup>4</sup>) and equivalent isotropic displacement parameters (Å<sup>2</sup>x 10<sup>3</sup>) for CU\_140906LT\_0M. U(eq) is defined as one third of the trace of the orthogonalized U<sup>ij</sup> tensor.

|       | x       | y        | z        | U(eq) |
|-------|---------|----------|----------|-------|
| Cl(1) | 1805(3) | -4503(2) | 10614(1) | 95(1) |
| O(1)  | 2237(4) | 1255(3)  | 6995(1)  | 54(1) |
| O(2)  | 7333(5) | -581(3)  | 9822(2)  | 76(1) |
| O(3)  | 4614(5) | 2442(3)  | 6855(2)  | 56(1) |
| O(4)  | 1963(4) | -1036(3) | 8426(1)  | 54(1) |

|       |          |          |          |       |
|-------|----------|----------|----------|-------|
| N(1)  | 4702(6)  | 93(4)    | 8484(2)  | 57(1) |
| N(2)  | 4454(6)  | -1025(3) | 9210(2)  | 53(1) |
| N(3)  | 7940(6)  | 2591(3)  | 7627(2)  | 53(1) |
| C(1)  | -972(7)  | 1051(4)  | 6451(2)  | 55(1) |
| C(2)  | 968(6)   | 1676(4)  | 6498(2)  | 53(1) |
| C(3)  | 4037(7)  | 1741(4)  | 7143(2)  | 47(1) |
| C(4)  | 5136(6)  | 1312(4)  | 7688(2)  | 47(1) |
| C(5)  | 4160(7)  | 574(4)   | 7958(2)  | 50(1) |
| C(6)  | 3505(7)  | -694(4)  | 8673(2)  | 50(1) |
| C(7)  | 3752(7)  | -1874(4) | 9533(2)  | 49(1) |
| C(8)  | 5045(7)  | -2713(4) | 9682(2)  | 53(1) |
| C(9)  | 4464(8)  | -3529(4) | 10013(2) | 60(1) |
| C(10) | 2528(8)  | -3485(5) | 10179(2) | 66(2) |
| C(11) | 6196(8)  | -447(5)  | 9385(3)  | 72(2) |
| C(12) | 6317(9)  | 412(6)   | 8941(3)  | 91(2) |
| C(13) | 7127(6)  | 1756(4)  | 7900(2)  | 48(1) |
| C(14) | 9819(7)  | 2840(4)  | 7904(2)  | 50(1) |
| C(15) | 10174(7) | 2157(4)  | 8379(2)  | 52(1) |
| C(16) | 8454(7)  | 1468(5)  | 8368(2)  | 57(1) |
| C(17) | 8276(9)  | 567(7)   | 8774(3)  | 98(3) |
| C(18) | 12008(7) | 2263(5)  | 8751(2)  | 57(1) |
| C(19) | 13405(7) | 3001(4)  | 8616(2)  | 54(1) |
| C(20) | 13033(7) | 3638(4)  | 8132(2)  | 56(1) |
| C(21) | 11229(7) | 3583(4)  | 7776(2)  | 56(1) |
| C(22) | 1821(7)  | -1845(5) | 9703(2)  | 59(1) |
| C(23) | 1210(8)  | -2667(5) | 10029(2) | 64(2) |

Table 3. Bond lengths [ $\text{\AA}$ ] and angles [ $^\circ$ ] for CU\_140906LT\_0M.

|             |          |
|-------------|----------|
| O(1)-C(3)   | 1.352(6) |
| O(1)-C(2)   | 1.451(5) |
| O(2)-C(11)  | 1.205(6) |
| O(3)-C(3)   | 1.206(6) |
| O(4)-C(6)   | 1.193(6) |
| N(1)-C(5)   | 1.380(6) |
| N(1)-C(6)   | 1.382(7) |
| N(1)-C(12)  | 1.475(6) |
| N(2)-C(11)  | 1.389(6) |
| N(2)-C(6)   | 1.398(6) |
| N(2)-C(7)   | 1.426(7) |
| N(3)-C(14)  | 1.372(6) |
| N(3)-C(13)  | 1.379(6) |
| N(3)-H(5)   | 0.8800   |
| C(1)-C(2)   | 1.506(7) |
| C(1)-H(1)   | 0.9800   |
| C(1)-H(13)  | 0.9800   |
| C(1)-H(14)  | 0.9800   |
| C(2)-H(11)  | 0.9900   |
| C(2)-H(12)  | 0.9900   |
| C(3)-C(4)   | 1.490(7) |
| C(4)-C(5)   | 1.339(7) |
| C(4)-C(13)  | 1.467(6) |
| C(5)-H(4)   | 0.9500   |
| C(7)-C(8)   | 1.383(7) |
| C(7)-C(22)  | 1.391(6) |
| C(8)-C(9)   | 1.374(7) |
| C(8)-H(2)   | 0.9500   |
| C(9)-C(10)  | 1.392(7) |
| C(9)-H(3)   | 0.9500   |
| C(10)-C(23) | 1.373(8) |
| C(11)-C(12) | 1.511(8) |
| C(12)-C(17) | 1.421(9) |

|                  |          |
|------------------|----------|
| C(13)-C(16)      | 1.369(6) |
| C(14)-C(21)      | 1.387(7) |
| C(14)-C(15)      | 1.404(7) |
| C(15)-C(18)      | 1.413(6) |
| C(15)-C(16)      | 1.436(7) |
| C(16)-C(17)      | 1.497(8) |
| C(17)-H(6)       | 0.9500   |
| C(18)-C(19)      | 1.381(7) |
| C(18)-H(10)      | 0.9500   |
| C(19)-C(20)      | 1.386(8) |
| C(19)-H(9)       | 0.9500   |
| C(20)-C(21)      | 1.374(7) |
| C(20)-H(8)       | 0.9500   |
| C(21)-H(7)       | 0.9500   |
| C(22)-C(23)      | 1.381(8) |
| C(22)-H(16)      | 0.9500   |
| C(23)-H(15)      | 0.9500   |
| C(3)-O(1)-C(2)   | 116.6(4) |
| C(5)-N(1)-C(6)   | 120.4(4) |
| C(5)-N(1)-C(12)  | 127.8(4) |
| C(6)-N(1)-C(12)  | 111.2(4) |
| C(11)-N(2)-C(6)  | 112.0(4) |
| C(11)-N(2)-C(7)  | 123.8(4) |
| C(6)-N(2)-C(7)   | 124.2(4) |
| C(14)-N(3)-C(13) | 110.1(4) |
| C(14)-N(3)-H(5)  | 124.9    |
| C(13)-N(3)-H(5)  | 124.9    |
| C(2)-C(1)-H(1)   | 109.5    |
| C(2)-C(1)-H(13)  | 109.5    |
| H(1)-C(1)-H(13)  | 109.5    |
| C(2)-C(1)-H(14)  | 109.5    |
| H(1)-C(1)-H(14)  | 109.5    |
| H(13)-C(1)-H(14) | 109.5    |



|                   |          |
|-------------------|----------|
| O(1)-C(2)-C(1)    | 106.0(4) |
| O(1)-C(2)-H(11)   | 110.5    |
| C(1)-C(2)-H(11)   | 110.5    |
| O(1)-C(2)-H(12)   | 110.5    |
| C(1)-C(2)-H(12)   | 110.5    |
| H(11)-C(2)-H(12)  | 108.7    |
| O(3)-C(3)-O(1)    | 121.6(4) |
| O(3)-C(3)-C(4)    | 126.1(4) |
| O(1)-C(3)-C(4)    | 112.2(4) |
| C(5)-C(4)-C(13)   | 125.3(4) |
| C(5)-C(4)-C(3)    | 116.2(4) |
| C(13)-C(4)-C(3)   | 118.4(4) |
| C(4)-C(5)-N(1)    | 129.7(4) |
| C(4)-C(5)-H(4)    | 115.1    |
| N(1)-C(5)-H(4)    | 115.1    |
| O(4)-C(6)-N(1)    | 127.0(5) |
| O(4)-C(6)-N(2)    | 126.2(5) |
| N(1)-C(6)-N(2)    | 106.8(4) |
| C(8)-C(7)-C(22)   | 121.1(5) |
| C(8)-C(7)-N(2)    | 118.5(4) |
| C(22)-C(7)-N(2)   | 120.4(5) |
| C(9)-C(8)-C(7)    | 120.5(5) |
| C(9)-C(8)-H(2)    | 119.7    |
| C(7)-C(8)-H(2)    | 119.7    |
| C(8)-C(9)-C(10)   | 117.5(5) |
| C(8)-C(9)-H(3)    | 121.2    |
| C(10)-C(9)-H(3)   | 121.2    |
| C(23)-C(10)-C(9)  | 122.8(5) |
| C(23)-C(10)-Cl(1) | 119.4(5) |
| C(9)-C(10)-Cl(1)  | 117.7(5) |
| O(2)-C(11)-N(2)   | 126.1(5) |
| O(2)-C(11)-C(12)  | 127.0(5) |
| N(2)-C(11)-C(12)  | 106.8(4) |
| C(17)-C(12)-N(1)  | 116.7(6) |
| C(17)-C(12)-C(11) | 114.7(6) |

|                   |          |
|-------------------|----------|
| N(1)-C(12)-C(11)  | 101.9(4) |
| C(16)-C(13)-N(3)  | 108.9(4) |
| C(16)-C(13)-C(4)  | 129.3(5) |
| N(3)-C(13)-C(4)   | 121.8(4) |
| N(3)-C(14)-C(21)  | 130.9(5) |
| N(3)-C(14)-C(15)  | 106.7(4) |
| C(21)-C(14)-C(15) | 122.4(4) |
| C(14)-C(15)-C(18) | 118.4(5) |
| C(14)-C(15)-C(16) | 107.7(4) |
| C(18)-C(15)-C(16) | 133.9(5) |
| C(13)-C(16)-C(15) | 106.6(5) |
| C(13)-C(16)-C(17) | 128.0(5) |
| C(15)-C(16)-C(17) | 125.2(4) |
| C(12)-C(17)-C(16) | 115.3(6) |
| C(12)-C(17)-H(6)  | 122.3    |
| C(16)-C(17)-H(6)  | 122.3    |
| C(19)-C(18)-C(15) | 118.6(5) |
| C(19)-C(18)-H(10) | 120.7    |
| C(15)-C(18)-H(10) | 120.7    |
| C(18)-C(19)-C(20) | 121.5(5) |
| C(18)-C(19)-H(9)  | 119.3    |
| C(20)-C(19)-H(9)  | 119.3    |
| C(21)-C(20)-C(19) | 121.3(5) |
| C(21)-C(20)-H(8)  | 119.4    |
| C(19)-C(20)-H(8)  | 119.4    |
| C(20)-C(21)-C(14) | 117.8(5) |
| C(20)-C(21)-H(7)  | 121.1    |
| C(14)-C(21)-H(7)  | 121.1    |
| C(23)-C(22)-C(7)  | 118.9(5) |
| C(23)-C(22)-H(16) | 120.6    |
| C(7)-C(22)-H(16)  | 120.6    |
| C(10)-C(23)-C(22) | 119.1(5) |
| C(10)-C(23)-H(15) | 120.5    |
| C(22)-C(23)-H(15) | 120.5    |

Symmetry transformations used to generate equivalent atoms:

Table 4. Anisotropic displacement parameters ( $\text{\AA}^2 \times 10^3$ ) for CU\_140906LT\_0M. The anisotropic displacement factor exponent takes the form:  $-2\pi^2 [h^2 a^{*2} U^{11} + \dots + 2 h k a^* b^* U^{12}]$

|       | U <sup>11</sup> | U <sup>22</sup> | U <sup>33</sup> | U <sup>23</sup> | U <sup>13</sup> | U <sup>12</sup> |
|-------|-----------------|-----------------|-----------------|-----------------|-----------------|-----------------|
| Cl(1) | 86(1)           | 108(1)          | 89(1)           | 25(1)           | -3(1)           | -41(1)          |
| O(1)  | 26(2)           | 73(2)           | 58(2)           | 7(2)            | -8(1)           | 1(2)            |
| O(2)  | 44(2)           | 99(3)           | 76(3)           | 27(2)           | -24(2)          | -21(2)          |
| O(3)  | 28(2)           | 81(2)           | 57(2)           | 8(2)            | -4(1)           | 2(2)            |
| O(4)  | 24(2)           | 76(2)           | 59(2)           | -1(2)           | -12(1)          | -3(2)           |
| N(1)  | 37(2)           | 70(3)           | 58(3)           | 15(2)           | -17(2)          | -9(2)           |
| N(2)  | 29(2)           | 69(3)           | 56(2)           | 4(2)            | -12(2)          | -6(2)           |
| N(3)  | 32(2)           | 69(3)           | 55(3)           | 4(2)            | -8(2)           | 1(2)            |
| C(1)  | 30(2)           | 73(3)           | 60(3)           | 7(3)            | -5(2)           | 3(2)            |
| C(2)  | 24(2)           | 74(3)           | 58(3)           | 7(3)            | -8(2)           | -3(2)           |
| C(3)  | 27(2)           | 59(3)           | 54(3)           | -1(2)           | -2(2)           | 3(2)            |
| C(4)  | 24(2)           | 62(3)           | 54(3)           | -1(2)           | -4(2)           | 0(2)            |
| C(5)  | 32(2)           | 58(3)           | 56(3)           | -3(2)           | -11(2)          | 1(2)            |
| C(6)  | 34(2)           | 64(3)           | 51(3)           | 0(2)            | -2(2)           | 7(2)            |
| C(7)  | 26(2)           | 66(3)           | 51(3)           | -2(2)           | -10(2)          | -4(2)           |
| C(8)  | 32(2)           | 65(3)           | 59(3)           | -1(3)           | -7(2)           | -1(2)           |
| C(9)  | 40(3)           | 66(3)           | 66(3)           | 2(3)            | -15(2)          | -3(3)           |
| C(10) | 52(3)           | 88(4)           | 54(3)           | 5(3)            | -8(2)           | -20(3)          |
| C(11) | 35(3)           | 89(4)           | 82(4)           | 24(3)           | -27(3)          | -21(3)          |
| C(12) | 53(3)           | 132(6)          | 78(4)           | 41(4)           | -34(3)          | -42(4)          |
| C(13) | 27(2)           | 59(3)           | 55(3)           | -1(2)           | 1(2)            | 3(2)            |
| C(14) | 28(2)           | 66(3)           | 54(3)           | -8(2)           | 0(2)            | 1(2)            |
| C(15) | 28(2)           | 75(3)           | 54(3)           | 0(3)            | 1(2)            | 3(2)            |
| C(16) | 26(2)           | 82(4)           | 61(3)           | 7(3)            | -4(2)           | -7(3)           |
| C(17) | 45(3)           | 151(7)          | 89(5)           | 59(5)           | -24(3)          | -29(4)          |
| C(18) | 32(2)           | 87(4)           | 52(3)           | 7(3)            | 0(2)            | 2(3)            |
| C(19) | 31(2)           | 73(3)           | 56(3)           | -4(3)           | 0(2)            | -4(2)           |
| C(20) | 38(3)           | 65(3)           | 62(3)           | -5(3)           | 0(2)            | -1(2)           |

|       |       |       |       |       |       |       |
|-------|-------|-------|-------|-------|-------|-------|
| C(21) | 33(2) | 72(3) | 60(3) | 6(3)  | -2(2) | -4(3) |
| C(22) | 29(2) | 82(4) | 63(3) | -7(3) | -4(2) | 0(3)  |
| C(23) | 35(3) | 88(4) | 67(4) | 4(3)  | 1(2)  | -9(3) |

Table 5. Hydrogen coordinates ( $\times 10^4$ ) and isotropic displacement parameters ( $\text{\AA}^2 \times 10^{-3}$ ) for CU\_140906LT\_0M.

|       | x     | y     | z     | U(eq) |
|-------|-------|-------|-------|-------|
| H(5)  | 7341  | 2916  | 7319  | 64    |
| H(1)  | -686  | 307   | 6376  | 83    |
| H(13) | -1924 | 1331  | 6133  | 83    |
| H(14) | -1569 | 1107  | 6812  | 83    |
| H(11) | 1636  | 1592  | 6146  | 64    |
| H(12) | 696   | 2437  | 6553  | 64    |
| H(4)  | 2905  | 347   | 7757  | 60    |
| H(2)  | 6345  | -2726 | 9554  | 64    |
| H(3)  | 5352  | -4101 | 10125 | 71    |
| H(6)  | 9395  | 130   | 8910  | 117   |
| H(10) | 12274 | 1836  | 9085  | 69    |
| H(9)  | 14649 | 3073  | 8860  | 64    |
| H(8)  | 14044 | 4121  | 8045  | 67    |
| H(7)  | 10958 | 4040  | 7453  | 67    |
| H(16) | 938   | -1268 | 9596  | 71    |
| H(15) | -103  | -2667 | 10148 | 77    |

## X. X-ray crystal structure of 7r

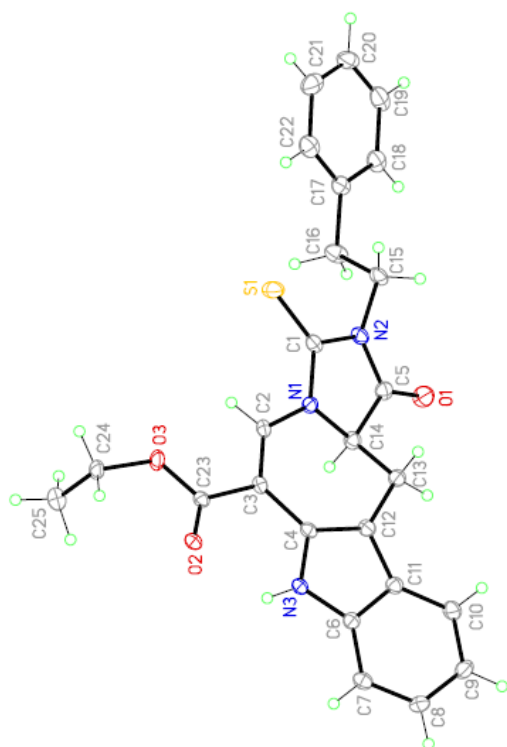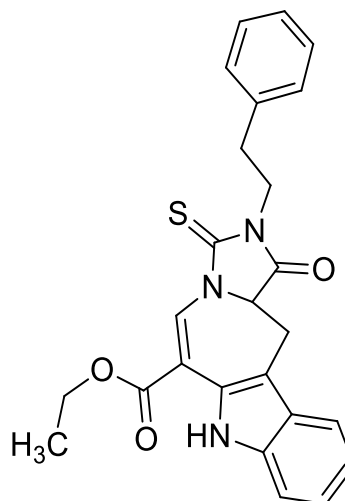

**ORTEP diagram of compound 7r.** Atomic displacement ellipsoids are drawn at the 50% probability level

CCDC no. of **7r**: 1027211

Table 1. Crystal data and structure refinement for 7r.

|                     |                                                                 |
|---------------------|-----------------------------------------------------------------|
| Identification code | 140905LT_a                                                      |
| Empirical formula   | C <sub>25</sub> H <sub>23</sub> N <sub>3</sub> O <sub>3</sub> S |
| Formula weight      | 445.52                                                          |
| Temperature         | 100(2) K                                                        |
| Wavelength          | 0.71073 Å                                                       |
| Crystal system      | Monoclinic                                                      |
| Space group         | P 21/c                                                          |

|                                   |                                                                                                                                 |
|-----------------------------------|---------------------------------------------------------------------------------------------------------------------------------|
| Unit cell dimensions              | a = 12.6842(5) Å $\alpha = 90^\circ$ .<br>b = 20.3035(8) Å $\beta = 99.772(2)^\circ$ .<br>c = 8.2806(3) Å $\gamma = 90^\circ$ . |
| Volume                            | 2101.59(14) Å <sup>3</sup>                                                                                                      |
| Z                                 | 4                                                                                                                               |
| Density (calculated)              | 1.408 Mg/m <sup>3</sup>                                                                                                         |
| Absorption coefficient            | 0.188 mm <sup>-1</sup>                                                                                                          |
| F(000)                            | 936                                                                                                                             |
| Crystal size                      | 0.30 x 0.07 x 0.07 mm <sup>3</sup>                                                                                              |
| Theta range for data collection   | 1.629 to 26.363°.                                                                                                               |
| Index ranges                      | -15 ≤ h ≤ 15, -25 ≤ k ≤ 25, -10 ≤ l ≤ 5                                                                                         |
| Reflections collected             | 15564                                                                                                                           |
| Independent reflections           | 4291 [R(int) = 0.0368]                                                                                                          |
| Completeness to theta = 25.242°   | 99.8 %                                                                                                                          |
| Absorption correction             | Semi-empirical from equivalents                                                                                                 |
| Max. and min. transmission        | 0.9485 and 0.8830                                                                                                               |
| Refinement method                 | Full-matrix least-squares on F <sup>2</sup>                                                                                     |
| Data / restraints / parameters    | 4291 / 0 / 290                                                                                                                  |
| Goodness-of-fit on F <sup>2</sup> | 1.157                                                                                                                           |
| Final R indices [I > 2σ(I)]       | R1 = 0.0397, wR2 = 0.1212                                                                                                       |
| R indices (all data)              | R1 = 0.0550, wR2 = 0.1514                                                                                                       |
| Extinction coefficient            | n/a                                                                                                                             |
| Largest diff. peak and hole       | 0.530 and -0.433 e.Å <sup>-3</sup>                                                                                              |

Table 2. Atomic coordinates ( $\times 10^4$ ) and equivalent isotropic displacement parameters ( $\text{\AA}^2 \times 10^3$ ) for 140905lt\_A.  $U(\text{eq})$  is defined as one third of the trace of the orthogonalized  $U^{ij}$  tensor.

|       | x       | y       | z        | U(eq) |
|-------|---------|---------|----------|-------|
| C(1)  | 2846(2) | 4271(1) | 3163(2)  | 15(1) |
| C(2)  | 3707(2) | 4270(1) | 790(2)   | 13(1) |
| C(3)  | 3949(1) | 4510(1) | -626(2)  | 13(1) |
| C(4)  | 3453(2) | 5090(1) | -1509(2) | 12(1) |
| C(5)  | 1224(2) | 4753(1) | 2164(2)  | 16(1) |
| C(6)  | 3192(2) | 5840(1) | -3535(2) | 13(1) |
| C(7)  | 3225(2) | 6204(1) | -4970(2) | 16(1) |
| C(8)  | 2530(2) | 6729(1) | -5269(2) | 17(1) |
| C(9)  | 1832(2) | 6898(1) | -4186(2) | 19(1) |
| C(10) | 1800(2) | 6532(1) | -2784(2) | 19(1) |
| C(11) | 2486(2) | 5986(1) | -2448(2) | 15(1) |
| C(12) | 2650(2) | 5505(1) | -1168(2) | 15(1) |
| C(13) | 2031(2) | 5475(1) | 209(2)   | 16(1) |
| C(14) | 1880(2) | 4776(1) | 790(2)   | 16(1) |
| C(15) | 1550(2) | 4365(1) | 5108(2)  | 17(1) |
| C(16) | 1128(2) | 3663(1) | 5268(2)  | 21(1) |
| C(17) | 1144(2) | 3468(1) | 7038(2)  | 17(1) |
| C(18) | 227(2)  | 3505(1) | 7745(2)  | 21(1) |
| C(19) | 258(2)  | 3321(1) | 9371(3)  | 27(1) |
| C(20) | 1203(2) | 3099(1) | 10301(2) | 28(1) |
| C(21) | 2117(2) | 3058(1) | 9605(2)  | 27(1) |
| C(22) | 2090(2) | 3248(1) | 7988(2)  | 21(1) |
| C(23) | 4822(2) | 4159(1) | -1266(2) | 13(1) |
| C(24) | 5832(2) | 3155(1) | -1116(2) | 18(1) |
| C(25) | 5297(2) | 2639(1) | -2284(2) | 25(1) |
| N(1)  | 2886(1) | 4464(1) | 1575(2)  | 14(1) |
| N(2)  | 1869(1) | 4468(1) | 3512(2)  | 16(1) |
| N(3)  | 3774(1) | 5297(1) | -2941(2) | 14(1) |

|      |         |         |          |       |
|------|---------|---------|----------|-------|
| O(1) | 320(1)  | 4950(1) | 2132(2)  | 22(1) |
| O(2) | 5306(1) | 4373(1) | -2301(2) | 15(1) |
| O(3) | 5018(1) | 3564(1) | -573(2)  | 19(1) |
| S(1) | 3787(1) | 3887(1) | 4412(1)  | 21(1) |



Table 3. Bond lengths [Å] and angles [°] for 140905lt\_A.

|              |            |
|--------------|------------|
| C(1)-N(2)    | 1.378(2)   |
| C(1)-N(1)    | 1.381(2)   |
| C(1)-S(1)    | 1.6391(19) |
| C(2)-C(3)    | 1.352(3)   |
| C(2)-N(1)    | 1.376(2)   |
| C(2)-H(2)    | 0.9500     |
| C(3)-C(4)    | 1.470(2)   |
| C(3)-C(23)   | 1.489(3)   |
| C(4)-N(3)    | 1.383(2)   |
| C(4)-C(12)   | 1.388(3)   |
| C(5)-O(1)    | 1.210(2)   |
| C(5)-N(2)    | 1.393(2)   |
| C(5)-C(14)   | 1.521(3)   |
| C(6)-N(3)    | 1.370(2)   |
| C(6)-C(11)   | 1.405(3)   |
| C(6)-C(7)    | 1.406(3)   |
| C(7)-C(8)    | 1.379(3)   |
| C(7)-H(7)    | 0.9500     |
| C(8)-C(9)    | 1.405(3)   |
| C(8)-H(8)    | 0.9500     |
| C(9)-C(10)   | 1.385(3)   |
| C(9)-H(9)    | 0.9500     |
| C(10)-C(11)  | 1.408(3)   |
| C(10)-H(10)  | 0.9500     |
| C(11)-C(12)  | 1.429(3)   |
| C(12)-C(13)  | 1.492(3)   |
| C(13)-C(14)  | 1.521(3)   |
| C(13)-H(13A) | 0.9900     |
| C(13)-H(13B) | 0.9900     |
| C(14)-N(1)   | 1.473(2)   |
| C(14)-H(14)  | 1.0000     |
| C(15)-N(2)   | 1.462(2)   |

|                |            |
|----------------|------------|
| C(15)-C(16)    | 1.535(3)   |
| C(15)-H(15A)   | 0.9900     |
| C(15)-H(15B)   | 0.9900     |
| C(16)-C(17)    | 1.516(3)   |
| C(16)-H(16A)   | 0.9900     |
| C(16)-H(16B)   | 0.9900     |
| C(17)-C(18)    | 1.389(3)   |
| C(17)-C(22)    | 1.392(3)   |
| C(18)-C(19)    | 1.392(3)   |
| C(18)-H(18)    | 0.9500     |
| C(19)-C(20)    | 1.386(3)   |
| C(19)-H(19)    | 0.9500     |
| C(20)-C(21)    | 1.382(3)   |
| C(20)-H(20)    | 0.9500     |
| C(21)-C(22)    | 1.388(3)   |
| C(21)-H(21)    | 0.9500     |
| C(22)-H(22)    | 0.9500     |
| C(23)-O(2)     | 1.216(2)   |
| C(23)-O(3)     | 1.342(2)   |
| C(24)-O(3)     | 1.454(2)   |
| C(24)-C(25)    | 1.507(3)   |
| C(24)-H(24A)   | 0.9900     |
| C(24)-H(24B)   | 0.9900     |
| C(25)-H(25A)   | 0.9800     |
| C(25)-H(25B)   | 0.9800     |
| C(25)-H(25C)   | 0.9800     |
| N(3)-H(3)      | 0.8800     |
| N(2)-C(1)-N(1) | 107.29(15) |
| N(2)-C(1)-S(1) | 126.18(14) |
| N(1)-C(1)-S(1) | 126.53(15) |
| C(3)-C(2)-N(1) | 127.50(17) |
| C(3)-C(2)-H(2) | 116.2      |
| N(1)-C(2)-H(2) | 116.2      |

|                    |            |
|--------------------|------------|
| C(2)-C(3)-C(4)     | 125.37(17) |
| C(2)-C(3)-C(23)    | 115.38(16) |
| C(4)-C(3)-C(23)    | 119.21(16) |
| N(3)-C(4)-C(12)    | 108.81(16) |
| N(3)-C(4)-C(3)     | 120.46(17) |
| C(12)-C(4)-C(3)    | 130.72(17) |
| O(1)-C(5)-N(2)     | 125.49(18) |
| O(1)-C(5)-C(14)    | 127.64(17) |
| N(2)-C(5)-C(14)    | 106.86(16) |
| N(3)-C(6)-C(11)    | 107.60(16) |
| N(3)-C(6)-C(7)     | 129.41(18) |
| C(11)-C(6)-C(7)    | 122.98(18) |
| C(8)-C(7)-C(6)     | 116.66(18) |
| C(8)-C(7)-H(7)     | 121.7      |
| C(6)-C(7)-H(7)     | 121.7      |
| C(7)-C(8)-C(9)     | 121.78(17) |
| C(7)-C(8)-H(8)     | 119.1      |
| C(9)-C(8)-H(8)     | 119.1      |
| C(10)-C(9)-C(8)    | 121.02(18) |
| C(10)-C(9)-H(9)    | 119.5      |
| C(8)-C(9)-H(9)     | 119.5      |
| C(9)-C(10)-C(11)   | 118.93(19) |
| C(9)-C(10)-H(10)   | 120.5      |
| C(11)-C(10)-H(10)  | 120.5      |
| C(6)-C(11)-C(10)   | 118.61(17) |
| C(6)-C(11)-C(12)   | 107.63(17) |
| C(10)-C(11)-C(12)  | 133.76(19) |
| C(4)-C(12)-C(11)   | 106.47(16) |
| C(4)-C(12)-C(13)   | 129.08(17) |
| C(11)-C(12)-C(13)  | 124.43(17) |
| C(12)-C(13)-C(14)  | 113.00(16) |
| C(12)-C(13)-H(13A) | 109.0      |
| C(14)-C(13)-H(13A) | 109.0      |
| C(12)-C(13)-H(13B) | 109.0      |

|                     |            |
|---------------------|------------|
| C(14)-C(13)-H(13B)  | 109.0      |
| H(13A)-C(13)-H(13B) | 107.8      |
| N(1)-C(14)-C(13)    | 113.26(16) |
| N(1)-C(14)-C(5)     | 101.52(14) |
| C(13)-C(14)-C(5)    | 112.27(16) |
| N(1)-C(14)-H(14)    | 109.8      |
| C(13)-C(14)-H(14)   | 109.8      |
| C(5)-C(14)-H(14)    | 109.8      |
| N(2)-C(15)-C(16)    | 111.36(15) |
| N(2)-C(15)-H(15A)   | 109.4      |
| C(16)-C(15)-H(15A)  | 109.4      |
| N(2)-C(15)-H(15B)   | 109.4      |
| C(16)-C(15)-H(15B)  | 109.4      |
| H(15A)-C(15)-H(15B) | 108.0      |
| C(17)-C(16)-C(15)   | 112.23(15) |
| C(17)-C(16)-H(16A)  | 109.2      |
| C(15)-C(16)-H(16A)  | 109.2      |
| C(17)-C(16)-H(16B)  | 109.2      |
| C(15)-C(16)-H(16B)  | 109.2      |
| H(16A)-C(16)-H(16B) | 107.9      |
| C(18)-C(17)-C(22)   | 118.78(18) |
| C(18)-C(17)-C(16)   | 121.26(19) |
| C(22)-C(17)-C(16)   | 119.96(19) |
| C(17)-C(18)-C(19)   | 120.4(2)   |
| C(17)-C(18)-H(18)   | 119.8      |
| C(19)-C(18)-H(18)   | 119.8      |
| C(20)-C(19)-C(18)   | 120.3(2)   |
| C(20)-C(19)-H(19)   | 119.9      |
| C(18)-C(19)-H(19)   | 119.9      |
| C(21)-C(20)-C(19)   | 119.72(19) |
| C(21)-C(20)-H(20)   | 120.1      |
| C(19)-C(20)-H(20)   | 120.1      |
| C(20)-C(21)-C(22)   | 120.0(2)   |
| C(20)-C(21)-H(21)   | 120.0      |

|                     |            |
|---------------------|------------|
| C(22)-C(21)-H(21)   | 120.0      |
| C(21)-C(22)-C(17)   | 120.9(2)   |
| C(21)-C(22)-H(22)   | 119.6      |
| C(17)-C(22)-H(22)   | 119.6      |
| O(2)-C(23)-O(3)     | 122.93(18) |
| O(2)-C(23)-C(3)     | 125.12(17) |
| O(3)-C(23)-C(3)     | 111.95(16) |
| O(3)-C(24)-C(25)    | 109.26(17) |
| O(3)-C(24)-H(24A)   | 109.8      |
| C(25)-C(24)-H(24A)  | 109.8      |
| O(3)-C(24)-H(24B)   | 109.8      |
| C(25)-C(24)-H(24B)  | 109.8      |
| H(24A)-C(24)-H(24B) | 108.3      |
| C(24)-C(25)-H(25A)  | 109.5      |
| C(24)-C(25)-H(25B)  | 109.5      |
| H(25A)-C(25)-H(25B) | 109.5      |
| C(24)-C(25)-H(25C)  | 109.5      |
| H(25A)-C(25)-H(25C) | 109.5      |
| H(25B)-C(25)-H(25C) | 109.5      |
| C(2)-N(1)-C(1)      | 121.51(16) |
| C(2)-N(1)-C(14)     | 125.61(15) |
| C(1)-N(1)-C(14)     | 111.91(15) |
| C(1)-N(2)-C(5)      | 112.31(15) |
| C(1)-N(2)-C(15)     | 123.02(16) |
| C(5)-N(2)-C(15)     | 124.64(17) |
| C(6)-N(3)-C(4)      | 109.49(16) |
| C(6)-N(3)-H(3)      | 125.3      |
| C(4)-N(3)-H(3)      | 125.3      |
| C(23)-O(3)-C(24)    | 118.12(15) |

Symmetry transformations used to generate equivalent atoms:

Table 4. Anisotropic displacement parameters ( $\text{\AA}^2 \times 10^3$ ) for 140905lt\_A. The anisotropic displacement factor exponent takes the form:  $-2\pi^2[h^2 a^{*2}U^{11} + \dots + 2 h k a^* b^* U^{12}]$

|       | U <sup>11</sup> | U <sup>22</sup> | U <sup>33</sup> | U <sup>23</sup> | U <sup>13</sup> | U <sup>12</sup> |
|-------|-----------------|-----------------|-----------------|-----------------|-----------------|-----------------|
| C(1)  | 16(1)           | 14(1)           | 14(1)           | -2(1)           | 6(1)            | -2(1)           |
| C(2)  | 13(1)           | 13(1)           | 14(1)           | -3(1)           | 3(1)            | 2(1)            |
| C(3)  | 12(1)           | 12(1)           | 14(1)           | -3(1)           | 3(1)            | 0(1)            |
| C(4)  | 14(1)           | 13(1)           | 11(1)           | -2(1)           | 2(1)            | -3(1)           |
| C(5)  | 17(1)           | 14(1)           | 18(1)           | 1(1)            | 5(1)            | -1(1)           |
| C(6)  | 13(1)           | 13(1)           | 13(1)           | -1(1)           | 1(1)            | -1(1)           |
| C(7)  | 15(1)           | 20(1)           | 15(1)           | 0(1)            | 6(1)            | -2(1)           |
| C(8)  | 16(1)           | 19(1)           | 15(1)           | 4(1)            | 2(1)            | 0(1)            |
| C(9)  | 19(1)           | 18(1)           | 20(1)           | 4(1)            | 2(1)            | 4(1)            |
| C(10) | 16(1)           | 23(1)           | 18(1)           | 0(1)            | 6(1)            | 4(1)            |
| C(11) | 15(1)           | 16(1)           | 14(1)           | -1(1)           | 2(1)            | 0(1)            |
| C(12) | 15(1)           | 16(1)           | 14(1)           | -1(1)           | 3(1)            | 0(1)            |
| C(13) | 17(1)           | 17(1)           | 16(1)           | 2(1)            | 7(1)            | 3(1)            |
| C(14) | 14(1)           | 17(1)           | 16(1)           | -1(1)           | 3(1)            | 1(1)            |
| C(15) | 20(1)           | 19(1)           | 15(1)           | -1(1)           | 10(1)           | -1(1)           |
| C(16) | 24(1)           | 22(1)           | 17(1)           | -1(1)           | 6(1)            | -8(1)           |
| C(17) | 23(1)           | 12(1)           | 18(1)           | -1(1)           | 6(1)            | -6(1)           |
| C(18) | 24(1)           | 15(1)           | 24(1)           | -2(1)           | 9(1)            | -4(1)           |
| C(19) | 41(1)           | 15(1)           | 29(1)           | -3(1)           | 21(1)           | -5(1)           |
| C(20) | 56(2)           | 13(1)           | 17(1)           | 1(1)            | 10(1)           | -5(1)           |
| C(21) | 38(1)           | 15(1)           | 24(1)           | 0(1)            | -5(1)           | -4(1)           |
| C(22) | 22(1)           | 18(1)           | 24(1)           | -4(1)           | 6(1)            | -5(1)           |
| C(23) | 14(1)           | 14(1)           | 11(1)           | -2(1)           | 1(1)            | -1(1)           |
| C(24) | 20(1)           | 16(1)           | 20(1)           | 2(1)            | 10(1)           | 7(1)            |
| C(25) | 31(1)           | 22(1)           | 24(1)           | -3(1)           | 8(1)            | 6(1)            |
| N(1)  | 14(1)           | 14(1)           | 14(1)           | 2(1)            | 5(1)            | 2(1)            |
| N(2)  | 17(1)           | 17(1)           | 15(1)           | 0(1)            | 8(1)            | 1(1)            |
| N(3)  | 14(1)           | 16(1)           | 13(1)           | 1(1)            | 6(1)            | 2(1)            |
| O(1)  | 17(1)           | 27(1)           | 24(1)           | 5(1)            | 9(1)            | 4(1)            |
| O(2)  | 17(1)           | 17(1)           | 13(1)           | 0(1)            | 7(1)            | 2(1)            |

|      |       |       |       |      |       |      |
|------|-------|-------|-------|------|-------|------|
| O(3) | 22(1) | 14(1) | 23(1) | 3(1) | 13(1) | 6(1) |
| S(1) | 18(1) | 31(1) | 15(1) | 4(1) | 3(1)  | 6(1) |

Table 5. Hydrogen coordinates ( $\times 10^4$ ) and isotropic displacement parameters ( $\text{\AA}^2 \times 10^{-3}$ )  
for 140905lt\_A.

|        | x    | y    | z     | U(eq) |
|--------|------|------|-------|-------|
| H(2)   | 4156 | 3929 | 1300  | 16    |
| H(7)   | 3702 | 6094 | -5697 | 20    |
| H(8)   | 2522 | 6984 | -6233 | 20    |
| H(9)   | 1375 | 7269 | -4419 | 23    |
| H(10)  | 1323 | 6648 | -2061 | 22    |
| H(13A) | 1320 | 5677 | -149  | 19    |
| H(13B) | 2408 | 5737 | 1140  | 19    |
| H(14)  | 1531 | 4500 | -151  | 19    |
| H(15A) | 986  | 4686 | 5252  | 21    |
| H(15B) | 2172 | 4443 | 5984  | 21    |
| H(16A) | 386  | 3634 | 4664  | 25    |
| H(16B) | 1572 | 3350 | 4759  | 25    |
| H(18)  | -423 | 3656 | 7115  | 25    |
| H(19)  | -372 | 3347 | 9846  | 32    |
| H(20)  | 1223 | 2975 | 11412 | 34    |
| H(21)  | 2765 | 2900 | 10234 | 32    |
| H(22)  | 2724 | 3227 | 7524  | 25    |
| H(24A) | 6274 | 2940 | -160  | 22    |
| H(24B) | 6307 | 3431 | -1670 | 22    |
| H(25A) | 4755 | 2408 | -1784 | 38    |
| H(25B) | 5833 | 2323 | -2525 | 38    |
| H(25C) | 4955 | 2851 | -3303 | 38    |
| H(3)   | 4274 | 5109 | -3400 | 16    |
